# Supplementary material for: Effect of donor GSTM3 rs7483 genetic variant on tacrolimus elimination in the early period after liver transplantation
Source: PeerJ journal article supplement (doi:10.7717/peerj.18360), 2024-10-23
Supplement: Microarray.7z [file markerlist.xlsx]

## Sheet: markerlist.TXT
Index	Probe Set ID	Common Name	dbSNP RS ID	Type	mPCR Region	Chromosome	Physical Position	Allele Code	Alleles Reported Strand	Alleles-Alias Reported Strand	Reported Strand	Gene Strand	Associated Gene	PharmGKB Code	DbSNP annot	Reference Genome Flank
1	CN_CYP2A6	CYP2A6star4_deletion	N/A	CN_region	N	19	46041572	N/A	N/A	N/A	-	-	CYP2A6	PA121	N/A
2	CN_CYP2D6	CYP2D6star5_deletion	N/A	CN_region	N	22	40852557	N/A	N/A	N/A	-	-	CYP2D6	PA128	N/A
3	CN_GSTM1	GSTM1_deletion	N/A	CN_region	N	1	110032362	N/A	N/A	N/A	+	+	GSTM1	PA182	N/A
4	CN_GSTT1	GSTT1_deletion	N/A	CN_region	N	22	22706833	N/A	N/A	N/A	-	-	GSTT1	PA183	N/A
5	CN_UGT2B17	UGT2B17star2_deletion	N/A	CN_region	N	4	69100165	N/A	N/A	N/A	-	-	UGT2B17	PA37189	N/A
6	AM_10001	CHST3_c.*1130C>G	rs4148942	snp	N	10	73769359	A // B	C // G	N/A	+	+	CHST3	PA26503	NM_004273.4|||||mrna-utr|||	GGCAGCTCACGGGGCCTTCCATTTCCAGCCAGGCCTCATCTGGGGTAGGG[C/G]CAAGAGGAAAGTACAGAGTGCCCGTGGGGGAGAAGTCCCACCAGGATGCC
7	AM_10002	CHST3_c.*1155G>CorGG	rs34828900|rs4747236	in-del	N	10	73769384	A // B // C	C // G // GG	N/A	+	+	CHST3	PA26503	NM_004273.4|||||mrna-utr|||	AGCCAGGCCTCATCTGGGGTAGGGCCAAGAGGAAAGTACAGAGTGCCCGT[C/G/GG]GGGGAGAAGTCCCACCAGGATGCCCCCCCTCCCCTGAGAAGCCCGCCTTC
8	AM_10003	CHST3_c.*1278C>T	rs4148943	snp	N	10	73769507	A // B	C // T	N/A	+	+	CHST3	PA26503	NM_004273.4|||||mrna-utr|||	CCAGTTGGTTGCTGTGGTTACAGCCAGTGCCTGGAATTCCTCCTTAGGGC[C/T]CTGGGAAGAGTATTGCTTAACGCAGGATGTGCTGGGTGTTTTGTTTCGGG
9	AM_10004	CHST3_c.*1314G>A	rs4148944	snp	N	10	73769543	A // B	A // G	N/A	+	+	CHST3	PA26503	NM_004273.4|||||mrna-utr|||	TTCCTCCTTAGGGCCCTGGGAAGAGTATTGCTTAACGCAGGATGTGCTGG[A/G]TGTTTTGTTTCGGGCTTTTATTTATGGCTTGGTGTCTTTCTTGTTTCATG
10	AM_10005	CHST3_c.*1361C>T	rs4148945	snp	N	10	73769590	A // B	C // T	N/A	+	+	CHST3	PA26503	NM_004273.4|||||mrna-utr|||	TGGGTGTTTTGTTTCGGGCTTTTATTTATGGCTTGGTGTCTTTCTTGTTT[C/T]ATGGCTGTGTTTTTGCTTTTGTTTCTGTAGGAGCGCCTCTTCCAAGCAGT
11	AM_10006	CHST3_c.*1844T>C	rs4148946	snp	N	10	73770073	A // B	T // C	N/A	+	+	CHST3	PA26503	NM_004273.4|||||mrna-utr|||	GGGTTTACAATGGGCCGTATCTGACAGAGAAATTGTCCAGGAAACCAGAA[A/G]CAGAGCTGGGCAGCCCTCGGCAAACCCTTGCAGCTCCTTGTAAGCTCTGG
12	AM_10008	CHST3_c.*2126A>C	rs7072219	snp	N	10	73770355	A // B	A // C	N/A	+	+	CHST3	PA26503	NM_004273.4|||||mrna-utr|||	CACTGTGGACTCCAGTCATTCAAGGAGGTCTCCACTCTTGGGTTTTTTTT[A/C]TTTTCTTTTCTTTTGCTATTTTGCCTGAACACCCCAACACTCTTGGTTTT
13	AM_10010	CHST3_c.*2422C>T	rs4148949	snp	N	10	73770651	A // B	C // T	N/A	+	+	CHST3	PA26503	NM_004273.4|||||mrna-utr|||	CAGCCACCTCCATCCAAGGCTCTTCCTAGGGGCCCTGCTAATGTGGACAG[C/T]AGACTTTATCCCTCCTTCTTACTCTGGGCCAAGACCTCCCACTCCGCCCT
14	AM_10011	CHST3_c.*3477G>A	rs4148950	snp	N	10	73771706	A // B	A // G	N/A	+	+	CHST3	PA26503	NM_004273.4|||||mrna-utr|||	TCAGGTCCCCATAGAGAGGGAAAGAGAAGACCAGATGTGCATAGAAGCCA[A/G]TCTCTGTCACATACACCGCAGGTGGTCACCGAGTTATTTTCCAAAAGCTG
15	AM_10012	CHST3_c.*3555G>A	rs4148951	snp	N	10	73771784	A // B	A // G	N/A	+	+	CHST3	PA26503	NM_004273.4|||||mrna-utr|||	ACCGAGTTATTTTCCAAAAGCTGAGGAACATAAAGCAAATTTAGGCTTTT[A/G]TCCTTCTGCAATACATGCACTTGAAAATAAACAGAAAAGAGATGTTTAAT
16	AM_10013	CHST3_c.*3785G>A	rs1871450	snp	N	10	73772014	A // B	A // G	N/A	+	+	CHST3	PA26503	NM_004273.4|||||mrna-utr|||	CCCATCTCTGCCATCTGTCTGTCTGGCAATGGAAGGAGCTTCAGCAGGAG[A/G]TCCTTCCCAGAAGGTTGATTCTTGGCCTGGGTGGTAGAGGAGATATCCTG
17	AM_10014	CHST3_c.*4107T>C	rs731027	snp	N	10	73772336	A // B	C // T	N/A	+	+	CHST3	PA26503	NM_004273.4|||||mrna-utr|||	CTGTGTCCTCAAGGCAGTCCCCTCCCATCCCCATTCCCAAAGTCAGAAAG[C/T]GAAGCCAGATCTCAAGGGCTGATACCTGAGGCAAGGAGAGCTAAGGGGAG
18	AM_10016	CHST3_c.*4533C>T	rs730720	snp	N	10	73772762	A // B	T // C	N/A	+	+	CHST3	PA26503	NM_004273.4|||||mrna-utr|||	CCCCAGCAAAGCACCTGATCCATGACATGAGCTAGGCCTGTGAGGATGGC[A/G]CCATGTCTGTAGCCTTGGAAACACGTAACAAATTTGTCCCCAGTCCAGTT
19	AM_10017	CHST3_c.*4770G>A	rs4148953	snp	N	10	73772999	A // B	G // A	N/A	+	+	CHST3	PA26503	NM_004273.4|||||mrna-utr|||	GTGGATGCATATGTACATACCATGGCAGTGTATGCCGTGAAGGGGTGTCT[C/T]GTACCATGCAGACATGAAATAGCAAACAGGGCTGAGGTGTTGGCAAAAAG
20	AM_10019	MAT1A_c.*99A>T	rs1065766	snp	N	10	82033438	A // B	T // A	N/A	-	-	MAT1A	PA30646	NM_000429.2|||||mrna-utr|||	ATGATGACAGGACAGGCTAAATGAGAGGGACCTGGCTTTGCCCTGAGGGT[A/T]GGTGGGTGGGGAAGGCGATCAGCAGCCAGGCGTCTGGGGAAGAGGAGCAT
21	AM_10020	MAT1A_c.*67C>T	rs7087728	snp	N	10	82033470	A // B	T // C	N/A	-	-	MAT1A	PA30646	NM_000429.2|||||mrna-utr|||	TGGCTTTGCCCTGAGGGTTGGTGGGTGGGGAAGGCGATCAGCAGCCAGGC[A/G]TCTGGGGAAGAGGAGCATGGCCACCAGGTGCCTCCAGGGTGAGACCAGGC
22	AM_10021	MAT1A_c.885A>T(A295A)	rs17851642	snp	N	10	82034839	A // B	T // A	N/A	-	-	MAT1A	PA30646	NM_000429.2|NP_000420.1|A|A|295|coding-synonymous|T|A|295	CGGCAGAGCCCTGCTTTCACCAGAGACTTGGCCACCCAGCGGGCAGCATA[A/T]GCAGCTGAGCGGTCTACCTTGGTGTAGTCCTTCCCAGAGAAGGCCCCACC
23	AM_10022	MAT1A_c.791G>A(R264H)	rs72558181	snp	N	10	82034933	A // B	A // G	N/A	-	-	MAT1A	PA30646	NM_000429.2|NP_000420.1|G|R|264|coding-nonsynonymous|A|H|264	TCTTATCTTGATTTCTCTCCCTCTGCAGGGGGATGCGGGTGTCACTGGCC[A/G]TAAGATTATTGTGGACACCTATGGCGGCTGGGGGGCTCATGGTGGTGGGG
24	AM_10023	MAT1A_c.769-195A>T	rs9285726	snp	N	10	82035150	A // B	T // A	N/A	-	-	MAT1A	PA30646	NM_000429.2|NP_000420.1||||intron|||	CCAGAACTCTGGACTCCACTCCCAGCTCAGTCACTGACAACATATTGAAA[A/T]CAGGTAACCTGCCAAAGCTTCATTAGCAAGTGCAGAAGGTGGGCCAGGGG
25	AM_10024	MAT1A_c.769-218A>G	rs17102596	snp	N	10	82035173	A // B	A // G	N/A	-	-	MAT1A	PA30646	NM_000429.2|NP_000420.1||||intron|||	GGAGTGGCTGTGACCCCAGAGAACCCCTGGCCCACCTTCTGCACTTGCTA[A/G]TGAAGCTTTGGCAGGTTACCTGTTTTCAATATGTTGTCAGTGACTGAGCT
26	AM_10025	MAT1A_c.768+572G>A	rs4934027	snp	N	10	82035560	A // B	G // A	N/A	-	-	MAT1A	PA30646	NM_000429.2|NP_000420.1||||intron|||	TGTTACCTCCTTCTACTCTGTGTTTCTACACTCTACTTGCTACTGGAACC[C/T]GGGATGGAGCTCAACTCTGGCAAAGCACACACGGCTGAGGGCCCAGGCAG
27	AM_10028	CYP26C1_c.713C>T(R238Q)	rs7917267	snp	N	10	94824145	A // B	C // T	N/A	N/A	N/A	CYP26C1	PA27098	NM_183374.2|NP_899230.2|G|R|238|coding-nonsynonymous|A|Q|238	GCTTCTCAGAAATGGCCCCCTCCAGGTGCCGATGCAGCTGGTCCCTTGCC[C/T]GGATGCCCTGATGTTCAGGGAGAGAAGAAAGATGGGGCAGGAAGGCTAAG
28	AM_10030	CYP26A1_c.1314C>G(G438G)	rs2229104	snp	N	10	94836881	A // B	C // G	N/A	+	+	CYP26A1	PA27098	NM_000783.3|NP_000774.2|C|G|438|coding-synonymous|G|G|438	CCTCACCCAGAGGATGCATCCAGGTTCAGCTTCATTCCATTTGGAGGAGG[C/G]CTTAGGAGCTGTGTAGGCAAAGAATTTGCAAAAATTCTTCTCAAAATATT
29	AM_10031	CYP26A1_c.*2663T>G	rs4418728	snp	N	10	94839724	A // B	G // T	N/A	+	+	CYP26A1	PA27098	NM_000783.3||||||||	GGGTGGGCGACCAAGCTGGTGCCCTCTGCTTCCCCTTGCGCAATGCCCTT[G/T]GCCCTTGCTGCCTCCCATGTTCTCTTCAATCAGGACTGTGTTGCCACCAA
30	AM_10033	CYP26A1_c.*4046G>A	rs7905939	snp	N	10	94841107	A // B	G // A	N/A	+	+	CYP26A1	PA27098	NM_000783.3||||||||	TCTGCCTCTGAGGTTTGGGAGAATGATCACCAAAGACTGCTGAATGCCTC[C/T]GGAATAGGACGTGGGGATGTCCCATCTCCACAGCCCCAGGCATTTCAAAG
31	AM_10034	CYP26A1_c.*4927C>T	rs11187270	snp	N	10	94841988	A // B	C // T	N/A	+	+	CYP26A1	PA27098	NM_000783.3||||||||	TACGTTGAGGAGTTAGAAACCTGTTCACGCCTTTAGGATGGTAGATGCTT[C/T]AGGATTTTTGTTTGTTTGTTTTGTTTTGTTTTTTTTGAGATGGAGTCTCA
32	AM_10035	CYP26A1_c.*5152T>G	rs10882140	snp	N	10	94842213	A // B	G // T	N/A	+	+	CYP26A1	PA27098	NM_000783.3||||||||	GCCCAGCTAATTTTTGTATTTTTAGTAGAGATGGGATTTCGCCATGTTAA[G/T]AAGGATGGTCTCAATCTCTTGACATCGTGATCCACCCGCCTCGGCCTCCC
33	AM_10039	CYP2C18_c.204T>A(Y68X)	rs41291550	snp	N	10	96447562	A // B	A // T	N/A	+	+	CYP2C18	PA127	NM_000772.2|NP_000763.1|T|Y|68|coding-nonsynonymous|A|X|68	CTTTTCTATGTTTAGTTCTCAAAAGTCTATGGCCCTGTGTTCACTGTGTA[A/T]TTTGGCCTGAAGCCCATTGTGGTGTTGCATGGATATGAAGCAGTGAAGGA
34	AM_10042	CYP2C18_c.582insT	rs72558183	in-del	N	10	96454774	A // B	- // T	N/A	+	+	CYP2C18	PA127	||||||||	TCTGCTCTGTTATTTTCCATGATCGATTTGATTATAAAGATCAGAGGTTT[-/T]CTTAACTTGATGGAAAAATTCAATGAAAACCTCAGGATTCTGAGCTCTCCA
35	AM_10044	CYP2C18_c.694A>G(K232E)	rs2296681	snp	N	10	96466592	A // B	G // A	N/A	+	+	CYP2C18	PA127	NM_000772.2|NP_000763.1|A|K|232|coding-nonsynonymous|G|E|232	TATTCTCTCCAATACATAACTTTTAATGTAAGCAAAATTTTCAGCTATTT[C/T]ATTATGACTTCCTGGGAGATAATCGATGAGAGCAGGGAAATTATTGCAGA
36	AM_10047	CYP2C18_c.1154C>T(T385M)	rs2281891	snp	N	10	96493058	A // B	T // C	N/A	+	+	CYP2C18	PA127	NM_000772.2|NP_000763.1|C|T|385|coding-nonsynonymous|T|M|385	GGAATTCTTTGTCATTGTGCAGCACAGAAGTCAGGGATGTTATTATGGTC[A/G]TGCCCTGAAAATAGCAAAACAGACAAACTAAGTTATAAAGAAGTCAAAGA
37	AM_10048	CYP2C18_c.*31C>T(3'UTR)	rs2860840	snp	N	10	96495232	A // B	T // C	N/A	+	+	CYP2C18	PA127	NM_000772.2|||||mrna-utr|||	GAGAGAAGGGAGAGGCCAATGGCCCTGATAAGGGAGAATTGCAGGTGACA[A/G]CACAGGAGCAGCCAAACTATCTGCCCTTCTTCAGACAGGAATGAAGCAGA
38	AM_10052	CYP2C18_c.*592C>A(3'UTR)	rs1326830	snp	N	10	96495793	A // B	A // C	N/A	+	+	CYP2C18	PA127	NM_000772.2|NP_000763.1||||locus-region|||	TTTGGAAAAAAAAACTATGTCCAGGAGCAGCTGTAACCTGTAGGGAAATA[A/C]TGGAACAATCATCCATAAGAGGGATGAACATTAAGTGTTTGAATTCATGC
39	AM_10053	CYP2C19*17_-806C>T	rs12248560	snp	N	10	96521657	A // B	C // T	N/A	+	+	CYP2C19	PA124	NM_000769.1|NP_000760.1||||locus-region|||	GTTTTAGCAAACGATTTTTTTTTTCAAATTTGTGTCTTCTGTTCTCAAAG[C/T]ATCTCTGATGTAAGAGATAATGCGCCACGATGGGCATCAGAAGACCTCAG
40	AM_10054	CYP2C19*4_1A>G(M1V)	rs28399504	snp	N	10	96522463	A // B	A // G	N/A	+	+	CYP2C19	PA124	NM_000769.1|NP_000760.1|A|M|1|coding-nonsynonymous|G|V|1	AAGCTTGGAGTGCAAGCTCACGGTTGTCTTAACAAGAGGAGAAGGCTTCA[A/G]TGGATCCTTTTGTGGTCCTTGTGCTCTGTCTCTCATGTTTGCTTCTCCTT
41	AM_10055	CYP2C19*14_50T>C(L17P)	rs55752064	snp	N	10	96522512	A // B	C // T	N/A	+	+	CYP2C19	PA124	NM_000769.1|NP_000760.1|T|L|17|coding-nonsynonymous|C|P|17	AATGGATCCTTTTGTGGTCCTTGTGCTCTGTCTCTCATGTTTGCTTCTCC[C/T]TTCAATCTGGAGACAGAGCTCTGGGAGAGGAAAACTCCCTCCTGGCCCTA
42	AM_10056	CYP2C19*15_55A>C(I19L)	rs17882687	snp	N	10	96522517	A // B	A // C	N/A	+	+	CYP2C19	PA124	NM_000769.1|NP_000760.1|A|I|19|coding-nonsynonymous|C|L|19	ATCCTTTTGTGGTCCTTGTGCTCTGTCTCTCATGTTTGCTTCTCCTTTCA[A/C]TCTGGAGACAGAGCTCTGGGAGAGGAAAACTCCCTCCTGGCCCTACTCCT
43	AM_10059	CYP2C19*2B_12460G>C(E92D)	rs17878459	snp	N	10	96534922	A // B	G // C	N/A	+	+	CYP2C19	PA124	NM_000769.1|NP_000760.1|G|E|92|coding-nonsynonymous|C|D|92	CCTCTGTTAGCTCTTTCAGCCAGTGGGAAATGGCCTCTTCCAGAAAACTC[C/G]TCTCCAAGATCAATCAGGGCTTCCTTCACCACTTCATATCCATGCAGCAC
44	AM_10060	CYP2C19*8_12711T>C(W120R)	rs41291556	snp	N	10	96535173	A // B	C // T	N/A	+	+	CYP2C19	PA124	NM_000769.1|NP_000760.1|T|W|120|coding-nonsynonymous|C|R|120	TAGTTTCGTTTCTCTTCCTGTTAGGAATCGTTTTCAGCAATGGAAAGAGA[C/T]GGAAGGAGATCCGGCGTTTCTCCCTCATGACGCTGCGGAATTTTGGGATG
45	AM_10062	CYP2C19*6_12748G>A(R132Q)	rs72558184	snp	N	10	96535210	A // B	G // A	N/A	+	+	CYP2C19	PA124	NM_000769.1|NP_000760.1|G|R|132|coding-nonsynonymous|A|Q|132	CTTCCTCTTGAACACGGTCCTCAATGCTCCTCTTCCCCATCCCAAAATTC[C/T]GCAGCGTCATGAGGGAGAAACGCCGGATCTCCTTCCATCTCTTTCCATTG
46	AM_10064	CYP2C19*9_12784G>A(R144H)	rs17884712	snp	N	10	96535246	A // B	A // G	N/A	+	+	CYP2C19	PA124	NM_000769.1|NP_000760.1|G|R|144|coding-nonsynonymous|A|H|144	CCTCATGACGCTGCGGAATTTTGGGATGGGGAAGAGGAGCATTGAGGACC[A/G]TGTTCAAGAGGAAGCCCGCTGCCTTGTGGAGGAGTTGAGAAAAACCAAGG
47	AM_10068	CYP2C19*3_17948G>A(W212X)	rs4986893	snp	N	10	96540410	A // B	A // G	N/A	+	+	CYP2C19	PA124	NM_000769.1|NP_000760.1|G|W|212|coding-nonsynonymous|A|X|212	AACTTGATGGAAAAATTGAATGAAAACATCAGGATTGTAAGCACCCCCTG[A/G]ATCCAGGTAAGGCCAAGTTTTTTGCTTCCTGAGAAACCACTTACAGTCTT
48	AM_10069	CYP2C19*10_19153C>T(P227L)	rs6413438	snp	N	10	96541615	A // B	C // T	N/A	+	+	CYP2C19	PA124	NM_000769.1|NP_000760.1|C|P|227|coding-nonsynonymous|T|L|227	TGTTTTCTCTTAGATATGCAATAATTTTCCCACTATCATTGATTATTTCC[C/T]GGGAACCCATAACAAATTACTTAAAAACCTTGCTTTTATGGAAAGTGATA
49	AM_10070	CYP2C19*2_19154G>A(P227P)	rs4244285	snp	N	10	96541616	A // B // C	G // C // A	N/A	+	+	CYP2C19	PA124	NM_000769.1|NP_000760.1|G|P|227|coding-synonymous|A|P|227	ATATCACTTTCCATAAAAGCAAGGTTTTTAAGTAATTTGTTATGGGTTCC[C/G/T]GGGAAATAATCAATGATAGTGGGAAAATTATTGCATATCTAAGAGAAAAC
50	AM_10071	CYP2C19_721insG	rs72558185	in-del	N	10	96541656	A // B	- // G	N/A	+	+	CYP2C19	PA124	NM_000769.1|NP_000760.1|-|-|241|coding-nonsynonymous|G|G|241	TGATGTCCATCGATTCTTGGTGTTCTTTTACTTTCTCCAAAATATCACTTT[-/C]CCATAAAAGCAAGGTTTTTAAGTAATTTGTTATGGGTTCCCGGGAAATAA
51	AM_10072	CYP2C19*7_19294T>A(SpliceDefect)	rs72558186	snp	N	10	96541756	A // B	T // A	N/A	+	+	CYP2C19	PA124	NM_000769.1||||||||	GAATCACAAATACGCAAGCAGTCACATAACTAAGCTTTTGTTAACATTTT[A/T]CCTTCTCCATTTTGATCAGGAAGCAATCAATAAAGTCCCGAGGGTTGTTG
52	AM_10075	CYP2C19_80161G>A(V331I)	rs3758581	snp	N	10	96602623	A // B	A // G	N/A	+	+	CYP2C19	PA124	NM_000769.1|NP_000760.1|G|V|331|coding-nonsynonymous|A|I|331	TTCTTACTTGTGTCTTGTCAGCTAAAGTCCAGGAAGAGATTGAACGTGTC[A/G]TTGGCAGAAACCGGAGCCCCTGCATGCAGGACAGGGGCCACATGCCCTAC
53	AM_10077	CYP2C19*13_87290C>T(R410C)	rs17879685	snp	N	10	96609752	A // B	C // T	N/A	+	+	CYP2C19	PA124	NM_000769.1|NP_000760.1|C|R|410|coding-nonsynonymous|T|C|410	CTGTGCTACATGACAACAAAGAATTTCCCAACCCAGAGATGTTTGACCCT[C/T]GTCACTTTCTGGATGAAGGTGGAAATTTTAAGAAAAGTAACTACTTCATG
54	AM_10079	CYP2C19*5_90033C>T(R433W)	rs56337013	snp	N	10	96612495	A // B	C // T	N/A	+	+	CYP2C19	PA124	NM_000769.1|NP_000760.1|C|R|433|coding-nonsynonymous|T|W|433	AGTTACACATGAGGAGTAACTTCTCCCTATGTTTGTTATTTTCAGGAAAA[C/T]GGATTTGTGTGGGAGAGGGCCTGGCCCGCATGGAGCTGTTTTTATTCCTG
55	AM_10080	CYP2C19_90052delG	rs5787121	in-del	N	10	96612514	A // B	- // G	N/A	+	+	CYP2C19	PA124	NM_000769.1|NP_000760.1|G|G|439|coding-nonsynonymous|-|X|439	AGTTCTGTAAAATGAAGGTCAGGAATAAAAACAGCTCCATGCGGGCCAGG[-/C]CCTCTCCCACACAAATCCGTTTTCCTGAAAATAACAAACATAGGGAGAAG
56	AM_10082	CYP2C19*12_90209A>C(X491C)	rs55640102	snp	N	10	96612671	A // B	C // A	N/A	+	+	CYP2C19	PA124	NM_000769.1||||||||	AAAGAGAGCTGCAGGGACAGCACAGGAGCAGCCAGACCATCTGTGCTTCT[G/T]CAGACAGGAATGAAGCACAGCTGATAGAAGGGCGGGACAGAAGCAAATCC
57	AM_10090	CYP2C9_5080C>A(L19I)	rs67807361	snp	N	10	96698494	A // B	A // C	N/A	+	+	CYP2C9	PA126	NM_000771.3|NP_000762.2|C|L|19|coding-nonsynonymous|A|I|19	ATTCTCTTGTGGTCCTTGTGCTCTGTCTCTCATGTTTGCTTCTCCTTTCA[A/C]TCTGGAGACAGAGCTCTGGGAGAGGAAAACTCCCTCCTGGCCCCACTCCT
58	AM_10093	CYP2C9*13_3276T>C(L90P)	rs72558187	snp	N	10	96701715	A // B	C // T	N/A	+	+	CYP2C9	PA126	NM_000771.3|NP_000762.2|T|L|90|coding-nonsynonymous|C|P|90	CATAGTGGTGCTGCATGGATATGAAGCAGTGAAGGAAGCCCTGATTGATC[C/T]TGGAGAGGAGTTTTCTGGAAGAGGCATTTTCCCACTGGCTGAAAGAGCTA
59	AM_10095	CYP2C9*25_3531_3540del10	rs72558188	in-del	N	10	96701970	A // B	- // AGAAATGGAA	N/A	+	+	CYP2C9	PA126	NM_000771.3|NP_000762.2|AGAAATGGAA|KKWK|118|coding-nonsynonymous|-|X|118	CCTCCTAGTTTCGTTTCTCTTCCTGTTAGGAATTGTTTTCAGCAATGGAA[-/AGAAATGGAA]GGAGATCCGGCGTTTCTCCCTCATGACGCTGCGGAATTTTGGGATGGGGA
60	AM_10097	CYP2C9*14_3552G>A(R125H)	rs72558189	snp	N	10	96701991	A // B	A // G	N/A	+	+	CYP2C9	PA126	NM_000771.3|NP_000762.2|G|R|125|coding-nonsynonymous|A|H|125	CCTGTTAGGAATTGTTTTCAGCAATGGAAAGAAATGGAAGGAGATCCGGC[A/G]TTTCTCCCTCATGACGCTGCGGAATTTTGGGATGGGGAAGAGGAGCATTG
61	AM_10100	CYP2C9*2_3608C>T(R144C)	rs1799853	snp	N	10	96702047	A // B	C // T	N/A	+	+	CYP2C9	PA126	NM_000771.3|NP_000762.2|C|R|144|coding-nonsynonymous|T|C|144	CCCTCATGACGCTGCGGAATTTTGGGATGGGGAAGAGGAGCATTGAGGAC[C/T]GTGTTCAAGAGGAAGCCCGCTGCCTTGTGGAGGAGTTGAGAAAAACCAAG
62	AM_10104	CYP2C9*15_9100C>A(S162x)	rs72558190	snp	N	10	96707539	A // B	C // A	N/A	+	+	CYP2C9	PA126	NM_000771.3|NP_000762.2|C|S|162|coding-nonsynonymous|A|X|162	AGATCACATTGCAGGGAGCACAGCCCAGGATGAAAGTGGGATCACAGGGT[G/T]AGGCTAAATAATTAGAAACAATTTAAAATACTATTAAACTTTAGATATAA
63	AM_10106	CYP2C9*9_10535A>G(H251R)	rs2256871	snp	N	10	96708974	A // B	A // G	N/A	+	+	CYP2C9	PA126	NM_000771.3|NP_000762.2|A|H|251|coding-nonsynonymous|G|R|251	TAAAAACGTTGCTTTTATGAAAAGTTATATTTTGGAAAAAGTAAAAGAAC[A/G]CCAAGAATCAATGGACATGAACAACCCTCAGGACTTTATTGATTGCTTCC
64	AM_10107	CYP2C9*10_10598A>G(E272G)	rs9332130	snp	N	10	96709037	A // B	A // G	N/A	+	+	CYP2C9	PA126	NM_000771.3|NP_000762.2|A|E|272|coding-nonsynonymous|G|G|272	GGACATGAACAACCCTCAGGACTTTATTGATTGCTTCCTGATGAAAATGG[A/G]GAAGGTAAAATGTAAACAAAAGCTTAGTTATGTGACTGCTTGTGAATTTG
65	AM_10108	CYP2C9*6_10601delA(K273X)	rs9332131	in-del	N	10	96709039	A // B	- // A	N/A	+	+	CYP2C9	PA126	NM_000771.3|NP_000762.2|A|K|273|coding-nonsynonymous|-|X|273	CACAAATTCACAAGCAGTCACATAACTAAGCTTTTGTTTACATTTTACCT[-/T]CTCCATTTTCATCAGGAAGCAATCAATAAAGTCCTGAGGGTTGTTCATGT
66	AM_10109	CYP2C9*16_33497A>G(T299A)	rs72558192	snp	N	10	96731936	A // B	A // G	N/A	+	+	CYP2C9	PA126	NM_000771.3|NP_000762.2|A|T|299|coding-nonsynonymous|G|A|299	TTACTATTGAAAGCTTGGAAAACACTGCAGTTGACTTGTTTGGAGCTGGG[A/G]CAGAGACGACAAGCACAACCCTGAGATATGCTCTCCTTCTCCTGCTGAAG
67	AM_10111	CYP2C9*11_42542C>T(R335W)	rs28371685	snp	N	10	96740981	A // B	C // T	N/A	+	+	CYP2C9	PA126	NM_000771.3|NP_000762.2|C|R|335|coding-nonsynonymous|T|W|335	TCTTATCAGCTAAAGTCCAGGAAGAGATTGAACGTGTGATTGGCAGAAAC[C/T]GGAGCCCCTGCATGCAAGACAGGAGCCACATGCCCTACACAGATGCTGTG
68	AM_10112	CYP2C9_42612A>G(Y358C)	rs1057909	snp	N	10	96741051	A // B	A // G	N/A	+	+	CYP2C9	PA126	NM_000771.3|NP_000762.2|A|Y|358|coding-nonsynonymous|G|C|358	CAGGAGCCACATGCCCTACACAGATGCTGTGGTGCACGAGGTCCAGAGAT[A/G]CATTGACCTTCTCCCCACCAGCCTGCCCCATGCAGTGACCTGTGACATTA
69	AM_10113	CYP2C9*3_42614A>C(I359L)	rs1057910	snp	N	10	96741053	A // B	A // C	N/A	+	+	CYP2C9	PA126	NM_000771.3|NP_000762.2|A|I|359|coding-nonsynonymous|C|L|359	GGAGCCACATGCCCTACACAGATGCTGTGGTGCACGAGGTCCAGAGATAC[A/C]TTGACCTTCTCCCCACCAGCCTGCCCCATGCAGTGACCTGTGACATTAAA
70	AM_10114	CYP2C9*4_42615T>C(I359T)	rs56165452	snp	N	10	96741054	A // B	T // C	N/A	+	+	CYP2C9	PA126	NM_000771.3|NP_000762.2|T|I|359|coding-nonsynonymous|C|T|359	ATTTAATGTCACAGGTCACTGCATGGGGCAGGCTGGTGGGGAGAAGGTCA[A/G]TGTATCTCTGGACCTCGTGCACCACAGCATCTGTGTAGGGCATGTGGCTC
71	AM_10115	CYP2C9*5_42619C>G(D360E)	rs28371686	snp	N	10	96741058	A // B	G // C	N/A	+	+	CYP2C9	PA126	NM_000771.3|NP_000762.2|C|D|360|coding-nonsynonymous|G|E|360	CTGAATTTAATGTCACAGGTCACTGCATGGGGCAGGCTGGTGGGGAGAAG[C/G]TCAATGTATCTCTGGACCTCGTGCACCACAGCATCTGTGTAGGGCATGTG
72	AM_10119	CYP2C9_55221C>T(A441A)	rs2017319	snp	N	10	96748635	A // B	C // T	N/A	+	+	CYP2C9	PA126	NM_000771.3|NP_000762.2|C|A|441|coding-synonymous|T|A|441	CTGTGTTTGCTATTTTCAGGAAAACGGATTTGTGTGGGAGAAGCCCTGGC[C/T]GGCATGGAGCTGTTTTTATTCCTGACCTCCATTTTACAGAACTTTAACCT
73	AM_10120	CYP2C9_55323A>T(G475G)	rs1057911	snp	N	10	96748737	A // B	T // A	N/A	+	+	CYP2C9	PA126	NM_000771.3|NP_000762.2|A|G|475|coding-synonymous|T|G|475	CTTCAGACAGGAATGAAGCACAGCTGGTAGAAGGGCGGCACAGAGGCAAA[A/T]CCATTGACAACTGGAGTGGTGTCAAGGTTCTTTGGGTCAACCAGAGATTT
74	AM_10121	CYP2C9*12_50338C>T(P489S)	rs9332239	snp	N	10	96748777	A // B	C // T	N/A	+	+	CYP2C9	PA126	NM_000771.3|NP_000762.2|C|P|489|coding-nonsynonymous|T|S|489	TTGTCAATGGATTTGCCTCTGTGCCGCCCTTCTACCAGCTGTGCTTCATT[C/T]CTGTCTGAAGAAGAGCAGATGGCCTGGCTGCTGCTGTGCAGTCCCTGCAG
75	AM_10122	CYP2C8_32364C>T(3'UTR)	rs28399518	snp	N	10	96796796	A // B	C // T	N/A	-	-	CYP2C8	PA125	NM_000770.3|||||mrna-utr|||	TGCAACTCTTTTTTTATCAAGGACATTCCCACTATTATGTCTTCTCTGAC[C/T]TCTCATCAAATCTTCCCATTCACTCAATATCCCATAAGCATCCAAACTCC
76	AM_10123	CYP2C8*12_32184_32186delTTG(V461X)	rs3832694	in-del	N	10	96796974	A // B	- // TTG	N/A	-	-	CYP2C8	PA125	NM_000770.3|NP_000761.3|TTG|VD|461|coding-nonsynonymous|-|X|461	GCTATTTTTATTTCTAACCACAATTTTACAGAACTTTAACCTGAAATCTG[-/TTG]ATGATTTAAAGAACCTCAATACTACTGCAGTTACCAAAGGGATTGTTTCT
77	AM_10124	CYP2C8_30425C>G(P404A)	rs66501115	snp	N	10	96798735	A // B	G // C	N/A	-	-	CYP2C8	PA125	NM_000770.3|NP_000761.3|C|P|404|coding-nonsynonymous|G|A|404	CTTAAAGTTGCCATTCTTATCTAGAAAGTGGCCAGGGTCAAAGATATTTG[C/G]ATTAGGAAATTCTTTGTCATCATGTAGCACGGAAGTCAGTAATGCCATTA
78	AM_10125	CYP2C8*3_30411A>G(K399R)	rs10509681	snp	N	10	96798749	A // B	G // A	N/A	-	-	CYP2C8	PA125	NM_000770.3|NP_000761.3|A|K|399|coding-nonsynonymous|G|R|399	TCTTATCTAGAAAGTGGCCAGGGTCAAAGATATTTGGATTAGGAAATTCT[C/T]TGTCATCATGTAGCACGGAAGTCAGTAATGCCATTATGGTTGTGCCCTGG
79	AM_10126	CYP2C8_30384T>C(L390S)	rs72558194	snp	N	10	96798776	A // B	T // C	N/A	-	-	CYP2C8	PA125	NM_000770.3|NP_000761.3|T|L|390|coding-nonsynonymous|C|S|390	AGATATTTGGATTAGGAAATTCTTTGTCATCATGTAGCACGGAAGTCAGT[A/G]ATGCCATTATGGTTGTGCCCTGGAAGTAACAAAACAGATAATCTGATTTA
80	AM_10128	CYP2C8*2_11054A>T(I269F)	rs11572103	snp	N	10	96818106	A // B	T // A	N/A	-	-	CYP2C8	PA125	NM_000770.3|NP_000761.3|A|I|269|coding-nonsynonymous|T|F|269	AGAAATCAAAATACTGATCTGTTGCTAATATCTTACCTGCTCCATTTTGA[A/T]CAGGAAGCAATCGATAAAGTCCCGAGGATTGTTAACATCCAGTGATGCTT
81	AM_10129	CYP2C8*4_11041C>G(I264M)	rs1058930	snp	N	10	96818119	A // B	G // C	N/A	-	-	CYP2C8	PA125	NM_000770.3|NP_000761.3|C|I|264|coding-nonsynonymous|G|M|264	CTGATCTGTTGCTAATATCTTACCTGCTCCATTTTGATCAGGAAGCAATC[C/G]ATAAAGTCCCGAGGATTGTTAACATCCAGTGATGCTTGGTGTTCTTTTAC
82	AM_10131	CYP2C8*7or*8_4517C>T>G(R186XorG)	rs72558195	snp	N	10	96824643	A // B // C	T // G // C	N/A	-	-	CYP2C8	PA125	NM_000770.3|NP_000761.3|C|R|186|coding-nonsynonymous|T|X|186	ATTGAATCTTTTCATCAGGGTGAGAAAATTCTGATCTTTATAATCAAATC[A/C/G]TTTCTGGAAAACAACGGAGCAGATCACATTGCAGGGAGCACAGCCCAGGA
83	AM_10133	CYP2C8*5_2189delA(T159X)	rs72558196	in-del	N	10	96826971	A // B	- // A	N/A	-	-	CYP2C8	PA125	NM_000770.3|NP_000761.3|A|T|159|coding-nonsynonymous|-|X|159	ACAGGTAACTGTTAAGGTCAATGACGCAGAGTAGAGTCACCCACCCTTGG[-/T]TTTTCTCAACTCCTCCACAAGGCAGTGAGCTTCCTCTTGAACACGGTCCT
84	AM_10135	CYP2C8*3_2130G>A(R139K)	rs11572080	snp	N	10	96827030	A // B	A // G	N/A	-	-	CYP2C8	PA125	NM_000770.3|NP_000761.3|G|R|139|coding-nonsynonymous|A|K|139	GATCCGGCGTTTCTCCCTCACAACCTTGCGGAATTTTGGGATGGGGAAGA[A/G]GAGCATTGAGGACCGTGTTCAAGAGGAAGCTCACTGCCTTGTGGAGGAGT
85	AM_10138	CYP2C8_-86A>C	rs11572066	snp	N	10	96829245	A // B	A // C	N/A	-	-	CYP2C8	PA125	NM_000770.3|NP_000761.3||||locus-region|||	AGAAAAAAAGTATAAATTGGATCTAGGTGATTGTTTACTTTACATGTCAA[A/C]GAGACACACACTAAATTAGCAGGGAGTGTTATAAAAACTTTGGAGTGCAA
86	AM_10143	ABCC2_c.-24C>T(5'UTR)	rs717620	snp	N	10	101542578	A // B	C // T	N/A	+	+	ABCC2	PA116	NM_000392.3|||||mrna-utr|||	ATGAAACAAGTAAAGAAGAAACAACACAATCATATTAATAGAAGAGTCTT[C/T]GTTCCAGACGCAGTCCAGGAATCATGCTGGAGAAGTTCTGCAACTCTACT
87	AM_10144	ABCC2_c.-23G>A(5'UTR)	rs17216156	snp	N	10	101542579	A // B	A // G	N/A	+	+	ABCC2	PA116	NM_000392.3|||||mrna-utr|||	TGAAACAAGTAAAGAAGAAACAACACAATCATATTAATAGAAGAGTCTTC[A/G]TTCCAGACGCAGTCCAGGAATCATGCTGGAGAAGTTCTGCAACTCTACTT
88	AM_10145	ABCC2_c.116T>A(F39Y)	rs927344	snp	N	10	101544447	A // B	A // T	N/A	+	+	ABCC2	PA116	NM_000392.3|NP_000383.1|T|F|39|coding-nonsynonymous|A|Y|39	CCTGCCACTTTGTTTTGAGCAAACTGTTCTGGTGTGGATTCCCTTGGGCT[A/T]CCTATGGCTCCTGGCCCCCTGGCAGCTTCTCCACGTGTATAAATCCAGGA
89	AM_10146	ABCC2_c.159A>G(K53K)	rs17222596	snp	N	10	101544490	A // B	A // G	N/A	+	+	ABCC2	PA116	NM_000392.3|NP_000383.1|A|K|53|coding-synonymous|G|K|53	TTGGGCTACCTATGGCTCCTGGCCCCCTGGCAGCTTCTCCACGTGTATAA[A/G]TCCAGGACCAAGAGATCCTCTACCACCAAACTCTATCTTGCTAAGCAGGT
90	AM_10147	ABCC2_c.736A>C(M246L)	rs17222744	snp	N	10	101556957	A // B	A // C	N/A	+	+	ABCC2	PA116	NM_000392.3|NP_000383.1|A|M|246|coding-nonsynonymous|C|L|246	TTGATGAAGAGATGAAAACCAAGACATTAGTGAGCAAGTTTGAAACGCAC[A/C]TGAAGAGAGAGCTGCAGAAAGCCAGGCGGGCACTCCAGAGACGGCAGGAG
91	AM_10149	ABCC2_c.998A>G(D333G)	rs17222674	snp	N	10	101559094	A // B	A // G	N/A	+	+	ABCC2	PA116	NM_000392.3|NP_000383.1|A|D|333|coding-nonsynonymous|G|G|333	AACTTTCTACATGGTGCTCCTGAAATCATTCCTACTGAAGCTAGTGAATG[A/G]CATCTTCACGTTTGTGAGTCCTCAGCTGCTGAAGTGAGTCTCCAGGCCTC
92	AM_10150	ABCC2_c.1058G>A(R353H)	rs7080681	snp	N	10	101560169	A // B	A // G	N/A	+	+	ABCC2	PA116	NM_000392.3|NP_000383.1|G|R|353|coding-nonsynonymous|A|H|353	ACTAACTTGGCTTTTCTCTGGCAGATTGCTGATCTCCTTTGCAAGTGACC[A/G]TGACACATATTTGTGGATTGGATATCTCTGTGCAATCCTCTTATTCACTG
93	AM_10151	ABCC2_c.1219C>T(L407L)	rs17216198	snp	N	10	101563785	A // B	C // T	N/A	+	+	ABCC2	PA116	NM_000392.3|NP_000383.1|C|L|407|coding-synonymous|T|L|407	TGGCTTTGTCCATGGGTCCTAATTTCAATCCTTATCTTTAGGCATTGACC[C/T]TATCCAACTTGGCCAGGAAGGAGTACACCGTTGGAGAAACAGTGAACCTG
94	AM_10152	ABCC2_c.1249G>A(V417I)	rs2273697	snp	N	10	101563815	A // B	A // G	N/A	+	+	ABCC2	PA116	NM_000392.3|NP_000383.1|G|V|417|coding-nonsynonymous|A|I|417	CTTATCTTTAGGCATTGACCCTATCCAACTTGGCCAGGAAGGAGTACACC[A/G]TTGGAGAAACAGTGAACCTGATGTCTGTGGATGCCCAGAAGCTCATGGAT
95	AM_10153	ABCC2_c.1434G>T>A(A478AorA)	rs4267009	snp	N	10	101564000	A // B // C	T // G // A	N/A	+	+	ABCC2	PA116	NM_000392.3|NP_000383.1|G|A|478|coding-synonymous|T|A|478	CTGGGTGACTTTTTCTTTACCTGAATGGTCTTACTCTTGGTGGACAGTAT[A/C/T]GCATTAATTGGGATTACAAGCACCATCACCCCAACACCTGCTAAGACTGA
96	AM_10154	ABCC2_c.1457C>T(T486I)	rs17222589	snp	N	10	101564023	A // B	T // C	N/A	+	+	ABCC2	PA116	NM_000392.3|NP_000383.1|C|T|486|coding-nonsynonymous|T|I|486	CTTTAAAGAAAGCTTATATTCTTCTGGGTGACTTTTTCTTTACCTGAATG[A/G]TCTTACTCTTGGTGGACAGTATCGCATTAATTGGGATTACAAGCACCATC
97	AM_10155	ABCC2_c.1483A>G(K495E)	rs17222561	snp	N	10	101565157	A // B	G // A	N/A	+	+	ABCC2	PA116	NM_000392.3|NP_000383.1|A|K|495|coding-nonsynonymous|G|E|495	CACCTTGATTCCACTAAGAATCTCATTCATGATCTTTAAACGTTTGTCTT[C/T]ATTCTTCATATTTTTGACCTGCCAGGAAAAAAGCAAAAGAAAAACAATAT
98	AM_10156	ABCC2_c.1686T>G(F562L)	rs17216233	snp	N	10	101567857	A // B	G // T	N/A	+	+	ABCC2	PA116	NM_000392.3|NP_000383.1|T|F|562|coding-nonsynonymous|G|L|562	GGAATAAATTGCTCATGACCTTGCCCTTTCCAGGTATCTGTGGTCACATT[G/T]TCTGTTTATGTCCTGGTGGATAGCAACAATATTTTGGATGCACAAAAGGC
99	AM_10157	ABCC2_c.1803insC	rs72558198	in-del	N	10	101567974	A // B	- // C	N/A	+	+	ABCC2	PA116	||||||||	TCTTCAATATCCTGCGCTTTCCCCTGAGCATGCTTCCCATGATGATCTCC[-/C]TCCATGCTCCAGGTAGGTCGGCATTCTCACTGCTAACTCCCTGTCTCTGGT
100	AM_10158	ABCC2_c.2009T>C(I670T)	rs17222632	snp	N	10	101572816	A // B	C // T	N/A	+	+	ABCC2	PA116	NM_000392.3|NP_000383.1|T|I|670|coding-nonsynonymous|C|T|670	GTCTTTCAGTGTGAACCTGGACATTATGGCAGGCCAACTTGTGGCTGTGA[C/T]AGGCCCTGTCGGCTCTGGGAAATCCTCCTTGATATCAGCCATGCTGGGAG
101	AM_10159	ABCC2_c.2073C>A(V691V)	rs17222624	snp	N	10	101572880	A // B	C // A	N/A	+	+	ABCC2	PA116	NM_000392.3|NP_000383.1|C|V|691|coding-synonymous|A|V|691	GAGGCTTTTGCATTGGCATTCCCTCTCACCTTGATGGTGATGTGCCCGTG[G/T]ACATTTTCCATTTCTCCCAGCATGGCTGATATCAAGGAGGATTTCCCAGA
102	AM_10160	ABCC2_c.2153A>G(N718S)	rs3740072	snp	N	10	101577123	A // B	A // G	N/A	+	+	ABCC2	PA116	NM_000392.3|NP_000383.1|A|N|718|coding-nonsynonymous|G|S|718	TGCCTATGTCCCACAGCAGTCCTGGATTCAGAATGGCACCATAAAGGACA[A/G]CATCCTTTTTGGAACAGAGTTTAATGAAAAGAGGTACCAGCAAGTACTGG
103	AM_10161	ABCC2_c.2302C>T(R768W)	rs56199535	snp	N	10	101578577	A // B	C // T	N/A	+	+	ABCC2	PA116	NM_000392.3|NP_000383.1|C|R|768|coding-nonsynonymous|T|W|768	TGAATTATTTTCTTCTTCAGGGTATAAATCTTAGTGGGGGTCAGAAGCAG[C/T]GGATCAGCCTGGCCAGAGCTACCTACCAAAATTTAGACATCTATCTTCTA
104	AM_10162	ABCC2_c.2366C>T(S789F)	rs56220353	snp	N	10	101578641	A // B	C // T	N/A	+	+	ABCC2	PA116	NM_000392.3|NP_000383.1|C|S|789||||789	CAGAGCTACCTACCAAAATTTAGACATCTATCTTCTAGATGACCCCCTGT[C/T]TGCAGTGGATGCTCATGTAGGAAAACATATTTTTAATAAGGTCTTGGGCC
105	AM_10163	ABCC2_c.2546T>G(L849R)	rs17222617	snp	N	10	101578952	A // B	T // G	N/A	+	+	ABCC2	PA116	NM_000392.3|NP_000383.1|T|L|849|coding-nonsynonymous|G|R|849	TATGTCTTAGAAATGTCTTCAGATTCTTAGCAAACTCTCCTTTTTTGGCC[A/C]GGAGAGCACTGTAGGATCCTTTCTCTACAATTGTTCCATTCCCCAGAACT
106	AM_10164	ABCC2_c.2677G>C(E893Q)	rs3740071	snp	N	10	101590120	A // B	G // C	N/A	+	+	ABCC2	PA116	NM_000392.3|NP_000383.1|G|E|893|coding-nonsynonymous|C|Q|893	AAAGCTGTTCTCTCTTCTCATGGTTATGGAGGCTGCATCTTCGGGGATCT[C/G]TTCCACACTGGATATCAGCCCATAGTCATCGTCTTCTTCTTCACTGCCAT
107	AM_10166	ABCC2_c.2901C>A(Y967X)	rs17222547	snp	N	10	101591385	A // B	A // C	N/A	+	+	ABCC2	PA116	NM_000392.3|NP_000383.1|C|Y|967|coding-nonsynonymous|A|X|967	AGTTCTACTAATATTGAGGTGGGGACTTTGCAGGTGAAGTTCTCCATCTA[A/C]CTGGAGTACCTACAAGCAATAGGATTGTTTTCGATATTCTTCATCATCCT
108	AM_10167	ABCC2_c.2934G>A(S978S)	rs3740070	snp	N	10	101591418	A // B	G // A	N/A	+	+	ABCC2	PA116	NM_000392.3|NP_000383.1|G|S|978|coding-synonymous|A|S|978	CCAATAAAAGCCACAGAATTCATCACAAACGCAAGGATGATGAAGAATAT[C/T]GAAAACAATCCTATTGCTTGTAGGTACTCCAGGTAGATGGAGAACTTCAC
109	AM_10168	ABCC2_c.2944A>G(I982V)	rs17222554	snp	N	10	101591428	A // B	A // G	N/A	+	+	ABCC2	PA116	NM_000392.3|NP_000383.1|A|I|982|coding-nonsynonymous|G|V|982	CCATCTACCTGGAGTACCTACAAGCAATAGGATTGTTTTCGATATTCTTC[A/G]TCATCCTTGCGTTTGTGATGAATTCTGTGGCTTTTATTGGATCCAACCTC
110	AM_10169	ABCC2_c.3107T>C(I1036T)	rs45441199	snp	N	10	101591737	A // B	C // T	N/A	+	+	ABCC2	PA116	NM_000392.3|NP_000383.1|T|I|1036|coding-nonsynonymous|C|T|1036	TCAGGGATTCCTGTGCATGGTGCTGACAAAACTGCTTCCATCTCTAGGTA[C/T]ATTTGTGTTCATAGCACATTTCTGGAGTGCCTTTGGTTTCGTCCATGCAT
111	AM_10171	ABCC2_c.3196C>T(R1066X)	rs72558199	snp	N	10	101591826	A // B	C // T	N/A	+	+	ABCC2	PA116	NM_000392.3|NP_000383.1|C|R|1066|coding-nonsynonymous|T|X|1066	TCGTCCATGCATCAAATATCTTGCACAAGCAACTGCTGAACAATATCCTT[C/T]GAGCACCTATGAGATTTTTTGACACAACACCCACAGGCCGGATTGTGAAC
112	AM_10172	ABCC2_c.3396T>C(I1132I)	rs17216345	snp	N	10	101594274	A // B	C // T	N/A	+	+	ABCC2	PA116	NM_000392.3|NP_000383.1|T|I|1132|coding-synonymous|C|I|1132	ATCTGCATGGCCACTCCTGTCTTCACCATCATCGTCATTCCTCTTGGCAT[C/T]ATTTATGTATCTGTTCAGGTAGGTTTGGAAATGGCTAAGTCATCCTTCCT
113	AM_10174	ABCC2_c.3517A>T(I1173F)	rs72558201	snp	N	10	101595950	A // B	A // T	N/A	+	+	ABCC2	PA116	NM_000392.3|NP_000383.1|A|I|1173|coding-nonsynonymous|T|F|1173	GGTCCCCAATCTACTCTCACTTCAGCGAGACCGTATCAGGTTTGCCAGTT[A/T]TCCGTGCCTTTGAGCACCAGCAGCGATTTCTGAAACACAATGAGGTGAGG
114	AM_10175	ABCC2_c.3542G>T(R1181L)	rs8187692	snp	N	10	101595975	A // B	G // T	N/A	+	+	ABCC2	PA116	NM_000392.3|NP_000383.1|G|R|1181|coding-nonsynonymous|T|L|1181	CGAGACCGTATCAGGTTTGCCAGTTATCCGTGCCTTTGAGCACCAGCAGC[G/T]ATTTCTGAAACACAATGAGGTGAGGATTGACACCAACCAGAAATGTGTCT
115	AM_10176	ABCC2_c.3561G>A(E1187E)	rs17216324	snp	N	10	101595994	A // B	A // G	N/A	+	+	ABCC2	PA116	NM_000392.3|NP_000383.1|G|E|1187|coding-synonymous|A|E|1187	CCAGTTATCCGTGCCTTTGAGCACCAGCAGCGATTTCTGAAACACAATGA[A/G]GTGAGGATTGACACCAACCAGAAATGTGTCTTTTCCTGGATCACCTCCAA
116	AM_10177	ABCC2_c.3563T>A(V1188E)	rs17222723	snp	N	10	101595996	A // B	A // T	N/A	+	+	ABCC2	PA116	NM_000392.3|NP_000383.1|T|V|1188|coding-nonsynonymous|A|E|1188	AGTTATCCGTGCCTTTGAGCACCAGCAGCGATTTCTGAAACACAATGAGG[A/T]GAGGATTGACACCAACCAGAAATGTGTCTTTTCCTGGATCACCTCCAACA
117	AM_10178	ABCC2_c.3817A>G(T1273A)	rs8187699	snp	N	10	101603631	A // B	A // G	N/A	+	+	ABCC2	PA116	NM_000392.3|NP_000383.1|A|T|1273|coding-nonsynonymous|G|A|1273	TGAGGATGACATCAGAAATAGAGACCAACATTGTGGCTGTTGAGCGAATA[A/G]CTGAGTACACAAAAGTGGAAAATGAGGTAAGGAGGAACTGGAAAAATCCA
118	AM_10179	ABCC2_c.3872C>T(P1291L)	rs17216317	snp	N	10	101604107	A // B	C // T	N/A	+	+	ABCC2	PA116	NM_000392.3|NP_000383.1|C|P|1291|coding-nonsynonymous|T|L|1291	TCTCATCTTGTCTCCTTGCCAGGCACCCTGGGTGACTGATAAGAGGCCTC[C/T]GCCAGATTGGCCCAGCAAAGGCAAGATCCAGTTTAACAACTACCAAGTGC
119	AM_10180	ABCC2_c.3895A>C(K1299Q)	rs4148400	snp	N	10	101604130	A // B	A // C	N/A	+	+	ABCC2	PA116	NM_000392.3|NP_000383.1|A|K|1299|coding-nonsynonymous|C|Q|1299	CACCCTGGGTGACTGATAAGAGGCCTCCGCCAGATTGGCCCAGCAAAGGC[A/C]AGATCCAGTTTAACAACTACCAAGTGCGGTACCGACCTGAGCTGGATCTG
120	AM_10181	ABCC2_c.3927C>T(Y1309Y)	rs4148401	snp	N	10	101604162	A // B	T // C	N/A	+	+	ABCC2	PA116	NM_000392.3|NP_000383.1|C|Y|1309|coding-synonymous|T|Y|1309	CTACCGATGTCACAAGTGATCCCTCTGAGGACCAGATCCAGCTCAGGTCG[A/G]TACCGCACTTGGTAGTTGTTAAACTGGATCTTGCCTTTGCTGGGCCAATC
121	AM_10182	ABCC2_c.3928C>T(R1310X)	rs66898362	snp	N	10	101604163	A // B	C // T	N/A	+	+	ABCC2	PA116	NM_000392.3|NP_000383.1|C|R|1310|coding-nonsynonymous|T|X|1310	ATTGGCCCAGCAAAGGCAAGATCCAGTTTAACAACTACCAAGTGCGGTAC[C/T]GACCTGAGCTGGATCTGGTCCTCAGAGGGATCACTTGTGACATCGGTAGC
122	AM_10183	ABCC2_c.3972C>T(I1324I)	rs3740066	snp	N	10	101604207	A // B	C // T	N/A	+	+	ABCC2	PA116	NM_000392.3|NP_000383.1|C|I|1324|coding-synonymous|T|I|1324	CGGTACCGACCTGAGCTGGATCTGGTCCTCAGAGGGATCACTTGTGACAT[C/T]GGTAGCATGGAGAAGGTAGGTGGAGTGAAGGAAGGCCTGGATGGGAGGCC
123	AM_10184	ABCC2_c.4062C>T(A1354A)	rs17216275	snp	N	10	101605455	A // B	C // T	N/A	+	+	ABCC2	PA116	NM_000392.3|NP_000383.1|C|A|1354|coding-synonymous|T|A|1354	GCTGGAAAGTCATCCCTCACAAACTGCCTCTTCAGAATCTTAGAGGCTGC[C/T]GGTGGTCAGATTATCATTGATGGAGTAGATATTGCTTCCATTGGGCTCCA
124	AM_10185	ABCC2_c.4110C>T(L1370L)	rs7899457	snp	N	10	101605503	A // B	C // T	N/A	+	+	ABCC2	PA116	NM_000392.3|NP_000383.1|C|L|1370|coding-synonymous|T|L|1370	GCCGGTGGTCAGATTATCATTGATGGAGTAGATATTGCTTCCATTGGGCT[C/T]CACGACCTCCGAGAGAAGCTGACCATCATCCCCCAGGTGAGCTCTAGAAC
125	AM_10188	ABCC2_c.4290G>T(V1430V)	rs1137968	snp	N	10	101606861	A // B	G // T	N/A	+	+	ABCC2	PA116	NM_000392.3|NP_000383.1|G|V|1430|coding-synonymous|T|V|1430	CACCTCAAGTCTTTTGTGGCCAGCCTGCAACTTGGGTTATCCCACGAAGT[G/T]ACAGAGGCTGGTGGCAACCTGAGGTAATGTTCCATAGCCTGCTACCCCTG
126	AM_10189	ABCC2_c.4348G>T>A(A1450SorT)	rs56296335	snp	N	10	101610393	A // B // C	A // G // T	N/A	+	+	ABCC2	PA116	NM_000392.3|NP_000383.1|G|A|1450||||1450	CTTCTATTGGCTGCAGCATAGGCCAGAGGCAGCTGCTGTGCCTGGGCAGG[A/G/T]CTCTGCTTCGGAAATCCAAGATCCTGGTCCTGGATGAGGCCACTGCTGCG
127	AM_10190	ABCC2_c.4410G>A(E1470E)	rs8187706	snp	N	10	101610455	A // B	A // G	N/A	+	+	ABCC2	PA116	NM_000392.3|NP_000383.1|G|E|1470|coding-synonymous|A|E|1470	AAATCCAAGATCCTGGTCCTGGATGAGGCCACTGCTGCGGTGGATCTAGA[A/G]ACAGACAACCTCATTCAGACGACCATCCAAAACGAGTTCGCCCACTGCAC
128	AM_10191	ABCC2_c.4488C>T(H1496H)	rs8187707	snp	N	10	101610533	A // B	C // T	N/A	+	+	ABCC2	PA116	NM_000392.3|NP_000383.1|C|H|1496|coding-synonymous|T|H|1496	CAAAACGAGTTCGCCCACTGCACAGTGATCACCATCGCCCACAGGCTGCA[C/T]ACCATCATGGACAGTGACAAGTGAGTGTAGGGGGACAGGGCTTGACACGG
129	AM_10192	ABCC2_c.4527C>T(N1509N)	rs8187709	snp	N	10	101611277	A // B	C // T	N/A	+	+	ABCC2	PA116	NM_000392.3|NP_000383.1|C|N|1509|coding-synonymous|T|N|1509	TAAGACTTTTATTTCTTTCTTCCTTGTTTCAGGGTAATGGTCCTAGACAA[C/T]GGGAAGATTATAGAGTGCGGCAGCCCTGAAGAACTGCTACAAATCCCTGG
130	AM_10193	ABCC2_c.4544G>A(C1515Y)	rs8187710	snp	N	10	101611294	A // B	A // G	N/A	+	+	ABCC2	PA116	NM_000392.3|NP_000383.1|G|C|1515|coding-nonsynonymous|A|Y|1515	TCTTCCTTGTTTCAGGGTAATGGTCCTAGACAACGGGAAGATTATAGAGT[A/G]CGGCAGCCCTGAAGAACTGCTACAAATCCCTGGACCCTTTTACTTTATGG
131	AM_10194	CYP17A1_6417G>A(P428P)	rs6164	snp	N	10	104590702	A // B	A // G	N/A	-	-	CYP17A1	PA27090	NM_000102.3|NP_000093.1|G|P|428|coding-synonymous|A|P|428	TTGCCTGCAGAGCGTTTCTTGAATCCAGCGGGGACCCAGCTCATCTCACC[A/G]TCAGTAAGCTATTTGCCCTTCGGAGCAGGACCTCGCTCCTGTATAGGTGA
132	AM_10198	CYP17A1_4249C>T(D283D)	rs1042386	snp	N	10	104592870	A // B	T // C	N/A	-	-	CYP17A1	PA27090	NM_000102.3|NP_000093.1|C|D|283|coding-synonymous|T|D|283	AAGATGTCCCCTATGGTGGTGAGAATGTGGTTATCTGAAAGCAGCTCTGA[A/G]TCTTGATCTGGGCCAGCATTGCCATTATCTGAGTTCATCTTGGCTTGCAT
133	AM_10201	CYP17A1_195G>T(S65S)	rs6163	snp	N	10	104596924	A // B	T // G	N/A	-	-	CYP17A1	PA27090	NM_000102.3|NP_000093.1|G|S|65|coding-synonymous|T|S|65	GCCAGCTGGTGGTGGCCGACAATCACTGTAGTCTTGGTGCCCATACGAAC[A/C]GAATAGATGGGGCCATATTTTTTCTGCAGCTTGAAGAAGTTGTTATGCAT
134	AM_10202	CYP17A1_138C>T(H46H)	rs6162	snp	N	10	104596981	A // B	T // C	N/A	-	-	CYP17A1	PA27090	NM_000102.3|NP_000093.1|C|H|46|coding-synonymous|T|H|46	ATGGGGCCATATTTTTTCTGCAGCTTGAAGAAGTTGTTATGCATATGGCC[A/G]TGTCTGGGGAGGAATGGCAGGCTGCCCACCAGGGGCAGGGACAGGAGGCT
135	AM_10203	CYP17A1_66C>G(C22W)	rs762563	snp	N	10	104597053	A // B	C // G	N/A	-	-	CYP17A1	PA27090	NM_000102.3|NP_000093.1|C|C|22|coding-nonsynonymous|G|W|22	GCTCTCTTGCTGCTTACCCTAGCTTATTTGTTTTGGCCCAAGAGAAGGTG[C/G]CCTGGTGCCAAGTACCCCAAGAGCCTCCTGTCCCTGCCCCTGGTGGGCAG
136	AM_10206	CYP17A1_-34T>C	rs743572	snp	N	10	104597152	A // B	C // T	N/A	-	-	CYP17A1	PA27090	NM_000102.3|||||mrna-utr|||	TTTAAAAGGCCTCCTTGTGCCCTAGAGTTGCCACAGCTCTTCTACTCCAC[C/T]GCTGTCTATCTTGCCTGCCGGCACCCAGCCACCATGTGGGAGCTCGTGGC
137	AM_10220	GSTO1_c.257C>G(S86C)	rs11509436	snp	N	10	106019447	A // B	C // G	N/A	+	+	GSTO1	PA133787054	NM_004832.1|NP_004823.1|C|S|86|coding-nonsynonymous|G|C|86	TGGTCTGGTGCCAGTTCTGGAAAACAGTCAGGGTCAGCTGATCTACGAGT[C/G]TGCCATCACCTGTGAGTACCTGGATGAAGCATACCCAGGGAAGAAGCTGT
138	AM_10221	GSTO1_c.419C>A(A140D)	rs4925	snp	N	10	106022789	A // B	A // C	N/A	+	+	GSTO1	PA133787054	NM_004832.1|NP_004823.1|C|A|140|coding-nonsynonymous|A|D|140	GCCATCCTTGGTAGGAAGCTTTATTAGAAGCCAAAATAAAGAAGACTATG[A/C]TGGCCTAAAAGAAGAATTTCGTAAAGAATTTACCAAGCTAGAGGAGGTAA
139	AM_10225	GSTO1_c.636C>T(V212V)	rs78978552	snp	N	10	106027073	A // B	C // T	N/A	+	+	GSTO1	PA133787054	NM_004832.1|NP_004823.1|C|V|212|coding-synonymous|T|V|212	ACTCCAAAACTGAAACTGTGGATGGCAGCCATGAAGGAAGATCCCACAGT[C/T]TCAGCCCTGCTTACTAGTGAGAAAGACTGGCAAGGTTTCCTAGAGCTCTA
140	AM_10226	GSTO1_c.650C>A(T217N)	rs15032	snp	N	10	106027087	A // B	A // C	N/A	+	+	GSTO1	PA133787054	NM_004832.1|NP_004823.1|C|T|217|coding-nonsynonymous|A|N|217	ACTGTGGATGGCAGCCATGAAGGAAGATCCCACAGTCTCAGCCCTGCTTA[A/C]TAGTGAGAAAGACTGGCAAGGTTTCCTAGAGCTCTACTTACAGAACAGCC
141	AM_10229	GSTO1_c.*2G>A	rs7589	snp	N	10	106027165	A // B	A // G	N/A	+	+	GSTO1	PA133787054	NM_004832.1|NP_004823.1||||locus-region|||	AGAGCTCTACTTACAGAACAGCCCTGAGGCCTGTGACTATGGGCTCTGAA[A/G]GGGGCAGGAGTCAGCAATAAAGCTATGTCTGATATTTTCCTTCACTAATA
142	AM_10240	CYP2E1*5_-1293G>C(Promoter)	rs3813867	snp	N	10	135339605	A // B	C // G	N/A	+	+	CYP2E1	PA129	NM_000773.3|NP_000764.1||||locus-region|||	GCCCCTGAAGCCTCTGCCAGAGGCCAACGCCCCTTCTTGGTTCAGGAGAG[C/G]TGCAGTGTTAGGTGCAGCACAACCAATGACTTGCTTATGTGGCTAATAAA
143	AM_10241	CYP2E1*5_-1053C>T(Promoter)	rs2031920	snp	N	10	135339845	A // B	C // T	N/A	+	+	CYP2E1	PA129	NM_000773.3|NP_000764.1||||locus-region|||	CTCATCATATTTTCTATTATACATAAAGATTCATTGTTAATATAAAAGTA[C/T]AAAATTGCAACCTATGAATTAAGAACTTCTATATATTGCCAGTTAGAAGA
144	AM_10242	CYP2E1*7C_-352A>G(Promoter)	rs2070672	snp	N	10	135340548	A // B	A // G	N/A	+	+	CYP2E1	PA129	NM_000773.3|NP_000764.1||||locus-region|||	CCTACTCCAAACAAATGCATGGGGATGTGGCTGGAGTTCCCCGTTGTCTA[A/G]CCAGTGCCAAAGGGCAGGACGGTACCTCACCCCACGTTCTTAACTATGGG
145	AM_10243	CYP2E1*7_-333T>A(Promoter)	rs2070673	snp	N	10	135340567	A // B	A // T	N/A	+	+	CYP2E1	PA129	NM_000773.3|NP_000764.1||||locus-region|||	TGGGGATGTGGCTGGAGTTCCCCGTTGTCTAACCAGTGCCAAAGGGCAGG[A/T]CGGTACCTCACCCCACGTTCTTAACTATGGGTTGGCAACATGTTCCTGGA
146	AM_10244	CYP2E1*7B_-71G>T(Promoter)	rs6413420	snp	N	10	135340829	A // B	G // T	N/A	+	+	CYP2E1	PA129	NM_000773.3|NP_000764.1||||locus-region|||	GATAGACGAGTAGCAAGAGGGCATTGGTTGGTGGGTCACCCTCCTTCTCA[G/T]AACACATTATAAAAACCTTCCGTTTCCACAGGATTGTCTCCCGGGCTGGC
147	AM_10249	CYP2E1*2_1132G>A(R76H)	rs72559710	snp	N	10	135342034	A // B // C	A // C // G	N/A	+	+	CYP2E1	PA129	NM_000773.3|NP_000764.1|G|R|76|coding-nonsynonymous|A|H|76	GTTGGCCCAGCGCTTCGGGCCGGTGTTCACGCTGTACGTGGGCTCGCAGC[A/C/G]CATGGTGGTGATGCACGGCTACAAGGCGGTGAAGGAAGCGCTGCTGGACT
148	AM_10251	CYP2E1*4_4768G>A(V179I)	rs6413419	snp	N	10	135345675	A // B	A // G	N/A	+	+	CYP2E1	PA129	NM_000773.3|NP_000764.1|G|V|179|coding-nonsynonymous|A|I|179	TAGGCCAGCCTTTCGACCCCACCTTCCTCATCGGCTGCGCGCCCTGCAAC[A/G]TCATAGCCGACATCCTCTTCCGCAAGCATTTTGACTACAATGATGAGAAG
149	AM_10253	CYP2E1_6498C>T(I321I)	rs915909	snp	N	10	135347397	A // B	C // T	N/A	+	+	CYP2E1	PA129	NM_000773.3|NP_000764.1|C|I|321|coding-synonymous|T|I|321	AGCACAACTCTGAGATATGGGCTCCTGATTCTCATGAAATACCCTGAGAT[C/T]GAAGGTAGGCAAGTGACTGAAGGGACACCGTGCGTGCGGCTGCATCTCCC
150	AM_10257	CYP2E1*3_10023G>A(V389I)	rs55897648	snp	N	10	135351264	A // B	A // G	N/A	+	+	CYP2E1	PA129	NM_000773.3|NP_000764.1|G|V|389|coding-nonsynonymous|A|I|389	TTGTTAACATGACTCACTGAGACAGTCTTTGTTTCTCCTAGGGCACAGTC[A/G]TAGTGCCAACTCTGGACTCTGTTTTGTATGACAACCAAGAATTTCCTGAT
151	AM_10258	CYP2E1_10463T>C(F421F)	rs2515641	snp	N	10	135351362	A // B	C // T	N/A	+	+	CYP2E1	PA129	NM_000773.3|NP_000764.1|T|F|421|coding-synonymous|C|F|421	GATCCAGAAAAGTTTAAGCCAGAACACTTCCTGAATGAAAATGGAAAGTT[C/T]AAGTACAGTGACTATTTCAAGCCATTTTCCACAGGTGAGAAAGATCAGAG
152	AM_10260	ABCC8_c.4714G>A(V1572I)	rs8192690	snp	N	11	17414570	A // B	A // G	N/A	-	-	ABCC8	PA24395	NM_000352.3|NP_000343.2|G|V|1572|coding-nonsynonymous|A|I|1572	CCATCCTTGAGTTCGATAAGCCAGAGAAGCTGCTCAGCCGGAAGGACAGC[A/G]TCTTCGCCTCCTTCGTCCGTGCAGACAAGTGACCTGCCAGAGCCCAAGTG
153	AM_10270	ABCC8_c.4105T>G(S1369A)	rs757110	snp	N	11	17418477	A // B	G // T	N/A	-	-	ABCC8	PA24395	NM_000352.3|NP_000343.2|T|S|1369|coding-nonsynonymous|G|A|1369	GCTACGACAGCTCCCTGAAGCCGGTGCTGAAGCACGTCAATGCCCTCATC[G/T]CCCCTGGACAGAAGGTCAGAGCACGGGCCCAACCCAATGCTGCAGGACAG
154	AM_10277	ABCC8_c.3041T>A(L1014X)	rs67706538	snp	N	11	17428556	A // B	A // T	N/A	-	-	ABCC8	PA24395	NM_000352.3|NP_000343.2|T|L|1014|coding-nonsynonymous|A|X|1014	GCGAGCCTGCGCCAAGTACCTGTCCTCCGCCGGCATCCTGCTCCTGTCGT[A/T]GCTGGTCTTCTCACAGCTGCTCAAGCACATGGTCCTGGTGGCCATCGACT
155	AM_10281	ABCC8_c.2506C>T(R836X)	rs72559722	snp	N	11	17434263	A // B	T // C	N/A	-	-	ABCC8	PA24395	NM_000352.3|NP_000343.2|C|R|836|coding-nonsynonymous|T|X|836	CAAGAAGACAACGTTGGCGTGCTGGTAGAGGGCTCGGGCCACACTGATTC[A/G]CTGGCGTTGACCACCAGACAGGTTGATGCCCTGTCACCAAAGAGGAGGAA
156	AM_10285	ABCC8_c.2101_2102insT(I701X)	rs72559724	in-del	N	11	17449428	A // B	- // T	N/A	-	-	ABCC8	PA24395	NM_000352.3|NP_000343.2|-|I|701|coding-nonsynonymous|T|X|701	GGAGGGGCATGCTGGAGGGGTGGACTGGGCCATACCTCGGGGGATACGAA[-/A]TGGTGATGTTGGACAGTGTGGGGATTCCATCTGGGGTCCACGTGAAGTAGC
157	AM_10287	ABCC8_c.1891delC(P631X)	rs72559725	in-del	N	11	17450144	A // B	- // C	N/A	-	-	ABCC8	PA24395	NM_000352.3|NP_000343.2|C|P|631|coding-nonsynonymous|-|X|631	GGGAGGCCGGGCACTCACCACCGCCTGGTACTTGCTGGCTGGGCCCTGAG[-/G]TGTGGGCTCATGGGGGGCACACTGCTCCTCACGGATCTCTGCACTGGACA
158	AM_10301	ABCC8_c.742C>T(R248X)	rs72559730	snp	N	11	17483210	A // B	T // C	N/A	-	-	ABCC8	PA24395	NM_000352.3|NP_000343.2|C|R|248|coding-nonsynonymous|T|X|248	TTGGTAGTTGGTGAGGGCCCTCATGGCGATGGGCAGCTTCCCGATGGCTC[A/G]CAAGTCGATGGGCTTCTTGTGGGCAGTCTTGATGAAGGCGTTCATCCACC
159	AM_10321	CHST1_c.-226-5041C>T	rs895729	snp	N	11	45679197	A // B	T // C	N/A	-	-	CHST1	PA26501	NM_003654.4|NP_003645.1||||intron|||	ATCCAAAGACGAGTTTCATGGGACAGTGTCCTAGAGCATCCTTCCATGTG[A/G]GCAGTATGCCAACACACAATCCAACCAGTGCAACCTTCCAGAGGGGTGAG
160	AM_10329	CHST1_4593G>T	rs7129157	snp	N	11	45691619	A // B	T // G	N/A	-	-	CHST1	PA26501	NM_003654.4|NP_003645.1||||intron|||	CTTGGAAGTAGCCACGCCAGGATTTGAACCCCTATCTTGTGACCCCGTCC[A/C]CTGCACAATACACCTGCTGCCCAAACTGCCCCAGCCACCCCAGGGTTCTT
161	AM_10330	CHST1_8336G>A	rs2028985	snp	N	11	45695362	A // B	G // A	N/A	-	-	CHST1	PA26501	NM_003654.4|NP_003645.1||||intron|||	CCCAGGCCTGGTCATGAGGAAGATCCCAGGTCCAGAGGCATACCGAAAGT[C/T]AACAGTCAGGCAATGAGTGCAGCGAGAGGCAGCCTACTAGAGGAATCCAA
162	AM_10331	CHST1_9127C>T	rs9787901	snp	N	11	45696153	A // B	T // C	N/A	-	-	CHST1	PA26501	NM_003654.4|NP_003645.1||||intron|||	TTGAGCAAATCACTGAGCCTCTGAGCCGTATCTGTGCAGATCCCATGGAC[A/G]TCCACGCCTGCACTCTCTGTGGACTCTCTGTGGACTCTGGTGGTGGCAGC
163	AM_10332	CHST1_9947T>C	rs750397	snp	N	11	45696973	A // B	T // C	N/A	-	-	CHST1	PA26501	NM_003654.4|NP_003645.1||||intron|||	CACCCCTACCCATGCCCCCACTCAAATCTGAACCAGAAATGCTGCCTCCA[A/G]AAGGCCCCTGTAATGACTCATCCATCCAACAAGCACCACTGAGTGCCCCA
164	AM_10333	CHST1_10046G>C	rs750398	snp	N	11	45697072	A // B	G // C	N/A	-	-	CHST1	PA26501	NM_003654.4|NP_003645.1||||intron|||	CACCTCTGCCAGGTTCTCACTGGACCTAAGCATCCTGCAGAGCCTGAGAA[C/G]AAAATGAGGACTCTGGAAGGTTGGGGACACCAACCAGCCCATCTCCTAGG
165	AM_10335	SLC22A6_c.1361G>A(R454Q)	rs11568634	snp	N	11	62746960	A // B	G // A	N/A	-	-	SLC22A6	PA388	NM_153276.1|NP_695008.1|G|R|454|coding-nonsynonymous|A|Q|454	TGTCTTTCCCCAGGAAAAGGCTGTCATTCTCCCATTAGGCTCCCACTCAC[C/T]GGATCATTGTGGGATACAGTTCCCCAGTATACAGGAAGATGCAGTTGAAG
166	AM_10337	SLC22A6_c.877C>T(R293W)	rs45607933	snp	N	11	62748776	A // B	C // T	N/A	-	-	SLC22A6	PA388	NM_153276.1|NP_695008.1|C|R|293|coding-nonsynonymous|T|W|293	CCTCCTCCGGGAGGCTGGACCTCACCCTGAGGGCCCTGCAGAGAGTCGCC[C/T]GGATCAATGGGAAGCGGGAAGAAGGAGCCAAATTGAGTATGGAGGTGAGA
167	AM_10339	SLC22A6_c.767C>T(A256V)	rs11568624	snp	N	11	62749344	A // B	C // T	N/A	-	-	SLC22A6	PA388	NM_153276.1|NP_695008.1|C|A|256|coding-nonsynonymous|T|V|256	TGTGGCCTACGCTGTGCCCCACTGGCGCCACCTGCAGCTACTGGTCTCTG[C/T]GCCTTTTTTTGCCTTCTTCATCTACTCCTGGTGCGTGGGGCCTAGGGTTG
168	AM_10340	SLC22A6_c.677T>C(I226T)	rs11568623	snp	N	11	62749434	A // B	T // C	N/A	-	-	SLC22A6	PA388	NM_153276.1|NP_695008.1|T|I|226|coding-nonsynonymous|C|T|226	CGTAGGCCACACCAGCCAGGAGGAACTGGCCCAGGCTGTAGACATAGCCA[A/G]TCAAGGTGCCCACGCAGGCCCGTGTGTGAATGGGCATCCACTCCACATCT
169	AM_10346	SLC22A6_c.169delC(L57X)	rs67264610	in-del	Y	11	62751994	A // B	- // C	N/A	-	-	SLC22A6	PA388	NM_153276.1|NP_695008.1|C|L|57|coding-nonsynonymous|-|X|57	TCACTGCTGCCATCCCTACCCACCACTGCCGCCCGCCTGCCGATGCCAAC[-/C]TCAGCAAGAACGGGGGGCTGGAGGTCTGGCTGCCCCGGGACAGGCAGGGG
170	AM_10347	SLC22A6_c.149G>A(R50H)	rs11568626	snp	Y	11	62752014	A // B	A // G	N/A	-	-	SLC22A6	PA388	NM_153276.1|NP_695008.1|G|R|50|coding-nonsynonymous|A|H|50	TCACAACACCCTGCAGAACTTCACTGCTGCCATCCCTACCCACCACTGCC[A/G]CCCGCCTGCCGATGCCAACCTCAGCAAGAACGGGGGGCTGGAGGTCTGGC
171	AM_10348	SLC22A6_c.40G>A(G14S)	rs72559735	snp	N	11	62752123	A // B	G // A	N/A	-	-	SLC22A6	PA388	NM_153276.1|NP_695008.1|G|G|14|coding-nonsynonymous|A|S|14	CAGGAGCAGGGGGAGGACCACCAGGGTGACCTGGATCTGCTGGAAGCGGC[C/T]GACACCCCCCACCTGCTGCAGGAGGTCATTAAAGGCCATTGGGCCAGGCC
172	AM_10353	SLC22A8_c.1342G>A(V448I)	rs11568486	snp	N	11	62761083	A // B	A // G	N/A	-	-	SLC22A8	PA389	NM_004254.2|NP_004245.2|G|V|448|coding-nonsynonymous|A|I|448	ACAGGCTACCAATCCCTACTCTGAACCCTCGCAGGCAAACAGGTATGGGC[A/G]TAAGTAACCTGTGGACCCGCGTGGGAAGCATGGTGTCCCCGCTGGTGAAA
173	AM_10354	SLC22A8_c.1195G>T(A399S)	rs11568497	snp	N	11	62762035	A // B	G // T	N/A	-	-	SLC22A8	PA389	NM_004254.2|NP_004245.2|G|A|399|coding-nonsynonymous|T|S|399	GGCATACCACTCAGGCCGCTGCCCTGCTCCTGGCAGGAGGGGCCATCTTG[G/T]CTCTCACCTTTGTGCCCTTGGGTGAGAGACTGGGGCTACCCCAGAACCCT
174	AM_10356	SLC22A8_c.929C>T(A310V)	rs11568481	snp	N	11	62763248	A // B	T // C	N/A	-	-	SLC22A8	PA389	NM_004254.2|NP_004245.2|C|A|310|coding-nonsynonymous|T|V|310	TCATGCGGCGCAGCATGGGTATCCGGAACAGGTCACTTGCGGTGTACTTG[A/G]CCTTGGCCAAGGAGATCTCCTTCTGCAGGTTGAGTTTGAGCTCCTTCGGG
175	AM_10357	SLC22A8_c.913A>T(I305F)	rs11568482	snp	N	11	62763264	A // B	T // A	N/A	-	-	SLC22A8	PA389	NM_004254.2|NP_004245.2|A|I|305|coding-nonsynonymous|T|F|305	GGGTATCCGGAACAGGTCACTTGCGGTGTACTTGGCCTTGGCCAAGGAGA[A/T]CTCCTTCTGCAGGTTGAGTTTGAGCTCCTTCGGGCAGAGGAGGGGGAGGG
176	AM_10358	SLC22A8_c.842T>C(V281A)	rs45438191	snp	N	11	62763544	A // B	T // C	N/A	-	-	SLC22A8	PA389	NM_004254.2|NP_004245.2|T|V|281|coding-nonsynonymous|C|A|281	CCCCTACCTCCAAGCTGAGCCTTTCTCCCTCTTCCTTCTTGCCATTGAAG[A/G]CAGCCACCCGCCGGAGTATCTTCAGGGCCTTCGAGGACTTTCCAGACAAG
177	AM_10359	SLC22A8_c.829C>T(R277W)	rs11568492	snp	N	11	62763557	A // B	C // T	N/A	-	-	SLC22A8	PA389	NM_004254.2|NP_004245.2|C|R|277|coding-nonsynonymous|T|W|277	TACGCTGGTTGGTCTTGTCTGGAAAGTCCTCGAAGGCCCTGAAGATACTC[C/T]GGCGGGTGGCTGTCTTCAATGGCAAGAAGGAAGAGGGAGAAAGGCTCAGC
178	AM_10360	SLC22A8_c.779T>G(I260R)	rs11568493	snp	N	11	62763607	A // B	G // T	N/A	-	-	SLC22A8	PA389	NM_004254.2|NP_004245.2|T|I|260|coding-nonsynonymous|G|R|260	GAGGAGCCACTGTGACTGGTCTCTGGCCCCCAGGTGGACACCAGAGTCCA[G/T]ACGCTGGTTGGTCTTGTCTGGAAAGTCCTCGAAGGCCCTGAAGATACTCC
179	AM_10361	SLC22A8_c.723T>A(T241T)	rs2276299	snp	N	11	62766431	A // B	T // A	N/A	-	-	SLC22A8	PA389	NM_004254.2|NP_004245.2|T|T|241|coding-synonymous|A|T|241	AGGGCCACATACCAGGATGATAGGAAGAAGACGAAGAAGGGAATGGACAC[A/T]GTTAACTGCAGCCAACGCCACTGGGGGATGGCGTAGGCCAGGCCGGGCAG
180	AM_10362	SLC22A8_c.715C>T(Q239X)	rs11568496	snp	N	11	62766439	A // B	C // T	N/A	-	-	SLC22A8	PA389	NM_004254.2|NP_004245.2|C|Q|239|coding-nonsynonymous|T|X|239	AGTTCATTCTGCCCGGCCTGGCCTACGCCATCCCCCAGTGGCGTTGGCTG[C/T]AGTTAACTGTGTCCATTCCCTTCTTCGTCTTCTTCCTATCATCCTGGTAT
181	AM_10364	SLC22A8_c.445C>A(R149S)	rs45566039	snp	N	11	62767307	A // B	A // C	N/A	-	-	SLC22A8	PA389	NM_004254.2|NP_004245.2|C|R|149|coding-nonsynonymous|A|S|149	CACACTGTGGCTAACCTGGCCCCTCCTCTCCTTCGAGCTACAGGTTTGGC[A/C]GCAGGCCCATCCTGACCTGCAGCTACCTGCTGCTGGCAGCCAGCGGCTCC
182	AM_10365	SLC22A8_c.387C>A(F129L)	rs11568479	snp	N	11	62768242	A // B	C // A	N/A	-	-	SLC22A8	PA389	NM_004254.2|NP_004245.2|C|F|129|coding-nonsynonymous|A|L|129	CTGTCAGACAGGTCTCCAAGCACGAGCCCTCCAATCAGTATACCTGCCAT[G/T]AAGATAGACTGGGCCATCTCCTTCAGTTTGTTGGAGTTGCACACCAAGTC
183	AM_10378	SLC22A11_c.86T>C(L29P)	rs11231819	snp	N	11	64323557	A // B	C // T	N/A	+	+	SLC22A11	PA38295	NM_018484.2|NP_060954.1|T|L|29|coding-nonsynonymous|C|P|29	CGTGGGCCTCTTCCAGACCCTGCAGGTGCTCACCTTCATCCTCCCCTGCC[C/T]CATGATACCTTCCCAGATGCTCCTGGAGAACTTCTCAGCCGCCATCCCAG
184	AM_10379	SLC22A11_c.91A>G(I31V)	rs11231820	snp	N	11	64323562	A // B	A // G	N/A	+	+	SLC22A11	PA38295	NM_018484.2|NP_060954.1|A|I|31|coding-nonsynonymous|G|V|31	GCCTCTTCCAGACCCTGCAGGTGCTCACCTTCATCCTCCCCTGCCTCATG[A/G]TACCTTCCCAGATGCTCCTGGAGAACTTCTCAGCCGCCATCCCAGGCCAC
185	AM_10384	SLC22A11_c.464T>G(V155G)	rs12785832	snp	N	11	64326677	A // B	G // T	N/A	+	+	SLC22A11	PA38295	NM_018484.2|NP_060954.1|T|V|155|coding-nonsynonymous|G|G|155	CCAGGGCTTGAAGCCCCTAAGCCAGTCCATCTTCATGTCCGGGATCCTGG[G/T]GGGCTCCTTTATCTGGGGCCTCCTCTCCTACCGGTGAGTGCCTCCGCTCC
186	AM_10388	SLC22A11_c.612T>G(A204A)	rs34525500	snp	N	11	64329590	A // B	T // G	N/A	+	+	SLC22A11	PA38295	NM_018484.2|NP_060954.1|T|A|204|coding-synonymous|G|A|204	GGGGACTCACTCAGTGTCAGTGAACTCAGAAAGATGCCGGCCATCCCAAA[A/C]GCGGCCACGAACCGCAGGCCGCAGTAGATGACGAATGTTGGGGCGAAGAT
187	AM_10389	SLC22A11_c.1058+487G>A	rs1783811	snp	N	11	64333296	A // B	A // G	N/A	+	+	SLC22A11	PA38295	NM_018484.2|NP_060954.1||||intron|||	ACTTCACTGATGGGGAAAGAGGATCCCAGAGGGGTAAGGAACAAGCCCAA[A/G]ATAATAGAGCCTGCATTGGAACCGGGCTGAGCTAACACTTGGCTTACCGG
188	AM_10390	SLC22A11_c.1059-957C>T	rs2078267	snp	N	11	64334114	A // B	C // T	N/A	+	+	SLC22A11	PA38295	NM_018484.2|NP_060954.1||||intron|||	TTCCTGTCTTGTTAACCCAGTTGTTATCTGTCCAAGGCTCCAGTGTCGGC[C/T]GCTTTGAGCACCAGCCCAGTGACTCTCACGTCACTCACATAAACTTCATG
189	AM_10396	SLC22A12_c.51G>A(Q17Q)	rs72559738	snp	N	11	64359079	A // B	A // G	N/A	+	+	SLC22A12	PA38478	NM_144585.2|NP_653186.2|G|Q|17|coding-synonymous|A|Q|17	ATGGCATTTTCTGAACTCCTGGACCTCGTGGGTGGCCTGGGCAGGTTCCA[A/G]GTTCTCCAGACGATGGCTCTGATGGTCTCCATCATGTGGCTGTGTACCCA
190	AM_10401	SLC22A12_c.426T>C(H142H)	rs11231825	snp	N	11	64360274	A // B	C // T	N/A	+	+	SLC22A12	PA38478	NM_144585.2|NP_653186.2|T|H|142|coding-synonymous|C|H|142	GAGCTCAGCCTCCTCCTCTCCCATCAGTGGAACCTCGTGTGTGACTCTCA[C/T]GCTCTGAAGCCCATGGCCCAGTCCATCTACCTGGCTGGGATTCTGGTGGG
191	AM_10409	SLC29A2_c.1233G>A(V411V)	rs8187659	snp	N	11	66131722	A // B	A // G	N/A	-	-	SLC29A2	PA191	NM_001532.2|NP_001523.2|G|V|411|coding-synonymous|A|V|411	TACTTCATCACCTTCATGCTGCTCTTTGCCGTTTCTAATGGCTACCTGGT[A/G]TCCCTCACCATGTGCCTGGCGCCCAGGTCCGGGGCAATGGGGTGGGGTGG
192	AM_10410	SLC29A2_c.927C>T(P309P)	rs8187661	snp	N	11	66133643	A // B	C // T	N/A	-	-	SLC29A2	PA191	NM_001532.2|NP_001523.2|C|P|309|coding-synonymous|T|P|309	ACAGCGCTGTGCCTTGTGTTGGTCTTCACAGTCACCCTGTCCGTCTTCCC[C/T]GCCATCACAGCCATGGTGACCAGCTCCACCAGTCCTGGGAAGTGGAGTGA
193	AM_10412	SLC29A2_c.551_556del6(SGV186X)	rs8187649	in-del	N	11	66135335	A // B	- // GTGGCG	N/A	-	-	SLC29A2	PA191	NM_001532.2|NP_001523.2|||||||	GGCGGGACCAGGTGCCTCTCTTCTGCAGCTGAAGTTCCTCCGCAG[-/GTGGCG]TGGACGCCGAGACCTCTGCCCTGGGGTACTTTATCACGCCCTGTGTGGGC
194	AM_10417	SLC29A2_c.288G>A(T96T)	rs8187647	snp	N	11	66136658	A // B	G // A	N/A	-	-	SLC29A2	PA191	NM_001532.2|NP_001523.2|G|T|96|coding-synonymous|A|T|96	GTCAGGGCAAAGAGCAGCAGTATGGCCAGCAGGCTGCCCAGAATGCGCAC[C/T]GTCTCCGGGACGCTGCTCAGAAGCAGGCAGAGTGCATCAGTGGGGCCCAG
195	AM_10418	SLC29A2_c.204C>A(N68K)	rs8187644	snp	N	11	66136911	A // B	A // C	N/A	-	-	SLC29A2	PA191	NM_001532.2|NP_001523.2|C|N|68|coding-nonsynonymous|A|K|68	AGGATCCTGAGCACCAACCACACGGGTCCCGAGGATGCCTTCAACTTCAA[A/C]AATTGGGTGACGCTGCTGTCCCAGCTGCCCCTGCTGCTCTTCACCCTCCT
196	AM_10419	SLC29A2_c.177G>A(T59T)	rs8187645	snp	N	11	66136938	A // B	G // A	N/A	-	-	SLC29A2	PA191	NM_001532.2|NP_001523.2|G|T|59|coding-synonymous|A|T|59	TGGGACAGCAGCGTCACCCAATTGTTGAAGTTGAAGGCATCCTCGGGACC[C/T]GTGTGGTTGGTGCTCAGGATCCTGGCTGTGCTGTTGCCGGCCCCGGCCAG
197	AM_10430	GSTP1_c.-18G>A(Promoter)	rs8191439	snp	N	11	67351297	A // B	A // G	N/A	+	+	GSTP1	PA29028	NM_000852.3|||||mrna-utr|||	ACCACCCTTATAAGGCTCGGAGGCCGCGAGGCCTTCGCTGGAGTTTCGCC[A/G]CCGCAGTCTTCGCCACCAGTGAGTACGCGCGGCCCGCGTCCCCGGGGATG
198	AM_10434	GSTP1_c.21C>G(V7V)	rs8191444	snp	N	11	67351624	A // B	C // G	N/A	+	+	GSTP1	PA29028	NM_000852.3|NP_000843.1|C|V|7|coding-synonymous|G|V|7	GCTCCAGCAAACTTTTCTTTGTTCGCTGCAGTGCCGCCCTACACCGTGGT[C/G]TATTTCCCAGTTCGAGGTAGGAGCATGTGTCTGGCAGGGAAGGGAGGCAG
199	AM_10440	GSTP1*B_c.313A>G(I105V)	rs1695	snp	N	11	67352689	A // B	A // G	N/A	+	+	GSTP1	PA29028	NM_000852.3|NP_000843.1|A|I|105|coding-nonsynonymous|G|V|105	CCCTGGTGGACATGGTGAATGACGGCGTGGAGGACCTCCGCTGCAAATAC[A/G]TCTCCCTCATCTACACCAACTATGTGAGCATCTGCACCAGGGTTGGGCAC
200	AM_10442	GSTP1*C_c.341C>T(A114V)	rs1138272	snp	N	11	67353579	A // B	C // T	N/A	+	+	GSTP1	PA29028	NM_000852.3|NP_000843.1|C|A|114|coding-nonsynonymous|T|V|114	GGCTGGGAGGGATGAGAGTAGGATGATACATGGTGGTGTCTGGCAGGAGG[C/T]GGGCAAGGATGACTATGTGAAGGCACTGCCCGGGCAACTGAAGCCTTTTG
201	AM_10444	GSTP1_c.439G>T(D147Y)	rs4986949	snp	N	11	67353677	A // B	G // T	N/A	+	+	GSTP1	PA29028	NM_000852.3|NP_000843.1|G|D|147|coding-nonsynonymous|T|Y|147	TTGAGACCCTGCTGTCCCAGAACCAGGGAGGCAAGACCTTCATTGTGGGA[G/T]ACCAGGTGAGCATCTGGCCCCATGCTGTTCCTTCCTCGCCACCCTCTGCT
202	AM_10454	SLCO2B1_c.405G>A(P135P)	rs1109407	snp	N	11	74876951	A // B	A // G	N/A	+	+	SLCO2B1	PA35845	NM_007256.3|NP_009187.1|G|P|135|coding-synonymous|A|P|135	GGCTATGGGGCTATCCTTGTGGCCCTGGCGGGCCTGCTCATGACTCTCCC[A/G]CACTTCATCTCGGAGCCATACCGCTACGACAACACCAGCCCTGGTAAGAG
203	AM_10456	SLCO2B1_c.644A>T(D215V)	rs72559740	snp	N	11	74880413	A // B	T // A	N/A	+	+	SLCO2B1	PA35845	NM_007256.3|NP_009187.1|A|D|215|coding-nonsynonymous|T|V|215	ACTGGTCCTCACCGAGGTAGAGGGGCGAGTTGCTGTTGTGGGCAAAGTCA[A/T]CGATGTAGGAGATGCCAAAGGGCTGAATGGGCACCCCGCCCACGCCCAGC
204	AM_10458	SLCO2B1*2_c.1175C>T(T392I)	rs1621378	snp	N	11	74904362	A // B	T // C	N/A	+	+	SLCO2B1	PA35845	NM_007256.3|NP_009187.1|C|T|392|coding-nonsynonymous|T|I|392	CGTAGGAGGCTGTGATGGAAAACTGGCGCTCCAGGAACTTGGGCAGGAAG[A/G]TGGCCATGCCCGCAGCCATGGATGACAAGCATACCTGGGACAGGACCACC
205	AM_10460	SLCO2B1_c.1434-138G>T	rs2306167	snp	N	11	74907421	A // B	G // T	N/A	+	+	SLCO2B1	PA35845	NM_007256.3|NP_009187.1||||intron|||	CATACTTGCCCACCTTCATTGCAAGGAGCTCACTATCACGCCATCATCGG[G/T]CAGCCCTGATGATGAAAATCCTCTGTGTGGAGCTGAAATCTCTGGCCATT
206	AM_10462	SLCO2B1_c.1512C>T(C504C)	rs59305495	snp	N	11	74907637	A // B	C // T	N/A	+	+	SLCO2B1	PA35845	NM_007256.3|NP_009187.1|C|C|504|coding-synonymous|T|C|504	AGCTGCATGGAGGCCTGCTCCTGCCCATTGGACGGCTTTAACCCTGTCTG[C/T]GACCCCAGCACTCGTGTGGAATACATCACACCCTGCCACGCAGGCTGCTC
207	AM_10470	NNMT_c.-39A>G	rs11557218	snp	N	11	114167240	A // B	A // G	N/A	+	+	NNMT	PA251	NM_006169.2|||||mrna-utr|||	TCAGGAAGACAACTTCTGCAGGGTCACTCCCTGGCTTCTGGAGGAAAGAG[A/G]AGGAGGGCAGTGCTCCAGTGGTACAGAAGTGAGACATAATGGAATCAGGC
208	AM_10471	NNMT_c.66A>G(E22E)	rs1802605	snp	N	11	114167344	A // B	A // G	N/A	+	+	NNMT	PA251	NM_006169.2|NP_006160.1|A|E|22|coding-synonymous|G|E|22	ACCTCCAAGGACACCTATCTAAGCCATTTTAACCCTCGGGATTACCTAGA[A/G]AAATATTACAAGTTTGGTTCTAGGCACTCTGCAGAAAGCCAGATTCTTAA
209	AM_10472	NNMT_c.106C>A(Q36K)	rs1802606	snp	N	11	114167384	A // B	A // C	N/A	+	+	NNMT	PA251	NM_006169.2|NP_006160.1|C|Q|36|coding-nonsynonymous|A|K|36	ATTACCTAGAAAAATATTACAAGTTTGGTTCTAGGCACTCTGCAGAAAGC[A/C]AGATTCTTAAGCACCTTCTGAAAAATCTTTTCAAGATATTCTGCCTAGGT
210	AM_10473	NNMT_c.363-260T>C	rs2852425	snp	N	11	114182507	A // B	T // C	N/A	+	+	NNMT	PA251	NM_006169.2|NP_006160.1||||intron|||	AGTGAATAGTATGTGAAAACGATAATAATACCTAGCAGCCTGCTTCTACC[A/G]TGGACTTCCCTCCATGAAATTATTCTTCCTTCACTGCTTAGTATAGTACT
211	AM_10474	NNMT_c.363-160C>T	rs3741303	snp	N	11	114182607	A // B	T // C	N/A	+	+	NNMT	PA251	NM_006169.2|NP_006160.1||||intron|||	GGCCACCTCTATCGGGAAAGGAGAGAAAGAAGAACTGAGGGGTCATTTTG[A/G]CATTTGAATGAGACCATATTACCCTGAGCTATGTTAAATCTCTTCATAAA
212	AM_10477	NNMT_c.467_468ins2(P156X)	rs72559741	in-del	N	11	114182871	A // B	- // CG	N/A	+	+	NNMT	PA251	NM_006169.2|NP_006160.1|-|P|156|coding-nonsynonymous|CG|X|156	AAGTGTGATGTGACTCAGAGCCAGCCACTGGGGGCCGTCCCCTTACCCCC[-/CG]GGCTGACTGCGTGCTCAGCACACTGTGTCTGGATGCCGCCTGCCCAGACCT
213	AM_10478	NNMT_c.733A>C(T245P)	rs1050207	snp	N	11	114183137	A // B	A // C	N/A	+	+	NNMT	PA251	NM_006169.2|NP_006160.1|A|T|245|coding-nonsynonymous|C|P|245	CTGGCTACACAATCGAATGGTTTGAGGTGATCTCGCAAAGTTATTCTTCC[A/C]CCATGGCCAACAACGAAGGACTTTTCTCCCTGGTGGCGAGGAAGCTGAGC
214	AM_10481	SLCO1B3_c.334G>T(A112S)	rs4149117	snp	N	12	21011480	A // B	G // T	N/A	+	+	SLCO1B3	PA35844	NM_019844.2|NP_062818.1|G|A|112|coding-nonsynonymous|T|S|112	AGTTAATTGGAATTGGTTGTCTCCTTATGGGAACTGGAAGTATTTTGACA[G/T]CTTTACCACATTTCTTCATGGGATAGTAAGTGTTAAACAGCTCTGAGCCA
215	AM_10482	SLCO1B3_c.699A>G(I233M)	rs7311358	snp	N	12	21015760	A // B	A // G	N/A	+	+	SLCO1B3	PA35844	NM_019844.2|NP_062818.1|A|I|233|coding-nonsynonymous|G|M|233	ATGATTGGTCCAGTCATTGGCTTTGCACTGGGATCTCTGTTTGCTAAAAT[A/G]TACGTGGATATTGGATATGTAGATCTGAGTAAGTACAATTAGAACAAGGT
216	AM_10484	SLCO1B3_c.841delA(K281X)	N/A	in-del	N	12	21028282	A // B	- // A	N/A	+	+	SLCO1B3	PA35844	||||||||	TGTCTGGACTATTTTCCATTATTTCTTCCATACCATTTTTTTTCTTGCCG[-/A]AAAATCCAAATAAACCACAAAAAGAAAGAAAAATTTCACTATCATTGCAT
217	AM_10485	SLCO1B3_c.1272A>G(L424L)	rs4149143	snp	N	12	21032506	A // B	A // G	N/A	+	+	SLCO1B3	PA35844	NM_019844.2|NP_062818.1|A|L|424|coding-synonymous|G|L|424	GCCAAATTTTCATTTCTTACTTCGATGATATCCTTCTTGTTTCAACTTCT[A/G]TATTTCCCTCTAATCTGCGAAAGCAAATCAGTTGCCGGCCTAACCTTGAC
218	AM_10487	SLCO1B3_c.1557G>A(A519A)	rs2053098	snp	N	12	21036411	A // B	A // G	N/A	+	+	SLCO1B3	PA35844	NM_019844.2|NP_062818.1|G|A|519|coding-synonymous|A|A|519	AACTGTAGTTGTGTGGAAGTAACTGGTCTCCAGAACAGAAATTACTCAGC[A/G]CACTTGGGTGAATGCCCAAGAGATAATACTTGTACAAGGAAATTTTTCAT
219	AM_10490	SLCO1B3_c.1833A>G(G611G)	rs3764006	snp	N	12	21054369	A // B	G // A	N/A	+	+	SLCO1B3	PA35844	NM_019844.2|NP_062818.1|A|G|611|coding-synonymous|G|G|611	GTGTTTACGACAACTTACCCAAAAAATACGGAATTATATATCCTACAAGC[C/T]CCTTGTGCTCCACAGCTGTTGGTGGACCACTTCATACATGTTTTATCAAT
220	AM_10492	SLCO1B3_c.2083insC	rs72559744	in-del	N	12	21069155	A // B	- // C	N/A	+	+	SLCO1B3	PA35844	||||||||	ACATTTTGTACCTTCTGCTGGAACAGATAGTAAAACATGTAATTTGGACA[-/C]TGCAAGACAATGCTGCTGCCAACTAACATTGCATTGATTCATTAAGATGTT
221	AM_10493	SLCO1B1*17_c.-11187G>A(Promoter)	rs4149015	snp	N	12	21283322	A // B	A // G	N/A	+	+	SLCO1B1	PA134865839	NM_006446.3|NP_006437.2||||locus-region|||	TATATGCATCCTCACATTACCACATATATATATGTGCATATGTGTATACA[A/G]GTAAAAGTGTGTATATATGTATACATGTATGTTTGTGTGTATATACATAC
222	AM_10494	SLCO1B1*2_c.217T>C(F73L)	rs56101265	snp	N	12	21325716	A // B	C // T	N/A	+	+	SLCO1B1	PA134865839	NM_006446.3|NP_006437.2|T|F|73|coding-nonsynonymous|C|L|73	AACGGAGATTTGAGATATCCTCTTCTCTTGTTGGTTTTATTGACGGAAGC[C/T]TTGAAATTGGTAACATTTATTTTCTATTTTAATAACCAAACTTGCAAAGT
223	AM_10495	SLCO1B1_c.245T>C(V82A)	rs56061388	snp	N	12	21327529	A // B	C // T	N/A	+	+	SLCO1B1	PA134865839	NM_006446.3|NP_006437.2|T|V|82|coding-nonsynonymous|C|A|82	GCTGTATCAACATAATTTTGTTCCCTTTCTAGGAAATTTGCTTGTGATTG[C/T]ATTTGTGAGTTACTTTGGATCCAAACTACATAGACCAAAGTTAATTGGAA
224	AM_10496	SLCO1B1*1B_c.388A>G(N130D)	rs2306283	snp	N	12	21329738	A // B	G // A	N/A	+	+	SLCO1B1	PA134865839	NM_006446.3|NP_006437.2|A|N|130|coding-nonsynonymous|G|D|130	TTGATTAATTAAACAAGTGGATAAGGTCGATGTTGAATTTTCTGATGAAT[C/T]GATATTAGTTTCTTTAGAATACCTGTAACTGTAAGAACATCACTGAATTA
225	AM_10497	SLCO1B1*16_c.452A>G(N151S)	rs2306282	snp	N	12	21329802	A // B	A // G	N/A	+	+	SLCO1B1	PA134865839	NM_006446.3|NP_006437.2|A|N|151|coding-nonsynonymous|G|S|151	TTCAACATCGACCTTATCCACTTGTTTAATTAATCAAATTTTATCACTCA[A/G]TAGAGCATCACCTGAGATAGTGGGAAAAGGTAAGAATTAATATTGACAGT
226	AM_10498	SLCO1B1*4_c.463C>A(P155T)	rs11045819	snp	N	12	21329813	A // B	A // C	N/A	+	+	SLCO1B1	PA134865839	NM_006446.3|NP_006437.2|C|P|155|coding-nonsynonymous|A|T|155	CCTTATCCACTTGTTTAATTAATCAAATTTTATCACTCAATAGAGCATCA[A/C]CTGAGATAGTGGGAAAAGGTAAGAATTAATATTGACAGTAAAAAGTCTTC
227	AM_10499	SLCO1B1*3_c.467A>G(E156G)	rs72559745	snp	N	12	21329817	A // B	A // G	N/A	+	+	SLCO1B1	PA134865839	NM_006446.3|NP_006437.2|A|E|156|coding-nonsynonymous|G|G|156	ATCCACTTGTTTAATTAATCAAATTTTATCACTCAATAGAGCATCACCTG[A/G]GATAGTGGGAAAAGGTAAGAATTAATATTGACAGTAAAAAGTCTTCTAAA
228	AM_10500	SLCO1B1*5_c.521T>C(V174A)	rs4149056	snp	N	12	21331549	A // B	C // T	N/A	+	+	SLCO1B1	PA134865839	NM_006446.3|NP_006437.2|T|V|174|coding-nonsynonymous|C|A|174	TATCTACATAGGTTGTTTAAAGGAATCTGGGTCATACATGTGGATATATG[C/T]GTTCATGGGTAATATGCTTCGTGGAATAGGGGAGACTCCCATAGTACCAT
229	AM_10501	SLCO1B1_c.571T>C(L191L)	rs4149057	snp	N	12	21331599	A // B	T // C	N/A	+	+	SLCO1B1	PA134865839	NM_006446.3|NP_006437.2|T|L|191|coding-synonymous|C|L|191	CAAAGAAGAATGTCCTTCTTTAGCGAAATCATCAATGTAAGAAAGCCCCA[A/G]TGGTACTATGGGAGTCTCCCCTATTCCACGAAGCATATTACCCATGAACA
230	AM_10502	SLCO1B1*18_c.578T>G(L193R)	rs72559746	snp	N	12	21331606	A // B	T // G	N/A	+	+	SLCO1B1	PA134865839	NM_006446.3|NP_006437.2|T|L|193|coding-nonsynonymous|G|R|193	CTAAATACAAAGAAGAATGTCCTTCTTTAGCGAAATCATCAATGTAAGAA[A/C]GCCCCAATGGTACTATGGGAGTCTCCCCTATTCCACGAAGCATATTACCC
231	AM_10503	SLCO1B1_c.597C>T(F199F)	rs2291075	snp	N	12	21331625	A // B	C // T	N/A	+	+	SLCO1B1	PA134865839	NM_006446.3|NP_006437.2|C|F|199|coding-synonymous|T|F|199	ATAGGGGAGACTCCCATAGTACCATTGGGGCTTTCTTACATTGATGATTT[C/T]GCTAAAGAAGGACATTCTTCTTTGTATTTAGGTAATGTACACAAAATATT
232	AM_10508	SLCO1B1_c.1007C>G(P336R)	rs72559747	snp	N	12	21353478	A // B	C // G	N/A	+	+	SLCO1B1	PA134865839	NM_006446.3|NP_006437.2|C|P|336|coding-nonsynonymous|G|R|336	TTACAATTTTACAGGTTTTTTCCAGTCTTTTAAAAGCATCCTTACTAATC[C/G]CCTGTATGTTATGTTTGTGCTTTTGACGTTGTTACAAGTAAGCAGCTATA
233	AM_10509	SLCO1B1*6_c.1058T>C(I353T)	rs55901008	snp	N	12	21353529	A // B	T // C	N/A	+	+	SLCO1B1	PA134865839	NM_006446.3|NP_006437.2|T|I|353|coding-nonsynonymous|C|T|353	GCTGACCATACTGTTGCTCTACGTATTTGAAGACATAAGTAAAAGCACCA[A/G]TATAGCTGCTTACTTGTAACAACGTCAAAAGCACAAACATAACATACAGG
234	AM_10512	SLCO1B1*7_c.1294A>G(N432D)	rs56387224	snp	N	12	21355583	A // B	A // G	N/A	+	+	SLCO1B1	PA134865839	NM_006446.3|NP_006437.2|A|N|432||||432	CTGTGATGTCATTGTCCTTTTACCTATTATATTTTTTCATACTCTGTGAA[A/G]ACAAATCAGTTGCCGGACTAACCATGACCTATGATGGGTTTGTATATATC
235	AM_10513	SLCO1B1*8_c.1385A>G(D462G)	rs72559748	snp	N	12	21358855	A // B	A // G	N/A	+	+	SLCO1B1	PA134865839	NM_006446.3|NP_006437.2|A|D|462|coding-nonsynonymous|G|G|462	TAATCCAGTGACATCTCATAGAGATGTACCACTTTCTTATTGCAACTCAG[A/G]CTGCAATTGTGATGAAAGTCAATGGGAACCAGTCTGTGGAAACAATGGAA
236	AM_10514	SLCO1B1*9_c.1463G>C(G488A)	rs59502379	snp	N	12	21358933	A // B	C // G	N/A	+	+	SLCO1B1	PA134865839	NM_006446.3|NP_006437.2|G|G|488|coding-nonsynonymous|C|A|488	ACCAGTCTGTGGAAACAATGGAATAACTTACATCTCACCCTGTCTAGCAG[C/G]TTGCAAATCTTCAAGTGGCAATAAAAAGCCTATAGTGAGTATTAGTTTTT
237	AM_10516	SLCO1B1*10_c.1964A>G(D655G)	rs56199088	snp	N	12	21392011	A // B	A // G	N/A	+	+	SLCO1B1	PA134865839	NM_006446.3|NP_006437.2|A|D|655||||655	TTTATATATTATATTAATTTATGCCATGAAGAAAAAATATCAAGAGAAAG[A/G]TATCAATGCATCAGAAAATGGAAGTGTCATGGATGAAGCAAACTTAGAAT
238	AM_10517	SLCO1B1*11_c.2000A>G(E667G)	rs55737008	snp	N	12	21392047	A // B	A // G	N/A	+	+	SLCO1B1	PA134865839	NM_006446.3|NP_006437.2|A|E|667|coding-nonsynonymous|G|G|667	ATATCAAGAGAAAGATATCAATGCATCAGAAAATGGAAGTGTCATGGATG[A/G]AGCAAACTTAGAATCCTTAAATAAAAATAAACATTTTGTCCCTTCTGCTG
239	AM_10518	SLCO1A2_c.2003C>G(T668S)	rs11568557	snp	N	12	21422492	A // B	C // G	N/A	-	-	SLCO1A2	PA328	NM_021094.3|NP_066580.1|C|T|668|coding-nonsynonymous|G|S|668	CAAAGATATATACCAAAAGTCCACGGTTTTGAAAGATGATGAATTGAAAA[C/G]TAAATTGTAATTGTCCTATTATATTACTTTTTTCAGAATTAGAGAACATG
240	AM_10524	SLCO1A2_c.1063A>G(I355V)	rs45628437	snp	N	12	21450350	A // B	A // G	N/A	-	-	SLCO1A2	PA328	NM_021094.3|NP_066580.1|A|I|355|coding-nonsynonymous|G|V|355	TCATGCCTAAATACCTAGAACAGCAATATGGAATATCATCTTCAGATGCA[A/G]TCTTTCTAATGGGTATGTTTGTTTTTCTCTGCCTTACTAGCACACTTTCC
241	AM_10525	SLCO1A2_c.968T>C(L323P)	rs11568579	snp	N	12	21450445	A // B	C // T	N/A	-	-	SLCO1A2	PA328	NM_021094.3|NP_066580.1|T|L|323|coding-nonsynonymous|C|P|323	ACCTTTCATGAAAAGTCTTTCCTGCAATCCAATTTATATGCTTTTCATAC[C/T]TGTAAGTGTGATACAGTTCAATGCATTCGTTAACATGATCTCCTTCATGC
242	AM_10526	SLCO1A2_c.841A>G(I281V)	rs11568551	snp	N	12	21453351	A // B	A // G	N/A	-	-	SLCO1A2	PA328	NM_021094.3|NP_066580.1|A|I|281|coding-nonsynonymous|G|V|281	TCTTTTTGCCCAACACACTTCCAAAGGAAGGACTAGAGACTAATGCTGAC[A/G]TCATTAAAAATGAAAATGAAGACAAACAAAAAGAAGAGGTCAAGAAGGAA
243	AM_10527	SLCO1A2_c.833delA(N278X)	rs11568555	in-del	N	12	21453359	A // B	- // A	N/A	-	-	SLCO1A2	PA328	NM_021094.3|NP_066580.1|A|N|278|coding-nonsynonymous|-|X|278	TCCTTTTTTCTTTTTGCCCAACACACTTCCAAAGGAAGGACTAGAGACTA[-/A]TGCTGACATCATTAAAAATGAAAATGAAGACAAACAAAAAGAAGAGGTCA
244	AM_10528	SLCO1A2_c.830C>A(T277N)	rs11568553	snp	N	12	21453362	A // B	A // C	N/A	-	-	SLCO1A2	PA328	NM_021094.3|NP_066580.1|C|T|277||||277	CATTCCTTTTTTCTTTTTGCCCAACACACTTCCAAAGGAAGGACTAGAGA[A/C]TAATGCTGACATCATTAAAAATGAAAATGAAGACAAACAAAAAGAAGAGG
245	AM_10531	SLCO1A2_c.516A>C(E172D)	rs11568563	snp	N	12	21457434	A // B	A // C	N/A	-	-	SLCO1A2	PA328	NM_021094.3|NP_066580.1|A|E|172|coding-nonsynonymous|C|D|172	TTAATGTGGGTGTACGTCCTAGTAGGCAATATTGTACGTGGAATGGGTGA[A/C]ACTCCCATCCTGCCTTTGGGTATTTCCTATATAGAAGATTTTGCCAAATT
246	AM_10532	SLCO1A2_c.502C>T(R168C)	rs11568564	snp	N	12	21457448	A // B	C // T	N/A	-	-	SLCO1A2	PA328	NM_021094.3|NP_066580.1|C|R|168|coding-nonsynonymous|T|C|168	AGGAAGTTAAATCATTAATGTGGGTGTACGTCCTAGTAGGCAATATTGTA[C/T]GTGGAATGGGTGAAACTCCCATCCTGCCTTTGGGTATTTCCTATATAGAA
247	AM_10533	SLCO1A2_c.404A>T(N135I)	rs45502302	snp	N	12	21459854	A // B	A // T	N/A	-	-	SLCO1A2	PA328	NM_021094.3|NP_066580.1|A|N|135|coding-nonsynonymous|T|I|135	AGTTTCAGTTTCAGGCAACTTGTCCTCAAACAGTTTCTTGTGTATGGAAA[A/T]TGGAACCCAGATTTTAAGACCAACGCAGGATCCATCAGGTTGTCTACTTC
248	AM_10534	SLCO1A2_c.382A>T(N128Y)	rs11568567	snp	N	12	21459876	A // B	A // T	N/A	-	-	SLCO1A2	PA328	NM_021094.3|NP_066580.1|A|N|128|coding-nonsynonymous|T|Y|128	ACAGATATGAATATGAATCTACAGTTTCAGTTTCAGGCAACTTGTCCTCA[A/T]ACAGTTTCTTGTGTATGGAAAATGGAACCCAGATTTTAAGACCAACGCAG
249	AM_10536	SLCO1A2_c.61-3234G>A	rs7312628	snp	N	12	21475091	A // B	G // A	N/A	-	-	SLCO1A2	PA328	NM_021094.3|NP_066580.1||||intron|||	AAATATACTGTTTTCATCCATCTGGGCTGCTACAACAAAATACCCTAAGC[C/T]GAGTGGCTTATAAACAACAGAAATGTAATTCTCATAGTTCCAAAGACTGG
250	AM_10537	SLCO1A2_c.61-3770A>G	rs7298982	snp	N	12	21475627	A // B	A // G	N/A	-	-	SLCO1A2	PA328	NM_021094.3|NP_066580.1||||intron|||	GCCTCATTGTACCCTCTTCCCTTTTGGAATTCAGGAAAAAACCAACCAGA[A/G]CTAACATCAACACAGACTTTAAGTCTGACAAGAAACATTTACATCTGTTG
251	AM_10538	SLCO1A2_c.61-4734C>T	rs7484455	snp	N	12	21476591	A // B	T // C	N/A	-	-	SLCO1A2	PA328	NM_021094.3|NP_066580.1||||intron|||	AATACATATCTATCTATCTGCACAGCTCATAACTGGGAGTCTTATATCCA[A/G]AAGGCTTTGTCACAAGGTATCTTTATCCTCTCAGTAGTTATTTTCTTTTA
252	AM_10539	SLCO1A2_c.61-5126T>C	rs4078	snp	N	12	21476983	A // B	C // T	N/A	-	-	SLCO1A2	PA328	NM_021094.3|NP_066580.1||||intron|||	AATACTCTTTTGATTGTCAAAATATTAATGTTATTTATCTCTCCTTGGTT[C/T]ACTTCCAAGGAAACTGGAATGATGGTATTCTCAAGACTAGAGATGCAAAT
253	AM_10540	SLCO1A2_c.61-5605T>A	rs7957203	snp	N	12	21477462	A // B	T // A	N/A	-	-	SLCO1A2	PA328	NM_021094.3|NP_066580.1||||intron|||	ATTCTAGTCAAAGACTTGGTAAAATAATCAGTGTCTCCAATTGTCCTGTT[A/T]TAAAACAAAAGACTCTTACTAAACTTATGCAAATAACTATATTGTCATAA
254	AM_10542	SLCO1A2_c.38T>C(I13T)	rs10841795	snp	N	12	21487544	A // B	T // C	N/A	-	-	SLCO1A2	PA328	NM_021094.3|NP_066580.1|T|I|13|coding-nonsynonymous|C|T|13	CATATATCCACATACAAAAATTCCATACCTTCAACTTGGAAAGACATCTT[A/G]TTCTATGGGTTTCAATTCTTTTCTCAGTTTCTCCCATGTTGCTCTTCAGG
255	AM_10546	ABCC9_c.4537G>A(A1513T)	rs72559751	snp	N	12	21958221	A // B	G // A	N/A	-	-	ABCC9	PA396	NM_005691.2|NP_005682.2|G|A|1513|coding-nonsynonymous|A|T|1513	AGTATCACACTCCACTAAAATACCCTCAGAAAAGACTAAAACAAGGCCTG[C/T]ATCCATAATAGAAGAGACACGGTGCTGGAGAGAAAAATAGAAAAGAAGAG
256	AM_10554	ABCC9_c.1848C>T(D616D)	rs61001398	snp	N	12	22040823	A // B	T // C	N/A	-	-	ABCC9	PA396	NM_005691.2|NP_005682.2|C|D|616|coding-synonymous|T|D|616	TTCTTACAGGACTCAAAAGGAAGCGAACTTTCACCAGTTCGCCAACTGTC[A/G]TCACCAATCTCATCACTCAAGAGAAACTCATTCAGCTTTTGAACACTGCA
257	AM_10555	ABCC9_c.1296C>T(P432P)	rs10770865	snp	N	12	22063115	A // B	C // T	N/A	-	-	ABCC9	PA396	NM_005691.2|NP_005682.2|C|P|432|coding-synonymous|T|P|432	TTAGTCGCCATTGAAACTAATCAACTCATGTGGTTTTTGTTCCTGTGTCC[C/T]AATCTATGGGCTATGCCTGTTCAGGTAGGTAGATAAATATAAGTAAGATT
258	AM_10556	ABCC9_c.1035G>A(K345K)	rs72559752	snp	N	12	22063889	A // B	G // A	N/A	-	-	ABCC9	PA396	NM_005691.2|NP_005682.2|G|K|345|coding-synonymous|A|K|345	AGAGCCAAGAAGAGAAGAACTGCTAGAACGTAAGCGTTTTCAAGAAATTC[C/T]TTTGATGAGAGGGTTTCTGAAATCTGGTCCCCAAAGAAAAAAAGTGTCAT
259	AM_10557	ABCC9_c.789C>T(C263C)	rs58386780	snp	N	12	22068629	A // B	T // C	N/A	-	-	ABCC9	PA396	NM_005691.2|NP_005682.2|C|C|263|coding-synonymous|T|C|263	ATGGAAGACAGACGCTAAATCACCTTTTGTTCTTCATATGCATCTTTCAG[A/G]CAAACATAATTTGTTACTGCTCTCATTGCTATTGGCAATTTTCCAATTGC
260	AM_10558	ABCC9_c.669G>T(L223L)	rs17846788	snp	N	12	22068749	A // B	G // T	N/A	-	-	ABCC9	PA396	NM_005691.2|NP_005682.2|G|L|223|coding-synonymous|T|L|223	GACCTCCAGGATCTGGGAGTGAGATTTCTTCAACCATTTGTGAATTTGCT[G/T]TCAAAAGCAACATACTGGTGGATGAACACACTTATTATATCTGCTCACAA
261	AM_10559	CYP27B1_4315G>A	rs8176351	snp	N	12	58156510	A // B	A // G	N/A	-	-	CYP27B1	PA27099	NM_000785.3|||||mrna-utr|||	AAGCATAAGCTCAGTAACTGTGCATCTGGTCTGTACCTGGTTGGTCCTTC[A/G]TCTTTGCATGTAAGCTCTTTGAGAGGAAGGGTGAAGCCTTATTTGTTTTT
262	AM_10560	CYP27B1_3977G>A	rs8176350	snp	N	12	58156848	A // B	A // G	N/A	-	-	CYP27B1	PA27099	NM_000785.3|||||mrna-utr|||	ACCCTTTCATTCATCATAGGGATAAGATTTTTTGTAGGCACAAGACCAAG[A/G]TATACATCTTCCCCTAATGCCTATCTGACCAAACTGGATAGAACCACCAT
263	AM_10561	CYP27B1_3825G>A(A484A)	rs8176349	snp	N	12	58157000	A // B	G // A	N/A	-	-	CYP27B1	PA27099	NM_000785.3|NP_000776.1|G|A|484|coding-synonymous|A|A|484	ATGCTCCTTTCAGGTACCAGGACAGTCCGGGTCTTGGGTCTAACTGGGGC[C/T]GCACCTGGCTCAGGCTGCACCTCAAAATGTGTTAGGATCTGGAAAGGGAA
264	AM_10563	CYP27B1_2649T>C(V374A)	rs2229103	snp	N	12	58158176	A // B	T // C	N/A	-	-	CYP27B1	PA27099	NM_000785.3|NP_000776.1|T|V|374|coding-nonsynonymous|C|A|374	CATTTCCTCTTGTTCCTCCTCTCCTTCCCCCTCACCTTAGCACTTCCTTG[A/G]CCACCGCCTTCAGCAGGGGCAGCTGGGACAGAACAGTGGCTGAGGGGTAG
265	AM_10564	CYP27B1_2595G>A(S356N)	rs13377933	snp	N	12	58158230	A // B	A // G	N/A	-	-	CYP27B1	PA27099	NM_000785.3|NP_000776.1|G|S|356|coding-nonsynonymous|A|N|356	CCAGACAGCACTCCACTCAGAGATCACAGCTGCCCTGAGCCCTGGCTCCA[A/G]TGCCTACCCCTCAGCCACTGTTCTGTCCCAGCTGCCCCTGCTGAAGGCGG
266	AM_10565	CYP27B1_2532G>C(R335P)	rs28934606	snp	N	12	58158293	A // B	C // G	N/A	-	-	CYP27B1	PA27099	NM_000785.3|NP_000776.1|G|R|335|coding-nonsynonymous|C|P|335	TGTTTTTCAGGTGTCCAACACGCTCTCTTGGGCTCTGTATGAGCTCTCCC[C/G]GCACCCCGAAGTCCAGACAGCACTCCACTCAGAGATCACAGCTGCCCTGA
267	AM_10566	CYP27B1_2267G>A(L314L)	rs8176345	snp	N	12	58158558	A // B	A // G	N/A	-	-	CYP27B1	PA30766	NM_000785.3|NP_000776.1|G|L|314|coding-synonymous|A|L|314	TTCCGGGAAGAGTTGCCTGCCCAGTCCATCCTGGGAAATGTGACAGAGTT[A/G]CTATTGGCGGGAGTGGACACGGTGAGGTTCTCCCTCCGTGCTGTGAGCCG
268	AM_10567	CYP27B1_1652G>C(V166L)	rs8176344	snp	N	12	58159173	A // B	C // G	N/A	-	-	CYP27B1	PA27099	NM_000785.3|NP_000776.1|G|V|166|coding-nonsynonymous|C|L|166	AAGCGGCCGCCCGCTACGCCGGAACCCTGAACAACGTAGTCTGCGACCTT[C/G]TGCGGCGTCTGAGGCGCCAGCGGGGACGTGGCACGGGGCCGCCCGCCCTG
269	AM_10568	CYP27B1_1615C>T(R153R)	rs7965963	snp	N	12	58159210	A // B	T // C	N/A	-	-	CYP27B1	PA30766	NM_000785.3|NP_000776.1|C|R|153|coding-synonymous|T|R|153	CTCAGACGCCGCACAAGGTCGCAGACTACGTTGTTCAGGGTTCCGGCGTA[A/G]CGGGCGGCCGCTTGAGGCCGGAGGAGGAGCGGGGCCAGGAGACTGCGGAG
270	AM_10571	METTL1_c.159C>G(F53L)	rs12823260	snp	N	12	58164992	A // B	G // C	N/A	-	-	METTL1	PA30766	NM_023033.3|NP_075422.3|C|F|53|coding-nonsynonymous|G|L|53	TTCTTATCCTTTGGGTCATCGTGGCTCTGATTTTGAGTGAGTGGAGCGAA[C/G]AACTCTGGGTATAGCTCAGACCAGTCCATCTCCTCTGGCTTCACAGGGCT
271	AM_10572	METTL1_c.77A>G(H26R)	rs11546004	snp	N	12	58165790	A // B	A // G	N/A	-	-	METTL1	PA30766	NM_023033.3|NP_075422.3|A|H|26|coding-nonsynonymous|G|R|26	CGGAGCAGAGGCCCCACCGCCCCAGAAGCGCTACTACCGGCAACGTGCTC[A/G]CTCCAACCCCATGGCGGACCACACGCTGCGCTAGTGAGGAGTGGGCAGAG
272	AM_10573	CHST11_c.*810A>G	rs2468110	snp	N	12	105152391	A // B	G // A	N/A	+	+	CHST11	PA134875681	NM_018413.5|||||mrna-utr|||	TTGTCGAGCTGGATGCTCTATGTCACATAAAGCTTTTTGAGGGCCAAGAC[C/T]ATTGGGTTTGTTCAACGCTCTATCTTCAGGGCCTAGTATATAGTAGATGC
273	AM_10574	CHST11_c.*1379A>G	rs1565814	snp	N	12	105152960	A // B	A // G	N/A	+	+	CHST11	PA134875681	NM_018413.5|||||mrna-utr|||	TTTTTACCCCTCATGAAGGTCAGAGGTGGACTATTTGTACACATACACAC[A/G]TGCACACCCTCTCACGTCCTCCAGAGGCTGAAAGACTATCAGCATCTTGG
274	AM_10575	CHST11_c.*1416T>C	rs2463018	snp	N	12	105152997	A // B	C // T	N/A	+	+	CHST11	PA134875681	NM_018413.5|||||mrna-utr|||	TACACATACACACATGCACACCCTCTCACGTCCTCCAGAGGCTGAAAGAC[C/T]ATCAGCATCTTGGTAACTGCCATGCATGAGCAGCAAGGACAGCCTTCCAT
275	AM_10576	CHST11_c.*1989C>T	rs903247	snp	N	12	105153570	A // B	C // T	N/A	+	+	CHST11	PA134875681	NM_018413.5|||||mrna-utr|||	TCCCCTTTGTGAAGGGCGCAGCAACTATACCCTTGATGGATGGAGATTTA[C/T]GCAATGTGTTTTACTGGGTAGAGTGACAGACCTTGGCTGTCCCTGGAATT
276	AM_10577	CHST11_c.*2506G>A	rs2463437	snp	N	12	105154087	A // B	G // A	N/A	+	+	CHST11	PA134875681	NM_018413.5|||||mrna-utr|||	CCGTGGCAGTATCCAGGATTAGAACCATTGCTTCATTAAATAAAGTACCT[C/T]TGTTGCTATAAACCAGATGGAGACTGTGGTGCTATTTTGTATTTTTTTTT
277	AM_10579	CHST11_c.*4024C>T	rs7847	snp	N	12	105155605	A // B	C // T	N/A	+	+	CHST11	PA134875681	NM_018413.5|||||mrna-utr|||	GCATATGGACATGTAATGTCACATCTTTGTGGAGTGTGATTTTCTTTTTT[C/T]ACATATTTGTATGCAGTAGAGAGCCTGTTGTAGAAAACGCTCCCTGTATC
278	AM_10580	CHST11_c.*4046A>G	rs1048662	snp	N	12	105155627	A // B	A // G	N/A	+	+	CHST11	PA134875681	NM_018413.5|||||mrna-utr|||	ATCTTTGTGGAGTGTGATTTTCTTTTTTCACATATTTGTATGCAGTAGAG[A/G]GCCTGTTGTAGAAAACGCTCCCTGTATCTTGCTGTACTGTTAAAGAAAGC
279	AM_10581	ALDH2_c.-360G>A	rs886205	snp	N	12	112204427	A // B	G // A	N/A	+	+	ALDH2	PA24696	NM_000690.2|||||mrna-utr|||	GTGCCTTTGACCCCAATGTGAACAGGCCCGAGCCAGGGCGACCCTGACCT[C/T]CCCGGCTGATGCTCCAGGTGAAGAGACCGGCCGTAAACCCAAAAGCGAGA
280	AM_10582	ALDH2_c.313C>T(L105L)	rs13306164	snp	N	12	112221055	A // B	T // C	N/A	+	+	ALDH2	PA24696	NM_000690.2|NP_000681.2|C|L|105|coding-synonymous|T|L|105	CACCGCCAGGTAGGTCCGGTCCCGCTCGATCAGATCGGCCAGGCGGTTCA[A/G]CAGCCGGCCCCTGTGTGATGCGTCCATGCGGCGCCAAGGTGAGCCCAGCT
281	AM_10583	ALDH2_c.564G>A(P188P)	rs58280059	snp	N	12	112228249	A // B	A // G	N/A	+	+	ALDH2	PA24696	NM_000690.2|NP_000681.2|G|P|188|coding-synonymous|A|P|188	GGAAGCTTGGATTTCGAGGGCTGCTGTTGTTTGTTGCAGTGGAATTTCCC[A/G]CTCCTGATGCAAGCATGGAAGCTGGGCCCAGCCTTGGCAACTGGAAACGT
282	AM_10584	ALDH2_c.1010A>T(E337V)	rs1062136	snp	N	12	112230513	A // B	A // T	N/A	+	+	ALDH2	PA24696	NM_000690.2|NP_000681.2|A|E|337|coding-nonsynonymous|T|V|337	TGCCGGCTCCCGGACCTTCGTGCAGGAGGACATCTATGATGAGTTTGTGG[A/T]GCGGAGCGTTGCCCGGGCCAAGTCTCGGGTGGTCGGGAACCCCTTTGATA
283	AM_10585	ALDH2_c.1467G>A(G489G)	rs1064933	snp	N	12	112241723	A // B	A // G	N/A	+	+	ALDH2	PA24696	NM_000690.2|NP_000681.2|G|G|489|coding-synonymous|A|G|489	TATGATGTGTTTGGAGCCCAGTCACCCTTTGGTGGCTACAAGATGTCGGG[A/G]AGTGGCCGGGAGTTGGGCGAGTACGGGCTGCAGGCATACACTGAAGTGAA
284	AM_10586	ALDH2_c.1510G>A(E504K)	rs671	snp	N	12	112241766	A // B	G // A	N/A	+	+	ALDH2	PA24696	NM_000690.2|NP_000681.2|G|E|504|coding-nonsynonymous|A|K|504	CCCAACAGGCCCTGAGCCCCCAGCAGGTCCCACACTCACAGTTTTCACTT[C/T]AGTGTATGCCTGCAGCCCGTACTCGCCCAACTCCCGGCCACTCCCCGACA
285	AM_10588	ATP7B_c.*1172G>A	rs1051332	snp	N	13	52507720	A // B	A // G	N/A	-	-	ATP7B	PA73	NM_000053.2|||||mrna-utr|||	CCCAGGGGCTTCAGAAAAGGAGTGGCCACAGCACCCCGAAGGGAGCATCT[A/G]TTTACCTGGCAGTGGCTCTCAGAGCAGCAGAACGGGTTCAGTTTTAGACT
286	AM_10589	ATP7B_c.3620A>G(H1207R)	rs7334118	snp	N	13	52513266	A // B	G // A	N/A	-	-	ATP7B	PA73	NM_000053.2|NP_000044.2|A|H|1207|coding-nonsynonymous|G|R|1207	GGTTGTCCCCCGTGATCAGAACCACGTCCACACCCATGCTCTGCAGCGTG[C/T]GCACAGCCAGGGCAGCCTCCTGCTTGACAGCGTCTGCGATTGCGATCATC
287	AM_10590	ATP7B_c.3419T>C(V1140A)	rs1801249	snp	N	13	52515354	A // B	T // C	N/A	-	-	ATP7B	PA73	NM_000053.2|NP_000044.2|T|V|1140|coding-nonsynonymous|C|A|1140	TGCGCCTCAGCCACTCACGGTTTCCAATCAGCACAGAGAAGGTCTGGGGG[A/G]CTGCATCTATTCAAAAGAGGCTGTGGTTATTTCTAAATGGTCCAATTTCA
288	AM_10591	ATP7B_c.2973G>A(T991T)	rs1801246	snp	N	13	52520507	A // B	A // G	N/A	-	-	ATP7B	PA73	NM_000053.2|NP_000044.2|G|T|991|coding-synonymous|A|T|991	TCCATCACGGTGCTGTGCATTGCCTGCCCCTGCTCCCTGGGGCTGGCCAC[A/G]CCCACGGCTGTCATGGTGGGCACCGGGGTGGCCGCGCAGAACGGCATCCT
289	AM_10592	ATP7B_c.2855G>A(R952K)	rs732774	snp	N	13	52523808	A // B	A // G	N/A	-	-	ATP7B	PA73	NM_000053.2|NP_000044.2|G|R|952|coding-nonsynonymous|A|K|952	GTTGGTGGTATGGATTGTAATCGGTTTTATCGATTTTGGTGTTGTTCAGA[A/G]ATACTTTCCTGTAAGTTGAATGCCTTGGGCTATATGGTGGTTGTGTTTTA
290	AM_10593	ATP7B_c.2495A>G(K832R)	rs1061472	snp	N	13	52524488	A // B	A // G	N/A	-	-	ATP7B	PA73	NM_000053.2|NP_000044.2|A|K|832|coding-nonsynonymous|G|R|832	CAGGGAGGAGCAAGTCCCCATGGAGCTGGTGCAGCGGGGCGATATCGTCA[A/G]GGTGGTCCCTGGGGGAAAGTTTCCAGTGGATGGGAAAGTCCTGGAAGGCA
291	AM_10594	ATP7B_c.2029G>A(E677K)	rs2277447	snp	N	13	52534376	A // B	G // A	N/A	-	-	ATP7B	PA73	NM_000053.2|NP_000044.2|G|E|677|coding-nonsynonymous|A|K|677	GGACAGTCCTGGAATGATGTTGTGGTCCAGGACCATGGACTGGTGGGGCT[C/T]GTTGCTGGGTATCAGCATATAGATCATTAAGGCCATGACAGGGATGCCAA
292	AM_10595	ATP7B_c.1366G>C(V456L)	rs1801244	snp	N	13	52544805	A // B	C // G	N/A	-	-	ATP7B	PA73	NM_000053.2|NP_000044.2|G|V|456|coding-nonsynonymous|C|L|456	ACAGTGCTGGGAATTCCATGGTGCAAACTACAGATGGTACACCTACATCT[C/G]TGCAGGAAGTGGCTCCCCACACTGGGAGGCTCCCTGCAAACCATGCCCCG
293	AM_10596	ATP7B_c.1216T>G(S406A)	rs1801243	snp	N	13	52548140	A // B	G // T	N/A	-	-	ATP7B	PA73	NM_000053.2|NP_000044.2|T|S|406|coding-nonsynonymous|G|A|406	AAATATCGGTGTCTTTGGCCGAAGGGACTGCAACAGTTCTTTATAATCCC[G/T]CTGTAATTAGCCCAGAAGAACTCAGAGCTGCTATAGAAGACATGGGATTT
294	AM_10597	ATP7B_c.-75C>A	rs2277448	snp	N	13	52585548	A // B	C // A	N/A	-	-	ATP7B	PA73	NM_000053.2|||||mrna-utr|||	TCTCTGATCTGGCTCAGAGCAAAAGGTCACCTGGTCGGTGGAGGAGAGCG[G/T]GGTGTTAAAGTCCCGGGAGAGGAGGCGCAGAGTGTGAGGGCATCGGCGCG
295	AM_10598	ABCC4_c.*1564A>T	rs4148555	snp	N	13	95672265	A // B	A // T	N/A	-	-	ABCC4	PA397	NM_005845.3|||||mrna-utr|||	TAAATGTTTATTAATAGTCATGGTTCGTATTTTAGGTGACTGAAATTGCA[A/T]CAGTGATCATAATGAGGTTTGTTAAAACGATAGCTATATTCAAAATGTCT
296	AM_10599	ABCC4_c.*1351T>C	rs1059754	snp	N	13	95672478	A // B	C // T	N/A	-	-	ABCC4	PA397	NM_005845.3|||||mrna-utr|||	GTGTGCATTTGTTTGTATACATATATTTGTCCTTCGTATAGCAAGTTTTT[C/T]GCTCATCAGCAGAGAGCAACAGATGTTTTATTGAGTGAAGCCTTAAAAAG
297	AM_10600	ABCC4_c.*1282T>C	rs4148554	snp	N	13	95672547	A // B	C // T	N/A	-	-	ABCC4	PA397	NM_005845.3|||||mrna-utr|||	AGTCTCATGACCTCTCAGAATAAGGTGTCACCTCCCTGAAATTGCATATA[C/T]GTATATAGACATGCACACGTGTGCATTTGTTTGTATACATATATTTGTCC
298	AM_10601	ABCC4_c.*879T>C	rs1059751	snp	N	13	95672950	A // B	C // T	N/A	-	-	ABCC4	PA397	NM_005845.3|||||mrna-utr|||	ATTATTCTTTTTTGGATTTCTCATTTATGGAAGGCTAACCCTCTGTTGAC[C/T]GTAAGCCTTTTGGTTTGGGCTGTATTGAAATCCTTTCTAAATTGCATGAA
299	AM_10602	ABCC4_c.*694G>A	rs4148553	snp	N	13	95673135	A // B	A // G	N/A	-	-	ABCC4	PA397	NM_005845.3|||||mrna-utr|||	AAATACTACTTTCTCAAAATGGAAGCCCTTAAAGGTGCTTTGATACTGAA[A/G]GACACAAATGTGACCGTCCATCCTCCTTTAGAGTTGCATGACTTGGACAC
300	AM_10603	ABCC4_c.*311G>A	rs4148551	snp	N	13	95673518	A // B	A // G	N/A	-	-	ABCC4	PA397	NM_005845.3|||||mrna-utr|||	GTGCCTTAAGAGACTACAGAGTCAAAGCTCATTTTTAAAGGAGTAGGACA[A/G]AGTTGTCACAGGTTTTTGTTGTTGTTTTTATTGCCCCCAAAATTACATGT
301	AM_10604	ABCC4_c.*38T>G	rs3742106	snp	N	13	95673791	A // B	G // T	N/A	-	-	ABCC4	PA397	NM_005845.3|||||mrna-utr|||	GACAGCACTGTGAATCCAACCAAAATGTCAAGTCCGTTCCGAAGGCATTT[G/T]CCACTAGTTTTTGGACTATGTAAACCACATTGTACTTTTTTTTACTTTGG
302	AM_10611	ABCC4_c.3348A>GorDel(K1116KorX)	rs1751034	snp	N	13	95714976	A // B // C	- // G // A	N/A	-	-	ABCC4	PA397	NM_005845.3|NP_005836.2|A|K|1116|coding-synonymous|G|K|1116	AGGGGCAGGTAAGGACGCTATGACTTGCATACCTGAGGTATGATTGACAT[-/C/T]TTCTTCCTTAAATCGTGAAGTCCAATTTCAGTTGTCAAGATCTTATCAAT
303	AM_10617	ABCC4_c.2844C>T(F948F)	rs1189466	snp	N	13	95726541	A // B	C // T	N/A	-	-	ABCC4	PA397	NM_005845.3|NP_005836.2|C|F|948|coding-synonymous|T|F|948	TTCTCAAATTCAGAGGCTTGGTTCTTGTTTTTGACAACGTCCCGCTGGTT[C/T]GCCGTCCGTCTGGATGCCATCTGTGCCATGTTTGTCATCATCGTTGCCTT
304	AM_10618	ABCC4_c.2712G>A(L904L)	rs1678339	snp	N	13	95727780	A // B	G // A	N/A	-	-	ABCC4	PA397	NM_005845.3|NP_005836.2|G|L|904|coding-synonymous|A|L|904	TCTTCTGCTTTGTATGCCCGGATGGTCCAGAGCCCCTGGAGAGAAGATGA[C/T]AAGTGGGAAAACACTGGACTCCGAGCTGGGGAAACAGACAGAGAAAACAG
305	AM_10622	ABCC4_c.2269G>A(E757K)	rs3765534	snp	N	13	95815415	A // B	G // A	N/A	-	-	ABCC4	PA397	NM_005845.3|NP_005836.2|G|E|757|coding-nonsynonymous|A|K|757	TTAAACTTTACCTGAATAAATTCCTAAGTACCAGTTAAGATCTAGCTTCT[C/T]GGTTACATTTCCTCCTCCATTTACAGTGACATTTAGCATACTTTGTTTGT
306	AM_10624	ABCC4_c.1892delT(L631X)	rs72559753	in-del	N	13	95818554	A // B	- // T	N/A	-	-	ABCC4	PA397	NM_005845.3|NP_005836.2|T|L|631|coding-nonsynonymous|-|X|631	TGGGAGTTCCTGGAACTGGAGGTTGTTCACTTTCCTCATTATCCTTCTTT[-/A]AAAGGGAGCCAAAATCTATACCAGATTTTAGGAACTCAGTGTAAGTCCCC
307	AM_10632	ABCC4_c.969G>A(S323S)	rs2274405	snp	N	13	95858978	A // B	G // A	N/A	-	-	ABCC4	PA397	NM_005845.3|NP_005836.2|G|S|323|coding-synonymous|A|S|323	ACGTAGGTGGTGAAGGTCACAAACACGATGATTTTGCTTGCACTGAAAAA[C/T]GAAGCCAAATTCATCCCTCTGAGGCAGGAACTTCTCAGAATCTTGGAAAT
308	AM_10633	ABCC4_c.951A>G(R317R)	rs2274406	snp	N	13	95858996	A // B	G // A	N/A	-	-	ABCC4	PA397	NM_005845.3|NP_005836.2|A|R|317|coding-synonymous|G|R|317	ACAAACACGATGATTTTGCTTGCACTGAAAAATGAAGCCAAATTCATCCC[C/T]CTGAGGCAGGAACTTCTCAGAATCTTGGAAATCTCCTTCCTGAAAGAGAG
309	AM_10634	ABCC4_c.912G>T(K304N)	rs2274407	snp	N	13	95859035	A // B	G // T	N/A	-	-	ABCC4	PA397	NM_005845.3|NP_005836.2|G|K|304|coding-nonsynonymous|T|N|304	TTTATCTGGTTGACATCACTGCTTTTTTAAAAACCTGTACTCTCTTTCAG[G/T]AAGGAGATTTCCAAGATTCTGAGAAGTTCCTGCCTCAGAGGGATGAATTT
310	AM_10640	ABCC4_c.511T>G(C171G)	rs4148460	snp	N	13	95886884	A // B	G // T	N/A	-	-	ABCC4	PA397	NM_005845.3|NP_005836.2|T|C|171|coding-nonsynonymous|G|G|171	TATATTTTTATCACGTTCAGTGTGCTGGGATGAGGTTACGAGTAGCCATG[G/T]GCCATATGATTTATCGGAAGGTAAGTGACATTCAGCATTAAACATGTACC
311	AM_10641	SLC15A1_c.1848G>A(S616S)	rs8187840	snp	N	13	99338531	A // B	G // A	N/A	-	-	SLC15A1	PA323	NM_005073.3|NP_005064.1|G|S|616|coding-synonymous|A|S|616	ACAATGATGTTGCCAACAGCCACGGTCAGCAGCCATCCTGCCTGAAGCAC[C/T]GACTTCATGTTGGAAGGAGCCTGAGGAAGCAAAGCAAAGTGAGTCCTGCT
312	AM_10642	SLC15A1_c.1757C>T(P586L)	rs56120058	snp	N	13	99339905	A // B	C // T	N/A	-	-	SLC15A1	PA323	NM_005073.3|NP_005064.1|C|P|586||||586	GGTGTTTGAAGATATTTCAGCCAACACAGTTAACATGGCTCTGCAAATCC[C/T]GCAGTATTTTCTTCTCACCTGTGGCGAAGTGGTCTTCTCTGTCACGGGAT
313	AM_10643	SLC15A1_c.1609C>T(P537S)	rs8187830	snp	N	13	99340576	A // B	T // C	N/A	-	-	SLC15A1	PA323	NM_005073.3|NP_005064.1|C|P|537|coding-nonsynonymous|T|S|537	AGCACTACCAAATTCAAGGTAGAAAGTATTGAAATTAGGTTGACATTGTG[A/G]CGGAATCTCTGTTGAGCTTATTGTGAAGCCTTTTCTATCAAAATAAAGAA
314	AM_10644	SLC15A1_c.1527C>T(N509N)	rs8187832	snp	N	13	99340771	A // B	C // T	N/A	-	-	SLC15A1	PA323	NM_005073.3|NP_005064.1|C|N|509|coding-synonymous|T|N|509	ACTTTTAACGAGCTCATCACCATCACAATGAGTGGGAAAGTTTATGCAAA[C/T]ATCAGCAGCTACAATGCCAGCACATACCAGTTTTTTCCTTCTGGCATGTA
315	AM_10645	SLC15A1_c.1446A>G(E482E)	rs8187828	snp	N	13	99354754	A // B	A // G	N/A	-	-	SLC15A1	PA323	NM_005073.3|NP_005064.1|A|E|482|coding-synonymous|G|E|482	CATTACTGTTTTCTCTCTCAGGTAAAGGATGGTCTTAACCAGAAGCCAGA[A/G]AAAGGGGAAAATGGAATCAGGTATGTATATTTCTTTAAAATTTAAGTTTT
316	AM_10647	SLC15A1_c.1375C>T(R459C)	rs2274827	snp	N	13	99356584	A // B	T // C	N/A	-	-	SLC15A1	PA323	NM_005073.3|NP_005064.1|C|R|459|coding-nonsynonymous|T|C|459	CACACTTACCACCTGGTAGTGATTGGGGGCCCACACTAGAAGCGTGTGGC[A/G]TTGGCCCTGCTTGAAGTCGTCAGTTACAGCAGTGACTGGTGATCCAGGAG
317	AM_10648	SLC15A1_c.1352C>A(T451N)	rs8187838	snp	N	13	99356607	A // B	A // C	N/A	-	-	SLC15A1	PA323	NM_005073.3|NP_005064.1|C|T|451|coding-nonsynonymous|A|N|451	ACTGACAAGGATAAACATTTCTTCTCCTGGATCACCAGTCACTGCTGTAA[A/C]TGACGACTTCAAGCAGGGCCAACGCCACACGCTTCTAGTGTGGGCCCCCA
318	AM_10649	SLC15A1_c.1348G>A(V450I)	rs2274828	snp	N	13	99356611	A // B	G // A	N/A	-	-	SLC15A1	PA323	NM_005073.3|NP_005064.1|G|V|450|coding-nonsynonymous|A|I|450	GGCCCACACTAGAAGCGTGTGGCGTTGGCCCTGCTTGAAGTCGTCAGTTA[C/T]AGCAGTGACTGGTGATCCAGGAGAAGAAATGTTTATCCTTGTCAGTTTGT
319	AM_10650	SLC15A1_c.1347T>C(A449A)	rs1339067	snp	N	13	99356612	A // B	C // T	N/A	-	-	SLC15A1	PA323	NM_005073.3|NP_005064.1|T|A|449|coding-synonymous|C|A|449	AACAAACTGACAAGGATAAACATTTCTTCTCCTGGATCACCAGTCACTGC[C/T]GTAACTGACGACTTCAAGCAGGGCCAACGCCACACGCTTCTAGTGTGGGC
320	AM_10651	SLC15A1_c.1321insT	rs72547504	in-del	N	13	99356637	A // B	- // T	N/A	-	-	SLC15A1	PA323	||||||||	GCCCTGCTTGAAGTCGTCAGTTACAGCAGTGACTGGTGATCCAGGAGAAG[-/A]AAATGTTTATCCTTGTCAGTTTGTTTACATCAAAAGTCATAAATGCATTTG
321	AM_10652	SLC15A1_c.1256G>C(G419A)	rs4646227	snp	N	13	99358401	A // B	C // G	N/A	-	-	SLC15A1	PA323	NM_005073.3|NP_005064.1|G|G|419|coding-nonsynonymous|C|A|419	AGGAAACAATACCATGAATATATCTCTTCCTGGAGAGATGGTGACACTTG[C/G]CCCAATGTCTCAAGTAAGTAGAAGGAAATTGCTGCCTTCTTTTTCATCTT
322	AM_10653	SLC15A1_c.1179C>T(N393N)	rs8187836	snp	N	13	99358478	A // B	C // T	N/A	-	-	SLC15A1	PA323	NM_005073.3|NP_005064.1|C|N|393|coding-synonymous|T|N|393	ATTTTCTTTTATTTTGCTCAGAAAACTCTTCCAGTCTTCCCCAAAGGAAA[C/T]GAAGTCCAAATTAAAGTTTTGAATATAGGAAACAATACCATGAATATATC
323	AM_10658	SLC15A1_c.351C>A(S117R)	rs8187821	snp	N	13	99376180	A // B	C // A	N/A	-	-	SLC15A1	PA323	NM_005073.3|NP_005064.1|C|S|117|coding-nonsynonymous|A|R|117	GGAGGGTGATGGGGGCAGCAGTGAGCACCAACTCACACGTGCACAGGAAG[G/T]CTGTCGGGGGTGCCATCATGGTTGTGGTCTGTGAGGTCATTAATGGAGCT
324	AM_10659	SLC15A1_c.350G>A(S117N)	rs2297322	snp	N	13	99376181	A // B	A // G	N/A	-	-	SLC15A1	PA323	NM_005073.3|NP_005064.1|G|S|117|coding-nonsynonymous|A|N|117	AAGCTCCATTAATGACCTCACAGACCACAACCATGATGGCACCCCCGACA[A/G]CCTTCCTGTGCACGTGTGAGTTGGTGCTCACTGCTGCCCCCATCACCCTC
325	AM_10660	SLC15A1_c.330C>T(N110N)	rs8187822	snp	N	13	99376201	A // B	T // C	N/A	-	-	SLC15A1	PA323	NM_005073.3|NP_005064.1|C|N|110|coding-synonymous|T|N|110	TGAGCACCAACTCACACGTGCACAGGAAGGCTGTCGGGGGTGCCATCATG[A/G]TTGTGGTCTGTGAGGTCATTAATGGAGCTTACTGAGGTGACTGCTTGTCC
326	AM_10661	SLC15A1_c.258G>A(S86S)	rs8187823	snp	N	13	99376273	A // B	A // G	N/A	-	-	SLC15A1	PA323	NM_005073.3|NP_005064.1|G|S|86|coding-synonymous|A|S|86	GCAATTAACTCGGATTCTCTTAATCTTTGGAAACACAGGACCATTGTGTC[A/G]CTCTCCATTGTCTACACAATTGGACAAGCAGTCACCTCAGTAAGCTCCAT
327	AM_10662	SLC15A1_c.83T>A(F28Y)	rs8187817	snp	N	13	99378642	A // B	A // T	N/A	-	-	SLC15A1	PA323	NM_005073.3|NP_005064.1|T|F|28|coding-nonsynonymous|A|Y|28	TTATCCCCTGAGCATCTTCTTCATCGTGGTCAATGAGTTTTGCGAAAGAT[A/T]TTCCTACTATGGAATGCGAGGTAACTGTATTGGCCGTTTCTCACCCTTCA
328	AM_10663	SLC15A1_c.61G>A(V21I)	rs8187818	snp	N	13	99378664	A // B	A // G	N/A	-	-	SLC15A1	PA323	NM_005073.2|NP_005064.1|G|V|21|coding-nonsynonymous|A|I|21	TTTTTTGTCAGAGTTTCTTTGGTTATCCCCTGAGCATCTTCTTCATCGTG[A/G]TCAATGAGTTTTGCGAAAGATTTTCCTACTATGGAATGCGAGGTAACTGT
329	AM_10664	SLC15A1_c.22-40G>C	rs8187819	snp	N	13	99378743	A // B	C // G	N/A	-	-	SLC15A1	PA323	NM_005073.3|NP_005064.1||||intron|||	TTGGCTGCCTTTCATGCCACTGGTGCTCCTTTGTGGCTATGGACCAGTGG[C/G]GGGTGTATTTCAATCCTGTGCTTGTTTCTTTTTTGTCAGAGTTTCTTTGG
330	AM_10666	SLC10A2_c.*1496A>G	rs3803258	snp	N	13	103696987	A // B	G // A	N/A	-	-	SLC10A2	PA318	NM_000452.2|||||mrna-utr|||	TGAAAAGCAGAATCCCTCACCCCTCTACTGGAAGAGCTAAGTTGAGTTCC[C/T]GTTCCCATAATGCTTGGGTGCACCAGCAGAATCTGAACTCAGAACATGCA
331	AM_10671	SLC10A2_c.*755C>T	rs2301159	snp	N	13	103697728	A // B	C // T	N/A	-	-	SLC10A2	PA318	NM_000452.2|||||mrna-utr|||	GTCCAGTGATACCCACTAGATCTTCCAAGGAAAAACATAATTCTTTCAAA[C/T]GGTGTGTATTTGGCAAAGAGCTCTTCAAATCTGGGAGAGGGACTTCCTCA
332	AM_10672	SLC10A2_c.*373C>G	rs279942	snp	N	13	103698110	A // B	C // G	N/A	-	-	SLC10A2	PA318	NM_000452.2|||||mrna-utr|||	CAAAACTGAATTCTTATGCAGAATTTCCTAGCCCATAGATGACAACCTGA[C/G]TTTCTGTATGTTAAAGTAGATGTAATGAATTATTATTATTACAGTGGTCA
333	AM_10673	SLC10A2_c.*315G>T	rs279941	snp	N	13	103698168	A // B	T // G	N/A	-	-	SLC10A2	PA318	NM_000452.2|||||mrna-utr|||	GTCATCTATGGGCTAGGAAATTCTGCATAAGAATTCAGTTTTGGTGTTAA[A/C]GATGTTTTCATTCTCGGTGTTCCCTATGTCAGGTTTAGTCTGAGAATATT
334	AM_10675	SLC10A2_c.*120T>C	rs2301157	snp	N	13	103698363	A // B	T // C	N/A	-	-	SLC10A2	PA318	NM_000452.2|||||mrna-utr|||	AAGAATTGGGCCACCAGTCACTTGGTACTGAAACCAATACATGAATTCCA[A/G]TGAAATTCCAATTTTCACTTTAACTCTTTTCTGCCAACTGTCCTACCAAA
335	AM_10678	SLC10A2_c.511G>T(A171S)	rs188096	snp	N	13	103705044	A // B	G // T	N/A	-	-	SLC10A2	PA318	NM_000452.2|NP_000443.1|G|A|171|coding-nonsynonymous|T|S|171	GTTCTGCTGATCACATTGCCCTTCTGTCATCTTTAGGTACATCTCTGGTT[G/T]CTCTCGTTGTTCCTGTTTCCATTGGAATGTTTGTTAATCACAAATGGCCC
336	AM_10681	SLC10A2_c.426G>A(P142P)	rs157381	snp	N	13	103710684	A // B	G // A	N/A	-	-	SLC10A2	PA318	NM_000452.2|NP_000443.1|G|P|142|coding-synonymous|A|P|142	ACGATGCTCCCAGAGTCGACCCACATTTTGGTATAGATAAGGAGGCACAG[C/T]GGCATCATTCCGAGGGCAAGCAGTGTGGAGCATGTGGTCATGCTGACGCT
337	AM_10686	SLC10A2_c.-457A>G	rs7987433	snp	N	13	103719056	A // B	G // A	N/A	-	-	SLC10A2	PA318	NM_000452.2|||||mrna-utr|||	CAGAATCTTATAGGGATTGAGCCATAGGAACCATGCCATATAAAAAGAGC[C/T]GTGTTAATGTTTCATGCCATGAAGGTTTGTTGGATAATTTCAGTTAAGTG
338	AM_10687	SLC7A7_c.1527G>A(K509K)	rs1061040	snp	N	14	23242828	A // B	A // G	N/A	-	-	SLC7A7	PA35925	NM_003982.3|NP_003973.3|G|K|509|coding-synonymous|A|K|509	GAAATGGATTTGGAAGATGGAGGAGAGATGCCCAAGCAACGGGATCCCAA[A/G]TCTAACTAAACACCATCTGGAATCCTGATGTGGAAAGCAGGGGTTTCTGG
339	AM_10690	SLC7A7_c.698A>G(Y233C)	rs11568432	snp	N	14	23248074	A // B	A // G	N/A	-	-	SLC7A7	PA35925	NM_003982.3|NP_003973.3|A|Y|233|coding-nonsynonymous|G|C|233	TTCCTTTGAGGGTTCATCATTTGCAGTGGGTGACATTGCCCTGGCACTGT[A/G]CTCAGCTCTGTTCTCCTACTCAGGCTGGGACACCCTCAACTATGTCACTG
340	AM_10691	SLC7A7_c.660T>C(G220G)	rs1805061	snp	N	14	23248112	A // B	T // C	N/A	-	-	SLC7A7	PA35925	NM_003982.3|NP_003973.3|T|G|220|coding-synonymous|C|G|220	AACAGAGCTGAGTACAGTGCCAGGGCAATGTCACCCACTGCAAATGATGA[A/G]CCCTCAAAGGAATTCTCAAAATGAGTAGAGGCTCCTGGAACCCAAGAACA
341	AM_10692	SLC7A7_c.498C>T(I166I)	rs8018462	snp	N	14	23282110	A // B	T // C	N/A	-	-	SLC7A7	PA35925	NM_003982.3|NP_003973.3|C|I|166|coding-synonymous|T|I|166	GCCTCTGTCCAGCCCTCCACCCACCACCTCCTACCCCAGCCCCACTTACA[A/G]ATGCAGGCAGCAGCCAGCAGGCGGCTGGCAGCATAAGGGGCGAAGCAGCT
342	AM_10694	SLC7A7_c.456C>T(F152F)	rs8016634	snp	N	14	23282152	A // B	C // T	N/A	-	-	SLC7A7	PA35925	NM_003982.3|NP_003973.3|C|F|152|coding-synonymous|T|F|152	GCCATCACCTTTGCCAACTACATGGTACAGCCTCTCTTCCCGAGCTGCTT[C/T]GCCCCTTATGCTGCCAGCCGCCTGCTGGCTGCTGCCTGCATTTGTAAGTG
343	AM_10696	SLC7A7_c.159A>G(S53S)	rs1805059	snp	N	14	23282449	A // B	G // A	N/A	-	-	SLC7A7	PA35925	NM_003982.3|NP_003973.3|A|S|53|coding-synonymous|G|S|53	CCAAAGGAGGCACTGTATATGAGCACACCCTTGGGGGAAACAAAGATGCC[C/T]GAGCCGATCATGTTCCCCACAATCAGGCACACGCCGTTAAGCAGTGAGAT
344	AM_10697	SLC7A7_c.-86C>T	rs2281677	snp	N	14	23284572	A // B	C // T	N/A	-	-	SLC7A7	PA35925	NM_003982.3|||||mrna-utr|||	GGAGGAGCATCAGACCACAGATCCTGGAAGGCACTTCTCTCCCTGACTGC[C/T]GCTCACACTGCCGTGAGAACCTGCTTATATCCAGGACCAAGGAGTGAGTG
345	AM_10698	SLC7A8_c.*665T>C	rs2236135	snp	N	14	23595721	A // B	T // C	N/A	-	-	SLC7A8	PA35926	NM_012244.2|||||mrna-utr|||	TGGGGGCTGGATGCAGGAGGCAGGGGCAGGGCTGGGTTTCTGCAATCTGA[A/G]CCTTTCTCAATATGTTCCTCAACCGCCTGGCTTGGGGGTGGAGAGGCTGT
346	AM_10709	SLC7A8_c.508+1988T>C	rs910795	snp	N	14	23632506	A // B	T // C	N/A	-	-	SLC7A8	PA35926	NM_012244.2|NP_036376.2||||intron|||	CGACCTCTTGAGGCAGCTAGGATTACACTCCCCATCTCACAGTAGGGTGG[A/G]CGAGTGATTTTGCCCAGCACTCACCACTGCAGTTAGAAATGGTGGACTGG
347	AM_10710	SLC7A8_c.152-1008T>C	rs2268877	snp	N	14	23636757	A // B	C // T	N/A	-	-	SLC7A8	PA35926	NM_012244.2|NP_036376.2||||intron|||	ACGGCCTCCACACTCTTACTCCTCGTCTGCGTAACACACAACCCAGCAGC[C/T]AGCCATTCAGTACCGGCTGCGGGCCTCACCTCTCAGGAGAAAACCAGCCC
348	AM_10711	SLC7A8_c.152-5045T>C	rs2268873	snp	N	14	23640794	A // B	C // T	N/A	-	-	SLC7A8	PA35926	NM_012244.2|NP_036376.2||||intron|||	CCTCGAAGCCCCAGGAGGAGGCTGTGGCTAGATTTCAAGGCTAGCATGAG[C/T]AAGGAAGGCCAAAGCCTTTTGGATCTGAGGGTCTGTTGGGCATCAGAACT
349	AM_10712	SLC7A8_c.151+2181T>C	rs8013529	snp	N	14	23649792	A // B	T // C	N/A	-	-	SLC7A8	PA35926	NM_012244.2|NP_036376.2||||intron|||	TTTCTCTGAAATCACATATTTGGAATCTCTTTTCATCACAGAACACCAGA[A/G]TTGCCATTCTAGTTACTGTAATGCCACCATGGGGAGCTTTGAGATTATTC
350	AM_10713	SLC7A8_c.120C>T(I40I)	rs1884545	snp	N	14	23652004	A // B	C // T	N/A	-	-	SLC7A8	PA35926	NM_012244.2|NP_036376.2|C|I|40|coding-synonymous|T|I|40	AGCCCCGAGGCTGGTTCCGGAGGGGGCGGAGTAGCCCTGAAGAAAGAGAT[C/T]GGATTGGTCAGTGCCTGTGGTATCATCGTAGGTGAGTTCCATTCCTTCCC
351	AM_10714	SLC7A8_c.-1065T>G	rs7141505	snp	N	14	23653188	A // B	T // G	N/A	-	-	SLC7A8	PA35926	NM_012244.2|NP_036376.2||||locus-region|||	TACAGGTCATACAGCATCTGTGAGCTTTATAAATCAGGGAACAGTTGTGC[A/C]GATACTTTTAATGCCATCAGAAATAAACTAGCCAATGTATTAAAAAATAT
352	AM_10715	SLC10A1_c.960C>A(I320I)	rs56903885	snp	N	14	70243089	A // B	C // A	N/A	-	-	SLC10A1	PA317	NM_003049.3|NP_003040.1|C|I|320|coding-synonymous|A|I|320	CCATTTCCCAGAGCTCCTGGAATTGTTTCTTCAGTTGTGGCAGCTGTGTA[G/T]ATCATTTTTGTTTTATCTGTAAAGTTAAAAAGGGTTACAGGTGTAGAGAG
353	AM_10716	SLC10A1_c.940A>G(K314E)	rs72547506	snp	N	14	70245053	A // B	G // A	N/A	-	-	SLC10A1	PA317	NM_003049.3|NP_003040.1|A|K|314|coding-nonsynonymous|G|E|314	TCTAATATTGGAGCAGAACTTGAAGTGGGGATAATTTCAGTACTCACCCT[C/T]GGGAGTCTTGAATTTCTCATAGCACCAAAATATGGCAATGAGGAGAAGCC
354	AM_10717	SLC10A1_c.836T>C(I279T)	rs72547507	snp	N	14	70245157	A // B	T // C	N/A	-	-	SLC10A1	PA317	NM_003049.3|NP_003040.1|T|I|279|coding-nonsynonymous|C|T|279	CTCCAAGCTGGAAAATCATGTAGAGGAGGGGAAAGAAGAAAAGTGGTCCA[A/G]TGACTTCAGGTGGAAAGGCCACATTGAGGATGGTGGAACAGAGTTGGACA
355	AM_10718	SLC10A1_c.800C>T(S267F)	rs2296651	snp	N	14	70245193	A // B	T // C	N/A	-	-	SLC10A1	PA317	NM_003049.3|NP_003040.1|C|S|267|coding-nonsynonymous|T|F|267	AGAAAAGTGGTCCAATGACTTCAGGTGGAAAGGCCACATTGAGGATGGTG[A/G]AACAGAGTTGGACATTTTGGCATCCAGTCTCCATGCTGACAGTGCGTCTG
356	AM_10719	SLC10A1_c.668T>C(I223T)	rs61745930	snp	N	14	70245977	A // B	T // C	N/A	-	-	SLC10A1	PA317	NM_003049.3|NP_003040.1|T|I|223|coding-nonsynonymous|C|T|223	GAACATAACCCAGCAGAAAGCCAATAAAAGGCATCAGGGAGGAGGTGGCA[A/G]TCAAGAGTGGTGTCATGGCAAACATGATGCTCTTCCCCACATTGATGGCA
357	AM_10720	SLC10A1_c.627T>C(N209N)	rs55645214	snp	N	14	70246018	A // B	T // C	N/A	-	-	SLC10A1	PA317	NM_003049.3|NP_003040.1|T|N|209|coding-synonymous|C|N|209	GAGGTGGCAATCAAGAGTGGTGTCATGGCAAACATGATGCTCTTCCCCAC[A/G]TTGATGGCAGAGAGAACTGTGACGGCCACACTGCACAAGAGAATGATGAT
358	AM_10722	SLC10A1_c.225G>A(T75T)	rs4646285	snp	N	14	70263648	A // B	G // A	N/A	-	-	SLC10A1	PA317	NM_003049.3|NP_003040.1|G|T|75|coding-synonymous|A|T|75	GCCAGTGCCTCAATGTTCTTCAGCCGGAAGACCTTGCCCAGCACAAAGGC[C/T]GTGAGGGGCATGATGCCATACTGTGCCACCAGGGCGATGGCCAGCCCTTT
359	AM_10724	GSTZ1_c.94G>A(E32K)	rs7975	snp	N	14	77793207	A // B	G // A	N/A	+	+	GSTZ1	PA29031	NM_145870.2|NP_665877.1|G|E|32|coding-nonsynonymous|A|K|32	CCTTCTTACCTGTTGGCCCCCATCCTTTATGAGATTGATGGGCACCGTCT[C/T]GTAGTCGATGCCTTTCAAGGCCAGAGCTAGGAGAGACCGCACATAGCGGA
360	AM_10725	GSTZ1_c.124G>A(G42R)	rs7972	snp	N	14	77793237	A // B	G // A	N/A	+	+	GSTZ1	PA29031	NM_145870.2|NP_665877.1|G|G|42|coding-nonsynonymous|A|R|42	TCCAATTCCCACATTGTGGTCTGGGCACAGCCTTCTTACCTGTTGGCCCC[C/T]ATCCTTTATGAGATTGATGGGCACCGTCTCGTAGTCGATGCCTTTCAAGG
361	AM_10726	GSTZ1_c.245C>T(T82M)	rs1046428	snp	N	14	77794283	A // B	C // T	N/A	+	+	GSTZ1	PA29031	NM_145870.2|NP_665877.1|C|T|82|coding-nonsynonymous|T|M|82	CTCACTGCTCCCCTCTGGACAGCTGGCCATCATTGAGTATCTAGAGGAGA[C/T]GCGTCCCACTCCGCGACTTCTGCCTCAGGACCCAAAGAAGAGGGCCAGCG
362	AM_10727	GSTZ1_c.397A>C(N133H)	rs2234955	snp	N	14	77795520	A // B	C // A	N/A	+	+	GSTZ1	PA29031	NM_145870.2|NP_665877.1|A|N|133|coding-nonsynonymous|C|H|133	GGCAGCTCACAGAGGTGAGGACTCACCGTTAAAGCCACAAGTGATGGCGT[G/T]CTGGGCCCAGGTCAGCTGCATCTCCTCTCCCACTTGCTTCAGGACAGACA
363	AM_10728	CYP46A1_42805G>A	rs15506	snp	N	14	100193559	A // B	G // A	N/A	+	+	CYP46A1	PA27117	NM_006668.1|||||mrna-utr|||	ACTCTGTGCCGGGCCCTGGGTGGGCACAGGGGGCTCAGAGACAAATCACA[C/T]GCAGACCCTACCCTTGAGGCGCTGACAGCCTGGCAGGGCAATTGGTCACG
364	AM_10730	SLC28A2_c.225C>A(S75R)	rs1060896	snp	N	15	45554267	A // B	A // C	N/A	+	+	SLC28A2	PA386	NM_004212.3|NP_004203.2|C|S|75|coding-nonsynonymous|A|R|75	AGTCGGTGGCCTTTCAGCAAAGCAAGAAGTTTCTGCAAAACACACGCCAG[A/C]TTGTTCAAGAAGATCCTGTTGGGCCTGTTGTGTTTGGGTGAGATATTGAG
365	AM_10731	SLC28A2_c.488T>G(L163W)	rs2271437	snp	N	15	45556120	A // B	G // T	N/A	+	+	SLC28A2	PA386	NM_004212.3|NP_004203.2|T|L|163|coding-nonsynonymous|G|W|163	CTTCTTCAGGGTGTTTGCAGGAGTCTCCTTGGTTGGCCTTATACTGTGGT[G/T]GGCTTTAGACACAGCCCAAAGGCCAGAGCAGCTGATCCCCTTTGCAGGAA
366	AM_10732	SLC28A2_c.531T>C(F177F)	rs8023604	snp	N	15	45556163	A // B	C // T	N/A	+	+	SLC28A2	PA386	NM_004212.3|NP_004203.2|T|F|177|coding-synonymous|C|F|177	CTGTGGTTGGCTTTAGACACAGCCCAAAGGCCAGAGCAGCTGATCCCCTT[C/T]GCAGGAATCTGCATGTTCATCCTTATCCTCTTTGCCTGCTCCAAACACCA
367	AM_10733	SLC28A2_c.734G>C(S245T)	rs10519020	snp	N	15	45557318	A // B	C // G	N/A	+	+	SLC28A2	PA386	NM_004212.3|NP_004203.2|G|S|245|coding-nonsynonymous|C|T|245	TTTCTTTTTTTCCCTTCAGATTTTCCTGAACTACACTGTGGCCGGCTCCA[C/G]TTTTGTCTTTGGGGATACACTGGTCAAGGATGTCTTTGCTTTTCAGGTGA
368	AM_10734	SLC28A2_c.993T>A(S331S)	rs17222036	snp	N	15	45559703	A // B	A // T	N/A	+	+	SLC28A2	PA386	NM_004212.3|NP_004203.2|T|S|331|coding-synonymous|A|S|331	ACAGAGGCACCTCTGCTCATCCGTCCCTACCTTGGGGACATGACACTCTC[A/T]GAAATCCATGCGGTGATGACTGGAGGGTTTGCCACCATTTCTGGCACTGT
369	AM_10735	SLC28A2_c.1064T>C(F355S)	rs17215633	snp	N	15	45559774	A // B	C // T	N/A	+	+	SLC28A2	PA386	NM_004212.3|NP_004203.2|T|F|355|coding-nonsynonymous|C|S|355	TGGAGGGTTTGCCACCATTTCTGGCACTGTGCTGGGAGCCTTCATAGCCT[C/T]TGGGGTAGGCATAGTCTGCTTGATCACTCCTGGGTGAACTCGAGTTGGGT
370	AM_10739	SLC28A2_c.1526G>A(G509E)	rs9635306	snp	N	15	45561693	A // B	A // G	N/A	+	+	SLC28A2	PA386	NM_004212.3|NP_004203.2|G|G|509|coding-nonsynonymous|A|E|509	GTTTGTGGCTTATCAGCAACTGTCTCAATACAAGAACAAACGTCTCTCTG[A/G]AATGGAGGAGTGGATTGAGGGAGAGAAACAGTGGATTTCTGTAAGTGACA
371	AM_10740	CYP19A1_33028T>A(3'UTR)	rs1050787	snp	N	15	51502082	A // B	A // T	N/A	-	-	CYP19A1	PA27091	NM_031226.2|||||mrna-utr|||	TAACCAAGAGATAACTGTAAATGTGACATTGATTTGCTCTTACTACAGCT[A/T]CAGTGATTGGGGGAGGAAAAGTCCCAACCCAATGGGCTCAAACTTCTAAG
372	AM_10741	CYP19A1_32812T>C(3'UTR)	rs1050760	snp	N	15	51502298	A // B	C // T	N/A	-	-	CYP19A1	PA27091	NM_031226.2|||||mrna-utr|||	TGCCTGTGCTACAATTCATTGTGTTACCTGTAGATTCAGGTAATACAAAC[C/T]ATATATAATCATCAAGTAATACAAACTAATTTAGTAATAGCCTGGGTTAA
373	AM_10742	CYP19A1_32266G>T(3'UTR)	rs4646	snp	N	15	51502844	A // B	T // G	N/A	-	-	CYP19A1	PA27091	NM_031226.2|||||mrna-utr|||	TGCTTTTTCTCTTGTAGCCTGGTTCTCTGGTGTGAACAGGAGCAGATGAC[A/C]AATAGCACCTAGCTTGGTGACAACCCATAGGAGGTATGCCTATAAAATGC
374	AM_10743	CYP19A1_32217C>A(3'UTR)	rs1050677	snp	N	15	51502893	A // B	C // A	N/A	-	-	CYP19A1	PA27091	NM_031226.2|||||mrna-utr|||	CAAATAGCACCTAGCTTGGTGACAACCCATAGGAGGTATGCCTATAAAAT[G/T]CCATGGGCCACTGAGTGTTCACTGTGAGGATGACACTATTGGCAAGGATG
375	AM_10744	CYP19A1_32124C>T(3'UTR)	rs10046	snp	N	15	51502986	A // B	C // T	N/A	-	-	CYP19A1	PA27091	NM_031226.2|||||mrna-utr|||	CAAGAAACTCAGACAGGTGTCTGGAACACTAGAGAAGGCTGGTCAGTACC[C/T]ACTCTGGAGCATTTCTCATCAGTAGTTCACATACAAATCATCCATCCTTG
376	AM_10745	CYP19A1_30554C>T(P408P)	rs2304461	snp	N	15	51504556	A // B	C // T	N/A	-	-	CYP19A1	PA27091	NM_031226.2|NP_112503.1|C|P|408|coding-synonymous|T|P|408	ACAAACATTATCCTGAATATTGGAAGGATGCACAGACTCGAGTTTTTCCC[C/T]AAACCCAATGAATTTACTCTTGAAAATTTTGCAAAGAATGTAAGAGCCCT
377	AM_10746	CYP19A1_27143G>A(R264H)	rs2304462	snp	N	15	51507967	A // B	G // A	N/A	-	-	CYP19A1	PA27091	NM_031226.2|NP_112503.1|G|R|264|coding-nonsynonymous|A|H|264	CAGTGGCAAAGTCCATACATTCTTCCAGTTTCTCTTCTGTGGAAATCCTG[C/T]GTCTTTTTTCTGCTATCAGAACTTCTATGGCATCTTTCAAATCCTTGCTG
378	AM_10747	CYP19A1*4_27142C>T(R264C)	rs700519	snp	N	15	51507968	A // B	C // T	N/A	-	-	CYP19A1	PA27091	NM_031226.2|NP_112503.1|C|R|264|coding-nonsynonymous|T|C|264	CCAGCAAGGATTTGAAAGATGCCATAGAAGTTCTGATAGCAGAAAAAAGA[C/T]GCAGGATTTCCACAGAAGAGAAACTGGAAGAATGTATGGACTTTGCCACT
379	AM_10748	CYP19A1_5998A>G(V80V)	rs700518	snp	N	15	51529112	A // B	A // G	N/A	-	-	CYP19A1	PA27091	NM_031226.2|NP_112503.1|A|V|80|coding-synonymous|G|V|80	AGATTCCTGTGGATGGGGATCGGCAGTGCCTGCAACTACTACAACCGGGT[A/G]TATGGAGAATTCATGCGAGTCTGGATCTCTGGAGAGGAAACACTCATTAT
380	AM_10749	CYP19A1*2_115T>C(W39R)	rs2236722	snp	N	15	51534995	A // B	C // T	N/A	-	-	CYP19A1	PA27091	NM_031226.2|NP_112503.1|T|W|39|coding-nonsynonymous|C|R|39	CTGCTGCCACCATGCCAGTCCTGCTCCTCACTGGCCTTTTTCTCTTGGTG[C/T]GGAATTATGAGGGCACATCCTCAATACCAGGTAAGTCAGTCATTTATTTC
381	AM_10750	CYP19A1_-12829G>C(5'UTR)	rs1062033	snp	N	15	51547938	A // B	C // G	N/A	-	-	CYP19A1	PA27091	NM_031226.2|NP_112503.1||||intron|||	AGTAATCTCATTACTTAAATCATATCCTAGCATGTGGAAAAGCTCCCTGA[C/G]TTCCCCGCCTGCCCCACCTGCTGATTTCTCAGGACCGCTGATAACAGCTT
382	AM_10751	CYP11A1_c.1091A>G(Q364R)	rs57982762	snp	N	15	74631994	A // B	G // A	N/A	-	-	CYP11A1	PA27089	NM_000781.2|NP_000772.2|A|Q|364|coding-nonsynonymous|G|R|364	TGCTGGCTTTGAGGAGGGGGACCAGCTGTAGCATCGTGGCCATGTCTCCC[C/T]GGGCCTGGTGCCGCGCAGCCAAGACCTCTGCCCGCAGCATATCCTGCACC
383	AM_10752	CYP11A1_c.1057C>T(R353W)	rs72547508	snp	N	15	74632028	A // B	T // C	N/A	-	-	CYP11A1	PA27089	NM_000781.2|NP_000772.2|C|R|353|coding-nonsynonymous|T|W|353	CGTGGCCATGTCTCCCTGGGCCTGGTGCCGCGCAGCCAAGACCTCTGCCC[A/G]CAGCATATCCTGCACCTTCAGGTTGCGTGCCATCTCATACAAGTGCCACT
384	AM_10754	CYP11A1_c.939C>T(F313F)	rs4986873	snp	N	15	74635369	A // B	C // T	N/A	-	-	CYP11A1	PA27089	NM_000781.2|NP_000772.2|C|F|313|coding-synonymous|T|F|313	GATTACCGTGGCATCCTCTACAGACTCCTGGGAGACAGCAAGATGTCCTT[C/T]GAGGACATCAAGGCCAACGTCACAGAGATGCTGGCAGGAGGGGTGGACAC
385	AM_10755	CYP11A1_c.903C>G(I301M)	rs1049968	snp	N	15	74635405	A // B	G // C	N/A	-	-	CYP11A1	PA27089	NM_000781.2|NP_000772.2|C|I|301|coding-nonsynonymous|G|M|301	GCCTTGATGTCCTCGAAGGACATCTTGCTGTCTCCCAGGAGTCTGTAGAG[C/G]ATGCCACGGTAATCGTGGTGAACACTTCCTTTCTGTCTCAATTCCCAGTA
386	AM_10757	CYP11A1_c.636C>T(N212N)	rs6160	snp	N	15	74636323	A // B	T // C	N/A	-	-	CYP11A1	PA27089	NM_000781.2|NP_000772.2|C|N|212|coding-synonymous|T|N|212	TCGGGGTTCACTACTTCCTCCAGCATCCCCTGGCGCTCCCCAAAAATGAC[A/G]TTAGTGATGGCTGCAGGGAGAGGAAGAGGCTGAGGAGCCATTTCTGACGG
387	AM_10758	CYP11A1_c.535G>A(V179I)	rs58174009	snp	N	15	74637475	A // B	G // A	N/A	-	-	CYP11A1	PA27089	NM_000781.2|NP_000772.2|G|V|179|coding-nonsynonymous|A|I|179	CGAGTAATTTCCGGAGCCCGCCTTCTTGATGCGCCTGTGCAGGACACTGA[C/T]GAAGTCCCGAGACACTGCATCCAACAGGGGCAAAAAGTTCTTGGTGGCCT
388	AM_10759	CYP11A1_c.47G>A(C16Y)	rs1130841	snp	N	15	74659880	A // B	G // A	N/A	-	-	CYP11A1	PA27089	NM_000781.2|NP_000772.2|G|C|16|coding-nonsynonymous|A|Y|16	GCACCCTGAGACGCCCCAGCCCCTCCCTGGGGGCACTCAGAAAGGTCTGG[C/T]AGCCTTTGACCAGGACTGAGCGTGGGGGAAGACCCTTGGCCAGCATGCTG
389	AM_10762	CYP1A1*3_3204T>C(3'UTR)	rs1800031	snp	N	15	75012235	A // B	C // T	N/A	-	-	CYP1A1	PA27092	NM_000499.3|||||mrna-utr|||	ATCACATTCCTCTGCCCTTCCTGCAGGCAGGAACAAACAGGGCTGCCTTC[C/T]GGCCTTGTAAGACCCTTATTGCTGTCCTGGAGGGGCTGGGGACTTGTGTC
390	AM_10765	CYP1A1*10_2499C>T(R477W)	rs56240201	snp	N	15	75012940	A // B	T // C	N/A	-	-	CYP1A1	PA27092	NM_000499.3|NP_000490.1|C|R|477||||477	GATGGGGGTCATGTCCACCTTCACGCCCAGTGGCACGCTGAATTCCACCC[A/G]TTGCAGCAGGATAGCCAGGAAGAGAAAGACCTCCCAGCGGGCAATGGTCT
391	AM_10766	CYP1A1*5or*9_2460C>A>T(R464SorC)	rs41279188	snp	N	15	75012979	A // B // C	A // C // T	N/A	-	-	CYP1A1	PA27092	NM_000499.3|NP_000490.1|C|R|464|coding-nonsynonymous|A|S|464	TGATTATCTTTGGCATGGGCAAGCGGAAGTGTATCGGTGAGACCATTGCC[A/C/T]GCTGGGAGGTCTTTCTCTTCCTGGCTATCCTGCTGCAACGGGTGGAATTC
392	AM_10767	CYP1A1_2458C>G(A463G)	rs2278970	snp	Y	15	75012981	A // B	G // C	N/A	-	-	CYP1A1	PA27092	NM_000499.3|NP_000490.1|C|A|463|coding-nonsynonymous|G|G|463	ATTCCACCCGTTGCAGCAGGATAGCCAGGAAGAGAAAGACCTCCCAGCGG[C/G]CAATGGTCTCACCGATACACTTCCGCTTGCCCATGCCAAAGATAATCACC
393	AM_10768	CYP1A1*2C_2454A>G(I462V)	rs1048943	snp	Y	15	75012985	A // B	G // A	N/A	-	-	CYP1A1	PA27092	NM_000499.3|NP_000490.1|A|I|462|coding-nonsynonymous|G|V|462	CACCCGTTGCAGCAGGATAGCCAGGAAGAGAAAGACCTCCCAGCGGGCAA[C/T]GGTCTCACCGATACACTTCCGCTTGCCCATGCCAAAGATAATCACCTTCT
394	AM_10769	CYP1A1*4_2452C>A(T461N)	rs1799814	snp	Y	15	75012987	A // B	C // A	N/A	-	-	CYP1A1	PA27092	NM_000499.3|NP_000490.1|C|T|461|coding-nonsynonymous|A|N|461	CCCGTTGCAGCAGGATAGCCAGGAAGAGAAAGACCTCCCAGCGGGCAATG[G/T]TCTCACCGATACACTTCCGCTTGCCCATGCCAAAGATAATCACCTTCTCA
395	AM_10770	CYP1A1*8_2413T>A(I448N)	rs72547509	snp	Y	15	75013026	A // B	T // A	N/A	-	-	CYP1A1	PA27092	NM_000499.3|NP_000490.1|T|I|448|coding-nonsynonymous|A|N|448	AGCGGGCAATGGTCTCACCGATACACTTCCGCTTGCCCATGCCAAAGATA[A/T]TCACCTTCTCACTTAACACCTTGTCGATAGCACCATCAGGGGTGAGAAAC
396	AM_10771	CYP1A1*7_2345insT	rs72547510	in-del	Y	15	75013093	A // B	- // T	N/A	-	-	CYP1A1	PA27092	NM_000499.3|NP_000490.1|-|-|425|coding-nonsynonymous|T|S|425	ACCTTGTCGATAGCACCATCAGGGGTGAGAAACCGTTCAGGTAGGAACTC[-/A]AGATGGGTTGACCCATAGCTTCCTGTAACCAGAGGGAGACAGCTGAAGTGG
397	AM_10772	CYP1A1_1876C>A(F381L)	rs2856833	snp	N	15	75013563	A // B	C // A	N/A	-	-	CYP1A1	PA27092	NM_000499.3|NP_000490.1|C|F|381|coding-nonsynonymous|A|L|381	GACAGCAGTGGCTCCATGGGGCCTTACCTGTGGGGGATGGTGAAGGGGAC[G/T]AAGGAAGAGTGTCGGAAGGTCTCCAGGATGAAGGCCTCCATATAGGGCAG
398	AM_10774	CYP1A1*6_1635G>T(M331I)	rs56313657	snp	N	15	75013804	A // B	T // G	N/A	-	-	CYP1A1	PA27092	NM_000499.3|NP_000490.1|G|M|331||||331	CCTAGCTCCTCTTGGATCTTTCTCTGTACCCTGGGGTTCATCACCAAATA[A/C]ATGAGGCTCCAGGAGATAGCAGTTGTGACTGTGTCAAACCCTGGACAGGG
399	AM_10775	CYP1A1_1412T>C(I286T)	rs4987133	snp	N	15	75014027	A // B	T // C	N/A	-	-	CYP1A1	PA27092	NM_000499.3|NP_000490.1|T|I|286|coding-nonsynonymous|C|T|286	ACAGCTGGACATTGGCGTTCTCATCCAGCTGCTTCTCCTGACAGTGCTCA[A/G]TCAGGCTGTCTGTGATGTCCCGGATGTGGCCCTTAGGTAGGGAAAGTCCA
400	AM_10776	CYP1A1_1390C>T(R279W)	rs34260157	snp	N	15	75014049	A // B	C // T	N/A	-	-	CYP1A1	PA27092	NM_000499.3|NP_000490.1|C|R|279|coding-nonsynonymous|T|W|279	GGTTTGAGATCTTGCTCACCTGTGGACTTTCCCTACCTAAGGGCCACATC[C/T]GGGACATCACAGACAGCCTGATTGAGCACTGTCAGGAGAAGCAGCTGGAT
401	AM_10778	CYP1A1_134G>A(G45D)	rs4646422	snp	N	15	75015305	A // B	A // G	N/A	-	-	CYP1A1	PA27092	NM_000499.3|NP_000490.1|G|G|45|coding-nonsynonymous|A|D|45	CTCAAGACCTCAGGTCCCCAAAGGCCTGAAGAATCCACCAGGGCCATGGG[A/G]CTGGCCTCTGATTGGGCACATGCTGACCCTGGGAAAGAACCCGCACCTGG
402	AM_10780	CYP1A2*1C_-3860G>A(Promoter)	rs2069514	snp	Y	15	75038220	A // B	G // A	N/A	+	+	CYP1A2	PA27093	NM_000761.3||||||||	CCTGTAATTCCAGCTACTCGGGAAGCTGGGGCATGACAATTGCTTGAATC[C/T]GAGAGGCGGAGGTTGCGGTGAGCCAAGATCGCACCACTGCACTCCAGCCT
403	AM_10782	CYP1A2*1D_-2467delT(Promoter)	rs35694136	in-del	N	15	75039613	A // B	- // T	N/A	+	+	CYP1A2	PA27093	NM_000761.3|NP_000752.2||||locus-region|||	TTGTTTGAGCTCAGGAGGTCGAGGCTGCAGTGAGCCATGATTGTGGCACA[-/T]GAACCCCAACCTGGGTGACAGAGCAAGACTCTGTATCTAAAAAAAAAAAA
404	AM_10783	CYP1A2*1K_-739T>G(Promoter)	rs2069526	snp	N	15	75041341	A // B	G // T	N/A	+	+	CYP1A2	PA27093	NM_000761.3|NP_000752.2||||intron|||	TGGAAGCTAGTGGGGACAGAAAGACGGGGAGCCTGGGCTAGGTGTAGGGG[G/T]CCTGAGTTCCGGGCTTTGCTACCCAGCTCTTGACTTCTGTTTCCCGATTT
405	AM_10784	CYP1A2*1K_-729C>T(Promoter)	rs12720461	snp	N	15	75041351	A // B	C // T	N/A	+	+	CYP1A2	PA27093	NM_000761.3|NP_000752.2||||intron|||	TGGGGACAGAAAGACGGGGAGCCTGGGCTAGGTGTAGGGGTCCTGAGTTC[C/T]GGGCTTTGCTACCCAGCTCTTGACTTCTGTTTCCCGATTTTAAATGAGCA
406	AM_10785	CYP1A2*1F_-163C>A(Promoter)	rs762551	snp	N	15	75041917	A // B	A // C	N/A	+	+	CYP1A2	PA27093	NM_000761.3|NP_000752.2||||intron|||	CCTTTCCAGCTCTCAGATTCTGTGATGCTCAAAGGGTGAGCTCTGTGGGC[A/C]CAGGACGCATGGTAGATGGAGCTTAGTCTTTCTGGTATCCAGCTGGGAGC
407	AM_10787	CYP1A2*2_63C>G(F21L)	rs56160784	snp	N	15	75042142	A // B	C // G	N/A	+	+	CYP1A2	PA27093	NM_000761.3|NP_000752.2|C|F|21|coding-nonsynonymous|G|L|21	CAGTCTGTTCCCTTCTCGGCCACAGAGCTTCTCCTGGCCTCTGCCATCTT[C/G]TGCCTGGTATTCTGGGTGCTCAAGGGTTTGAGGCCTCGGGTCCCCAAAGG
408	AM_10788	CYP1A2*15_125C>G(P42R)	rs72547511	snp	N	15	75042204	A // B	C // G	N/A	+	+	CYP1A2	PA27093	NM_000761.3|NP_000752.2|C|P|42|coding-nonsynonymous|G|R|42	CTGGGTGCTCAAGGGTTTGAGGCCTCGGGTCCCCAAAGGCCTGAAAAGTC[C/G]ACCAGAGCCATGGGGCTGGCCCTTGCTCGGGCATGTGCTGACCCTGGGGA
409	AM_10793	CYP1A2*11_558C>A(F186L)	rs72547513	snp	N	15	75042637	A // B	A // C	N/A	+	+	CYP1A2	PA27093	NM_000761.3|NP_000752.2|C|F|186|coding-nonsynonymous|A|L|186	AAGGCCCTGATCAGCAGGTTGCAGGAGCTGATGGCAGGGCCTGGGCACTT[A/C]GACCCTTACAATCAGGTGGTGGTGTCAGTGGCCAACGTCATTGGTGCCAT
410	AM_10796	CYP1A2*3_2116G>A(D348N)	rs56276455	snp	N	15	75044195	A // B	A // G	N/A	+	+	CYP1A2	PA27093	NM_000761.3|NP_000752.2|G|D|348|coding-nonsynonymous|A|N|348	TGTACCTTGTGACCAAGCCTGAGATACAGAGGAAGATCCAGAAGGAGCTG[A/G]GTACATGGGGGCCCCCAACCCTATAGCCAGGAGAAGCCTTGAGACCCAGG
411	AM_10797	CYP1A2_2385G>A	rs72547514	snp	N	15	75044464	A // B	A // G	N/A	+	+	CYP1A2	PA27093	NM_000761.3||||||||	TGGGGCAGTTAGGGCAGCCCCTGAGCTCTGCTTGTCCTCTGTGTTCTACA[A/G]ACACTGTGATTGGCAGGGAGCGGCGGCCCCGGCTCTCTGACAGACCCCAG
412	AM_10798	CYP1A2*16_2473G>A(R377Q)	rs72547515	snp	N	15	75044552	A // B	G // A	N/A	+	+	CYP1A2	PA27093	NM_000761.3|NP_000752.2|G|R|377|coding-nonsynonymous|A|Q|377	CCGGCAGGCCTCACCTGTGGGGGATGGTGAAGGGCAAGAAGGAGGAGTGT[C/T]GGAAGGTCTCCAGGATGAAGGCCTCCAAGTAGGGCAGCTGGGGTCTGTCA
413	AM_10799	CYP1A2*4_2499A>T(I386F)	rs72547516	snp	N	15	75044578	A // B	T // A	N/A	+	+	CYP1A2	PA27093	NM_000761.3|NP_000752.2|A|I|386|coding-nonsynonymous|T|F|386	AGCACTTTAGAGGTGGGAGGGCAGAACCGGCAGGCCTCACCTGTGGGGGA[A/T]GGTGAAGGGCAAGAAGGAGGAGTGTCGGAAGGTCTCCAGGATGAAGGCCT
414	AM_10801	CYP1A2*5_3497G>A(C406Y)	rs55889066	snp	N	15	75045575	A // B	A // G	N/A	+	+	CYP1A2	PA27093	NM_000761.3|NP_000752.2|G|C|406|coding-nonsynonymous|A|Y|406	CACAACAAGGGACACAACGCTGAATGGCTTCTACATCCCCAAGAAATGCT[A/G]TGTCTTCGTAAACCAGTGGCAGGTCAACCATGACCCGTGAGTACATACCC
415	AM_10802	CYP1A2*7_3533G>A(SpliceDefect)	rs56107638	snp	N	15	75045612	A // B	A // G	N/A	+	+	CYP1A2	PA27093	NM_000761.3||||||||	CCCAAGAAATGCTGTGTCTTCGTAAACCAGTGGCAGGTCAACCATGACCC[A/G]TGAGTACATACCCCTCACGAAAAAATGTGTGCAGGTTCAGCAGTCAGGAA
416	AM_10803	CYP1A2*6_5090C>T(R431W)	rs28399424	snp	N	15	75047169	A // B	C // T	N/A	+	+	CYP1A2	PA27093	NM_000761.3|NP_000752.2|C|R|431|coding-nonsynonymous|T|W|431	GTTCCTCTTGCAGAGAGCTGTGGGAGGACCCCTCTGAGTTCCGGCCTGAG[C/T]GGTTCCTCACCGCCGATGGCACTGCCATTAACAAGCCCTTGAGTGAGAAG
417	AM_10805	CYP1A2*8_5166G>A(R456H)	rs72547517	snp	N	15	75047245	A // B	A // G	N/A	+	+	CYP1A2	PA27093	NM_000761.3|NP_000752.2|G|R|456|coding-nonsynonymous|A|H|456	CATTAACAAGCCCTTGAGTGAGAAGATGATGCTGTTTGGCATGGGCAAGC[A/G]CCGGTGTATCGGGGAAGTCCTGGCCAAGTGGGAGATCTTCCTCTTCCTGG
418	AM_10807	CYP1A2_5347T>C(N516N)	rs2470890	snp	N	15	75047426	A // B	T // C	N/A	+	+	CYP1A2	PA27093	NM_000761.3|NP_000752.2|T|N|516|coding-synonymous|C|N|516	TGGCTGGCCCCCACTCGCTCCCTGGCCTCAGAATGGTGGTGTCTTCTTCA[A/G]TTGATGGAGAAGCGCAGCCGCGCCTGGACATGTTCACAGCGGGCGTGCTT
419	AM_10808	SLC28A1_c.9C>T(N3N)	rs8187737	snp	N	15	85431000	A // B	C // T	N/A	+	+	SLC28A1	PA387	NM_004213.3|NP_004204.3|C|N|3|coding-synonymous|T|N|3	TGGGCGCTCCCTGATTTGTCTTTCAGCTGGAAGGTCTGGGACATGGAGAA[C/T]GACCCCTCGAGACGAAGAGAGTCCATCTCTCTCACACCTGTGGCCAAGGG
420	AM_10809	SLC28A1_c.38C>G(S13C)	rs17215968	snp	N	15	85431029	A // B	C // G	N/A	+	+	SLC28A1	PA387	NM_004213.3|NP_004204.3|C|S|13|coding-nonsynonymous|G|C|13	GAAGGTCTGGGACATGGAGAACGACCCCTCGAGACGAAGAGAGTCCATCT[C/G]TCTCACACCTGTGGCCAAGGGTCTGGAGAACATGGGGGCTGATTTCTTGG
421	AM_10810	SLC28A1_c.124T>C(L42L)	rs17222302	snp	N	15	85432030	A // B	C // T	N/A	+	+	SLC28A1	PA387	NM_004213.3|NP_004204.3|T|L|42|coding-synonymous|C|L|42	TGACGGCTCCCTGCGGGCTGTAGGAGGAAGGCCAGCTCCCTAGGAGTGAC[C/T]TGAGCCCCGCAGAGATCAGGAGCAGCTGGAGCGAGGCGGCGCCGAAGCCC
422	AM_10812	SLC28A1_c.132C>G(P44P)	rs17215892	snp	N	15	85432038	A // B	C // G	N/A	+	+	SLC28A1	PA387	NM_004213.3|NP_004204.3|C|P|44|coding-synonymous|G|P|44	CCCTGCGGGCTGTAGGAGGAAGGCCAGCTCCCTAGGAGTGACTTGAGCCC[C/G]GCAGAGATCAGGAGCAGCTGGAGCGAGGCGGCGCCGAAGCCCTTCTCCAG
423	AM_10813	SLC28A1_c.295C>T(L99L)	rs8187751	snp	N	15	85438188	A // B	T // C	N/A	+	+	SLC28A1	PA387	NM_004213.3|NP_004204.3|C|L|99|coding-synonymous|T|L|99	GAGGACAAACAGAGCCAGGGCCCTCTGGAAATCCAGGAGGCAGGCCACCA[A/G]CAGGAAGGCAGAGAGCCCTGGGGGATGAGACAGAGGAGGGGTCAACAGCC
424	AM_10814	SLC28A1_c.388C>G(R130G)	rs2277577	snp	N	15	85438281	A // B	G // C	N/A	+	+	SLC28A1	PA387	NM_004213.3|NP_004204.3|C|R|130|coding-nonsynonymous|G|G|130	GGGATGGCCCTGAGGCTTGAGAAACCTCCTCAGCTTTGGCCCCAGAAGCC[C/G]TTTCAGCAGGCGGTGGCCCAGGAAGGTGAGGACCACACAGGTGAGGACAA
425	AM_10816	SLC28A1_c.565G>A(V189I)	rs2290272	snp	N	15	85447431	A // B	G // A	N/A	+	+	SLC28A1	PA387	NM_004213.3|NP_004204.3|G|V|189|coding-nonsynonymous|A|I|189	ACTAGCACTCACTGCGCAATGATGCTTTGAGCAGGCAAAGAGGAGAGCGA[C/T]GAACACGCAGATTCCTGCGAAGGACACCAGTTGCTCAGGCCGCTGGGAGG
426	AM_10817	SLC28A1_c.568G>T(A190S)	rs45523532	snp	N	15	85447434	A // B	G // T	N/A	+	+	SLC28A1	PA387	NM_004213.3|NP_004204.3|G|A|190|coding-nonsynonymous|T|S|190	CCCAGCGGCCTGAGCAACTGGTGTCCTTCGCAGGAATCTGCGTGTTCGTC[G/T]CTCTCCTCTTTGCCTGCTCAAAGCATCATTGCGCAGTGAGTGCTAGTTGT
427	AM_10818	SLC28A1_c.630A>T(G210G)	rs8187755	snp	N	15	85448796	A // B	A // T	N/A	+	+	SLC28A1	PA387	NM_004213.3|NP_004204.3|A|G|210|coding-synonymous|T|G|210	GCTTTCTGTTGGGTGGGGTGGTAGGTGTCCTGGAGGGCCGTGTCTTGGGG[A/T]CTTGGACTGCAGTTTGTACTTGGACTCCTCGTCATCAGAACAGAACCAGG
428	AM_10819	SLC28A1_c.689C>T(A230V)	rs17215934	snp	N	15	85448855	A // B	C // T	N/A	+	+	SLC28A1	PA387	NM_004213.3|NP_004204.3|C|A|230|coding-nonsynonymous|T|V|230	GCAGTTTGTACTTGGACTCCTCGTCATCAGAACAGAACCAGGATTCATTG[C/T]GTTCGAGTGGCTGGGCGAGCAGATCCGGGTAGGTATGTGGGGTCTGGCTG
429	AM_10820	SLC28A1_c.709C>A(Q237K)	rs8187758	snp	N	15	85448875	A // B	C // A	N/A	+	+	SLC28A1	PA387	NM_004213.3|NP_004204.3|C|Q|237|coding-nonsynonymous|A|K|237	GTAATCTAAGATGCTCTGGGCAGCCAGACCCCACATACCTACCCGGATCT[G/T]CTCGCCCAGCCACTCGAACGCAATGAATCCTGGTTCTGTTCTGATGACGA
430	AM_10822	SLC28A1_c.969A>G(P323P)	rs17222274	snp	N	15	85467227	A // B	A // G	N/A	+	+	SLC28A1	PA387	NM_004213.3|NP_004204.3|A|P|323|coding-synonymous|G|P|323	ACCCCCACCCTGCTTGTCTGACATCTTTCCTGTTTGCAGACCGAGGCTCC[A/G]TTACTGATCCGGCCCTACTTGGCAGACATGACACTCTCTGAAGTCCACGT
431	AM_10823	SLC28A1_c.1017C>T(H339H)	rs3803390	snp	N	15	85467275	A // B	C // T	N/A	+	+	SLC28A1	PA387	NM_004213.3|NP_004204.3|C|H|339|coding-synonymous|T|H|339	CCATTACTGATCCGGCCCTACTTGGCAGACATGACACTCTCTGAAGTCCA[C/T]GTTGTCATGACCGGAGGTTACGCCACCATTGCTGGCAGCCTGCTGGGTGC
432	AM_10824	SLC28A1_c.1098G>A(S366S)	rs17222379	snp	N	15	85476390	A // B	A // G	N/A	+	+	SLC28A1	PA387	NM_004213.3|NP_004204.3|G|S|366|coding-synonymous|A|S|366	ACTGTCCACCTAGAACCTGCACTCTCACTCTTGCAGATCGATGCCACCTC[A/G]TTGATTGCAGCCTCTGTGATGGCTGCCCCTTGTGCCTTGGCCCTCTCCAA
433	AM_10825	SLC28A1_c.1149A>G(K383K)	rs2305367	snp	N	15	85476441	A // B	A // G	N/A	+	+	SLC28A1	PA387	NM_004213.3|NP_004204.3|A|K|383|coding-synonymous|G|K|383	TTGATTGCAGCCTCTGTGATGGCTGCCCCTTGTGCCTTGGCCCTCTCCAA[A/G]CTGGTCTACCCGGAGGTGGAGGAGTCCAAGTTTAGGAGGGAGGAAGGAGT
434	AM_10826	SLC28A1_c.1197A>C(G399G)	rs8042415	snp	N	15	85476489	A // B	A // C	N/A	+	+	SLC28A1	PA387	NM_004213.3|NP_004204.3|A|G|399|coding-synonymous|C|G|399	AAGCTGGTCTACCCGGAGGTGGAGGAGTCCAAGTTTAGGAGGGAGGAAGG[A/C]GTGAAACTGACCTATGGGTGAGCACAGCAGGAGGTCCTGCAGACAGGGTA
435	AM_10827	SLC28A1_c.1234G>C(E412Q)	rs17222386	snp	N	15	85478276	A // B	C // G	N/A	+	+	SLC28A1	PA387	NM_004213.3|NP_004204.3|G|E|412|coding-nonsynonymous|C|Q|412	CAGTAATGATCATTCTTGATCCCAACAACAGAGATGCTCAGAACCTCATA[C/G]AAGCAGCCAGCACTGGGGCCGCCATCTCCGTGAAGGTGGTCGCCAACATC
436	AM_10829	SLC28A1_c.1368G>A(Q456Q)	rs2242048	snp	N	15	85478410	A // B	A // G	N/A	+	+	SLC28A1	PA387	NM_004213.3|NP_004204.3|G|Q|456|coding-synonymous|A|Q|456	GACTTTATCAATGCTGCCCTCTCCTGGCTGGGAGACATGGTGGACATCCA[A/G]GGGCTCAGCTTCCAGGTGCGTTTCTGGCCACCACACTCAGTCTGTAGAGA
437	AM_10830	SLC28A1_c.1405C>A(R469R)	rs8187779	snp	N	15	85478573	A // B	A // C	N/A	+	+	SLC28A1	PA387	NM_004213.3|NP_004204.3|C|R|469|coding-synonymous|A|R|469	CGGTGCCAGCCATACCGTTGTGCCCTCAGCTCATCTGCTCCTACATCCTG[A/C]GGCCTGTAGCCTTCTTGATGGGTGTGGCGTGGGAGGACTGCCCAGTGGTA
438	AM_10832	SLC28A1_c.1561G>A(D521N)	rs2242046	snp	N	15	85478729	A // B	G // A	N/A	+	+	SLC28A1	PA387	NM_004213.3|NP_004204.3|G|D|521|coding-nonsynonymous|A|N|521	CTGCTGCAGGGAAGGGACTGGGACACTCACGGAGATCCACTGCTTCCTGT[C/T]GCCGACCCACTCCTCGGCCCCTGCCAGGCGGCGTTGCTTGTACTTGGAGA
439	AM_10833	SLC28A1_c.1636T>C(S546P)	rs45584739	snp	N	15	85486730	A // B	C // T	N/A	+	+	SLC28A1	PA387	NM_004213.3|NP_004204.3|T|S|546|coding-nonsynonymous|C|P|546	GAGCTGAAGTCCTCACGACGTTTGCCCTCTGTGGATTTGCCAATTTCAGC[C/T]CCATTGGGATCATGCTGGGAGGCTTGAGTGAGTCTAATCAGGGCCTCACC
440	AM_10834	SLC28A1_c.1821C>T(T607T)	rs17222267	snp	N	15	85488045	A // B	C // T	N/A	+	+	SLC28A1	PA387	NM_004213.3|NP_004204.3|C|T|607|coding-synonymous|T|T|607	TACATGCCCAGGGGGGCTGAAGTTGACTGCATGTCCCTCTTGAACACGAC[C/T]CTCAGCAGCAGTAGCTTTGAGATTTACCAGTGCTGCCGTGAGGCCTTCCA
441	AM_10835	SLC28A1_c.1880A>G(N627S)	rs72547519	snp	N	15	85488361	A // B	A // G	N/A	+	+	SLC28A1	PA387	NM_004213.3|NP_004204.3|A|N|627|coding-nonsynonymous|G|S|627	GAACCAGGCCTGGAGCTCCCACTGCGATCTTTGCTTTCTTTTTAGCGTCA[A/G]TCCAGAGTTCAGCCCAGAGGCCCTGGACAACTGCTGTCGGTTTTACAACC
442	AM_10836	SLC28A1_c.1903C>G(L635V)	rs17222421	snp	N	15	85488384	A // B	C // G	N/A	+	+	SLC28A1	PA387	NM_004213.3|NP_004204.3|C|L|635|coding-nonsynonymous|G|V|635	GCGATCTTTGCTTTCTTTTTAGCGTCAATCCAGAGTTCAGCCCAGAGGCC[C/G]TGGACAACTGCTGTCGGTTTTACAACCACACGATCTGTGCACAGTGAGGA
443	AM_10837	SLC28A1_c.*8A>G	rs72547520	snp	N	15	85488439	A // B	A // G	N/A	+	+	SLC28A1	PA387	NM_004213.3|||||mrna-utr|||	CAACTGCTGTCGGTTTTACAACCACACGATCTGTGCACAGTGAGGACAGA[A/G]CATGCTTGTGCTTCTGCGCTTCTGAGGGCTGTTCTCCCCCGGGAACCATC
444	AM_10838	SLC28A1_c.*25C>T	rs17222428	snp	N	15	85488456	A // B	C // T	N/A	+	+	SLC28A1	PA387	NM_004213.3|||||mrna-utr|||	ACAACCACACGATCTGTGCACAGTGAGGACAGAACATGCTTGTGCTTCTG[C/T]GCTTCTGAGGGCTGTTCTCCCCCGGGAACCATCTGTCCCCACCTTCCCTT
445	AM_10839	SLC28A1_c.*141G>T	rs8025045	snp	N	15	85488572	A // B	G // T	N/A	+	+	SLC28A1	PA387	NM_004213.3|||||mrna-utr|||	CAGGGAAGCCACAGGACTTAGACCCAGCTCAATCCCACAATTGGGAAGGG[G/T]TCATGGAGTGAGTGTGCAGAGAGTGAGTGAGGACATAAGGAAGGACATGT
446	AM_10851	SLCO3A1_c.604_605AT>TA(I202Y)	rs72547521	snp	N	15	92459646	A // B	AT // TA	N/A	+	+	SLCO3A1	PA35837	NM_013272.3|NP_037404.2|AT|I|202|coding-nonsynonymous|TA|Y|202	TGCTCCTGGGCATCGGTGCTACCCCTGTGCAGCCCCTGGGCGTCTCCTAC[AT/TA]CGACGACCACGTGCGGAGGAAGGACTCCTCGCTCTATATAGGTAGGAGCT
447	AM_10890	SLCO3A1_c.882G>C(E294D)	rs1517618	snp	N	15	92647645	A // B	G // C	N/A	+	+	SLCO3A1	PA35837	NM_013272.3|NP_037404.2|G|E|294|coding-nonsynonymous|C|D|294	CTCTCGTATTCTCTTTCGGAGAGCATGGCCTGCTCGCTTTCCATGGCGGG[C/G]TCTGAGTGCGGGGGCAGGGACTGTGGAAACCCAAACATCAAGAGGGAAGA
448	AM_10899	SLCO3A1_c.1513-5136A>G	rs2190748	snp	N	15	92685078	A // B	A // G	N/A	+	+	SLCO3A1	PA35837	NM_013272.3|NP_037404.2||||intron|||	CCCTTAGCACAACGTTGGACAAATCTGGGCTCTTATGTCACACAAGCCCA[A/G]TAAAGGAGCTTCCTACCCCTTGCCATCTGACCACAACTGCAGCATTTTCC
449	AM_10900	SLCO3A1_c.1513-1102G>A	rs2283458	snp	N	15	92689112	A // B	A // G	N/A	+	+	SLCO3A1	PA35837	NM_013272.3|NP_037404.2||||intron|||	CCTTCCCCCATGAATAAAAGCCCCTGTTGGGGGCACAGCGATACAGACTG[A/G]CCCTGTTGGGTTTGGGGCACATGAACACTTTCAGACACCCCTGAAACCAT
450	AM_10902	SLCO3A1_c.1753+4399C>G	rs960440	snp	N	15	92698643	A // B	G // C	N/A	+	+	SLCO3A1	PA35837	NM_013272.3|NP_037404.2||||intron|||	TAACTCTTCCAACCCCACACCTTCCCCACACTTGCTTTGTTCTCCTACTG[C/G]AGCCGCCAGAGGCAGGATATTGGCACCTACTTATCTGTGCACCCTGAGCA
451	AM_10903	SLCO3A1_c.*1204G>A	rs3743369	snp	N	15	92707569	A // B	A // G	N/A	+	+	SLCO3A1	PA35837	NM_013272.3|||||mrna-utr|||	AAGAATATACAATGTGTTACAAGAAGAAAAAAAAATGCTTCAAAAAGAGA[A/G]TGTATATGCAGCCTGCCTTTAAAAGAATCACATTTGAGACAACAGGGGAT
452	AM_10911	TPSG1_c.342_343insA(-115S)	rs35454573	in-del	N	16	1272820	A // B	- // A	N/A	-	-	TPSG1	PA37849	NM_012467.2|NP_036599.2|-|-|115|coding-nonsynonymous|A|S|115	ATCACTCTGTCTCCCCACTTCTCCACCGTGAGGCAGATCATCCTGCACTCC[-/A]AGCCCCTCAGGACAGCCGGGGACCAGCGGGGACATCGCCCTGGTGGAGCT
453	AM_10913	TPSG1_c.74-209A>G	rs909921	snp	N	16	1273803	A // B	G // A	N/A	-	-	TPSG1	PA37849	NM_012467.3|NP_036599.3||||intron|||	GCAGAAATGACGTCTCAGGAGCAGTGAGCGCGCCTGGGGCTCAGGTCGTC[C/T]TTTCTAAGCACCATGCTCCACAAACTAACCAGGGCTCCCGGAGGCGGTGG
454	AM_10915	ABCC1_c.275C>T(S92F)	rs8187844	snp	N	16	16103682	A // B	C // T	N/A	+	+	ABCC1	PA244	NM_019898.2|NP_063953.2|C|S|92|coding-nonsynonymous|T|F|92	GGCCTTGGGATTTTTGCTGTGGATCGTCTGCTGGGCAGACCTCTTCTACT[C/T]TTTCTGGGAAAGAAGTCGGGGCATATTCCTGGCCCCAGTGTTTCTGGTCA
455	AM_10917	ABCC1_c.689G>A(R230Q)	rs8187848	snp	N	16	16130340	A // B	G // A	N/A	+	+	ABCC1	PA244	NM_019898.2|NP_063953.2|G|R|230|coding-nonsynonymous|A|Q|230	CCTTGTTTAAGGACCAGAGGTCACTGCCCTCCAGGGGCTGGCGGTAGCCC[C/T]GGACAATCAACCTGGGGCCAAGACACAAGGGGGTTAGGCAATGAGAGTCA
456	AM_10920	ABCC1_c.825T>C(V275V)	rs246221	snp	N	16	16138322	A // B	C // T	N/A	+	+	ABCC1	PA244	NM_019898.2|NP_063953.2|T|V|275|coding-synonymous|C|V|275	AGACCCCACAACGGCTTCACCTCCTTGTGTTCCAGGCAGCCGGTGAAGGT[C/T]GTGTACTCCTCCAAGGATCCTGCCCAGCCGAAAGAGAGTTCCAAGGTGGA
457	AM_10922	ABCC1_c.1057G>A(V353M)	rs8187852	snp	N	16	16139709	A // B	A // G	N/A	+	+	ABCC1	PA244	NM_019898.2|NP_063953.2|G|V|353|coding-nonsynonymous|A|M|353	AGTCATTCCAGGCCCTCTCTTTGCTCCTTTGCAGGTTGCTCATCAAGTTC[A/G]TGAATGACACGAAGGCCCCAGACTGGCAGGGCTACTTCTACACCGTGCTG
458	AM_10924	ABCC1_c.1068G>A(T356T)	rs8187853	snp	N	16	16139720	A // B	G // A	N/A	+	+	ABCC1	PA244	NM_019898.2|NP_063953.2|G|T|356|coding-synonymous|A|T|356	GTGACAAACAGCAGCACGGTGTAGAAGTAGCCCTGCCAGTCTGGGGCCTT[C/T]GTGTCATTCACGAACTTGATGAGCAACCTGCAAAGGAGCAAAGAGAGGGC
459	AM_10925	ABCC1_c.1299G>T(R433S)	rs60782127	snp	N	16	16142079	A // B	G // T	N/A	+	+	ABCC1	PA244	NM_019898.2|NP_063953.2|G|R|433|coding-nonsynonymous|T|S|433	TCCTCCACGGTCGGGGAGATTGTCAACCTCATGTCTGTGGACGCTCAGAG[G/T]TTCATGGACTTGGCCACGTACATTAACATGATCTGGTCAGCCCCCCTGCA
460	AM_10926	ABCC1_c.1577A>CorCA(D526AorX)	rs72547522	in-del	N	16	16150052	A // B // C	A // C // CA	N/A	+	+	ABCC1	PA244	NM_019898.2|NP_063953.2|A|D|526|coding-nonsynonymous|C|A|526	CAATGGGATCAAAGTGCTAAAGCTTTATGCCTGGGAGCTGGCATTCAAGG[A/C/CA]CAAGGTGCTGGCCATCAGGCAGGAGGAGCTGAAGGTGCTGAAGAAGTCTG
461	AM_10928	ABCC1_c.1704C>T(Y568Y)	rs8187858	snp	N	16	16162039	A // B	C // T	N/A	+	+	ABCC1	PA244	NM_019898.2|NP_063953.2|C|Y|568|coding-synonymous|T|Y|568	CAGCACTGGGCGTTCTGCTTGCAGGTGGCCTTGTGCACATTTGCCGTCTA[C/T]GTGACCATTGACGAGAACAACATCCTGGATGCCCAGACAGCCTTCGTGTC
462	AM_10929	ABCC1_c.1911C>T(D637D)	rs8187859	snp	N	16	16165585	A // B	C // T	N/A	+	+	ABCC1	PA244	NM_019898.2|NP_063953.2|C|D|637|coding-synonymous|T|D|637	TCCCATGAGGAGCTGGAACCTGACAGCATCGAGCGACGGCCTGTCAAAGA[C/T]GGTGTGTGTGTGTTCAGTCCTGGCTTCTGGAAGTGGCCGCCTTCCCATCT
463	AM_10930	ABCC1_c.2001C>T(S667S)	rs8187863	snp	N	16	16173221	A // B	C // T	N/A	+	+	ABCC1	PA244	NM_019898.2|NP_063953.2|C|S|667|coding-synonymous|T|S|667	TTCAGCGTGGCTGAGCCAGGTGTGTTGTGTCGTTTCAGCATCACCTTCTC[C/T]ATCCCCGAAGGTGCTTTGGTGGCCGTGGTGGGCCAGGTGGGCTGCGGAAA
464	AM_10931	ABCC1_c.2007C>T(P669P)	rs2301666	snp	N	16	16173227	A // B	C // T	N/A	+	+	ABCC1	PA244	NM_019898.2|NP_063953.2|C|P|669|coding-synonymous|T|P|669	GTGGCTGAGCCAGGTGTGTTGTGTCGTTTCAGCATCACCTTCTCCATCCC[C/T]GAAGGTGCTTTGGTGGCCGTGGTGGGCCAGGTGGGCTGCGGAAAGTCGTC
465	AM_10932	ABCC1_c.2168G>A(R723Q)	rs4148356	snp	N	16	16177275	A // B	G // A	N/A	+	+	ABCC1	PA244	NM_019898.2|NP_063953.2|G|R|723|coding-nonsynonymous|A|Q|723	CGGACCTGTAATATGGTTCCTCCAGCTGACATCCAAAAAGGATGTTTTCT[C/T]GGAGAGAATCATTCTGAATCCAGGCCTGCTGTGGCACATAGGCCACGGAG
466	AM_10936	ABCC1_c.3282G>A(P1094P)	rs4148377	snp	N	16	16215891	A // B	G // A	N/A	+	+	ABCC1	PA244	NM_019898.2|NP_063953.2|G|P|1094|coding-synonymous|A|P|1094	GCTCGAATGACGCTGACCCCCAGCAAGGTCTCGTTGAAATGGGAATAGAC[C/T]GGGGAGCGGCTGACCGACTCGAGGCGCTTCAGCTGCCGGGAGGAAGCCAC
467	AM_10939	ABCC1_c.4034C>T(T1345M)	rs8057331	snp	N	16	16230411	A // B	C // T	N/A	+	+	ABCC1	PA244	NM_019898.2|NP_063953.2|C|T|1345|coding-nonsynonymous|T|M|1345	CCGAATGAACCTGGACCCATTCAGCCAGTACTCGGATGAAGAAGTCTGGA[C/T]GTCCCTGGAGCTGGCCCACCTGAAGGACTTCGTGTCAGCCCTTCCTGACA
468	AM_10944	ABCC1_c.*866T>A	rs212090	snp	N	16	16236004	A // B	T // A	N/A	+	+	ABCC1	PA244	NM_019898.2|||||mrna-utr|||	TCCCATGAGGCCATCTCCTTAATATTTACCCCACATCAATCATGGTGGGA[A/T]CAGTAATAACAGCATTGATTGTTCTTACAATGTTGAACAAAAGAAAAAAG
469	AM_10945	ABCC1_c.*1293G>A	rs4148380	snp	N	16	16236431	A // B	G // A	N/A	+	+	ABCC1	PA244	NM_019898.2|NP_063953.2||||locus-region|||	AACAGTACTTAAAAAAAAAAAATCATTGATATTCAAAGATGGGTTCTTTT[C/T]GTGTCCTGGAAGAGCATCAGTAACTAAATATCAAGTTCTCCACAATGCTG
470	AM_10946	ABCC1_c.*1385G>T	rs8056298	snp	N	16	16236523	A // B	G // T	N/A	+	+	ABCC1	PA244	NM_019898.2|NP_063953.2||||locus-region|||	AGTACTGTTCCGGGGAGAAAAACAGTCTCAAAACTTGAACTTCTTGGGAA[G/T]AGAAGTGTTGGGCTGAGAAGTAACATTCCCAGGAAATAGTGAGAAGCTCG
471	AM_10947	ABCC1_c.*1512T>C	rs212091	snp	N	16	16236650	A // B	C // T	N/A	+	+	ABCC1	PA244	NM_019898.2|NP_063953.2||||locus-region|||	CTGTGTTCCTGGAAGAAAACAGGGAAGCAGCATCTTTTAAAGCCTGTTCT[C/T]TAAGGTGTCTCGTTAGAGCCCAAAGTGGAATCCGGAAGGCAGCCAGAGCT
472	AM_10959	ABCC6_c.3803G>A(R1268Q)	rs2238472	snp	N	16	16251599	A // B	G // A	N/A	-	-	ABCC6	PA58	NM_001171.5|NP_001162.4|G|R|1268|coding-nonsynonymous|A|Q|1268	CGCCCTGCACAGCCAGCGGGAGCTCAGGTCGGTATCTTAGCCCAAAGTCC[C/T]GGAACTCGATCTGCCCGCCCTGAGGCCAGGGGGGCTGAGCTGCACATGTG
473	AM_10964	ABCC6_c.2835C>T(P945P)	rs2856585	snp	N	16	16263663	A // B	T // C	N/A	-	-	ABCC6	PA58	NM_001171.5|NP_001162.4|C|P|945|coding-synonymous|T|P|945	AAGGAGGCCACTTGCTGGCAGAGGAAGAGGAAGAGTGCGTAGAGGCAGAG[A/G]GGGGTGCCCACGGCACGCAGGTAGGCCAGGTGCACTGTGGCCTTCACCTG
474	AM_10966	ABCC6_c.2542G>A(V848M)	rs6416668	snp	N	16	16271357	A // B	G // A	N/A	-	-	ABCC6	PA58	NM_001171.5|NP_001162.4|G|V|848|coding-nonsynonymous|A|M|848	ACCTCCTTCTCCTCTATCTCCTGGCTGTCTGGCTTGATCCAGAAGACACA[C/T]GAGGGCCCCCTTCCTCTGCAGAAGCTCCTGGTAGGAACCCATCTCTGCGA
475	AM_10968	ABCC6_c.2400G>A(G800G)	rs7500834	snp	N	16	16272670	A // B	A // G	N/A	-	-	ABCC6	PA58	NM_001171.5|NP_001162.4|G|G|800|coding-synonymous|A|G|800	GATGCCCACGTTGGCCAGCATGTCTTCAACCAGGTCATTGGGCCTGGTGG[A/G]CTACTCCAGGGAACAGTAAGTTTGGGAACATGTGTCAGACAGTACAGGGC
476	AM_10976	ABCC6_c.1994T>C(V665A)	rs4341770	snp	N	16	16276737	A // B	T // C	N/A	-	-	ABCC6	PA58	NM_001171.5|NP_001162.4|T|V|665|coding-nonsynonymous|C|A|665	TTGACAGCTCCCCAAGGAGGGCGGACAGCAGGGAGGACTTCCCTGCCCCC[A/G]CTGGACCGACAACAGCCAGCAGACAGCCCTGGGGCACCGTGAGGTTTATT
477	AM_10977	ABCC6_c.1896C>A(H632Q)	rs8058694	snp	N	16	16278863	A // B	C // A	N/A	-	-	ABCC6	PA58	NM_001171.5|NP_001162.4|C|H|632|coding-nonsynonymous|A|Q|632	TACCTGTGGAGGCAGGGAGGGCTTTCCTGGGACCAGGCGAAGGTGGCACT[G/T]TGTATGGTGATGCAATCCTTCCCGGCAGCTGCAGGGCACAAGAGGCCATT
478	AM_10978	ABCC6_c.1890C>G(T630T)	rs8058696	snp	N	16	16278869	A // B	C // G	N/A	-	-	ABCC6	PA58	NM_001171.5|NP_001162.4|C|T|630|coding-synonymous|G|T|630	CCTGTAAATGGCCTCTTGTGCCCTGCAGCTGCCGGGAAGGATTGCATCAC[C/G]ATACACAGTGCCACCTTCGCCTGGTCCCAGGAAAGCCCTCCCTGCCTCCA
479	AM_10985	SULT1A2_c.888A>G(R296R)	rs11401	snp	N	16	28602991	A // B	A // G	N/A	N/A	N/A	SULT1A2	PA341	NM_138414.2||||||||	GACACCTCCTATGCAGATGGCTATTCCCCTCCCCTCAATGTGGCTCAGAG[A/G]TACGTGGTGGCTTGTAAGGAACCCAAGAAAAAGTGATGCCGCCTGGCAGA
480	AM_10988	SULT1A2_c.716A>G(N239S)	rs45472392	snp	N	16	28603643	A // B	A // G	N/A	-	-	SULT1A2	PA341	NM_177528.1|NP_803564.1|A|N|239|coding-nonsynonymous|G|S|239	CATGGTTGAGCACACGTCGTTCAAGGAGATGAAGAAGAACCCTATGACCA[A/G]CTACACCACCGTCCGCCGGGAGTTCATGGACCACAGCATCTCCCCCTTCA
481	AM_10989	SULT1A2_c.704A>C(N235T)	rs1059491	snp	N	16	28603655	A // B	A // C	N/A	-	-	SULT1A2	PA341	NM_177528.1|NP_803564.1|A|N|235|coding-nonsynonymous|C|T|235	GACTGTGGACCTCATGGTTGAGCACACGTCGTTCAAGGAGATGAAGAAGA[A/C]CCCTATGACCAACTACACCACCGTCCGCCGGGAGTTCATGGACCACAGCA
482	AM_10996	SULT1A2_c.56C>T(P19L)	rs10797300	snp	N	16	28607196	A // B	C // T	N/A	-	-	SULT1A2	PA341	NM_177528.1|NP_803564.1|C|P|19|coding-nonsynonymous|T|L|19	GCTGATCCAGGACATCTCTCGCCCGCCACTGGAGTACGTGAAGGGGGTCC[C/T]GCTCATCAAGTACTTTGCAGAGGCACTGGGGCCCCTGCAGAGCTTCCAGG
483	AM_10997	SULT1A2_c.20C>T(T7I)	rs1136703	snp	N	16	28607232	A // B	T // C	N/A	-	-	SULT1A2	PA341	NM_177528.1|NP_803564.1|C|T|7|coding-nonsynonymous|T|I|7	AGTACTTGATGAGCGGGACCCCCTTCACGTACTCCAGTGGCGGGCGAGAG[A/G]TGTCCTGGATCAGCTCCATGTTCCTGCGTCAGGGGCCAGAGCCAGGCCCG
484	AM_11004	SULT1A1*3_c.667A>G(M223V)	rs1801030	snp	Y	16	28617485	A // B	A // G	N/A	-	-	SULT1A1	PA343	NM_001055.2|NP_001046.2|A|M|223|coding-nonsynonymous|G|V|223	AGATCCTGGAGTTTGTGGGGCGCTCCCTGCCAGAGGAGACCGTGGACTTC[A/G]TGGTTCAGCACACGTCGTTCAAGGAGATGAAGAAGAACCCTATGACCAAC
485	AM_11005	SULT1A1*2_c.638G>A(R213H)	rs9282861	snp	Y	16	28617514	A // B	A // G	N/A	-	-	SULT1A1	PA343	NM_001055.2|NP_001046.2|G|R|213|coding-nonsynonymous|A|H|213	TGCTCAGAACCCGAAAAGGGAGATTCAAAAGATCCTGGAGTTTGTGGGGC[A/G]CTCCCTGCCAGAGGAGACCGTGGACTTCGTGGTTCAGCACACGTCGTTCA
486	AM_11012	SULT1A1*4_c.110G>A(R37Q)	rs72547527	snp	Y	16	28620067	A // B	G // A	N/A	-	-	SULT1A1	PA343	NM_001055.2|NP_001046.2|G|R|37|coding-nonsynonymous|A|Q|37	CTCCTCACTTACCGGACTTGGGGTAGGTGCTGATGAGCAGGTCATCAGGC[C/T]GGGCCTGGAAGCTCTGCAGGGGCCCCAGTGCCTCTGCAAAGTACTTGATG
487	AM_11016	SULT1A3_C>T>A(P101LorH)_alternate	rs67944833	snp	N	16	29473201	A // B // C	A // C // T	N/A	+	+	SULT1A3	PA344	NM_003166.3|NP_003157.1|C|P|101|coding-nonsynonymous|T|L|101	ACCTTCCCTGACCCACTACTCAGGGCTGGAGACTCTGAAAGACACACCGC[A/C/T]CCCACGGCTCATCAAGTCACACCTGCCCCTGGCTCTGCTCCCTCAGACTC
488	AM_11017	SULT1A3_C>T(R144C)_alternate	rs67878449	snp	N	16	29474723	A // B	C // T	N/A	+	+	SULT1A3	PA344	NM_003166.3|NP_003157.1|C|R|144|coding-nonsynonymous|T|C|144	ATGTTGCCCGAAACCCAAAGGACGTGGCGGTCTCCTACTACCATTTCCAC[C/T]GTATGGAAAAGGCGCACCCTGAGCCTGGGACCTGGGACAGCTTCCTGGAA
489	AM_11018	SULT1A3_G>T(K234N)_alternate	rs35044222	snp	N	16	29475588	A // B	G // T	N/A	+	+	SULT1A3	PA344	NM_003166.3|NP_003157.1|G|K|234|coding-nonsynonymous|T|N|234	GAGACCATGGACTTCATGGTTCAGCACACGTCGTTCAAGGAGATGAAGAA[G/T]AACCCTATGACCAACTACACCACCGTCCCCCAGGAGCTCATGGACCACAG
490	AM_11021	CA5P_G>T(rs1364182)	rs1364182	snp	N	16	29656093	A // B	G // T	N/A	N/A	N/A	CA5P		||||||||	ACAGACTCTACATATGTAGGAAGCAGGCATCATGGAGAAACATCACGCAG[G/T]AAAGTGGGGGAAGGAAGTGCTCCTTTCTACAGGCTGATGTCTCTGAGAAG
491	AM_11022	CA5P_A>G(rs11859842)	rs11859842	snp	N	16	29661217	A // B	A // G	N/A	N/A	N/A	CA5P		||||||||	CATCCTGGGCACTGACCCCTTCCTTCTTCAGCTCCAGCAAAGTCTGACCA[A/G]TCTAAAGTAACCACTCCCCTTCTGCCCACGATTGCATTAGGAAAGGGTAC
492	AM_11023	CA5P_C>T(rs11150564)	rs11150564	snp	N	16	29666736	A // B	C // T	N/A	N/A	N/A	CA5P		||||||||	CCCTCCCTCTGGACTGTAACCCCCCTCCTTGCTTTCTCCCCATAGCACTT[C/T]GCGCCTTCAAATGCGCCATGTAATGGACTTTCTTATTTTGCTTCCGTCGC
493	AM_11024	SPN_G>A(rs4788172)	rs4788172	snp	N	16	29668253	A // B	A // G	N/A	N/A	N/A	SPN		||||||||	GGGCGTGGATGGCAGGGCCATGGGTGGAAGGGCAGAAGCAACGTGGATAA[A/G]AGAGGTAGGCAGGGGTCAGATCGGATGTGGCCAACTTGGCTTCTACCCTG
494	AM_11025	QPRT_T>C(rs3862476)	rs3862476	snp	N	16	29687360	A // B	C // T	N/A	N/A	N/A	QPRT		||||||||	ATAGTCAGGGCAGGCTAACTGCTGTAAGAAACAGTGCCCCCACATCTCAG[C/T]GGTATAACTCAAAAGAAGTTTTTTCCTTCTTATGACAGTCAATTCCTGAC
495	AM_11026	QPRT_T>G(rs13331798)	rs13331798	snp	N	16	29747291	A // B	G // T	N/A	N/A	N/A	QPRT		||||||||	TGTTTGGAGGTGCTGATGGGGGGCAGAAAGGAGCCTAGGAGAAAGAAGAG[G/T]ATTAGGCTTGGTGGGGGTGGTCATGCATCCTAAAATAATTTTGAGGTCTT
496	AM_11027	SULT1A3_C>T>A(P101LorH)	rs67944833	snp	N	16	30212544	A // B // C	A // C // T	N/A	+	+	SULT1A3	PA344	NM_003166.3|NP_003157.1|C|P|101|coding-nonsynonymous|T|L|101	ACCTTCCCTGACCCACTACTCAGGGCTGGAGACTCTGAAAGACACACCGC[A/C/T]CCCACGGCTCATCAAGTCACACCTGCCCCTGGCTCTGCTCCCTCAGACTC
497	AM_11028	SULT1A3_C>T(R144C)	rs67878449	snp	N	16	30214068	A // B	C // T	N/A	+	+	SULT1A3	PA344	NM_003166.3|NP_003157.1|C|R|144|coding-nonsynonymous|T|C|144	ATGTTGCCCGAAACCCAAAGGACGTGGCGGTCTCCTACTACCATTTCCAC[C/T]GTATGGAAAAGGCGCACCCTGAGCCTGGGACCTGGGACAGCTTCCTGGAA
498	AM_11029	SULT1A3_G>T(K234N)	rs35044222	snp	N	16	30214933	A // B	G // T	N/A	+	+	SULT1A3	PA344	NM_003166.3|NP_003157.1|G|K|234|coding-nonsynonymous|T|N|234	GAGACCATGGACTTCATGGTTCAGCACACGTCGTTCAAGGAGATGAAGAA[G/T]AACCCTATGACCAACTACACCACCGTCCCCCAGGAGCTCATGGACCACAG
499	AM_11032	PRSS53_c.89A>G(Q30R)	rs11150606	snp	N	16	31099011	A // B	G // A	N/A	-	-	PRSS53	PA133787052	NM_001039503.2|NP_001034592.1|A|Q|30|coding-nonsynonymous|G|R|30	CGCCAGGGACTGTGTTGCCCTCCTGAGGCTTGGGGGGGCCGGGGCCACGC[C/T]GTCCACAGGCTGTGGAAAGGAGTTAGTCACACTGACAGCAGATACCTGTC
500	AM_11034	VKORC1_c.*134G>A(3'UTR)	rs7294	snp	N	16	31102321	A // B	A // G	N/A	-	-	VKORC1	PA133787052	NM_024006.4|||||mrna-utr|||	AAGGCCCTAGATGTGGGGCTTCTAGATTACCCCCTCCTCCTGCCATACCC[A/G]CACATGACAATGGACCAAATGTGCCACACGCTCGCTCTTTTTTACACCCA
501	AM_11035	VKORC1_c.*131C>A(3'UTR)	rs11540137	snp	N	16	31102324	A // B	A // C	N/A	-	-	VKORC1	PA133787052	NM_024006.4|||||mrna-utr|||	TAGAAGGCCCTAGATGTGGGGCTTCTAGATTACCCCCTCCTCCTGCCATA[A/C]CCGCACATGACAATGGACCAAATGTGCCACACGCTCGCTCTTTTTTACAC
502	AM_11036	VKORC1_c.383T>G(L128R)	rs104894542	snp	N	16	31102564	A // B	T // G	N/A	-	-	VKORC1	PA133787052	NM_024006.4|NP_076869.1|T|L|128|coding-nonsynonymous|G|R|128	GGCTCACGTTGATAGCATAGGTGGTGATACAAACAATGCAGAAATCATAG[A/C]GCACGAAGAACAGGATCCAGGCCAGGTAGACAGAACCAGCGAGAGACACC
503	AM_11037	VKORC1_c.358C>T(L120L)	rs7200749	snp	N	16	31102589	A // B	T // C	N/A	-	-	VKORC1	PA133787052	NM_024006.4|NP_076869.1|C|L|120|coding-synonymous|T|L|120	GATACAAACAATGCAGAAATCATAGAGCACGAAGAACAGGATCCAGGCCA[A/G]GTAGACAGAACCAGCGAGAGACACCAGGGAGCTCAGCAGCATCAGGACAG
504	AM_11038	VKORC1_c.292C>T(R98W)	rs72547528	snp	N	16	31102655	A // B	C // T	N/A	-	-	VKORC1	PA133787052	NM_024006.4|NP_076869.1|C|R|98|coding-nonsynonymous|T|W|98	CCAGTGCCTGAAGCCCACACCGGACCCTCTTCTGCCTTGCAGGTTGCCTG[C/T]GGACACGCTGGGCCTCTGTCCTGATGCTGCTGAGCTCCCTGGTGTCTCTC
505	AM_11039	VKORC1_c.284-882A>T	rs17884982	snp	N	16	31103545	A // B	T // A	N/A	-	-	VKORC1	PA133787052	NM_024006.4|NP_076869.1||||intron|||	CGCAAAAAAAAAAAAAAAAAAAAAAAAAAAATTAGCTGGGTGCAGTGACA[A/T]GCCTATAGTCCTAGCTACTCAGGAGGATCGCTTGAGCCAGGTTACAGTGA
506	AM_11040	VKORC1_c.283+837C>T	rs2359612	snp	N	16	31103796	A // B	T // C	N/A	-	-	VKORC1	PA133787052	NM_024006.4|NP_076869.1||||intron|||	AAATTTCTTAAATAAATCGGCCAAGTCTGAACCATGTGTCAGCCAGGACC[A/G]TGGTGCTGGGCCTCCCTCAGTGATGCCTTCTCTGGAGCTGGGAAGGGTGA
507	AM_11041	VKORC1_c.283+231G>A	rs17884850	snp	N	16	31104402	A // B	A // G	N/A	-	-	VKORC1	PA133787052	NM_024006.4|NP_076869.1||||intron|||	TTAAGTACTGTTAGAGGCTGAAGGGCCCTTAAAGACATCCTAGGTCCCCA[A/G]GTTTTTTGTTTGTTGTTGTTTTGAGACAGGGTCTGGCTCTGTTGCCCAAA
508	AM_11042	VKORC1_c.283+186T>C	rs17886199	snp	N	16	31104447	A // B	C // T	N/A	-	-	VKORC1	PA133787052	NM_024006.4|NP_076869.1||||intron|||	GGGTGGGGATGTGGGGAGGTAACTAACAGGAGTCTTTTAATTGGTTTAAG[C/T]ACTGTTAGAGGCTGAAGGGCCCTTAAAGACATCCTAGGTCCCCAGGTTTT
509	AM_11043	VKORC1_c.283+124G>C	rs8050894	snp	N	16	31104509	A // B	G // C	N/A	-	-	VKORC1	PA133787052	NM_024006.4|NP_076869.1||||intron|||	TAAAAGACTCCTGTTAGTTACCTCCCCACATCCCCACCCGCAGGACGCTC[C/G]GTGATGAGCAGCTAGCTGGCTGTCAGCTGTGTGGATCACCAAGATTGCAT
510	AM_11044	VKORC1_c.196G>A(V66M)	rs72547529	snp	N	16	31104720	A // B	A // G	N/A	-	-	VKORC1	PA133787052	NM_024006.4|NP_076869.1|G|V|66|coding-nonsynonymous|A|M|66	GTTCCACCCCACCCCACCCCTCTGCCAGGTGGGGCAGGGGTTTCGGGCTG[A/G]TGGAGCATGTGCTGGGACAGGACAGCATCCTCAATCAATCCAACAGCATA
511	AM_11045	VKORC1_c.174-136C>T	rs9934438	snp	N	16	31104878	A // B	T // C	N/A	-	-	VKORC1	PA133787052	NM_024006.4|NP_076869.1||||intron|||	GAAGCCACCTGGGCTATCCTCTGTTCCCCGACCTCCCATCCTAGTCCAAG[A/G]GTCGATGATCTCCTGGCACCGGGCACCTTTGGCCACGTCAGGATTCCATG
512	AM_11046	VKORC1_c.174-429C>T	rs13336384	snp	N	16	31105171	A // B	T // C	N/A	-	-	VKORC1	PA133787052	NM_024006.4|NP_076869.1||||intron|||	GGGTTCAAGCGATTCTCCTGCCTTAGCCCCCCCGAGTAGCTGGGATTAAG[A/G]CACCCGCCATAGCGCCCGATTAATTTTTCTATTTTTGGTAGAGACAGGCT
513	AM_11047	VKORC1_c.173+525C>T	rs17708472	snp	N	16	31105353	A // B	C // T	N/A	-	-	VKORC1	PA133787052	NM_024006.4|NP_076869.1||||intron|||	TCTGCCCCCGACTCCCAGTCTCTGATGCAAAACCGAGTGAACCGTTATAC[C/T]AGCCTTGCCATTTTAAGAATTACTTAAGGGCCGGGCGCGGTGGCCCACTC
514	AM_11048	VKORC1_c.173+486C>A	rs13337470	snp	N	16	31105392	A // B	A // C	N/A	-	-	VKORC1	PA133787052	NM_024006.4|NP_076869.1||||intron|||	CCAGGGAGCTGGAGATTCTGGGGTCCAGGGCAAAGATAATCTGCCCCCGA[A/C]TCCCAGTCTCTGATGCAAAACCGAGTGAACCGTTATACCAGCCTTGCCAT
515	AM_11049	VKORC1_c.173+324T>G	rs2884737	snp	N	16	31105554	A // B	T // G	N/A	-	-	VKORC1	PA133787052	NM_024006.4|NP_076869.1||||intron|||	AGACCGGGCCACCTTGTTCCTGGGCGCAGCCATCGCCAACACCCCCCTTC[A/C]CCTGCGCGCCGTCCTTGAGACCATCGTCAATCTCTACCGCCATCCTGCCT
516	AM_11050	VKORC1_c.172A>G(R58G)	rs104894541	snp	N	16	31105879	A // B	G // A	N/A	-	-	VKORC1	PA133787052	NM_024006.4|NP_076869.1|A|R|58|coding-nonsynonymous|G|G|58	TCCTGGCCGCCCTGCTCCGAGGCCCCACGCCTCCCACTCCCGTGCACACC[C/T]GGAGGAGAAGACGCGCGAACAGCTGATGGCGGTGCCCACGTCGCAGAGCG
517	AM_11051	VKORC1_c.134T>C(V45A)	rs104894540	snp	N	16	31105917	A // B	T // C	N/A	-	-	VKORC1	PA133787052	NM_024006.4|NP_076869.1|T|V|45|coding-nonsynonymous|C|A|45	CCCGTGCACACCTGGAGGAGAAGACGCGCGAACAGCTGATGGCGGTGCCC[A/G]CGTCGCAGAGCGCGCGGTAATCCCGGTCCCGGGCGCGCGCCGCCTTCACG
518	AM_11052	VKORC1_c.85G>T(V29L)	rs104894539	snp	N	16	31105966	A // B	T // G	N/A	-	-	VKORC1	PA133787052	NM_024006.4|NP_076869.1|G|V|29|coding-nonsynonymous|T|L|29	CACGTCGCAGAGCGCGCGGTAATCCCGGTCCCGGGCGCGCGCCGCCTTCA[A/C]GTGCAGCGCGTAGAGCGAGAGCACTAAGCCCGTCAGGCAAAGAGCGAGCC
519	AM_11054	VKORC1_c.-1639G>A(Promoter)	rs9923231	snp	Y	16	31107689	A // B	G // A	N/A	-	-	VKORC1	PA133787052	NM_024006.4||||||||	CCACCTCGGCCTCCCAAAATGCTAGGATTATAGGCGTGAGCCACCGCACC[C/T]GGCCAATGGTTGTTTTTCAGGTCTTCTCTTGCTTGACTTCCCAGAGGGAT
520	AM_11055	VKORC1_c.-1877A>G(Promoter)	rs17878544	snp	N	16	31107927	A // B	A // G	N/A	-	-	VKORC1	PA133787052	NM_024006.4||||||||	GTCAGCTTAATTCCATCTGCAACCTTAATTCCCTTTTGGCCATTTAACCT[A/G]TCATATTCACAAGTTCCAGGGATTCATGCAGGGACATCTTTGGTGACCAT
521	AM_11061	VKORC1_c.-5014T>C(Promoter)	rs17884388	snp	N	16	31111064	A // B	C // T	N/A	-	-	VKORC1	PA133787052	NM_024006.4||||||||	ACTGCTTGAGCCCAGGAGTTAGAGGCAACATAACAACAACTCATCTCTAA[C/T]GAAAAAAAAAAAAAAAGAAAGAAAAAGGCCAGGCACAGTGGCTCACGCCT
522	AM_11065	CES2_c.268+947A>T	rs11568314	snp	Y	16	66970561	A // B	A // T	N/A	+	+	CES2	PA377	NM_003869.4|NP_003860.2||||intron|||	AAAGGTGAAGGCTCTGTGTGCCTGCCAGGCTTCTCCAGGCCCTTATCAGA[A/T]GCTGGGGGAGTGTTTCGGCCTTTGGTCCTCTCACCCGAAACTCTCCTAAG
523	AM_11066	CES2_c.269-965A>G	rs4783745	snp	Y	16	66970975	A // B	G // A	N/A	+	+	CES2	PA377	NM_003869.4|NP_003860.2||||intron|||	TCACTGCAGCCTCCACCTCCTGGGCTTGAGATCCTCCCGCCACAGCCTCC[C/T]GAGTAGCTTGGAGTACAGCTGTCTGCCACCATGCTTGACTTTTTTTTTTT
524	AM_11067	CES2_c.269-683G>A	rs11568311	snp	N	16	66971257	A // B	A // G	N/A	+	+	CES2	PA377	NM_003869.4|NP_003860.2||||intron|||	GGGGCCATCAAAGTCCCCATGGCCCACACTGGAAACTGCTTGTTGACACC[A/G]CAGTACACACAGTGCCCAGCAGTTTACACAAGAATAGATGTGTGCACTTG
525	AM_11068	CES2_c.292C>T(R98W)	rs72547531	snp	N	16	66971963	A // B	C // T	N/A	+	+	CES2	PA377	NM_003869.4|NP_003860.2|C|R|98|coding-nonsynonymous|T|W|98	CCGTGATGTCTGTCTCTCTGCCCACAGGCCAGGACTCAGCCAGTCCCATC[C/T]GGACCACACACACGGGGCAGGTGCTGGGGAGTCTTGTCCATGTGAAGGGC
526	AM_11070	CES2_c.616G>A(V206M)	rs72547532	snp	N	16	66974125	A // B	A // G	N/A	+	+	CES2	PA377	NM_003869.4|NP_003860.2|G|V|206|coding-nonsynonymous|A|M|206	GGGGTTTGGGCTGGGTGGGAGCATCATGGTAGCTGCCTTGATTTCCCCAG[A/G]TGATGGTGTGGATCCACGGTGGTGCGCTTGTTTTTGGCATGGCTTCCTTG
527	AM_11075	CES2_c.1330-2A>G(SpliceDefect)	rs72547533	snp	N	16	66976006	A // B	G // A	N/A	+	+	CES2	PA377	NM_003869.4|NP_003860.2||||intron|||	CCCCAATGTACTCCTCCCTCAGCAGGTCACCAAATGTAGGAGGCAACATC[C/T]ACCCCAGGTGGATCAGGAAGAGGCAGGTTAGACTGGATGCCAGGGGCAGG
528	AM_11076	CES2_c.1613-88C>T(SpliceDefect)	rs3893757	snp	N	16	66977114	A // B	C // T	N/A	+	+	CES2	PA377	NM_003869.4|NP_003860.2||||intron|||	CTGGCTTCTGAGGGCAGTGGAAGAAAAAGCGGAGAAGCAGGACTGGGGAC[C/T]GAGGTCTCGGGGGCCAAGGACGAGCTCCACCTGGGATGCTGAGGTTGGAC
529	AM_11078	NQO1_c.*1119C>T	rs10517	snp	N	16	69743760	A // B	C // T	N/A	-	-	NQO1	PA31744	NM_000903.2|||||mrna-utr|||	CAAATTTTCAGAAGGTTATTTTCTTTATCATTGCTAAACTGATGACTTAC[C/T]ATGGGATGGGGTCCAGTCCCATGACCTTGGGGTACAATTGTAAACCTAGA
530	AM_11080	NQO1_c.*132T>C	rs1063556	snp	N	16	69744747	A // B	C // T	N/A	-	-	NQO1	PA31744	NM_000903.2|||||mrna-utr|||	AAGATTTGTGTTTTTCTTTTTCCACAAGGAATAAATGAGAGGGAATCGAC[C/T]GTATTCGTGCATTTTTGGATCATTTTTAACTGATTCTTATGATTACTATC
531	AM_11081	NQO1_c.*105A>C	rs1050873	snp	N	16	69744774	A // B	C // A	N/A	-	-	NQO1	PA31744	NM_000903.2|||||mrna-utr|||	ATGATCCAAAAATGCACGAATACAGTCGATTCCCTCTCATTTATTCCTTG[G/T]GGAAAAAGAAAAACACAAATCTTAAAAACTAAAGCAAGTCAGGGAAGCCT
532	AM_11082	NQO1_c.*24C>T	rs3191214	snp	N	16	69744855	A // B	C // T	N/A	-	-	NQO1	PA31744	NM_000903.2|||||mrna-utr|||	GACAACCAGATCAAAGCTAGAAAATGAGATTCCTTAGCCTGGATTTCCTT[C/T]TAACATGTTATCAAATCTGGGTATCTTTCCAGGCTTCCCTGACTTGCTTT
533	AM_11084	NQO1_c.559C>T(P187S)	rs1800566	snp	N	16	69745145	A // B	T // C	N/A	-	-	NQO1	PA31744	NM_000903.2|NP_000894.1|C|P|187|coding-nonsynonymous|T|S|187	TTGAATTCGGGCGTCTGCTGGAGTGTGCCCAATGCTATATGTCAGTTGAG[A/G]TTCTAAGACTTGGAAGCCACAGAAATGCAGAATGCCACTCTGAGGATACA
534	AM_11085	NQO1_c.415C>T(R139W)	rs1131341	snp	N	16	69748869	A // B	C // T	N/A	-	-	NQO1	PA31744	NM_000903.2|NP_000894.1|C|R|139|coding-nonsynonymous|T|W|139	TAGGAGAGTTTGCTTACACTTACGCTGCCATGTATGACAAAGGACCCTTC[C/T]GGGTAGGTGGATGGTTCTGAATGCTCTGACAGCCAGCTTCTGGGTGGTCT
535	AM_11088	NQO1_c.72G>A(E24E)	rs689453	snp	N	16	69752373	A // B	G // A	N/A	-	-	NQO1	PA31744	NM_000903.2|NP_000894.1|G|E|24|coding-synonymous|A|E|24	TCCGACTCCACCACCTCCCATCCTTTCTTCTTCAAAGCCGCTGCAGCAGC[C/T]TCCTTCATGGCATAGTTGAAGGACGTCCTCTCTGAGTGAGCCAGTACGAT
536	AM_11089	CHST4_c.-81T>C	rs55676788	snp	N	16	71560153	A // B	C // T	N/A	+	+	CHST4	PA26504	NM_005769.1|||||mrna-utr|||	CTTCTCCCAGCCCACCTCAAGCAGTCTCCCCACCCCTTGAGTCTCAGCAG[C/T]GTTAAAGCTGTTACTTTCACAGCTTCCTGGGAGCGAGTGCTTTCTCAAGC
537	AM_11090	CHST4_c.412T>C(C138R)	rs72547534	snp	N	16	71570992	A // B	C // T	N/A	+	+	CHST4	PA26504	NM_005769.1|NP_005760.1|T|C|138|coding-nonsynonymous|C|R|138	CCAGCCTCTTTCAGTGGGAGAACAGCCGGGCCCTGTGTTCTGCACCTGCC[C/T]GTGACATCATCCCACAAGATGAAATCATCCCCCGGGCTCACTGCAGGCTC
538	AM_11091	CHST4_c.1083C>A(H361Q)	rs3813744	snp	N	16	71571663	A // B	A // C	N/A	+	+	CHST4	PA26504	NM_005769.1|NP_005760.1|C|H|361|coding-nonsynonymous|A|Q|361	CGACTTCAGAAAGCCTGTGGCGATGCCATGAATTTGCTGGGCTACCGCCA[A/C]GTCAGATCTGAACAAGAACAGAGAAACCTGTTGCTGGATCTTCTGTCTAC
539	AM_11116	CHST6_c.196G>C(V66L)	rs72547547	snp	N	16	75513531	A // B	C // G	N/A	-	-	CHST6	PA26506	NM_021615.4|NP_067628.1|G|V|66|coding-nonsynonymous|C|L|66	GGCGCTCGGGCTCGTCCTTCGTGGGCCAACTCTTCAACCAGCACCCCGAC[C/G]TCTTCTACCTAATGGAGCCCGCGTGGCACGTGTGGACCACCCTGTCGCAG
540	AM_11119	CHST6_c.65T>G(L22R)	rs68043642	snp	N	16	75513662	A // B	T // G	N/A	-	-	CHST6	PA26506	NM_021615.4|NP_067628.1|T|L|22|coding-nonsynonymous|G|R|22	CCTCGCCGCCTGCTGGGGACGAGGGCCCTGGCCGGGAAACCAGAAAGAGG[A/C]GGAGGAAGGTCTGCGCCAGGAGGAGCGCGGTCACTGCTGTGCTGGAGACG
541	AM_11120	CHST6_c.52C>T(Q18X)	rs72547550	snp	N	16	75513675	A // B	T // C	N/A	-	-	CHST6	PA26506	NM_021615.4|NP_067628.1|C|Q|18|coding-nonsynonymous|T|X|18	TGGGGACGAGGGCCCTGGCCGGGAAACCAGAAAGAGGAGGAGGAAGGTCT[A/G]CGCCAGGAGGAGCGCGGTCACTGCTGTGCTGGAGACGCGCGGCAGCCACA
542	AM_11121	CHST5_c.1017G>A(E339E)	rs383400	snp	N	16	75563266	A // B	G // A	N/A	-	-	CHST5	PA26505	NM_024533.3|NP_078809.2|G|E|339|coding-synonymous|A|E|339	CGCCAGGCCTGGGAGACGTTGCGCGCATTCCTAGACGAAGTATGGAAGGC[C/T]TCGATTGGCTTGCCGATCCCCGACCCGTGGGTGATGTTGTGGATCCAGGC
543	AM_11126	CHST5_c.510A>G(V170V)	rs2937027	snp	N	16	75563773	A // B	A // G	N/A	-	-	CHST5	PA26505	NM_024533.3|NP_078809.2|A|V|170|coding-synonymous|G|V|170	CCGCCCGCCTGCAGCGCCTTTCCCCGAGGCACCATCAGCAAGCAGGACGT[A/G]TGCAAGACACTGTGCACGCGGCAGCCATTCAGCCTGGCCCGGGAGGCCTG
544	AM_11127	CHST5_c.490A>G(T164A)	rs2937026	snp	N	16	75563793	A // B	A // G	N/A	-	-	CHST5	PA26505	NM_024533.3|NP_078809.2|A|T|164|coding-nonsynonymous|G|A|164	CGAGCCGCGCGCTGTGCTCGCCGCCCGCCTGCAGCGCCTTTCCCCGAGGC[A/G]CCATCAGCAAGCAGGACGTATGCAAGACACTGTGCACGCGGCAGCCATTC
545	AM_11128	CHST5_c.-5A>G	rs3784932	snp	N	16	75564287	A // B	G // A	N/A	-	-	CHST5	PA26505	NM_024533.3|NP_078809.2||||intron|||	TTCGGGTGGAGTGGGCAACTTTAGGGACCCGGGCCCTCATGCCCATCCCA[C/T]GCCCCAATTACTGCCCAGTGCCCTCAGGGATCAGCCCTCAGATTCGGCTA
546	AM_11129	CHST5_c.-386G>C	rs2550915	snp	N	16	75564668	A // B	C // G	N/A	-	-	CHST5	PA26505	NM_024533.3|||||mrna-utr|||	TCATAAGCAAGATCATAGGCTAGGAAGTGGCAGAGCCAGGATTCAACCTC[C/G]GCGAGCCTGGTGGTGCTCTGACATCCACCGAAGCCCCCATCAAGCCCTTT
547	AM_11130	CHST5_c.-1002T>C	rs2738792	snp	N	16	75565284	A // B	C // T	N/A	-	-	CHST5	PA26505	NM_024533.3|||||mrna-utr|||	TACAGCACTTCACTCCCCACCAGTGATGACAACAGTTGCTGTTCTTTGTC[C/T]ACTTTATTTACTTGTTTATCTTTAATGACAAAAGTTTTTTTTTTGTTGTT
548	AM_11131	CHST5_c.-1138C>T	rs2641806	snp	N	16	75565420	A // B	C // T	N/A	-	-	CHST5	PA26505	NM_024533.3|||||mrna-utr|||	AGTCCCCTCAGCTGGCCAGGACAGTACTCTGCTCTCACCTCTCTGCTTCT[C/T]GGGCTCCATCCCAGCTCCCCATCAACTGATCTTCTTGCAAACCCACAGGG
549	AM_11134	SLC7A5_c.*440C>A	rs1060254	snp	N	16	87866136	A // B	A // C	N/A	-	-	SLC7A5	PA35923	NM_003486.5|||||mrna-utr|||	CAGACCCTGGGCAAACAGAGCTACTGAGACTTGGAACCTCATTGCTACCA[A/C]AGACTTGCACTGAAGCCGGACAGCTGCCCAGACACATGGGCTTGTGACAT
550	AM_11135	SLC7A5_c.*438C>G	rs1060253	snp	N	16	87866138	A // B	C // G	N/A	-	-	SLC7A5	PA35923	NM_003486.5|||||mrna-utr|||	CCCAGACCCTGGGCAAACAGAGCTACTGAGACTTGGAACCTCATTGCTAC[C/G]ACAGACTTGCACTGAAGCCGGACAGCTGCCCAGACACATGGGCTTGTGAC
551	AM_11141	SLC7A5_c.690C>G(N230K)	rs1060250	snp	N	16	87874736	A // B	G // C	N/A	-	-	SLC7A5	PA35923	NM_003486.5|NP_003477.4|C|N|230|coding-nonsynonymous|G|K|230	AATGCCAGCACAATGTTCCCCACATCCAGTTTGGTGCCTTCAAATGAGAA[C/G]TTGGGATCTAGATTGGACACATCACCTGGCAGGGCCAAAGAAAGGAATGC
552	AM_11147	SPG7_c.1507A>G(T503A)	rs2292954	snp	N	16	89613123	A // B	A // G	N/A	+	+	SPG7	PA36067	NM_003119.2|NP_003110.1|A|T|503|coding-nonsynonymous|G|A|503	GGGAGATTTTTGAGCAGCACCTGAAGAGCCTGAAGCTGACCCAGTCCAGC[A/G]CCTTTTACTCCCAGCGTCTGGCAGAGCTGACACCAGGATTCAGTGGTACG
553	AM_11149	SPG7_c.1729G>A(G577S)	rs72547552	snp	N	16	89616967	A // B	A // G	N/A	+	+	SPG7	PA36067	NM_003119.2|NP_003110.1|G|G|577|coding-nonsynonymous|A|S|577	GCAAGATCCTGTCCAAGGAAGAACAGAAAGTGGTTGCGTTTCATGAGTCG[A/G]GCCACGCCTTGGTGGGCTGGATGCTGGAGCACACGGAGGCCGTGATGAAG
554	AM_11150	SPG7_c.1770C>T(A590A)	rs60488729	snp	N	16	89617008	A // B	C // T	N/A	+	+	SPG7	PA36067	NM_003119.2|NP_003110.1|C|A|590|coding-synonymous|T|A|590	CATGAGTCGGGCCACGCCTTGGTGGGCTGGATGCTGGAGCACACGGAGGC[C/T]GTGATGAAGGTGGGTCTTGGCAGGTGCCGGCTCCACGGGCCTTGGCCAAA
555	AM_11152	SPG7_c.1868T>G(F623C)	rs17783943	snp	N	16	89619475	A // B	G // T	N/A	+	+	SPG7	PA36067	NM_003119.2|NP_003110.1|T|F|623|coding-nonsynonymous|G|C|623	TGCTCAGATGCTCCCCAGAGACCAGCACCTCTTCACCAAGGAGCAGCTGT[G/T]TGAGCGGATGTGCATGGCCCTGGGAGGACGGGCCTCGGAAGCACTGTCCT
556	AM_11154	SPG7_c.1933T>A(S645T)	rs2099104	snp	N	16	89619540	A // B	A // T	N/A	+	+	SPG7	PA36067	NM_003119.2|NP_003110.1|T|S|645|coding-nonsynonymous|A|T|645	TGGCCCTGGGAGGACGGGCCTCGGAAGCACTGTCCTTCAACGAGGTCACT[A/T]CTGGTGAGGAGCAGCGGCGCGGGCCCTGGAGGTTTCAGAGCGCTTTTCCC
557	AM_11156	SPG7_c.2063G>A(R688Q)	rs12960	snp	N	16	89620328	A // B	G // A	N/A	+	+	SPG7	PA36067	NM_003119.2|NP_003110.1|G|R|688|coding-nonsynonymous|A|Q|688	GCCGACTCACATGGTCCATCATCTGCTGCAGGCCTTGGCTGAAGGGGCGC[C/T]GCCCGATGCCCATGAGGCCCTCCTGCGCCTCAGGGAAGGAGATGGGCCCG
558	AM_11158	SPG7_c.*278T>A	rs458440	snp	N	16	89623779	A // B	A // T	N/A	+	+	SPG7	PA34670	NM_003119.2|||||mrna-utr|||	GGTTATCAGTGCTTCCCGAGTGAGCATGGAACACTTCGAGTTCCCAGGGT[A/T]ATAGACAGTCGTTCCCAGTGTGGCTGAGGCCACCCAGAGGCAGCAGAGCA
559	AM_11161	SPG7_c.*656G>C	rs8058221	snp	N	16	89624157	A // B	C // G	N/A	+	+	SPG7	PA34670	NM_003119.2|||||mrna-utr|||	CCTTGGTTTTTACTGCTCTGAGAATTGTTGAGATACTTTACTAATAAACT[C/G]TGTAGTTGGAAAATCTACATTTGCATTGTCTGGCCAGCTCTAATGCAGAG
560	AM_11168	RPL13_c.334G>A(A112T)	rs9930567	snp	N	16	89628073	A // B	A // G	N/A	+	+	RPL13	PA34670	NM_000977.2|NP_000968.2|G|A|112|coding-nonsynonymous|A|T|112	GCATTTCTGTGGATCCGAGGAGGCGGAACAAGTCCACGGAGTCCCTGCAG[A/G]CCAACGTGCAGCGGCTGAAGGAGTACCGCTCCAAACTCATCCTCTTCCCC
561	AM_11169	RPL13_c.508A>C(T170P)	rs1062450	snp	N	16	89629322	A // B	A // C	N/A	+	+	RPL13	PA34670	NM_000977.2|NP_000968.2|A|T|170|coding-nonsynonymous|C|P|170	AACCTGTCTTTCTCTTCTAGGTCTATAAGAAGGAGAAAGCTCGAGTCATC[A/C]CTGAGGAAGAGAAGAATTTCAAAGCCTTCGCTAGTCTCCGTATGGCCCGT
562	AM_11173	ALDH3A2_c.28C>T(Q10X)	rs72547554	snp	N	17	19552312	A // B	C // T	N/A	+	+	ALDH3A2	PA24698	NM_001031806.1|NP_001026976.1|C|Q|10|coding-nonsynonymous|T|X|10	GCAGTTCTCTGCAGGACCAGGCCATGGAGCTCGAAGTCCGGCGGGTCCGA[C/T]AGGCGTTCCTGTCCGGCCGGTCGCGACCTCTGCGGTTTCGGCTGCAGCAG
563	AM_11176	ALDH3A2_c.233G>A(W78X)	rs72547557	snp	N	17	19554939	A // B	G // A	N/A	+	+	ALDH3A2	PA24698	NM_000382.2|NP_000373.1|G|W|78|coding-nonsynonymous|A|X|78	CCTCATCCAGCATGGTGAGCACGTTCTTCTTAACTGGTTTAGCAGTAACC[C/T]ATTCAGGAAGATTCTCAAGCATAAAATCAATTTCCCCAAGGACAGTAATG
564	AM_11180	ALDH3A2_c.529C>T(R177X)	rs72547561	snp	N	17	19559736	A // B	C // T	N/A	+	+	ALDH3A2	PA24698	NM_000382.2|NP_000373.1|C|R|177|coding-nonsynonymous|T|X|177	ATATTGTTATTAATGGTGGTGTTGAGGAAACCACGGAGCTCCTGAAGCAG[C/T]GATTTGACCACATTTTCTATACGGGAAACACTGCGGTTGGCAAAATTGTC
565	AM_11181	ALDH3A2_c.551C>T(T184M)	rs72547562	snp	N	17	19559758	A // B	C // T	N/A	+	+	ALDH3A2	PA24698	NM_000382.2|NP_000373.1|C|T|184|coding-nonsynonymous|T|M|184	TGAGGAAACCACGGAGCTCCTGAAGCAGCGATTTGACCACATTTTCTATA[C/T]GGGAAACACTGCGGTTGGCAAAATTGTCATGGAAGCTGCTGCCAAGCATC
566	AM_11185	ALDH3A2_c.682C>T(R228C)	rs72547566	snp	N	17	19561059	A // B	C // T	N/A	+	+	ALDH3A2	PA24698	NM_000382.2|NP_000373.1|C|R|228|coding-nonsynonymous|T|C|228	TTGACTGAATTACTGAATTATATAGCTGTTCTGGATGTTTTCCCCTCAGA[C/T]GCATAACCTGGGGAAAATACATGAATTGTGGCCAAACCTGCATTGCACCC
567	AM_11187	ALDH3A2_c.733G>A(D245N)	rs72547568	snp	N	17	19561110	A // B	G // A	N/A	+	+	ALDH3A2	PA24698	NM_000382.2|NP_000373.1|G|D|245|coding-nonsynonymous|A|N|245	AATCTTCCATACAATTTGATTTTGGAGGGATGCTTCACAGAGAATATAGT[C/T]GGGTGCAATGCAGGTTTGGCCACAATTCATGTATTTTCCCCAGGTTATGC
568	AM_11196	ALDH3A2_c.1277T>G(L426X)	rs72547577	snp	N	17	19575103	A // B	G // T	N/A	+	+	ALDH3A2	PA24698	NM_000382.2|NP_000373.1|T|L|426|coding-nonsynonymous|G|X|426	TTATCACGGAAAACATAGTTTTGATACTTTTTCTCATCAGCGTCCCTGTT[G/T]ATTAAAAAGTTTAAAGAGAGAAGGTGCTAACAAACTCAGATATCCTCCCA
569	AM_11200	ALDH3A1_c.1045_1046insG(G349X)	rs72547578	in-del	N	17	19642891	A // B	G // GG	N/A	-	-	ALDH3A1	PA24697	NM_000691.4|NP_000682.3|G|G|349|coding-nonsynonymous|GG|X|349	GTAGAGGGCCAGGGGCTTCTCACGCTGGTTGATGAACTGGATGGCCTCCT[C/CC]CAGGCTGCGCACGCACACGATGGGCAGCACAGGCCCGAAGATCTCCTCTT
570	AM_11202	ALDH3A1_c.914A>T(Y305F)	rs60739355	snp	N	17	19643684	A // B	T // A	N/A	-	-	ALDH3A1	PA24697	NM_000691.4|NP_000682.3|A|Y|305|coding-nonsynonymous|T|F|305	TCAGGGGTCACGCACCTATGTAGCGAGTGGCGGCATCCCCGGTGCCCCCA[A/T]AAGCCACCTTCTGGCCCTCAATCAGGCCCATCACCCTCTGGAAGTGCCGG
571	AM_11203	ALDH3A1_c.741T>A(P247P)	rs2072330	snp	N	17	19644472	A // B	T // A	N/A	-	-	ALDH3A1	PA24697	NM_000691.4|NP_000682.3|T|P|247|coding-synonymous|A|P|247	AGCTTCTCCACAATTTGGTTCTGGATCGAGGGGTCACAGAGGATGTAGTC[A/T]GGGGCCACGCAGGTCTGGCCACTGTTCATGAATTTCCCCCAGGCGATGCG
572	AM_11204	ALDH3A1_c.594G>A(T198T)	rs57633837	snp	N	17	19645412	A // B	G // A	N/A	-	-	ALDH3A1	PA24697	NM_000691.4|NP_000682.3|G|T|198|coding-synonymous|A|T|198	CTCTTCCCTCCCAGCTCCAGCGTGACAGGGGTCAGGTGCTTGGCAGCAGC[C/T]GTCATGATGATCTTCCCCACCCCCGTGCTGCCCGTGTACAGGATATGGTC
573	AM_11205	ALDH3A1_c.400G>T(A134S)	rs887241	snp	N	17	19645938	A // B	G // T	N/A	-	-	ALDH3A1	PA24697	NM_000691.4|NP_000682.3|G|A|134|coding-nonsynonymous|T|S|134	TGGTGAAGTACCCTGGGCATAGGCCTGGCTCGGTGTGCTCTGCAGGGAAC[G/T]CAGTGGTCCTCAAGCCCTCGGAGCTGAGTGAGAACATGGCGAGCCTGCTG
574	AM_11209	PNMT_c.26A>G(N9S)	rs11569781	snp	N	17	37824754	A // B	A // G	N/A	+	+	PNMT	PA274	NM_002686.3|NP_002677.1|A|N|9|coding-nonsynonymous|G|S|9	GCACTGGGCGGACCGCGGCGGCAGCATGAGCGGCGCAGACCGTAGCCCCA[A/G]TGCGGGCGCAGCCCCTGACTCGGCCCCGGGCCAGGCGGCGGTGGCTTCGG
575	AM_11214	PNMT_c.562A>T(S188C)	rs5639	snp	N	17	37826355	A // B	A // T	N/A	+	+	PNMT	PA274	NM_002686.3|NP_002677.1|A|S|188|coding-nonsynonymous|T|C|188	CTCCCCTGCCTGCTGACGCCCTGGTCTCTGCCTTCTGCTTGGAGGCTGTG[A/T]GCCCAGATCTTGCCAGCTTTCAGCGGGCCCTGGACCACATCACCACGCTG
576	AM_11218	PNMT_c.826T>A(W276R)	rs5643	snp	N	17	37826619	A // B	A // T	N/A	+	+	PNMT	PA274	NM_002686.3|NP_002677.1|T|W|276|coding-nonsynonymous|A|R|276	CTGCCCACCTTCAGACAGGCGTAGATGATGTCAAGGGCGTCTTCTTCGCC[A/T]GGGCTCAGAAGGTTGGGCTGTGAGGGCTGTACCTGGTGCCCTGTGGCCCC
577	AM_11219	PGAP3_c.*560C>T	rs2952151	snp	N	17	37828496	A // B	C // T	N/A	+	+	PGAP3	PA274	NM_033419.3|||||mrna-utr|||	GGCCCTGAAAGGGAGTATGGTGAGGCCTCCTGGGAACCTGGCTAGGGCAA[C/T]GGTCAGGGTGAAACTCCTTCCCAATCCCAGCAGCTTGGTCCCTCAAGATC
578	AM_11225	ABCC3_c.1583C>G(A528G)	rs1003355	snp	N	17	48745066	A // B	C // G	N/A	+	+	ABCC3	PA376	NM_003786.3|NP_003777.2|C|A|528|coding-nonsynonymous|G|G|528	GAAGCAGGTGGAGGGCATCAGGCAGGGTGAGCTCCAGCTGCTGCGCACGG[C/G]GGCCTACCTCCACACCACAACCACCTTCACCTGGATGTGCAGCCCCTTCC
579	AM_11231	ABCC3_c.3039C>T(G1013G)	rs4148416	snp	N	17	48753423	A // B	C // T	N/A	+	+	ABCC3	PA376	NM_003786.3|NP_003777.2|C|G|1013|coding-synonymous|T|G|1013	AATGATGCCATGGCAGACAGTAGACAGAACAACACTTCCCTGAGGCTGGG[C/T]GTCTATGCTGCTTTAGGAATTCTGCAAGGTGAGCTTGTGGGGGTGTCCAG
580	AM_11235	ABCC3_c.3890G>A(R1297H)	rs11568591	snp	N	17	48761053	A // B	A // G	N/A	+	+	ABCC3	PA376	NM_003786.3|NP_003777.2|G|R|1297|coding-nonsynonymous|A|H|1297	CGAAGGTTGGCCCCCACGTGGGGAGGTGGAGTTCCGGAATTATTCTGTGC[A/G]CTACCGGCCGGGCCTAGACCTGGTGCTGAGAGACCTGAGTCTGCATGTGC
581	AM_11236	ABCC3_c.3942C>T(H1314H)	rs2277624	snp	N	17	48761105	A // B	T // C	N/A	+	+	ABCC3	PA376	NM_003786.3|NP_003777.2|C|H|1314|coding-synonymous|T|H|1314	CATGAACACACACGCAGGCCCGCCTACCCCACGCGTACCTTCTCGCCACC[A/G]TGCACATGCAGACTCAGGTCTCTCAGCACCAGGTCTAGGCCCGGCCGGTA
582	AM_11239	ABCC3_c.4084C>G(L1362V)	rs1051625	snp	N	17	48761439	A // B	C // G	N/A	+	+	ABCC3	PA376	NM_003786.3|NP_003777.2|C|L|1362|coding-nonsynonymous|G|V|1362	GTGAAATCCGCATTGATGGCCTCAATGTGGCAGACATCGGCCTCCATGAC[C/G]TGCGCTCTCAGCTGACCATCATCCCGCAGGTAGGAGCCTGGCATGGGCTG
583	AM_11243	ABCC3_c.4509A>G(E1503E)	rs1051640	snp	N	17	48768486	A // B	A // G	N/A	+	+	ABCC3	PA376	NM_003786.3|NP_003777.2|A|E|1503|coding-synonymous|G|E|1503	CTCTCTTTTTTGACTAGGGTCCTGGTCCTGGACAAAGGAGTAGTAGCTGA[A/G]TTTGATTCTCCAGCCAACCTCATTGCAGCTAGAGGCATCTTCTACGGGAT
584	AM_11245	TYMS_c.298G>C(E100Q)	rs59755869	snp	N	18	662164	A // B	C // G	N/A	+	+	TYMS	PA359	NM_001071.2|NP_001062.1|G|E|100|coding-nonsynonymous|C|Q|100	GATGCCTGCTCTGCTCTCCCCATCTCTTCCAGGGATCCACAAATGCTAAA[C/G]AGCTGTCTTCCAAGGGAGTGAAAATCTGGGATGCCAATGGATCCCGAGAC
585	AM_11246	TYMS_c.349T>C(F117L)	rs11540152	snp	N	18	662215	A // B	C // T	N/A	+	+	TYMS	PA359	NM_001071.2|NP_001062.1|T|F|117|coding-nonsynonymous|C|L|117	AGCTGTCTTCCAAGGGAGTGAAAATCTGGGATGCCAATGGATCCCGAGAC[C/T]TTTTGGACAGCCTGGGATTCTCCACCAGAGAAGAAGGGGACTTGGGCCCA
586	AM_11247	TYMS_c.381A>G(E127E)	rs3786362	snp	N	18	662247	A // B	A // G	N/A	+	+	TYMS	PA359	NM_001071.2|NP_001062.1|A|E|127|coding-synonymous|G|E|127	GCCAATGGATCCCGAGACTTTTTGGACAGCCTGGGATTCTCCACCAGAGA[A/G]GAAGGGGACTTGGGCCCAGTTTATGGCTTCCAGTGGAGGCATTTTGGGGC
587	AM_11248	TYMS_c.470G>T(G157V)	rs596909	snp	N	18	669087	A // B	G // T	N/A	+	+	TYMS	PA359	NM_001071.2|NP_001062.1|G|G|157|coding-nonsynonymous|T|V|157	TATGTACCTGTCCTCTCTTTTTGACAATTCTACAGATTATTCAGGACAGG[G/T]AGTTGACCAACTGCAAAGAGTGATTGACACCATCAAAACCAACCCTGACG
588	AM_11249	TYMS_c.500C>T(T167I)	rs11540153	snp	N	18	669117	A // B	T // C	N/A	+	+	TYMS	PA359	NM_001071.2|NP_001062.1|C|T|167|coding-nonsynonymous|T|I|167	GATTCCAAGCGCACATGATGATTCTTCTGTCGTCAGGGTTGGTTTTGATG[A/G]TGTCAATCACTCTTTGCAGTTGGTCAACTCCCTGTCCTGAATAATCTGTA
589	AM_11250	RALBP1_c.445A>G(K149E)	rs11559053	snp	N	18	9517043	A // B	A // G	N/A	+	+	RALBP1	PA34199	NM_006788.3|NP_006779.1|A|K|149|coding-nonsynonymous|G|E|149	AAGAAGAAAAGCATAAAGAAGAAAAGCACAAAGAAGAAAAACATAAAGAG[A/G]AGAAGTCAAAAGACTTGACAGCAGCTGATGTTGTTAAACAGTGGAAGGAA
590	AM_11251	RALBP1_c.623G>A(R208Q)	rs28552921	snp	N	18	9517221	A // B	G // A	N/A	+	+	RALBP1	PA34199	NM_006788.3|NP_006779.1|G|R|208|coding-nonsynonymous|A|Q|208	TGCCATACTTCTCTACGTAATCTATACATTCACGGAAAACGGCTGGCAGC[C/T]GAATGCCATCATACATCATGGTCCTCTCTACTGCATCAGCCAAAGGAATT
591	AM_11252	RALBP1_c.1850C>T(A617V)	rs35867116	snp	N	18	9535817	A // B	T // C	N/A	+	+	RALBP1	PA34199	NM_006788.3|NP_006779.1|C|A|617|coding-nonsynonymous|T|V|617	GCTCTTTAGCTGCTTTTGGCTCAAGGACGCCGTCTCTGGGCGGCTGGACG[A/G]CACCCCCGCGCCACTCAGGCTCCTCGTCCTCCTGCGCCTGCTGCTCGGCC
592	AM_11253	RALBP1_c.*314T>C	rs10898	snp	N	18	9536249	A // B	T // C	N/A	+	+	RALBP1	PA34199	NM_006788.3|||||mrna-utr|||	AATGAGAAAGAGATCCTGATTCTGCTGTGATAAAAAAGCAAAGAAAGACG[A/G]TTTTTGGTTTAAAAAGAAGCCACTCAAGGGTTAAAATAGTTATTTTAAGT
593	AM_11254	RALBP1_c.*756G>A	rs3322	snp	N	18	9536691	A // B	A // G	N/A	+	+	RALBP1	PA34199	NM_006788.3|||||mrna-utr|||	GTTCCTCACTGCGGGGACCAGCAAAGGCCTTCTCACTGGGTTGGTCAAAG[A/G]TAGTCACCTTGGCCTGGTGCATCCACAGAGGATGTTGTTCAAACCAGAAA
594	AM_11255	RALBP1_c.*1900G>C	rs12680	snp	N	18	9537835	A // B	G // C	N/A	+	+	RALBP1	PA34199	NM_006788.3|||||mrna-utr|||	CTGCTCAGACAGCAGACCCAGCCCAGTCCACTGGGTTTTGCAAACACAGG[C/G]TCCCTCTGCAGCAGCATGGGCTTGTGGAAGGGAGGCATGCCGCCGCCAGC
595	AM_11257	CHST9_c.638A>C(K213T)	rs418546	snp	N	18	24496917	A // B	C // A	N/A	-	-	CHST9	PA134888782	NM_031422.3|NP_113610.2|A|K|213|coding-nonsynonymous|C|T|213	TTCTTTTCCAATTGGAACAGCCAGCCTTAGGTACCTCACAATATAAGATT[G/T]TGTGTTTATCTTCTACATAGATTCTGGATACTGTATGAAAAAGATGTGAC
596	AM_11258	CHST9_c.365G>A(S122N)	rs17694469	snp	N	18	24497190	A // B	A // G	N/A	-	-	CHST9	PA134888782	NM_031422.3|NP_113610.2|G|S|122|coding-nonsynonymous|A|N|122	TAGGCTCTTAACAAAGACCAGTCATTCACAAGGAGGGGATCAAGCTTTAA[A/G]TAAGTCCACAGGGTCACCAACAGAGAAGTTGATTGAAAAACGTCAAGGAG
597	AM_11259	CHST9_c.331A>C(T111P)	rs417808	snp	N	18	24497224	A // B	C // A	N/A	-	-	CHST9	PA134888782	NM_031422.3|NP_113610.2|A|T|111|coding-nonsynonymous|C|P|111	TGACCCTGTGGACTTACTTAAAGCTTGATCCCCTCCTTGTGAATGACTGG[G/T]CTTTGTTAAGAGCCTAGTAGATCTCTCAGAATTGAGTAGAAGATTTTCCT
598	AM_11260	CHST9_c.147A>C(Q49H)	rs1155514	snp	N	18	24628442	A // B	C // A	N/A	-	-	CHST9	PA134888782	NM_031422.3|NP_113610.2|A|Q|49|coding-nonsynonymous|C|H|49	AGGAAATAAAGCTGGAGCCCATTGGACAAAATCTTACCTGAAGTTACTTT[G/T]TGTTCTCTTCTCTTCTCCACTCTCCCTGAAATGAGAAGTGGAAGATAAGT
599	AM_11262	CHST9_c.-66C>T	rs28693844	snp	N	18	24722839	A // B	T // C	N/A	-	-	CHST9	PA134888782	NM_031422.3|||||mrna-utr|||	AATCTGAAGACCACATGATTTGTTTTCCCGTAAAACTTCAGTCTTTTCTT[A/G]TTCTCTAAGAGCCCAATTCCATAAAGTAACCTAGAATTTTAAAAAGAAAT
600	AM_11263	CYP4F8_-281G>A	rs4808326	snp	N	19	15726147	A // B	A // G	N/A	+	+	CYP4F8	PA405	NM_007253.3|NP_009184.1||||locus-region|||	AGGCTGGGGGTGGCAGGGCTGGATAGGGAGGGGCACTGCCCAAGACTGGG[A/G]TGGCTCCAGGGAGCTGGCCCTGGTGATGGGTGCTTGCAGGTAACCAGAGG
601	AM_11264	CYP4F8_60G>T(L20L)	rs4646523	snp	N	19	15726487	A // B	G // T	N/A	+	+	CYP4F8	PA405	NM_007253.3|NP_009184.1|G|L|20|coding-synonymous|T|L|20	CTGAGCCTGTCTTGGCTGGGCCTCAGGCCGGTGGCAGCATCCCCGTGGCT[G/T]CTCCTGCTGGTGGTCGGGGCCTCCTGGCTCCTGGCCCGCATCCTGGCCTG
602	AM_11265	CYP4F8_2506C>T(V107V)	rs59092606	snp	N	19	15728933	A // B	C // T	N/A	+	+	CYP4F8	PA405	NM_007253.3|NP_009184.1|C|V|107|coding-synonymous|T|V|107	TGGTTGGGCCCCATCACTCCCATCATCAACTTGTGCCACCCTGACATCGT[C/T]CGATCTGTCATCAATACCTCAGGTACTCCTGCAGAGCTTGTGGTGGTGGG
603	AM_11266	CYP4F8_3904A>T(Y125F)	rs2072600	snp	N	19	15730331	A // B	A // T	N/A	+	+	CYP4F8	PA405	NM_007253.3|NP_009184.1|A|Y|125|coding-nonsynonymous|T|F|125	ATGGTCCTCATTCATGTCAGATGCCATTACAGACAAGGACATAGTCTTCT[A/T]CAAGACCCTGAAGCCCTGGCTGGGTAAGTAACTGTAGGTGGACGGGACGG
604	AM_11267	CYP4F8_12803C>T(R412X)	rs4646532	snp	N	19	15739230	A // B	C // T	N/A	+	+	CYP4F8	PA405	NM_007253.3|NP_009184.1|C|R|412|coding-nonsynonymous|T|X|412	TCCCTACATTCGCCCGCGGCTGCACCCAGGACGTGGTGCTCCCAGACAGC[C/T]GAGTCATCCCCAAAGGTGCCCTCCATGGCAGGGGAGGAGGGTCCTGGGCA
605	AM_11268	CYP4F8_13170C>A(P447P)	rs2056822	snp	N	19	15739597	A // B	A // C	N/A	+	+	CYP4F8	PA405	NM_007253.3|NP_009184.1|C|P|447|coding-synonymous|A|P|447	AGCCTTAACTTGCCTCCACCCCAGGTCTATGACCCCTTCCGCTTCGACCC[A/C]GAAAACGCCCAGAAGAGGTCACCTATGGCTTTTATTCCTTTCTCGGCGGG
606	AM_11269	CYP4F8_13793T>C	rs4239614	snp	N	19	15740220	A // B	T // C	N/A	+	+	CYP4F8	PA405	NM_007253.3|||||mrna-utr|||	CTGAGGCACAGGGGCCAACACAGATTTATTACCGGAAATCTGAAAAGGTA[A/G]TTGGTGCAAAGGTAGGTGATGCAAAGGTAGGTGGGTGGGTCACTGCAGGC
607	AM_11270	CYP4F3_140G>A(R47H)	rs61734305	snp	N	19	15752365	A // B	A // G	N/A	+	+	CYP4F3	PA234	NM_000896.2|NP_000887.2|G|R|47|coding-nonsynonymous|A|H|47	CCTGGCCCGCATCCTGGCCTGGACCTATACCTTCTATGACAACTGCTGCC[A/G]CCTCCGGTGTTTCCCGCAACCCCCGAAACGGAATTGGTTCTTGGGTCACC
608	AM_11271	CYP4F3_4315G>A(S70S)	rs61734303	snp	N	19	15756540	A // B	G // A	N/A	+	+	CYP4F3	PA234	NM_000896.2|NP_000887.2|G|S|70|coding-synonymous|A|S|70	ATATCACCGAAGGTGCATGCCAGGCTTTGTGTGTATAGGAGACCTTCCTC[C/T]GAGCTGTGAATCTGGAGAGAAAGACACAGGACCCAATTCATGCTCTCCTA
609	AM_11272	CYP4F3_4393C>G(H96Q)	rs34923393	snp	N	19	15756618	A // B	G // C	N/A	+	+	CYP4F3	PA234	NM_000896.2|NP_000887.2|C|H|96|coding-nonsynonymous|G|Q|96	GCAAAGAGCACAGGCTTGATGTAGGTGGGGTGGAAGATGCGGACGATTGC[C/G]TGCCAGGGCCCCACCCACCAGCAGCACATATCACCGAAGGTGCATGCCAG
610	AM_11274	CYP4F3_5872A>G(Y163C)	rs61734315	snp	N	19	15758097	A // B	A // G	N/A	+	+	CYP4F3	PA234	NM_000896.2|NP_000887.2|A|Y|163|coding-nonsynonymous|G|C|163	CCACCGTCGGATGCTGACGCCTGCCTTCCATTTCAACATCCTGAAGCCCT[A/G]TATGAAGATTTTCAATGAGAGTGTGAACATCATGCATGTGAGTTATTTGA
611	AM_11275	CYP4F3_7828G>A(L203L)	rs1053037	snp	N	19	15760053	A // B	A // G	N/A	+	+	CYP4F3	PA234	NM_000896.2|NP_000887.2|G|L|203|coding-synonymous|A|L|203	GCCCGTCTGGACATGTTTGAGCACATCAGCCTCATGACCTTGGACAGTCT[A/G]CAGAAATGTGTCTTCAGCTTTGACAGCCATTGCCAGGAGTAAGTTCTTGC
612	AM_11279	CYP4F3_11466G>A(P348P)	rs1805041	snp	N	19	15763691	A // B	G // A	N/A	+	+	CYP4F3	PA234	NM_000896.2|NP_000887.2|G|P|348|coding-synonymous|A|P|348	CGGTCCTTCAGAAGCTCTTGCACCTCCTGCCGACAGCGCTCCTGGTATTC[C/T]GGGTGCTTTGCAAGGTGGTACAGGACCCAGGAGAGACCACTGGCTGTGGT
613	AM_11280	CYP4F3_11496A>G(V358V)	rs4646904	snp	N	19	15763721	A // B	A // G	N/A	+	+	CYP4F3	PA234	NM_000896.2|NP_000887.2|A|V|358|coding-synonymous|G|V|358	TACCACCTTGCAAAGCACCCGGAATACCAGGAGCGCTGTCGGCAGGAGGT[A/G]CAAGAGCTTCTGAAGGACCGTGAGCCTAAAGAGATTGAATGGTGAGTGCA
614	AM_11285	CYP4F12_4759G>A(D76N)	rs609636	snp	N	19	15789098	A // B	A // G	N/A	+	+	CYP4F12	PA38717	NM_023944.2|NP_076433.2|G|D|76|coding-nonsynonymous|A|N|76	GACAGCCCTTGACTTGCTTTCAGATCACTCCTACAGAGGAGGGCTTGAAG[A/G]ACTCGACCCAGATGTCGGCCACCTATTCCCAGGGCTTTACGATATGGCTG
615	AM_11286	CYP4F12_4801G>A(V90I)	rs609290	snp	N	19	15789140	A // B	A // G	N/A	+	+	CYP4F12	PA38717	NM_023944.2|NP_076433.2|G|V|90|coding-nonsynonymous|A|I|90	GCTTGAAGAACTCGACCCAGATGTCGGCCACCTATTCCCAGGGCTTTACG[A/G]TATGGCTGGGTCCCATCATCCCCTTCATCGTTTTATGCCACCCTGACACC
616	AM_11289	CYP4F12_10124G>C(V270L)	rs57578760	snp	N	19	15794463	A // B	C // G	N/A	+	+	CYP4F12	PA38717	NM_023944.2|NP_076433.2|G|V|270|coding-nonsynonymous|C|L|270	GGCGGCGCTTCCACAGGGCCTGCCGCCTGGTGCATGACTTCACAGACGCT[C/G]TCATCCGGGAGCGGCGTCGCACCCTCCCCACTCAGGGTATTGATGATTTT
617	AM_11290	CYP4F12_22507A>G(I406V)	rs59302543	snp	N	19	15806846	A // B	A // G	N/A	+	+	CYP4F12	PA38717	NM_023944.2|NP_076433.2|A|I|406|coding-nonsynonymous|G|V|406	TGAGGTTACATCCCCCAGCTCCCTTCATCTCCCGATGCTGCACCCAGGAC[A/G]TTGTTCTCCCAGATGGCCGAGTCATCCCCAAAGGTGCCCACAGCCTCAGG
618	AM_11291	CYP4F12_22966T>C(P460P)	rs688755	snp	N	19	15807305	A // B	C // T	N/A	+	+	CYP4F12	PA38717	NM_023944.2|NP_076433.2|T|P|460|coding-synonymous|C|P|460	CGCTTTGACCCAGAGAACAGCAAGGGGAGGTCACCTCTGGCTTTTATTCC[C/T]TTCTCCGCAGGGCCCAGGTAAGAGCGCCCTGTGTCTGAGGCAGGGATGGG
619	AM_11296	CYP4F12_23491T>C(L504L)	rs593421	snp	N	19	15807830	A // B	T // C	N/A	+	+	CYP4F12	PA38717	NM_023944.2|NP_076433.2|T|L|504|coding-synonymous|C|L|504	ATTCAGGGGCTCCACCCGCAGCCAAAGCCCGCCCTCGGCGCGCATGATCA[A/G]TTCCAGCTTCCTGCGGGGCTCAGTGTGGTCTGGCAGGAACCGGAAGTGCA
620	AM_11299	CYP4F2*3_18000G>A(V433M)	rs2108622	snp	N	19	15990431	A // B	G // A	N/A	-	-	CYP4F2	PA27121	NM_001082.3|NP_001073.3|G|V|433|coding-nonsynonymous|A|M|433	GAATGGACAAAAACAGAGAGAGGGGCCCCGCACCTCAGGGTCCGGCCACA[C/T]AGCTGGGTTGTGATGGGTTCCGAAAACACTGATGAGGCAGATAATGCCTG
621	AM_11300	CYP4F2_11602C>T(H343H)	rs2074900	snp	N	19	15996820	A // B	T // C	N/A	-	-	CYP4F2	PA27121	NM_001082.3|NP_001073.3|C|H|343|coding-synonymous|T|H|343	TCTTGCACCTCCTGCCGGCAGCGCTCCTGGTATTCTGGGTGCTTTGCAAG[A/G]TGGTACAGGACCCAGGAGAGACCACTGGCCGTGGTGTCATGGCCTGGGGG
622	AM_11301	CYP4F2_8103C>T(L278F)	rs4605294	snp	N	19	16000319	A // B	T // C	N/A	-	-	CYP4F2	PA27121	NM_001082.3|NP_001073.3|C|L|278|coding-nonsynonymous|T|F|278	CTTGGATTTGGCCTTGGCTTGGAGGAAGTCATCAACACCCTGGCTAGGGA[A/G]AGTGCGGCGCCGCTCCTGGATGACGGCATCTGTGAAGTCGTGCACCAGGC
623	AM_11302	CYP4F2_7207G>T(G185V)	rs3093153	snp	N	19	16001215	A // B	T // G	N/A	-	-	CYP4F2	PA27121	NM_001082.3|NP_001073.3|G|G|185|coding-nonsynonymous|T|V|185	TGTCCAAGGTCATGAGGCTGATGTGCTCAAACATATCCAAACAGGCACTA[A/C]CCTCTGAGGCCAGGAGCTGCCACTTGGCCTAGCCAGAGAAGGGGACAGAG
624	AM_11303	CYP4F2_5034C>G(A116A)	rs3093136	snp	N	19	16003388	A // B	C // G	N/A	-	-	CYP4F2	PA27121	NM_001082.3|NP_001073.3|C|A|116|coding-synonymous|G|A|116	TCTTTCACCTGCCTCCATGGCCCCTGATTGTCCTCATTTATGTCAGCTGC[C/G]ATTGCACCAAAGGACAAGTTCTTCTACAGCTTCCTGGAGCCCTGGCTGGG
625	AM_11304	CYP4F2_2099C>T(N112N)	rs8110714	snp	N	19	16006323	A // B	T // C	N/A	-	-	CYP4F2	PA27121	NM_001082.3|NP_001073.3|C|N|112|coding-synonymous|T|N|112	CAGGCCTCAAATGCACTGCCCCACCAGCTGTTCCAGATGGTACCTGAGGC[A/G]TTGATGACAGACCGGATGATGTCGGGGTGGCACAAACTGAGGAGGGGGGA
626	AM_11305	CYP4F2_2042A>C(G93G)	rs8100960	snp	N	19	16006380	A // B	C // A	N/A	-	-	CYP4F2	PA27121	NM_001082.3|NP_001073.3|A|G|93|coding-synonymous|C|G|93	ACAGACCGGATGATGTCGGGGTGGCACAAACTGAGGAGGGGGGAGATGGG[G/T]CCCATCCAGACCTTAAAGCCCTGGGGGTAGGTGGCCACCAGCTGAGTCAG
627	AM_11307	CYP4F2_165A>G(P55P)	rs3093106	snp	N	19	16008257	A // B	G // A	N/A	-	-	CYP4F2	PA27121	NM_001082.3|NP_001073.3|A|P|55|coding-synonymous|G|P|55	CCTGCTGCCACACTCACCATGCCCTGGTGTCCCCAAAACCAGTTCCGTCT[C/T]GGGGGTTGTGGGAAACACCGAAGGCGGCGGCAGTTGTCATAGAAGGCGTA
628	AM_11308	CYP4F2_38C>G(P13R)	rs2906890	snp	N	19	16008384	A // B	C // G	N/A	-	-	CYP4F2	PA27121	NM_001082.3|NP_001073.3|C|P|13|coding-nonsynonymous|G|R|13	TCTGCCCTGCAGGATGTCCCAGCTGAGCCTGTCCTGGCTGGGCCTCTGGC[C/G]AGTGGCAGCATCCCCTTGGCTGCTCCTCCTGCTGGTCGGGGCCTCCTGGC
629	AM_11309	CYP4F2_36G>C(W12C)	rs2906891	snp	N	19	16008386	A // B	G // C	N/A	-	-	CYP4F2	PA27121	NM_001082.3|NP_001073.3|G|W|12|coding-nonsynonymous|C|C|12	CAGGAGGCCCCGACCAGCAGGAGGAGCAGCCAAGGGGATGCTGCCACTGG[C/G]CAGAGGCCCAGCCAGGACAGGCTCAGCTGGGACATCCTGCAGGGCAGACG
630	AM_11310	CYP4F2*2_34T>G(W12G)	rs3093105	snp	N	19	16008388	A // B	T // G	N/A	-	-	CYP4F2	PA27121	NM_001082.3|NP_001073.3|T|W|12|coding-nonsynonymous|G|G|12	GGAGGCCCCGACCAGCAGGAGGAGCAGCCAAGGGGATGCTGCCACTGGCC[A/C]GAGGCCCAGCCAGGACAGGCTCAGCTGGGACATCCTGCAGGGCAGACGGG
631	AM_11313	CYP4F11_20043G>A(D446N)	rs1060463	snp	N	19	16025176	A // B	G // A	N/A	-	-	CYP4F11	PA27120	NM_021187.3|NP_067010.3|G|D|446|coding-nonsynonymous|A|N|446	CGAGAAGGGAATAAAAGCCAGAGGTGACCTCTCCTTGATGTTCTCTTGGT[C/T]GAAACGGAAGGGGTCGTAGACCTGCAGGTGAGACCAAGAAGGCTTGCTGG
632	AM_11314	CYP4F11_10505C>T(R276C)	rs8104361	snp	N	19	16034714	A // B	C // T	N/A	-	-	CYP4F11	PA27120	NM_021187.3|NP_067010.3|C|R|276|coding-nonsynonymous|T|C|276	CCTGCCACCTGGTGCACGACTTCACAGATGCCGTCATCCAGGAGCGGCGC[C/T]GCACCCTCCCCACTCAGGGTATTGATGATTTCCTCAAGAACAAGGCAAAG
633	AM_11317	CYP4F11_4927T>C(I106I)	rs3765070	snp	N	19	16040292	A // B	C // T	N/A	-	-	CYP4F11	PA27120	NM_021187.3|NP_067010.3|T|I|106|coding-synonymous|C|I|106	TTGTGGCTGGGTCCTACCTTCCCCCTCCTCATTTTATGCCACCCTGACAT[C/T]ATCCGGCCTATCACCAGTGCCTCAGGTACCCGTGCAGAGCTTGTGGTAGT
634	AM_11318	CYP4F11_78G>A(G26G)	rs2305801	snp	N	19	16045141	A // B	G // A	N/A	-	-	CYP4F11	PA27120	NM_021187.3|NP_067010.3|G|G|26|coding-synonymous|A|G|26	TCATAGAAGGTGTAGGTCCAGGCCAGGACGCGGGCCAGGAGCCAGGAGCC[C/T]CCAACCAGCAGCAGAAGCAGCCACGGGGATGCTGCCACGGGCCCGAGGCC
635	AM_11320	CHST8_c.-589C>T	rs3810364	snp	N	19	34175603	A // B	C // T	N/A	+	+	CHST8	PA26508	NM_022467.3|||||mrna-utr|||	CCGCGCGCAGGGAAGAACTAGTCTGACAAAACAGAAGGAGGTGGTGCTCT[C/T]GGGGGACTGGGCTGTAGGCTCCCACCGATCGATCGGCGACGAGCAGATGA
636	AM_11321	CHST8_c.-134T>C	rs72547580	snp	N	19	34176058	A // B	C // T	N/A	+	+	CHST8	PA26508	NM_022467.3|||||mrna-utr|||	CAGCTGAGGGGAGCGTCCAGGCCCAGAAGCAGCTGCAGCCAAGCGTGTCC[C/T]TGGAGCCGTCCATGCGTCTGTCCGCCTGCTGCCGGTCGCCACTGGAGGTG
637	AM_11325	CHST8_c.*386G>A	rs1064349	snp	N	19	34264354	A // B	G // A	N/A	+	+	CHST8	PA26508	NM_022467.3|||||mrna-utr|||	ACCATGTGCTTTATTTGGAACCTTAATCCAAGGGAACCTCCCCCCTGGCT[C/T]GTAGAAAAGCTGCAAACCACGTGGTTTGGTCCAAGGCAATGGCTAAGGGA
638	AM_11327	CYP2A6*8_6600G>T(R485L)	rs28399468	snp	Y	19	41349732	A // B	G // T	N/A	-	-	CYP2A6	PA121	NM_000762.5|NP_000753.3|G|R|485|coding-nonsynonymous|T|L|485	TAAGGACATTGACGTGTCCCCCAAACACGTGGGCTTTGCCACGATCCCAC[G/T]AAACTACACCATGAGCTTCCTGCCCCGCTGAGCGAGGGCTGTGCCGGTGC
639	AM_11330	CYP2A6*7_6558T>C(I471T)	rs5031016	snp	Y	19	41349774	A // B	T // C	N/A	-	-	CYP2A6	PA121	NM_000762.5|NP_000753.3|T|I|471|coding-nonsynonymous|C|T|471	TGTAGTTTCGTGGGATCGTGGCAAAGCCCACGTGTTTGGGGGACACGTCA[A/G]TGTCCTTAGGTGACTGGGAGGACTTGAGGCGGAAGTTCTGCATGACGGTG
640	AM_11332	CYP2A6*28_5750G>C(E419D)	rs8192730	snp	N	19	41350582	A // B	C // G	N/A	-	-	CYP2A6	PA121	NM_000762.5|NP_000753.3|G|E|419|coding-nonsynonymous|C|D|419	AGTTTCTTCTCCAACCCCCAGGACTTCAATCCCCAGCACTTCCTGAATGA[C/G]AAGGGGCAGTTTAAGAAGAGTGATGCTTTTGTGCCCTTTTCCATCGGTAA
641	AM_11334	CYP2A6_5336G>A	rs8192729	snp	N	19	41350996	A // B	A // G	N/A	-	-	CYP2A6	PA121	NM_000762.5|NP_000753.3||||intron|||	TCCACTTAGACACTCCTGAGTCCTGCATCTCTCCAGACTCTTTGTGTCAG[A/G]AGAATCAAACACATGTTCCCAAACTTCCTATCTTAAGAAACAGAAGCCCC
642	AM_11336	CYP2A6_5132delA(K387X)	rs72547582	in-del	Y	19	41351200	A // B	- // A	N/A	-	-	CYP2A6	PA121	NM_000762.5|NP_000753.3|A|K|387|coding-nonsynonymous|-|X|387	GAGAGGGGCTGGAAGTCCCCGTAGTCTGGGGGGTGGGGGCGGATAGCACC[-/T]TAGGGAGGAAGAAATCCCGAAACTTGGTGTCCTTTTTGACTCTGCGGGCC
643	AM_11337	CYP2A6*17_5065G>A(V365M)	rs28399454	snp	Y	19	41351267	A // B	G // A	N/A	-	-	CYP2A6	PA121	NM_000762.5|NP_000753.3|G|V|365|coding-nonsynonymous|A|M|365	CCGAAACTTGGTGTCCTTTTTGACTCTGCGGGCCAAACTCATGGGGATCA[C/T]GTCTCCAAATCTTTGGATCTCGTGGATCACTGCCTCCATGTAGGGCATCT
644	AM_11341	CYP2A6_4365A>G(K289K)	rs2644905	snp	N	19	41351967	A // B	G // A	N/A	-	-	CYP2A6	PA121	NM_000762.5|NP_000753.3|A|K|289|coding-synonymous|G|K|289	ACGGTCTCGGTGCCCCCAATGAAGAGGTTCAACGTGGTCATCACCAGGTT[C/T]TTCAAGTAGAACTCCGTGTTGGGGTTCTTCTCCTCCTGCAGGGAGAGGGG
645	AM_11342	CYP2A6_3570C>G	rs4079369	snp	Y	19	41352762	A // B	G // C	N/A	-	-	CYP2A6	PA121	NM_000762.5|NP_000753.3||||intron|||	GCCCCACTCCCAGACTGATTTCCCTCTGCCTGGCTTTGCATCTCCCCGCA[C/G]TGGCTGCTGGGGTGTACCTCCTGCATGCGGATGAGAAAGGAGTCAATGAA
646	AM_11343	CYP2A6_3420A>G(P233P)	rs3891219	snp	Y	19	41352912	A // B	A // G	N/A	-	-	CYP2A6	PA121	NM_000762.5|NP_000753.3|A|P|233|coding-synonymous|G|P|233	CCCCAGCTCTATGAGATGTTCTCTTCGGTGATGAAACACCTGCCAGGACC[A/G]CAGCAACAGGCCTTTCAGTTGCTGCAAGGGCTGGAGGACTTCATAGCCAA
647	AM_11344	CYP2A6*11_3391T>C(S224P)	rs111033610	snp	Y	19	41352941	A // B	C // T	N/A	-	-	CYP2A6	PA121	NM_000762.5|NP_000753.3|T|S|224|coding-nonsynonymous|C|P|224	GTCCTTCCCTTCCCATCCTCTCTCTGCAACCCCAGCTCTATGAGATGTTC[C/T]CTTCGGTGATGAAACACCTGCCAGGACCACAGCAACAGGCCTTTCAGTTG
648	AM_11346	CYP2A6*20_2141delAA(K196X)	rs28399444	in-del	Y	19	41354190	A // B	- // AA	N/A	-	-	CYP2A6	PA121	NM_000762.5|NP_000753.3|AA|K|196|coding-nonsynonymous|-|X|196	CAATGTCATCAGCTCCATTGTCTTTGGGGACCGCTTTGACTATAAGGACA[-/AA]GAGTTCCTGTCACTGTTGCGCATGATGCTAGGAATCTTCCAGTTCACGTC
649	AM_11349	CYP2A6_1874G>T	rs28399442	snp	N	19	41354458	A // B	G // T	N/A	-	-	CYP2A6	PA121	NM_000762.5|NP_000753.3||||intron|||	GACCCCGAGTGCGGGGGCAGGAGAAGGAAAACACCCAGGACGAGGAACCC[G/T]CGCGCGTTCTGCCTGGGGATGGGGACTAGGTGGGGAAAGGCGCCCGCACT
650	AM_11351	CYP2A6*2_1799T>A(L160H)	rs1801272	snp	N	19	41354533	A // B	T // A	N/A	-	-	CYP2A6	PA121	NM_000762.5|NP_000753.3|T|L|160|coding-nonsynonymous|A|H|160	CTTCTCCTGCCCCCGCACTCGGGGTCCCCTGCTCACCGCCAGTGCCCCGG[A/T]GGGCGTCGATGAGGAAGCCCGCCTCCTCCTGGATGCGCTCCTCGATGCCT
651	AM_11353	CYP2A6*6_1703G>A(R128Q)	rs4986891	snp	N	19	41354629	A // B	G // A	N/A	-	-	CYP2A6	PA121	NM_000762.5|NP_000753.3|G|R|128|coding-nonsynonymous|A|Q|128	TGCCTCGCTTGCCCACCCCGAAGTCCCGCAGGGTGGCGATGGAGAAGCGC[C/T]GGAGCTGCTTGGCGCGCTCCCCGTTGCTGAATACCACGCCTGGGGAGGTG
652	AM_11358	CYP2A6_51G>A(V17V)	rs1137115	snp	Y	19	41356281	A // B	G // A	N/A	-	-	CYP2A6	PA121	NM_000762.5|NP_000753.3|G|V|17|coding-synonymous|A|V|17	GGCAGCTTCCCCTTGCTCTTCCTCTGCTGCCAAACAGACATCAAGACCAT[C/T]ACAGTCAGGCAGACCAGCAAGGCCACCAGAAGCATCCCTGAGGCCAGCAT
653	AM_11359	CYP2A6_22C>T(L8L)	rs8192720	snp	Y	19	41356310	A // B	C // T	N/A	-	-	CYP2A6	PA121	NM_000762.5|NP_000753.3|C|L|8|coding-synonymous|T|L|8	CCGTCACCATCTATCATCCCACTACCACCATGCTGGCCTCAGGGATGCTT[C/T]TGGTGGCCTTGCTGGTCTGCCTGACTGTAATGGTCTTGATGTCTGTTTGG
654	AM_11360	CYP2A6*13_13G>A(G5R)	rs28399434	snp	Y	19	41356319	A // B	A // G	N/A	-	-	CYP2A6	PA121	NM_000762.5|NP_000753.3|G|G|5|coding-nonsynonymous|A|R|5	CCACCCCAGCCGTCACCATCTATCATCCCACTACCACCATGCTGGCCTCA[A/G]GGATGCTTCTGGTGGCCTTGCTGGTCTGCCTGACTGTAATGGTCTTGATG
655	AM_11361	CYP2A6*9_-48T>G(Promoter)	rs28399433	snp	Y	19	41356379	A // B	T // G	N/A	-	-	CYP2A6	PA121	NM_000762.5|NP_000753.3||||locus-region|||	CATGGTGGTAGTGGGATGATAGATGGTGACGGCTGGGGTGGTTTGCCTTT[A/C]TACTGCCTGAAAAAGAGGGATGGACTTTGGCTGATTACATAATTACCTCA
656	AM_11364	CYP2A6*1D_-1013A>G	rs4803381	snp	N	19	41357344	A // B	G // A	N/A	-	-	CYP2A6	PA121	NM_000762.5||||||||	CCTATTAATATTATGATTGTTGTTTATGTTTCTCATTTTATATAAAGATC[C/T]ACAGAGGACAGAAAACAGACAGTGGGCAGGGGACATGTGTGAGTGGCCCT
657	AM_11365	CYP2A7_c.*97A>G	rs1060096	snp	N	19	41381501	A // B	A // G	N/A	-	-	CYP2A7	PA27102	NM_000764.2|||||mrna-utr|||	GCGGGGTCAGGGCGGGGTTCGCGGAAGAGGCGGGTATAAGAATGGGGGGA[A/G]GATGCGGGAAAGGAAGGGGCGTGGTGGCTAGAGGGAAGAGAAGAAACAGA
658	AM_11366	CYP2A7_c.*95G>C	rs1060095	snp	N	19	41381503	A // B	C // G	N/A	-	-	CYP2A7	PA27102	NM_000764.2|||||mrna-utr|||	AGGCGGGGTCAGGGCGGGGTTCGCGGAAGAGGCGGGTATAAGAATGGGGG[C/G]AAGATGCGGGAAAGGAAGGGGCGTGGTGGCTAGAGGGAAGAGAAGAAACA
659	AM_11367	CYP2A7_c.*88A>C	rs1060094	snp	N	19	41381510	A // B	A // C	N/A	-	-	CYP2A7	PA27102	NM_000764.2|||||mrna-utr|||	CAGGGAAAGGCGGGGTCAGGGCGGGGTTCGCGGAAGAGGCGGGTATAAGA[A/C]TGGGGGGAAGATGCGGGAAAGGAAGGGGCGTGGTGGCTAGAGGGAAGAGA
660	AM_11368	CYP2A7_c.*81T>C	rs1060092	snp	N	19	41381517	A // B	T // C	N/A	-	-	CYP2A7	PA27102	NM_000764.2|||||mrna-utr|||	CCTCTAGCCACCACGCCCCTTCCTTTCCCGCATCTTCCCCCCATTCTTAT[A/G]CCCGCCTCTTCCGCGAACCCCGCCCTGACCCCGCCTTTCCCTGGCCCCGC
661	AM_11369	CYP2A7_c.*60G>C	rs1060091	snp	N	19	41381538	A // B	C // G	N/A	-	-	CYP2A7	PA27102	NM_000764.2|||||mrna-utr|||	GTGCCGGTGCAGGTCTGGTGGGCGGGGCCAGGGAAAGGCGGGGTCAGGGC[C/G]GGGTTCGCGGAAGAGGCGGGTATAAGAATGGGGGGAAGATGCGGGAAAGG
662	AM_11370	CYP2A7_c.*58G>A	rs1060090	snp	N	19	41381540	A // B	A // G	N/A	-	-	CYP2A7	PA27102	NM_000764.2|||||mrna-utr|||	CTGTGCCGGTGCAGGTCTGGTGGGCGGGGCCAGGGAAAGGCGGGGTCAGG[A/G]CGGGGTTCGCGGAAGAGGCGGGTATAAGAATGGGGGGAAGATGCGGGAAA
663	AM_11372	CYP2A7_c.1427A>G(K476R)	rs72547584	snp	N	19	41381656	A // B	A // G	N/A	-	-	CYP2A7	PA27102	NM_000764.2|NP_000755.2|A|K|476|coding-nonsynonymous|G|R|476	CTTCCGCCTCAAGTCCTCCCAGTCACCTAAGGACATTGACGTGTCCCCCA[A/G]ACACGTGGTCTTTGCCACGATCCCACGAAACTACACCATGAGCTTCCTGC
664	AM_11376	CYP2A7_c.931C>T(R311C)	rs3869579	snp	N	19	41383799	A // B	T // C	N/A	-	-	CYP2A7	PA27102	NM_000764.2|NP_000755.2|C|R|311|coding-nonsynonymous|T|C|311	AGCCTTACCCTCCACCTCTGGGTGCTTCATGAGCAGCAAGAAGCCATAGC[A/G]CAGGGTGGTGCTGACCGTCTCGGTGCCTGCAATGAAGAGGTTCAACGTGC
665	AM_11377	CYP2A7_c.903A>G(A301A)	rs2545753	snp	N	19	41383827	A // B	G // A	N/A	-	-	CYP2A7	PA27102	NM_000764.2|NP_000755.2|A|A|301|coding-synonymous|G|A|301	ATGAGCAGCAAGAAGCCATAGCGCAGGGTGGTGCTGACCGTCTCGGTGCC[C/T]GCAATGAAGAGGTTCAACGTGCTCATCATCAGGTTCTTCAAGTAGAACTC
666	AM_11378	CYP2A7_c.902C>G(A301G)	rs2545754	snp	N	19	41383828	A // B	C // G	N/A	-	-	CYP2A7	PA27102	NM_000764.2|NP_000755.2|C|A|301|coding-nonsynonymous|G|G|301	GGAGTTCTACTTGAAGAACCTGATGATGAGCACGTTGAACCTCTTCATTG[C/G]AGGCACCGAGACGGTCAGCACCACCCTGCGCTATGGCTTCTTGCTGCTCA
667	AM_11379	CYP2A7_c.821A>G(H274R)	rs4079366	snp	N	19	41384675	A // B	A // G	N/A	-	-	CYP2A7	PA27102	NM_000764.2|NP_000755.2|A|H|274|coding-nonsynonymous|G|R|274	CACGCTGGATCCCAATTCCCCACAGGACTTCATCGACTCCTTTCTCATCC[A/G]CATGCAGGAGGTACACCCCAGCAGCCAGTGCGGGGAGGTGCAAAGCCAGG
668	AM_11388	CYP2B7P1_C>T(rs3745219)	rs3745219	snp	N	19	41442352	A // B	C // T	N/A	N/A	N/A	CYP2B7P1	PA27106	||||||||	CTCTTTGCCAATGGAAACCGCTGGAAGGTGCTTCGGCGATTCTCTGTGAC[C/T]ACCATGAGGGACTTCGGGATGGGAAAGCGGAGTGTGGAGGAGCGGATTCA
669	AM_11398	CYP2B6*22_-82T>C	rs34223104	snp	Y	19	41497129	A // B	C // T	N/A	+	+	CYP2B6	PA123	NM_000767.4|NP_000758.1||||locus-region|||	TAATGCTCCTGGATGATGATGAAAAAGGAGGTGGGGAATGGATGAAATTT[C/T]ATAACAGGGTGCAGAGGCAGGGTCAGGATAAAAGGCCCAGTTGGAGGCTG
670	AM_11399	CYP2B6*2_64C>T(R22C)	rs8192709	snp	Y	19	41497274	A // B	C // T	N/A	+	+	CYP2B6	PA123	NM_000767.4|NP_000758.1|C|R|22|coding-nonsynonymous|T|C|22	TCCTCCTCTTCCTTGCACTCCTCACAGGACTCTTGCTACTCCTGGTTCAG[C/T]GCCACCCTAACACCCATGACCGCCTCCCACCAGGGCCCCGCCCTCTGCCC
671	AM_11401	CYP2B6*11_136A>G(M46V)	rs35303484	snp	Y	19	41497346	A // B	A // G	N/A	+	+	CYP2B6	PA123	NM_000767.4|NP_000758.1|A|M|46|coding-nonsynonymous|G|V|46	GCCTCCCACCAGGGCCCCGCCCTCTGCCCCTTTTGGGAAACCTTCTGCAG[A/G]TGGATAGAAGAGGCCTACTCAAATCCTTTCTGAGGGTAAGACACAGACGA
672	AM_11402	CYP2B6_12740G>C(P72P)	rs2279341	snp	Y	19	41509950	A // B	C // G	N/A	+	+	CYP2B6	PA123	NM_000767.4|NP_000758.1|G|P|72|coding-synonymous|C|P|72	TGGCAGTTCCGAGAGAAATATGGGGACGTCTTCACGGTACACCTGGGACC[C/G]AGGCCCGTGGTCATGCTGTGTGGAGTAGAGGCCATACGGGAGGCCCTTGT
673	AM_11403	CYP2B6*12_12820G>A(G99E)	rs36060847	snp	Y	19	41510030	A // B	A // G	N/A	+	+	CYP2B6	PA123	NM_000767.4|NP_000758.1|G|G|99|coding-nonsynonymous|A|E|99	GGCCATACGGGAGGCCCTTGTGGACAAGGCTGAGGCCTTCTCTGGCCGGG[A/G]AAAAATCGCCATGGTCGACCCATTCTTCCGGGGATATGGTGAGAGCCTCA
674	AM_11405	CYP2B6*8_13072A>G(K139E)	rs12721655	snp	N	19	41510282	A // B	A // G	N/A	+	+	CYP2B6	PA123	NM_000767.4|NP_000758.1|A|K|139|coding-nonsynonymous|G|E|139	AGGTGCTTCGGCGATTCTCTGTGACCACTATGAGGGACTTCGGGATGGGA[A/G]AGCGGAGTGTGGAGGAGCGGATTCAGGAGGAGGCTCAGTGTCTGATAGAG
675	AM_11406	CYP2B6*14_13076G>A(R140Q)	rs35773040	snp	N	19	41510286	A // B	G // A	N/A	+	+	CYP2B6	PA123	NM_000767.4|NP_000758.1|G|R|140|coding-nonsynonymous|A|Q|140	GCTCCTCTATCAGACACTGAGCCTCCTCCTGAATCCGCTCCTCCACACTC[C/T]GCTTTCCCATCCCGAAGTCCCTCATAGTGGTCACAGAGAATCGCCGAAGC
676	AM_11407	CYP2B6_14593C>G	rs4803418	snp	N	19	41511803	A // B	C // G	N/A	+	+	CYP2B6	PA123	NM_000767.4|NP_000758.1||||intron|||	CAGAAAGAAACAAAGGCAAAGAGAAATTGAGGCAGAGAAAATTAGAGAGA[C/G]AGACAGACAAAGCTTAGGAAAAGGTCTGCAGAGGAATGAGAGAAGACAGG
677	AM_11408	CYP2B6_15582C>T	rs4803419	snp	Y	19	41512792	A // B	T // C	N/A	+	+	CYP2B6	PA123	NM_000767.4|NP_000758.1||||intron|||	ACTGGAAGAGGAAGGTGGGGTCCATGAGGGCCCCTAGGAAGAAGCAGCAG[A/G]TCAAGGACACAGACTGAAGTGCCTGGGGAACATCAGGCTGTCACCTATCT
678	AM_11409	CYP2B6*26_15614C>G(P167A)	rs3826711	snp	Y	19	41512824	A // B	C // G	N/A	+	+	CYP2B6	PA123	NM_000767.4|NP_000758.1|C|P|167|coding-nonsynonymous|G|A|167	TTCAGTCTGTGTCCTTGACCTGCTGCTTCTTCCTAGGGGCCCTCATGGAC[C/G]CCACCTTCCTCTTCCAGTCCATTACCGCCAACATCATCTGCTCCATCGTC
679	AM_11410	CYP2B6*20_15618C>T(T168I)	rs36056539	snp	Y	19	41512828	A // B	T // C	N/A	+	+	CYP2B6	PA123	NM_000767.4|NP_000758.1|C|T|168|coding-nonsynonymous|T|I|168	CAAAGACGATGGAGCAGATGATGTTGGCGGTAATGGACTGGAAGAGGAAG[A/G]TGGGGTCCATGAGGGCCCCTAGGAAGAAGCAGCAGGTCAAGGACACAGAC
680	AM_11411	CYP2B6*6_15631G>T(Q172H)	rs3745274	snp	Y	19	41512841	A // B	T // G	N/A	+	+	CYP2B6	PA123	NM_000767.4|NP_000758.1|G|Q|172|coding-nonsynonymous|T|H|172	TGGAATCGTTTTCCAAAGACGATGGAGCAGATGATGTTGGCGGTAATGGA[A/C]TGGAAGAGGAAGGTGGGGTCCATGAGGGCCCCTAGGAAGAAGCAGCAGGT
681	AM_11413	CYP2B6*27_15708T>C(M198T)	rs36079186	snp	Y	19	41512918	A // B	C // T	N/A	+	+	CYP2B6	PA123	NM_000767.4|NP_000758.1|T|M|198|coding-nonsynonymous|C|T|198	CATCGTCTTTGGAAAACGATTCCACTACCAAGATCAAGAGTTCCTGAAGA[C/T]GCTGAACTTGTTCTACCAGACTTTTTCACTCATCAGCTCTGTATTCGGCC
682	AM_11414	CYP2B6*3_18045C>A(S259R)	rs45482602	snp	Y	19	41515255	A // B	A // C	N/A	+	+	CYP2B6	PA123	NM_000767.4|NP_000758.1|C|S|259|coding-nonsynonymous|A|R|259	GCTTACATTGGCCACAGTGTGGAGAAGCACCGTGAAACCCTGGACCCCAG[A/C]GCCCCCAAGGACCTCATCGACACCTACCTGCTCCACATGGAAAAAGTGGG
683	AM_11415	CYP2B6*4_18053A>G(K262R)	rs2279343	snp	Y	19	41515263	A // B	A // G	N/A	+	+	CYP2B6	PA123	NM_000767.4|NP_000758.1|A|K|262|coding-nonsynonymous|G|R|262	TGGCCACAGTGTGGAGAAGCACCGTGAAACCCTGGACCCCAGCGCCCCCA[A/G]GGACCTCATCGACACCTACCTGCTCCACATGGAAAAAGTGGGGTCTGGGA
684	AM_11416	CYP2B6_18273G>A	rs2279344	snp	Y	19	41515483	A // B	A // G	N/A	+	+	CYP2B6	PA123	NM_000767.4|NP_000758.1||||intron|||	GGAAAGGGAGGAGAGAACATGAGGAAGGAAAGAAAGATGAGGTGAAAGGA[A/G]GGAGAAAATAGGGAGGAGGAACTGAGACAGGGAGAGAGGGGAGGTGGGAA
685	AM_11417	CYP2B6*16_21011T>C(I328T)	rs28399499	snp	Y	19	41518221	A // B	T // C	N/A	+	+	CYP2B6	PA123	NM_000767.4|NP_000758.1|T|I|328|coding-nonsynonymous|C|T|328	TGGCTCGGTCATGAAGCTCTGGAGGGCGATGTGGGCCAATCACCTGTTCA[A/G]TCTCCCTGTAGACTCTCTCTGTACAGAAAAGAAGACCAATGAATCTCATT
686	AM_11418	CYP2B6*19_21034C>T(R336C)	rs34826503	snp	Y	19	41518244	A // B	C // T	N/A	+	+	CYP2B6	PA123	NM_000767.4|NP_000758.1|C|R|336|coding-nonsynonymous|T|C|336	TCTGTACAGAGAGAGTCTACAGGGAGATTGAACAGGTGATTGGCCCACAT[C/T]GCCCTCCAGAGCTTCATGACCGAGCCAAAATGCCATACACAGAGGCAGTC
687	AM_11419	CYP2B6*28_21160C>T(R378X)	rs34097093	snp	Y	19	41518370	A // B	C // T	N/A	+	+	CYP2B6	PA123	NM_000767.4|NP_000758.1|C|R|378|coding-nonsynonymous|T|X|378	ACCTTCTCCCCATGGGTGTGCCCCACATTGTCACCCAACACACCAGCTTC[C/T]GAGGGTACATCATCCCCAAGGTAAGACCGGCTGGAACCCCATAGCCCTCC
688	AM_11420	CYP2B6*15_21388T>A(I391N)	rs35979566	snp	N	19	41518598	A // B	A // T	N/A	+	+	CYP2B6	PA123	NM_000767.4|NP_000758.1|T|I|391|coding-nonsynonymous|A|N|391	AATATCTTTTGATCTTGTGATCCTCCCTCAGGACACAGAAGTATTTCTCA[A/T]CCTGAGCACTGCTCTCCATGACCCACACTACTTTGAAAAACCAGACGCCT
689	AM_11422	CYP2B6*21_21498C>A(P428T)	rs35010098	snp	N	19	41518708	A // B	A // C	N/A	+	+	CYP2B6	PA123	NM_000767.4|NP_000758.1|C|P|428|coding-nonsynonymous|A|T|428	ACCACTTTCTGGATGCCAATGGGGCACTGAAAAAGACTGAAGCTTTTATC[A/C]CCTTCTCCTTAGGTAAGCTGGACCCACAATTTCTTTCCCAGACACCAGAG
690	AM_11423	CYP2B6_21563C>T	rs8192719	snp	N	19	41518773	A // B	C // T	N/A	+	+	CYP2B6	PA123	NM_000767.4|NP_000758.1||||intron|||	AAGCTGGACCCACAATTTCTTTCCCAGACACCAGAGGGCAGGTACTATCC[C/T]CAACTTGAGAAAAACAACGAGAGATACTGATTATTTGAGCACTTAATATA
691	AM_11426	CYP2B6*5_25505C>T(R487C)	rs3211371	snp	N	19	41522715	A // B	C // T	N/A	+	+	CYP2B6	PA123	NM_000767.4|NP_000758.1|C|R|487|coding-nonsynonymous|T|C|487	TGACACCCCAGGAGTGTGGTGTGGGCAAAATACCCCCAACATACCAGATC[C/T]GCTTCCTGCCCCGCTGAAGGGGCTGAGGGAAGGGGGTCAAAGGATTCCAG
692	AM_11440	CYP2A13_2366C>T	rs1645691	snp	N	19	41596742	A // B	C // T	N/A	+	+	CYP2A13	PA27101	NM_000766.3|NP_000757.2||||intron|||	GAGCCTGCTGGCAGGATGCATACCCTCAGCTCAGCTCTCTCACCTGGGCA[C/T]ATGTTCCCATCCCCAACTTACCGTAATTTGTAACAGGTGCTCCCTACCCA
693	AM_11443	CYP2A13_5289C>T(P321L)	rs3885816	snp	N	19	41599665	A // B	C // T	N/A	+	+	CYP2A13	PA27101	NM_000766.3|NP_000757.2|C|P|321|coding-nonsynonymous|T|L|321	GACCGTGAGCACCACCCTGCGCTACGGTTTCCTGCTGCTCATGAAGCACC[C/T]AGAGGTGGAGGGTAAGACTGGAAAGGGAGGAAAGTGAAGGGCCCCAGACC
694	AM_11446	CYP2A13_6432C>T	rs1645694	snp	N	19	41600808	A // B	T // C	N/A	+	+	CYP2A13	PA27101	NM_000766.3|NP_000757.2||||intron|||	AGGGAGGAGGAAGGTGTGTGTAATGAGGCAGGTTGGGGGGATTGGTGAAA[A/G]TACACAGGGGCTGCAGGGGGAACTAGGGTGCCCCAGGTGAGGGGAGTGGC
695	AM_11449	CYP2A13_7233T>G	rs1709082	snp	N	19	41601609	A // B	G // T	N/A	+	+	CYP2A13	PA27101	NM_000766.3|NP_000757.2||||intron|||	TAATATTCCACCCCTCCTCCCTAGAGAGTGCAGCCGGGGGTCAGTAGGGG[G/T]TGAGGCTGCACTGAGAGTGGGCTTCACCTTCACCCCTCCTGCCTCTCCTC
696	AM_11456	CYP2F1_96G>A(P32P)	rs305968	snp	N	19	41622189	A // B	G // A	N/A	+	+	CYP2F1	PA27109	NM_000774.3|NP_000765.2|G|P|32|coding-synonymous|A|P|32	TGGGAGCAAAGCAGCAGCAGGTTTCCCAGGATTGAGAGGGGTCTGGGTCC[C/T]GGAGGCAGCTTTCCCTTATCTCTTGAGCTTAGGGTCAGGAGCAGACAGAC
697	AM_11457	CYP2F1*4_112T>C(S38P)	rs58285195	snp	N	19	41622205	A // B	C // T	N/A	+	+	CYP2F1	PA27109	NM_000774.3|NP_000765.2|T|S|38|coding-nonsynonymous|C|P|38	CCCTAAGCTCAAGAGATAAGGGAAAGCTGCCTCCGGGACCCAGACCCCTC[C/T]CAATCCTGGGAAACCTGCTGCTGCTTTGCTCCCAAGACATGCTGACTTCT
698	AM_11458	CYP2F1*6_388G>C(R98P)	rs57670668	snp	N	19	41622481	A // B	C // G	N/A	+	+	CYP2F1	PA27109	NM_000774.3|NP_000765.2|G|R|98|coding-nonsynonymous|C|P|98	CCAAGCTGTGAAGGAGGCCCTGGTGGACCAGGGAGAGGAGTTTAGTGGCC[C/G]CGGTGACTACCCTGCCTTTTTCAACTTTACCAAGGGCAATGGTAAGCCTC
699	AM_11459	CYP2F1_5308G>C(V175L)	rs2287941	snp	N	19	41627401	A // B	C // G	N/A	N/A	N/A	CYP2F1		NM_000774.3|NP_000765.2|G|V|175|coding-nonsynonymous|C|L|175	ATCATAGTCGAAGCGGCTGCCGAAGAGCACGGAACAGATAATGTTGGACA[C/G]TGAGCGACTCAGCACAAACGTGGGGTCAAAGGGCTCGCCTGAGGGTAAGG
700	AM_11462	CYP2F1*3_11887C>T(P490L)	rs7246981	snp	N	19	41633980	A // B	C // T	N/A	N/A	N/A	CYP2F1		NM_000774.3|NP_000765.2|C|P|490|coding-nonsynonymous|T|L|490	CAGCTCAGGTCTTGGCAATTTGCCGCGGCCTTTCCAGCTGTGCCTGCGCC[C/T]GCGCTAACGCCCCGGCCCTTCCAGATTCGCCTGTGAGCGATGAGGCCCGC
701	AM_11463	CYP2S1_1300G>A(P66P)	rs60694775	snp	N	19	41700469	A // B	G // A	N/A	+	+	CYP2S1	PA27113	NM_030622.6|NP_085125.1|G|P|66|coding-synonymous|A|P|66	CCAACCAGGACCACCACAGGCCGCCACGGTCCCAGGTAGATGGTGAACAC[C/T]GGTCCGTACTTCTTACTCAGCTGGGGGTAGGGAGGAAGAAAGAGGAGGGT
702	AM_11464	CYP2S1_1324C>G(P74P)	rs338599	snp	N	19	41700493	A // B	C // G	N/A	+	+	CYP2S1	PA27113	NM_030622.6|NP_085125.1|C|P|74|coding-synonymous|G|P|74	CCCCAGCTGAGTAAGAAGTACGGACCGGTGTTCACCATCTACCTGGGACC[C/G]TGGCGGCCTGTGGTGGTCCTGGTTGGGCAGGAGGCTGTGCGGGAGGCCCT
703	AM_11465	CYP2S1_4594G>A(G141G)	rs16975056	snp	N	19	41703763	A // B	A // G	N/A	+	+	CYP2S1	PA27113	NM_030622.6|NP_085125.1|G|G|141|coding-synonymous|A|G|141	AGGCAGCTGAGGAAGTTTACCATGCTTGCTCTGCGGGACCTGGGCATGGG[A/G]AAGCGAGAAGGCGAGGAGCTGATCCAGGCGGAGGCCCGGTGTCTGGTGGA
704	AM_11466	CYP2S1_4624G>A(A151A)	rs57266494	snp	N	19	41703793	A // B	G // A	N/A	+	+	CYP2S1	PA27113	NM_030622.6|NP_085125.1|G|A|151|coding-synonymous|A|A|151	CCATGCTGACCTTCTGTCCCCTGGAATGTCTCCACCAGACACCGGGCCTC[C/T]GCCTGGATCAGCTCCTCGCCTTCTCGCTTCCCCATGCCCAGGTCCCGCAG
705	AM_11474	SULT2A1_c.*161C>G	rs296365	snp	N	19	48374551	A // B	G // C	N/A	-	-	SULT2A1	PA346	NM_003167.3|||||mrna-utr|||	CCTCCCATAGTGCTGGGATTACAGGCATGAACCACCGTGCCTGGCCAACC[C/G]TGGTAACTTTTAACAAGGAAGGGATCAGAGATGCAGAGGTTTGATATTTA
706	AM_11475	SULT2A1_c.781G>A(A261T)	rs11569679	snp	N	19	48374789	A // B	A // G	N/A	-	-	SULT2A1	PA346	NM_003167.3|NP_003158.2|G|A|261|coding-nonsynonymous|A|T|261	GCTTCTTGTTTCCAGGTGTATCTGGGGACTGGAAAAATCACTTCACAGTG[A/G]CCCAAGCTGAAGACTTTGATAAATTGTTCCAAGAGAAGATGGCAGATCTT
707	AM_11476	SULT2A1_c.679A>G(K227E)	rs11569680	snp	N	19	48377980	A // B	G // A	N/A	-	-	SULT2A1	PA346	NM_003167.3|NP_003158.2|A|K|227|coding-nonsynonymous|G|E|227	TGCTTTGTCCACTACATAATCAACACTCAGGAGGGAATAATTGGACATCT[C/T]GTTTTCTTTCATGCTCTGAAAGGAGCTGTTCTTGAGAATTAAGTTCAGTT
708	AM_11478	SULT2A1_c.90C>T(F30F)	rs11083907	snp	N	19	48389425	A // B	C // T	N/A	-	-	SULT2A1	PA346	NM_003167.3|NP_003158.2|C|F|30|coding-synonymous|T|F|30	CCTACTATGGGTTTCAGATCCGAAACCTTAAGAAAAGTACGTGATGAGTT[C/T]GTGATAAGGGATGAAGATGTAATAATATTGACTTACCCCAAATCAGGTAA
709	AM_11479	SULT2A1_c.89T>C(F30S)	rs17851828	snp	N	19	48389426	A // B	T // C	N/A	-	-	SULT2A1	PA346	NM_003167.3|NP_003158.2|T|F|30|coding-nonsynonymous|C|S|30	TACCTGATTTGGGGTAAGTCAATATTATTACATCTTCATCCCTTATCACA[A/G]ACTCATCACGTACTTTTCTTAAGGTTTCGGATCTGAAACCCATAGTAGGG
710	AM_11480	SULT2A1_c.6G>A(S2S)	rs11569685	snp	N	19	48389509	A // B	G // A	N/A	-	-	SULT2A1	PA346	NM_003167.3|NP_003158.2|G|S|2|coding-synonymous|A|S|2	CTGAAACCCATAGTAGGGAAAGCTATGCCTTCAAACCATAAGAAATCGTC[C/T]GACATGATGATGACCTCTTCCTGCGTGGTGTGAGGGTTTCAACTGTAGCC
711	AM_11482	SULT2B1_c.120C>T(P40P)	rs2544794	snp	N	19	49079246	A // B	C // T	N/A	+	+	SULT2B1	PA36249	NM_177973.1|NP_814444.1|C|P|40|coding-synonymous|T|P|40	AGCCAGAAGTTGCCAGGTGAATACTTCCGGTACAAGGGCGTCCCCTTCCC[C/T]GTCGGCCTGTACTCGCTCGAGAGCATCAGCTTGGCGGAGAACACCCAAGA
712	AM_11483	SULT2B1_c.152T>C(L51S)	rs16982149	snp	N	19	49079278	A // B	C // T	N/A	+	+	SULT2B1	PA36249	NM_177973.1|NP_814444.1|T|L|51|coding-nonsynonymous|C|S|51	CAAGGGCGTCCCCTTCCCCGTCGGCCTGTACTCGCTCGAGAGCATCAGCT[C/T]GGCGGAGAACACCCAAGATGTGCGGGACGACGACATCTTTATCATCACCT
713	AM_11484	SULT2B1_c.330C>T(A110A)	rs1052124	snp	N	19	49090601	A // B	C // T	N/A	+	+	SULT2B1	PA36249	NM_177973.1|NP_814444.1|C|A|110|coding-synonymous|T|A|110	TCCGTGCCCATCTGGGAGCGGGCACCCTGGTGTGAGACCATTGTGGGTGC[C/T]TTCAGCCTCCCGGACCAGTACAGCCCCCGCCTCATGAGCTCCCATCTTCC
714	AM_11486	SULT2B1_c.600G>A(K200K)	rs16982159	snp	N	19	49096028	A // B	A // G	N/A	+	+	SULT2B1	PA36249	NM_177973.1|NP_814444.1|G|K|200|coding-synonymous|A|K|200	GTGCAGTTTGGCTCCTGGTTCGACCACATTAAGGGCTGGCTTCGGATGAA[A/G]GGCAAAGACAACTTCCTATTTATCACCTACGAGGAGCTGCAGCAGGTGAG
715	AM_11487	SULT2B1_c.637C>T(L213L)	rs2302948	snp	N	19	49096065	A // B	T // C	N/A	+	+	SULT2B1	PA36249	NM_177973.1|NP_814444.1|C|L|213|coding-synonymous|T|L|213	GGTATGGGGGGGACGCTGCACCTGGAGGAGGTGGGGACTCACCTGCTGCA[A/G]CTCCTCGTAGGTGATAAATAGGAAGTTGTCTTTGCCCTTCATCCGAAGCC
716	AM_11489	SULT2B1_c.718G>A(V240I)	rs2302947	snp	N	19	49100068	A // B	A // G	N/A	+	+	SULT2B1	PA36249	NM_177973.1|NP_814444.1|G|V|240|coding-nonsynonymous|A|I|240	GCATCTGTGGGTTCCTGGGCCGTCCGCTGGGCAAGGAGGCACTGGGCTCC[A/G]TCGTGGCACACTCAACCTTCAGCGCCATGAAGGCCAACACCATGTCCAAC
717	AM_11490	SULT2B1_c.834C>T(C278C)	rs1132054	snp	N	19	49102399	A // B	C // T	N/A	+	+	SULT2B1	PA36249	NM_177973.1|NP_814444.1|C|C|278|coding-synonymous|T|C|278	CTCCCCAGAGGCTCCTCACCCCCTGGTGCCCCCTCTTCTCCAGGGGTCTG[C/T]GGCGACTGGAAGAACCACTTCACGGTGGCCCAGAGCGAAGCCTTCGATCG
718	AM_11498	CDA_c.-88G>A	rs602946	snp	N	1	20915535	A // B	A // G	N/A	+	+	CDA	PA98	NM_001785.2|||||mrna-utr|||	AGCTGCGTACCTGAGAGCCTGCGGTCTGGCTGCAGGGACACACCCAAGGG[A/G]AGGAGCTGCAATCGTGTCTGGGGCCCCAGCCCAGGCTGGCCGGAGCTCCT
719	AM_11499	CDA*2_c.79A>C(K27Q)	rs2072671	snp	N	1	20915701	A // B	C // A	N/A	+	+	CDA	PA98	NM_001785.2|NP_001776.1|A|K|27|coding-nonsynonymous|C|Q|27	GAGCAGGGCAGCCCCCACAGGAAAGTGACTGTAGGGGCAGTAGGCTGACT[G/T]CTTGGCCTCCTGGGAGCAAACCAGCAGCTGCTGGACACACTCAGGCTTCA
720	AM_11500	CDA_c.154+1015A>G	rs818202	snp	N	1	20916791	A // B	G // A	N/A	+	+	CDA	PA98	NM_001785.2|NP_001776.1||||intron|||	AGCTTTTGGAGTCAGGGGAAGTCTGGGTTCCAATCCCAGCTCTGTGATTT[C/T]GAGCTCTGAAACTTTCCAAACCTGTTTCCTTCTCTGCCTTTCAGGGTTGC
721	AM_11501	CDA_c.154+3136T>C	rs10916824	snp	N	1	20918912	A // B	C // T	N/A	+	+	CDA	PA98	NM_001785.2|NP_001776.1||||intron|||	AGGTCACAAATGATAGCTGCTTCTGCTACCACTATTAATGCTATCATTAT[C/T]CTTATTATCTGGAGGCAGATTGTGGAGGACTTTTGGAGGCCAAACAGAGA
722	AM_11506	CDA*3_c.208G>A(A70T)	rs60369023	snp	Y	1	20931474	A // B	A // G	N/A	+	+	CDA	PA98	NM_001785.2|NP_001776.1|G|A|70|coding-nonsynonymous|A|T|70	GCAACATAGAAAATGCCTGCTACCCGCTGGGCATCTGTGCTGAACGGACC[A/G]CTATCCAGAAGGCCGTCTCAGAAGGGTACAAGGATTTCAGGGCAATTGCT
723	AM_11520	CDA_c.435C>T(T145T)	rs1048977	snp	N	1	20945055	A // B	C // T	N/A	+	+	CDA	PA98	NM_001785.2|NP_001776.1|C|T|145|coding-synonymous|T|T|145	GTCCAGGAGCTGCTGCCCTCCTCCTTTGGGCCTGAGGACCTGCAGAAGAC[C/T]CAGTGACAGCCAGAGAATGCCCACTGCCTGTAACAGCCACCTGGAGAACT
724	AM_11525	FAAH_c.385C>A(P129T)	rs324420	snp	Y	1	46870761	A // B	A // C	N/A	+	+	FAAH	PA27955	NM_001441.2|NP_001432.2|C|P|129|coding-nonsynonymous|A|T|129	ACTGTGTGACCTCCTATCTGGCTGACTGTGAGACTCAGCTGTCTCAGGCC[A/C]CAAGGCAGGGCCTGCTCTATGGCGTCCCTGTGAGCCTCAAGGAGTGCTTC
725	AM_11526	FAAH_c.1109A>G(H370R)	rs12094805	snp	N	1	46874804	A // B	A // G	N/A	+	+	FAAH	PA27955	NM_001441.2|NP_001432.2|A|H|370|coding-nonsynonymous|G|R|370	CACCCCTCAATCCCTGCAGCTGGTTCCCTTCTTGCCAAGCAACATACCCC[A/G]TGCTCTGGAGACCCTGTCAACAGGTGGGCTCTTCAGTGATGGTGGCCACA
726	AM_11539	CYP4B1_c.330G>A(K110K)	rs7513658	snp	N	1	47276819	A // B	A // G	N/A	+	+	CYP4B1	PA27119	NM_000779.3|NP_000770.2|G|K|110|coding-synonymous|A|K|110	GGAACCCCGGGTCCCTGCTTGACCTGATTGTCTCCTCCTGCAGACCCTAA[A/G]GCCCCTGATGTGTATGACTTCTTCCTCCAGTGGATTGGTGAGTGAGCACC
727	AM_11543	CYP4B1_c.517C>T(R173W)	rs4646487	snp	N	1	47279175	A // B	C // T	N/A	+	+	CYP4B1	PA27119	NM_000779.3|NP_000770.2|C|R|173|coding-nonsynonymous|T|W|173	ACACATTGCCTCCTATCCCTGGACTCCAGGACAAGTGGGAAGAGAAAGCT[C/T]GGGAGGGTAAGTCCTTTGACATCTTCTGCGATGTGGGTCACATGGCGCTG
728	AM_11546	CYP4B1_c.881_882delAT(D294X)	rs3215983	in-del	N	1	47280747	A // B	- // AT	N/A	+	+	CYP4B1	PA27119	NM_000779.3|NP_000770.2|AT|D|294|coding-nonsynonymous|-|X|294	ACCCACCTCCAATACCTCAAGCTGTCCTATTATGCCTTCCCTAACCCAGG[-/AT]GAAGATGACATCAAACTGTCAGATGCAGACCTCCGGGCTGAAGTGGACAC
729	AM_11547	CYP4B1*4_c.964A>G(S322G)	rs45467195	snp	N	1	47280830	A // B	G // A	N/A	+	+	CYP4B1	PA27119	NM_000779.3|NP_000770.2|A|S|322|coding-nonsynonymous|G|G|322	CTGGTGCTCAGGGTACAGGGCCATGCAGTAGAGAAACCAGGAGATACCAC[C/T]GGTGGTGGTGTCATGGCCTTCAAACATGAATGTGTCCACTTCAGCCCGGA
730	AM_11549	CYP4B1_c.993G>A(M331I)	rs2297810	snp	N	1	47280859	A // B	G // A	N/A	+	+	CYP4B1	PA27119	NM_000779.3|NP_000770.2|G|M|331|coding-nonsynonymous|A|I|331	ATCTCGCGGACCTCCTCTCTACAACGATGCTGGTGCTCAGGGTACAGGGC[C/T]ATGCAGTAGAGAAACCAGGAGATACCACTGGTGGTGGTGTCATGGCCTTC
731	AM_11550	CYP4B1_c.1018C>T(R340C)	rs4646491	snp	N	1	47280884	A // B	C // T	N/A	+	+	CYP4B1	PA27119	NM_000779.3|NP_000770.2|C|R|340|coding-nonsynonymous|T|C|340	GTATCTCCTGGTTTCTCTACTGCATGGCCCTGTACCCTGAGCACCAGCAT[C/T]GTTGTAGAGAGGAGGTCCGCGAGATCCTAGGGGACCAGGACTTCTTCCAG
732	AM_11554	CYP4B1_c.1123C>T(R375C)	rs2297809	snp	N	1	47282772	A // B	C // T	N/A	+	+	CYP4B1	PA27119	NM_000779.3|NP_000770.2|C|R|375|coding-nonsynonymous|T|C|375	ATGATCTGGGCAAAATGACTTATCTGACCATGTGCATCAAGGAGAGCTTC[C/T]GCCTCTACCCACCTGTGCCCCAGGTGTACCGCCAGCTCAGCAAGCCTGTC
733	AM_11564	CYP4A11_c.*3733A>G	rs11211402	snp	N	1	47392054	A // B	G // A	N/A	-	-	CYP4A11	PA27118	NM_000778.3||||||||	TTGTGATTTTATTTTTCTGAGGAACCACAAATTGTTTTGCAAATTGACCA[C/T]GCCAATTTACATTCACCAGTAATTCATAAGAGTTTCAATTTCTCCATATT
734	AM_11576	CYP4A11_c.*61A>T	rs9333037	snp	N	1	47395726	A // B	T // A	N/A	-	-	CYP4A11	PA27118	NM_000778.3|||||mrna-utr|||	ACAGCAGGCAGGTGGGAAGAAGGGAAGGTGGGCAGACAGAAAACAGGATA[A/T]GGGCAGACAGGAAGGGGACAGAAGCGGGGGTCAGGAAGACAGGACGGCAG
735	AM_11595	CYP4A11_c.338-13T>C	rs72547594	snp	N	1	47403031	A // B	C // T	N/A	-	-	CYP4A11	PA27118	NM_000778.3|||||intron|||	AGCCTCTAAGACTGCCTTCTTAGTAACTCCTAGTTTCCTATAAAGCCCTT[C/T]CTTGCCTTTCAGACCCGAAATCCCATGGTTCCTACAGATTCCTGGCTCCA
736	AM_11597	CYP4A11_c.-112C>T	rs9332979	snp	N	1	47407217	A // B	C // T	N/A	-	-	CYP4A11	PA27118	NM_000778.3|||||mrna-utr|||	CATCCATAGTCAATTGATTCTGAACTCTGAGGTCCAAGTTCTGCCCTCCT[C/T]CTTCACTCTCCCCACAAGTGGGCGGGACAATCCTCCCTGGATTTGAGCAC
737	AM_11608	CYP4Z1_c.876+394T>G	rs2653927	snp	N	1	47560735	A // B	G // T	N/A	+	+	CYP4Z1	PA134941057	NM_178134.2|NP_835235.1||||intron|||	ACTTACTTATATGATAACTGATACATATTGAACTTCCCTTGTGAAGATTT[G/T]CCTGCTTGTCCTCCCAGGGCTTTCCCTCATGCCTCCAGTGTCACATTTTA
738	AM_11609	CYP4Z1_c.1170T>C(I390I)	rs4926802	snp	N	1	47571902	A // B	C // T	N/A	+	+	CYP4Z1	PA134941057	NM_178134.2|NP_835235.1|T|I|390|coding-synonymous|C|I|390	CGCCTCTACGCACCGGTAGTAAACATATCCCGGTTACTCGACAAACCCAT[C/T]ACCTTTCCAGATGGACGCTCCTTACCTGCAGGTCTTAAAACTTTTTTTTT
739	AM_11611	CYP4Z1_c.1202-2730A>C	rs7512729	snp	N	1	47578471	A // B	C // A	N/A	+	+	CYP4Z1	PA134941057	NM_178134.2|NP_835235.1||||intron|||	TATAAATGTAATAAATTATATTAATGGATTCCTAATATTGAACAATCTTT[G/T]CAGTTTTGGAATATGACCTACTTACTTGGCCATGATGCACTGTTTTATTT
740	AM_11613	CYP4Z1_c.*1183T>G	rs7554948	snp	N	1	47584789	A // B	G // T	N/A	+	+	CYP4Z1	PA134941057	NM_178134.2||||||||	GTAGAAGATAATCAATGGATAGAAGAACTCACAAGTTAGGACGCAGAGGT[G/T]GTCAGATTGGACTTTTTAAATTCCAGACATTACTAAAACGTAAGACTATG
741	AM_11621	CYP2J2_33084T>A(V499V)	rs2228114	snp	N	1	60359335	A // B	A // T	N/A	-	-	CYP2J2	PA27112	NM_000775.2|NP_000766.2|T|V|499|coding-synonymous|A|V|499	TTTAGAATGGGTATCACCATTTCCCCAGTCAGTCACCGCCTCTGCGCTGT[A/T]CCTCAGGTGTAATATTGTTAAGAAAGAAAGGGGCAAGGAAAGTAAGAAGA
742	AM_11622	CYP2J2*6_25662A>T(N404Y)	rs72547598	snp	N	1	60366757	A // B	T // A	N/A	-	-	CYP2J2	PA27112	NM_000775.2|NP_000766.2|A|N|404|coding-nonsynonymous|T|Y|404	TGTGTCAGGGGTGGCCCACTCTGTGGGGTCCCTGTGCAGCGCCGTCAAAT[A/T]GGTCAGGATCATGGTACCCTAGAGAAAGCAGCAGAGACTCAGGCAAGGCT
743	AM_11624	CYP2J2_21818T>A(L378Q)	rs1056596	snp	N	1	60370601	A // B	A // T	N/A	-	-	CYP2J2	PA27112	NM_000775.2|NP_000766.2|T|L|378|coding-nonsynonymous|A|Q|378	CACCAATGCTGTCATCCATGAGGTGCAGAGAATGGGCAACATCATCCCCC[A/T]GAACGTTCCCAGGGAAGTGACAGTTGATACCACTTTGGCTGGGTACCACC
744	AM_11625	CYP2J2*5_21709G>A(D342N)	rs56053398	snp	N	1	60370710	A // B	G // A	N/A	-	-	CYP2J2	PA27112	NM_000775.2|NP_000766.2|G|D|342||||342	GGACTCCCGGGCGGCTGTGCTCGGCTGCTGCCCCTGGCCAATCACTCTGT[C/T]AATCTCAGCTTGTACTTTTTCTGGTAAAGAGGGAAGGGTTCTATTATTTT
745	AM_11627	CYP2J2*4_15029T>A(I192N)	rs66515830	snp	N	1	60377389	A // B	A // T	N/A	-	-	CYP2J2	PA27112	NM_000775.2|NP_000766.2|T|I|192|coding-nonsynonymous|A|N|192	ACAGCCTTTTGACCCTCATTTCAAGATCAACAATGCAGTTTCCAATATCA[A/T]TTGCTCCATCACCTTCGGAGAACGCTTTGAGTACCAGGATAGTTGGTTTC
746	AM_11629	CYP2J2*3_14533C>T(R158C)	rs56307989	snp	N	1	60377885	A // B	C // T	N/A	-	-	CYP2J2	PA27112	NM_000775.2|NP_000766.2|C|R|158||||158	CTCTGACAGCACTAAGGAACTTTGGTTTAGGAAAGAAGAGCTTAGAGGAA[C/T]GCATTCAGGAGGAGGCCCAACACCTCACTGAAGCAATAAAAGAGGAGAAC
747	AM_11630	CYP2J2*2_14488A>G(T143A)	rs55753213	snp	N	1	60377930	A // B	A // G	N/A	-	-	CYP2J2	PA27112	NM_000775.2|NP_000766.2|A|T|143|coding-nonsynonymous|G|A|143	TGATTATGTCAAGTGGCCAGGCATGGAAGGAGCAAAGAAGGTTCACTCTG[A/G]CAGCACTAAGGAACTTTGGTTTAGGAAAGAAGAGCTTAGAGGAACGCATT
748	AM_11632	CYP2J2_10769C>G(R111R)	rs1056595	snp	N	1	60381650	A // B	C // G	N/A	-	-	CYP2J2	PA27112	NM_000775.2|NP_000766.2|C|R|111|coding-synonymous|G|R|111	CCCTTAATCAAAGAAGCCCTTATCCACATGGACCAAAACTTTGGGAACCG[C/G]CCCGTGACCCCTATGCGAGAACATATCTTTAAGAAAAATGGTAAGTTTCT
749	AM_11637	CYP2J2*7_-76G>T(Promoter)	rs890293	snp	Y	1	60392494	A // B	G // T	N/A	-	-	CYP2J2	PA27112	NM_000775.2|NP_000766.2||||locus-region|||	CGCAGGGTGCTGCGAAGGGGCGGGCTGGGAGGCGGGGCACGGCTGGGAGC[G/T]AGGCGGGGCGGGGACCGTCGCCTGCTGGGACCGCCGCCTGCTTGGACCGC
750	AM_11639	DPYD*10_c.2983G>T(V995F)	rs1801268	snp	N	1	97544627	A // B	G // T	N/A	-	-	DPYD	PA145	NM_000110.3|NP_000101.2|G|V|995|coding-nonsynonymous|T|F|995	ACCTGCCCACCATAACCGACACTTGTACAGGCTGTACTCTGTGTCTCAGT[G/T]TTTGCCCTATTGTCGACTGCATCAAAATGGTTTCCAGGACAACACCTTAT
751	AM_11643	DPYD*9B_c.2657G>A(R886H)	rs1801267	snp	Y	1	97564154	A // B	A // G	N/A	-	-	DPYD	PA145	NM_000110.3|NP_000101.2|G|R|886|coding-nonsynonymous|A|H|886	TGTGTTTTCCTTTTAGAAACTGCCAAGTTTTGGACCTTATCTGGAACAGC[A/G]CAAGAAAATCATAGCAGAAAACAAGATTAGACTGAAAGAACAAAATGTAG
752	AM_11647	DPYD*2_c.1905+1G>A	rs3918290	snp	N	1	97915614	A // B	A // G	N/A	-	-	DPYD	PA145	NM_000110.3|NP_000101.2||||intron|||	CATATTGGTGTCAAAGTGTCACTGAACTAAAGGCTGACTTTCCAGACAAC[A/G]TAAGTGTGATTTAACATCTAAAACAAGAGAATTGGCATAAGTTGGTGAAT
753	AM_11648	DPYD_c.1905C>T(N635N)	rs3918289	snp	N	1	97915615	A // B	C // T	N/A	-	-	DPYD	PA145	NM_000110.3|NP_000101.2|C|N|635|coding-synonymous|T|N|635	GCATATTGGTGTCAAAGTGTCACTGAACTAAAGGCTGACTTTCCAGACAA[C/T]GTAAGTGTGATTTAACATCTAAAACAAGAGAATTGGCATAAGTTGGTGAA
754	AM_11649	DPYD*3_c.1897delC(P633X)	rs72549303	in-del	N	1	97915622	A // B	- // C	N/A	-	-	DPYD	PA145	NM_000110.3|NP_000101.2|C|P|633|coding-nonsynonymous|-|X|633	AACGGCTGCATATTGGTGTCAAAGTGTCACTGAACTAAAGGCTGACTTTC[-/C]AGACAACGTAAGTGTGATTTAACATCTAAAACAAGAGAATTGGCATAAGT
755	AM_11650	DPYD_c.1896T>C(F632F)	rs17376848	snp	N	1	97915624	A // B	T // C	N/A	-	-	DPYD	PA145	NM_000110.3|NP_000101.2|T|F|632|coding-synonymous|C|F|632	TTATGCCAATTCTCTTGTTTTAGATGTTAAATCACACTTACGTTGTCTGG[A/G]AAGTCAGCCTTTAGTTCAGTGACACTTTGACACCAATATGCAGCCGTTTT
756	AM_11651	DPYD*13_c.1679T>G(I560S)	rs55886062	snp	N	1	97981343	A // B	T // G	N/A	-	-	DPYD	PA145	NM_000110.3|NP_000101.2|T|I|560||||560	AGAAAGTTTTGGTGAGGGCAAAACCCCATCCAGCTTCAAAAGCTCTTCGA[A/C]TCATTGATGTGCTGGTGGCTGGAGTTGCGCTAGCAAGACCAAAAGGATTT
757	AM_11653	DPYD*4_c.1601G>A(S534N)	rs1801158	snp	N	1	97981421	A // B	G // A	N/A	-	-	DPYD	PA145	NM_000110.3|NP_000101.2|G|S|534|coding-nonsynonymous|A|N|534	CGCTAGCAAGACCAAAAGGATTTATAAACTTCAATCCGGCCATTTCTACA[C/T]TAATGTCCACCAGATCAATAGGAGTGTAAAAGAGGGGTAGTTCAGGCTTG
758	AM_11658	DPYD_c.1074T>A(R358R)	rs1042479	snp	N	1	98058828	A // B	A // T	N/A	-	-	DPYD	PA145	NM_000110.3|NP_000101.2|T|R|358|coding-synonymous|A|R|358	GACACTGCCTTTGACTGTGCAACATCTGCTCTACGTTGTGGAGCTCGCCG[A/T]GTGTTCATCGTCTTCAGAAAAGGCTTTGTTAATATAAGAGCTGTCCCTGA
759	AM_11659	DPYD_c.1035T>C(F345F)	rs1042478	snp	N	1	98058867	A // B	C // T	N/A	-	-	DPYD	PA145	NM_000110.3|NP_000101.2|T|F|345|coding-synonymous|C|F|345	CCATCGATACGGGGAGTCGTGATTGTACTTGGAGCTGGAGACACTGCCTT[C/T]GACTGTGCAACATCTGCTCTACGTTGTGGAGCTCGCCGTGTGTTCATCGT
760	AM_11660	DPYD*11_c.1003G>T(V335L)	rs72549306	snp	N	1	98058899	A // B	T // G	N/A	-	-	DPYD	PA145	NM_000110.3|NP_000101.2|G|V|335|coding-nonsynonymous|T|L|335	AGCAGATGTTGCACAGTCAAAGGCAGTGTCTCCAGCTCCAAGTACAATCA[A/C]GACTCCCCGTATCGATGGCAATGGAGAGTGACAGGCGCACATTCCTGAAT
761	AM_11662	DPYD_c.756T>C(G252G)	rs6675198	snp	N	1	98157279	A // B	T // C	N/A	-	-	DPYD	PA145	NM_000110.3|NP_000101.2|T|G|252|coding-synonymous|C|G|252	CTTTCTTTTTGAGCAGTACACAGATAGGTGTTTTTTTCATTTACCTTTAC[A/G]CCAAGGTCCTTCATTAGCTCAATCTCAAAATTCACTACATCATACGGCAG
762	AM_11663	DPYD*8_c.703C>T(R235W)	rs1801266	snp	N	1	98157332	A // B	C // T	N/A	-	-	DPYD	PA145	NM_000110.3|NP_000101.2|C|R|235|coding-nonsynonymous|T|W|235	CCTGTTTTTCTTTCTCCTTTCTTTTCAGTACTTCTGAAATTCCTCAGTTC[C/T]GGCTGCCGTATGATGTAGTGAATTTTGAGATTGAGCTAATGAAGGACCTT
763	AM_11666	DPYD_c.525G>A(S175S)	rs6670886	snp	N	1	98165062	A // B	G // A	N/A	-	-	DPYD	PA145	NM_000110.3|NP_000101.2|G|S|175|coding-synonymous|A|S|175	AGAGCAATCTTTGCAGAATAGGCTTCAGACATTTTTTCTGGGGGAGGCAG[C/T]GAAGGATTTCTGATCTGTGGGATACTCATTGCTTTGAATACCTACGGGGA
764	AM_11667	DPYD_c.496A>G(M166V)	rs2297595	snp	N	1	98165091	A // B	A // G	N/A	-	-	DPYD	PA145	NM_000110.3|NP_000101.2|A|M|166|coding-nonsynonymous|G|V|166	TTTCAAAATTTTAACCATGACAATTGATTTCCCCGTAGGTATTCAAAGCA[A/G]TGAGTATCCCACAGATCAGAAATCCTTCGCTGCCTCCCCCAGAAAAAATG
765	AM_11668	DPYD*7_c.295delTCAT	rs72549309	in-del	N	1	98205971	A // B	- // TCAT	N/A	-	-	DPYD	PA145	NM_000110.3|NP_000101.2|TCAT|SF|100||||100	GTGCAGATGCCCCGTGTCAGAAGAGCTGTCCAACTAATCTTGATATTAAA[-/TCAT]TCATCACAAGTATTGCAAACAAGGTAAATTCAGATTTAACTCTGCAAATG
766	AM_11669	DPYD*9_c.85T>C(C29R)	rs1801265	snp	N	1	98348885	A // B	C // T	N/A	-	-	DPYD	PA145	NM_000110.3|NP_000101.2|T|C|29|coding-nonsynonymous|C|R|29	TTTAGAGTATCCTGGCTTTAAATCCTCGAACACAAACTCATGCAACTCTG[C/T]GTTCCACTTCGGCCAAGAAATTAGACAAGAAACATTGGAAAAGAAATCCT
767	AM_11670	DPYD_c.61C>T(R21X)	rs72549310	snp	N	1	98348909	A // B	C // T	N/A	-	-	DPYD	PA145	NM_000110.3|NP_000101.2|C|R|21|coding-nonsynonymous|T|X|21	TATTTACACATTGTTTATGCTGTCTTTAGAGTATCCTGGCTTTAAATCCT[C/T]GAACACAAACTCATGCAACTCTGCGTTCCACTTCGGCCAAGAAATTAGAC
768	AM_11677	GSTM4_c.398C>A(T133K)	rs3211193	snp	N	1	110201473	A // B	A // C	N/A	+	+	GSTM4	PA29026	NM_000850.4|NP_000841.1|C|T|133|coding-nonsynonymous|A|K|133	TTTTCTGCCTCAGGAGAAACTGAAGCCAGAATACTTGGAGGAACTTCCTA[A/C]AATGATGCAGCACTTCTCACAGTTCCTGGGGAAGAGGCCATGGTTTGTTG
769	AM_11686	GSTM4_c.446T>C(V149A)	N/A	snp	N	1	110201521	A // B	T // C	N/A	+	+	GSTM4	PA29026	NM_000850.3|NP_000841.1|T|V|149|coding-nonsynonymous|C|A|149	ATGGCAAATCTCTAGTGTCCTCATCACATGCCCCCATTACCTTGTCTCCA[A/G]CAAACCATGGCCTCTTCCCCAGGAACTGTGAGAAGTGCTGCATCATTGTA
770	AM_11688	GSTM4_c.534C>T(F178F)	rs506008	snp	N	1	110201699	A // B	T // C	N/A	+	+	GSTM4	PA29026	NM_000850.4|NP_000841.1|C|F|178|coding-synonymous|T|F|178	GAGGATGGGGGCATCACCTCAAAGCGGGAGATGAAGTCCTTCAGATTTGG[A/G]AAGGCGTCCAAGCAGTTGGGCTCAAATATACGGTGGAGGTCAAGGACATC
771	AM_11692	GSTM2_c.36+7G>C	rs530021	snp	N	1	110210780	A // B	C // G	N/A	+	+	GSTM2	PA29023	NM_000848.3|NP_000839.1||||intron|||	CCAGCACCATGCCCATGACACTGGGGTACTGGAACATCCGCGGGGTGAGC[C/G]AGGGTCCGCTGGGCGGTGGGACGGGGGTGCGTGGGGGCGGGGAAGTGTGG
772	AM_11695	GSTM2_c.222C>T(N74N)	rs592792	snp	N	1	110211956	A // B	T // C	N/A	+	+	GSTM2	PA29026	NM_000848.3|NP_000839.1|C|N|74|coding-synonymous|T|N|74	CAAATCTACTCACACAGGTTGTGCTTGCGGGCAATGTACCGCAGGATGGC[A/G]TTGCTCTGGGTGATCTTGTGAGTCCCATCAATCAAGTAGGGCAGCTGGAT
773	AM_11697	GSTM2_c.401T>A(M134K)	rs1056799	snp	N	1	110213949	A // B	A // T	N/A	+	+	GSTM2	PA29023	NM_000848.3|NP_000839.1|T|M|134|coding-nonsynonymous|A|K|134	TCTGCCTCAGGAGAAACTGAAACCAGAATACCTGCAGGCACTCCCTGAAA[A/T]GCTGAAGCTCTACTCACAGTTTCTGGGGAAGCAGCCATGGTTTCTTGGGG
774	AM_11698	GSTM2_c.405G>A(L135L)	rs1056800	snp	N	1	110213953	A // B	G // A	N/A	+	+	GSTM2	PA29023	NM_000848.3|NP_000839.1|G|L|135|coding-synonymous|A|L|135	TTGTCCCCAAGAAACCATGGCTGCTTCCCCAGAAACTGTGAGTAGAGCTT[C/T]AGCATTTCAGGGAGTGCCTGCAGGTATTCTGGTTTCAGTTTCTCCTGAGG
775	AM_11699	GSTM2_c.443T>C(F148S)	rs11540636	snp	N	1	110213991	A // B	C // T	N/A	+	+	GSTM2	PA29023	NM_000848.3|NP_000839.1|T|F|148|coding-nonsynonymous|C|S|148	CCCTGAAATGCTGAAGCTCTACTCACAGTTTCTGGGGAAGCAGCCATGGT[C/T]TCTTGGGGACAAGGTAATGGGGGCGTGTGATGGGGACACCACAGATTTGT
776	AM_11702	GSTM1_c.84T>C(Y28Y)	rs1065410	snp	N	1	110230839	A // B	C // T	N/A	+	+	GSTM1	PA182	NM_000561.3|NP_000552.2|T|Y|28|coding-synonymous|C|Y|28	CAGCTGGCCCACGCCATCCGCCTGCTCCTGGAATACACAGACTCAAGCTA[C/T]GAGGAAAAGAAGTACACGATGGGGGACGGTAATGGCACCCTCGTGTTCGG
777	AM_11705	GSTM1_c.178-78T>C	rs737497	snp	N	1	110231592	A // B	T // C	N/A	+	+	GSTM1	PA182	NM_000561.3|NP_000552.2||||intron|||	CAGTTGGGCCACCAGGCTCCCCAGCATCCCCTTCCCATAAGCAAGAGCAG[A/G]GAGGAGACCGGGCACTCACTGTGCCTGCTCATGGCAGGACTGAAATAAGA
778	AM_11707	GSTM1*B_c.519G>C(K173N)	rs74837985	snp	Y	1	110233138	A // B	C // G	N/A	+	+	GSTM1	PA182	NM_000561.3|NP_000552.2|G|K|173|coding-nonsynonymous|C|N|173	GATTTTCTCGTCTATGATGTCCTTGACCTCCACCGTATATTTGAGCCCAA[C/G]TGCTTGGACGCCTTCCCAAATCTGAAGGACTTCATCTCCCGCTTTGAGGT
779	AM_11710	GSTM5_c.-524C>T	rs1296954	snp	N	1	110254411	A // B	T // C	N/A	+	+	GSTM5	PA29027	NM_000851.3|NP_000842.2||||locus-region|||	GGTGGTCCCAACCTGGGAATTTAATTCAGCCCCTGTCACTGTAAGAGCAG[A/G]ACTTCCTCTGATCCGAAAGCTACTCCGAGGGCTTAGTCTCCCCTCTAGCC
780	AM_11719	GSTM5_c.178-31A>G	rs2479390	snp	N	1	110256075	A // B	A // G	N/A	+	+	GSTM5	PA29027	NM_000851.3|NP_000842.2||||intron|||	CTCTCTGCCCTTGCATATGGGAAGGGGATGCTGGGGAGCCTGGTGGCCCA[A/G]CTGAGCTTCCCCGGTTTCCCATCTATCCAGCTGCCCTACTTGATTGATGG
781	AM_11720	GSTM5_c.382T>C(L128L)	rs2229059	snp	N	1	110257590	A // B	C // T	N/A	+	+	GSTM5	PA29027	NM_000851.3|NP_000842.2|T|L|128|coding-synonymous|C|L|128	AGGGTGGTGACAGCTGTTTTCTGCCTCAGGAGAAACTGAAGCCAAAATAC[C/T]TGGAGGAACTCCCTGAAAAGCTAAAGCTCTACTCAGAGTTTCTGGGGAAG
782	AM_11723	GSTM5_c.*462G>C	rs1049741	snp	N	1	110260510	A // B	G // C	N/A	+	+	GSTM5	PA29027	NM_000851.3|||||mrna-utr|||	TAAGCTCTGGCTGTGGACAACAGAAGACAAAAAACCACCCACAATTCGAG[C/G]ACAGTCCTGAGTCAAGGGAGCCTCAGGGAATAAGACAAGACATGGCAGGC
783	AM_11724	GSTM5_c.*694T>C	rs11807	snp	N	1	110260742	A // B	T // C	N/A	+	+	GSTM5	PA29027	NM_000851.3|||||mrna-utr|||	CTGGGAGCTGCTCAGCCCCCTTCCCCATCAGCCTAGCCCCTCTTTGAACC[A/G]TGCCAGTTCTAGACGGCCTACAGGAGCGCGAATGAGTGAGGAACTTGGCA
784	AM_11728	GSTM3_c.*91A>C>G	rs2234696	snp	N	1	110279602	A // B // C	A // C // G	N/A	-	-	GSTM3	PA29024	NM_000849.4|||||mrna-utr|||	TCCGTAAGGGGTCAGCGCTCTTGCTTTGCTCTTTTCAATGAATAGCACTT[A/C/G]TGTTACTGGTGTCCAGCTGAGTTTCTCTTGGGTATAAAGGCTAAAAGGGA
785	AM_11729	GSTM3_c.*30G>T	rs1803688	snp	N	1	110279663	A // B	G // T	N/A	-	-	GSTM3	PA29024	NM_000849.4|||||mrna-utr|||	GGCAACAAGCCTGTATGCTGAGCAGGAGGCAGACTTGCAGAGCTTGTTTT[G/T]TTTCATCCTGTCCGTAAGGGGTCAGCGCTCTTGCTTTGCTCTTTTCAATG
786	AM_11730	GSTM3_c.670G>A(V224I)	rs7483	snp	N	1	110279701	A // B	A // G	N/A	-	-	GSTM3	PA29024	NM_000849.4|NP_000840.2|G|V|224|coding-nonsynonymous|A|I|224	TCTGCAAGATGCCCATCAACAACAAGATGGCCCAGTGGGGCAACAAGCCT[A/G]TATGCTGAGCAGGAGGCAGACTTGCAGAGCTTGTTTTGTTTCATCCTGTC
787	AM_11734	GSTM3_c.468+24_26delAGG	rs1799735	in-del	N	1	110280254	A // B	- // AGG	N/A	-	-	GSTM3	PA29024	NM_000849.4|NP_000840.2||||intron|||	GGAAATTCTCATGGTTTGCCGGGGAAAAGGTAGGAAGAAGGGAAAAGAAG[-/AGG]ATACTTCTCTATCTCTGCAGGCTACTACTCCTCAGACCTAAGCATCTTAT
788	AM_11735	GSTM3_c.384G>C(K128N)	rs1803687	snp	N	1	110280362	A // B	G // C	N/A	-	-	GSTM3	PA29024	NM_000849.4|NP_000840.2|G|K|128|coding-nonsynonymous|C|N|128	AACATGGAGAATTGTTTCAGTTGTCCAGGTAGCTCTTCCAAGTACTGAGG[C/G]TTCAGTTTTTCCTGAGAGGAAAAAACAGAATGAGAATAGTGGTGATCATC
789	AM_11736	GSTM3_c.19A>C(M7L)	rs67174253	snp	N	1	110282891	A // B	C // A	N/A	-	-	GSTM3	PA29024	NM_000849.4|NP_000840.2|A|M|7|coding-nonsynonymous|C|L|7	TACCGTTGAGACGGCACTCACCCCACGAATATCCCAGTACCCGAGAACCA[G/T]AGACGACTCGCACGACATGGTGACGGGCTTCCGAGCCTTCGAGGACTAGG
790	AM_11738	GSTM3_c.-160G>T	rs4646412	snp	N	1	110283069	A // B	G // T	N/A	-	-	GSTM3	PA29024	NM_000849.4|NP_000840.2||||locus-region|||	TCCCGCCTCGGGGTCGCCAGGCCCTGAACCCCAACGCCGGCATTAGTCGC[G/T]CCTGCGCACGGCCCTGTGGAGCCGCGGAGGCAAGGGACGGAGAACGGGGC
791	AM_11739	SLC16A1_C>A(rs12727968)	rs12727968	snp	N	1	113452284	A // B	C // A	N/A	-	-	SLC16A1	PA35813	NM_003051.3||||||||	ATTTAATTGTTTAGCTAATATTCTTAAGAGTCACTCCAAAACCATCCACT[G/T]CAAGTAAGAGTCCACTTCAGGAATTCTCATAGCCTTTTTACCCCTAAGCA
792	AM_11740	SLC16A1_c.*1942T>C	rs9429505	snp	N	1	113454571	A // B	T // C	N/A	-	-	SLC16A1	PA35813	NM_003051.3|NP_003042.3||||locus-region|||	ATTCCCTCACCAACAGTAATCCTCATTTTTATAGAAGGTAAGAGAGAAGA[A/G]GTACGCAGAGGTTACAGACTTGGGTCCAAAGAAAATTACAGAGTCCAAAC
793	AM_11741	SLC16A1_c.*1876G>C	rs11811205	snp	N	1	113454637	A // B	G // C	N/A	-	-	SLC16A1	PA35813	NM_003051.3|NP_003042.3||||locus-region|||	AGACTTGGGTCCAAAGAAAATTACAGAGTCCAAACTGAGGCCAAGCCTGC[C/G]AATACTCTCAGCAGCAGTTTTCTCCTCTAACACTCTTCCTCTATCTGCCA
794	AM_11742	SLC16A1_c.*1414T>C	rs7169	snp	N	1	113455099	A // B	C // T	N/A	-	-	SLC16A1	PA35813	NM_003051.3|||||mrna-utr|||	CTGTAAATATTTTTTTAACCTAATATCACTTAAATCGAGGCAGAAAGATA[C/T]AGACATTCAATGAATTATATTCAATGCATTTAAAATACCACTGTAATTGA
795	AM_11743	SLC16A1_c.*145T>G	rs11585690	snp	N	1	113456368	A // B	T // G	N/A	-	-	SLC16A1	PA35813	NM_003051.3|||||mrna-utr|||	TACCAATCATTCCCTCCTCAAATTCAGGCTATTGGTAAGGAGTCAAACAA[A/C]AATCCCATCAATGAACAACTGGTATGATTTCCACACAAATGTCTACTATT
796	AM_11744	SLC16A1_c.1470A>T(E490D)	rs1049434	snp	N	1	113456546	A // B	A // T	N/A	-	-	SLC16A1	PA35813	NM_003051.3|NP_003042.3|A|E|490|coding-nonsynonymous|T|D|490	CCAAATGAAGTTACCAAAGCAGCAGAATCTCCGGACCAGAAAGACACAGA[A/T]GGAGGGCCCAAGGAGGAGGAAAGTCCAGTCTGAATCCATGGGGCTGAAGG
797	AM_11745	SLC16A1_c.1229-1429C>T	rs12090418	snp	N	1	113458216	A // B	C // T	N/A	-	-	SLC16A1	PA35813	NM_003051.3|NP_003042.3||||intron|||	CTAACTGTAACCTCCTAACTGGTCTACCTGTATCAGTTCTAGCTGTTCTT[C/T]AGTCTCCTTGAAGTCTCCAGTTCAGAACTCTTCAAGATTTCTTAAAACTC
798	AM_11756	FMO5_c.1370C>T(P457L)	rs72549314	snp	N	1	146658711	A // B	T // C	N/A	-	-	FMO5	PA28189	NM_001461.2|NP_001452.2|C|P|457|coding-nonsynonymous|T|L|457	GATAGTGGATTGGAGTGCAGGGTCCCAGTAATAAGTGTAATGCCAGCTTG[A/G]GGTCAGTGAAGGCCAGAGACAGCAGATTGGGCCTGACCCCCACCAAATCA
799	AM_11758	FMO5_c.1051T>C(S351P)	rs1044848	snp	N	1	146672866	A // B	T // C	N/A	-	-	FMO5	PA28189	NM_001461.2|NP_001452.2|T|S|351|coding-nonsynonymous|C|P|351	TGCAAGAGTTGGCCTTTCCAGGTTAGGAGGGAAGACCTTTTTATACAGGG[A/G]TATCTTGTTTTTGACCACTTTGACGGAATCTTCCAGAAACGGAAAGTCAA
800	AM_11759	FMO5_c.1011A>G(P337P)	rs894469	snp	N	1	146672906	A // B	A // G	N/A	-	-	FMO5	PA28189	NM_001461.2|NP_001452.2|A|P|337|coding-synonymous|G|P|337	GATGACATTGATGCTGTTATCTTTGCCACAGGCTATAGCTTTGACTTTCC[A/G]TTTCTGGAAGATTCCGTCAAAGTGGTCAAAAACAAGATATCCCTGTATAA
801	AM_11765	FMO5_20258T>A	N/A	snp	N	1	146676364	A // B	A // T	N/A	-	-	FMO5	PA28189	NM_001461.2|NP_001452.2||||intron|||	CAAGCTTGCAAGGAGCTTGCCCAAACCACTCGTACAGCATATGGACGAAA[A/T]GGAATGAAAAAAATGGTTATCAACTACTTGGAGAAGTTGTTTGTGACAAA
802	AM_11766	FMO5_20238C>T	N/A	snp	N	1	146676384	A // B	C // T	N/A	-	-	FMO5	PA28189	NM_001461.2|NP_001452.2||||intron|||	AGGCTGTGTATAGAAACATACAAGCTTGCAAGGAGCTTGCCCAAACCACT[C/T]GTACAGCATATGGACGAAATGGAATGAAAAAAATGGTTATCAACTACTTG
803	AM_11773	FMO5_c.773delA(E258X)	rs72549315	in-del	N	1	146680471	A // B	- // A	N/A	-	-	FMO5	PA28189	NM_001461.2|NP_001452.2|A|E|258|coding-nonsynonymous|-|X|258	ACATTTTATATGGAAGATCTGTGGCCAATCATTAGCAAACAAATATTTGG[-/A]AAAAAAGATAAACCAAAGGTTTGACCATGAAATGTTTGGCCTGAAGCCTA
804	AM_11774	FMO5_c.607_608insT(E203X)	rs72549316	in-del	N	1	146683983	A // B	- // T	N/A	-	-	FMO5	PA28189	NM_001461.2|NP_001452.2|-|E|203|coding-nonsynonymous|T|X|203	CGTAAATAATAATTGAGTGATTCAAACCTGCTTGGCTGTTTGGCTAATCT[-/A]CTACAGCCAGATCCCCTCCAGAATTCCCAATGCCAATTATAATGACTCTCT
805	AM_11793	ARNT_c.1289G>A(R430Q)	rs2229175	snp	N	1	150795775	A // B	G // A	N/A	-	-	ARNT	PA24994	NM_001668.2|NP_001659.1|G|R|430|coding-nonsynonymous|A|Q|430	GGAAAGTAAAGGAGCTGGTTCTCATCCAGAGCCATTCTTGGTTCTTAGAC[C/T]GGAACCGGAACATGACAGACAGCACTTGGCCTTTTAATTTCACTACCTGA
806	AM_11794	ARNT_c.1243-19G>T	rs72549317	snp	N	1	150795840	A // B	T // G	N/A	-	-	ARNT	PA24994	NM_001668.2|NP_001659.1||||intron|||	ACAGACAGCACTTGGCCTTTTAATTTCACTACCTGAAAAAGTTTTCATGC[A/C]ATCAGTGGAACTCATAGAAAATTTTCATTACAAAAATAAATAAAAATTTT
807	AM_11804	ARNT_c.567G>C(V189V)	rs2228099	snp	N	1	150808889	A // B	C // G	N/A	-	-	ARNT	PA24994	NM_001668.2|NP_001659.1|G|V|189|coding-synonymous|C|V|189	GATGGCTTTCTGTTTATTGTCTCATGTGAGACAGGCAGGGTGGTGTATGT[C/G]TCTGACTCCGTGACTCCTGTTTTGAACCAGCCACAGTCTGAATGGTTTGG
808	AM_11805	ARNT_c.354C>A(T118T)	rs17855058	snp	N	1	150812049	A // B	A // C	N/A	-	-	ARNT	PA24994	NM_001668.2|NP_001659.1|C|T|118|coding-synonymous|A|T|118	CGGAACAAGATGACAGCCTACATCACAGAACTGTCAGATATGGTACCCAC[A/C]TGTAGTGCCCTGGCTCGAAAACCAGACAAGCTAACCATCTTACGCATGGC
809	AM_11806	ARNT_c.270C>A(A90A)	rs17855059	snp	N	1	150814902	A // B	C // A	N/A	-	-	ARNT	PA24994	NM_001668.2|NP_001659.1|C|A|90|coding-synonymous|A|A|90	AAAGCAGCATCATCTGCTTCATCATGCTAAAAGACACTGTTCTCCTACCT[G/T]GCAAGTCTCTCTTTATCCGCAGAGCTCTGCTCATCATCCGACCTAAAAAT
810	AM_11807	ARNT_c.249T>C(S83S)	rs10305678	snp	N	1	150814923	A // B	C // T	N/A	-	-	ARNT	PA24994	NM_001668.2|NP_001659.1|T|S|83|coding-synonymous|C|S|83	TTAGCTTAGTTCATTAATTCTATTTTTAGGTCGGATGATGAGCAGAGCTC[C/T]GCGGATAAAGAGAGACTTGCCAGGTAGGAGAACAGTGTCTTTTAGCATGA
811	AM_11808	ARNT_c.-60G>T	rs10305649	snp	N	1	150849103	A // B	G // T	N/A	-	-	ARNT	PA24994	NM_001668.2|||||mrna-utr|||	AGGCGCCGCTTCTGGGGAGTGGCCTTTCTTTTCCCCTCCCTCCCGGTTCG[G/T]TGGCGGCGGCTCCTCCCACTGGGGGGGGGGGTGGCGCGGCGGCGGTGGCA
812	AM_11809	APOA2_c.185+197G>C	rs5085	snp	N	1	161192511	A // B	C // G	N/A	-	-	APOA2	PA391	NM_001643.1|NP_001634.1||||intron|||	AAGATCCCACACGTCTCTTAGATAGAGAGGAACAGCAAGAACTGGGCCTT[C/G]AATTTCAGTCTCTAGAGTCTGTCCCTCTACCTAGCAAAGGTCTTGACTCT
813	AM_11832	NR1I3_G>A(rs72549318)	rs72549318	snp	N	1	161212063	A // B	G // A	N/A	-	-	NR1I3	PA391	||||||||	AGGCCAGGGTCTGAAAAACACCTGTGAGGATTGTGACCTGATGGGTTAAG[C/T]TCTCTGAATTTCAGTTTTCTCACCTGGAAAAAAAAAGGGTTAAAACACTC
814	AM_11833	NR1I3_G>A(rs11584174)	rs11584174	snp	N	1	161212453	A // B	A // G	N/A	-	-	NR1I3	PA391	||||||||	TAGAAATAGCAACAGCATGGAGGATGGGTTGGAAGGAGATGAGGCTGGGA[A/G]CAGGGAGAATAATTGAATAGTCTACTGCAGCAGTAAGTGAAAAATGATGA
815	AM_11834	NR1I3_C>T(rs2501870)	rs2501870	snp	N	1	161212569	A // B	C // T	N/A	-	-	NR1I3	PA391	||||||||	GCCAGATCACAAAGGACTTTGTGTGACATGCTAAAGAGATTGGATTTTAT[C/T]GTGAAGGTGATGGAAAGCAAATGAAGAATTTTAAGCAGAGGAGAGACATG
816	AM_11835	NR1I3_G>A(rs55802895)	rs55802895	snp	N	1	161212743	A // B	G // A	N/A	-	-	NR1I3	PA391	||||||||	CTCTAGATGTGCTTAGGCATTTAGAGTTCCCTGAACAAGCTGTGCTCACT[C/T]ACCTCTGAACAACTGCCCTTGTTGTTCCCTCTGGTTGGAATCACGTCACA
817	AM_11836	NR1I3_T>A(rs72549319)	rs72549319	snp	N	1	161212956	A // B	T // A	N/A	-	-	NR1I3	PA391	||||||||	ATTTGTGACAGCACTTATCACATTGCAGAACAACTGACTGTTTCTTTTTG[A/T]CTCTATCAATCAACTGTGAGTTGATGAAGTCAAGGGCTGCACCTGTCATT
818	AM_11837	NR1I3_C>A(rs11265572)	rs11265572	snp	N	1	161213063	A // B	C // A	N/A	-	-	NR1I3	PA391	||||||||	TCCTTAGGGTCTTATGTACTCCAAGCATATATAATAAATATTTATGGAAT[G/T]AATAAATGGACTAGGATACAAATTAAGATCTGATTTCAAACCCGTGCTCT
819	AM_11857	FMO3_c.94G>A(E32K)	rs72549320	snp	N	1	171061893	A // B	G // A	N/A	+	+	FMO3	PA166	NM_001002294.2|NP_001002294.1|G|E|32|coding-nonsynonymous|A|K|32	CATGCTACTCACTGAAAATTTCCACAGGCCCCCAATGTCATTGCTCTTCT[C/T]AAAGCAGGTGGGCTCCAGCCCCTCTTCCAGACAGCTCCTGATGGAGGCCA
820	AM_11866	FMO3_c.154G>A(A52T)	rs72549321	snp	N	1	171072947	A // B	A // G	N/A	+	+	FMO3	PA166	NM_001002294.2|NP_001002294.1|G|A|52|coding-nonsynonymous|A|T|52	CGCTTCCATTTGATACTATACATTCACAGGACCATGCAGAGGAGGGCAGG[A/G]CTAGCATTTACAAATCAGTCTTTTCCAACTCTTCCAAAGAGATGATGTGT
821	AM_11867	FMO3_c.182A>G(N61S)	rs72549322	snp	N	1	171072975	A // B	A // G	N/A	+	+	FMO3	PA166	NM_001002294.2|NP_001002294.1|A|N|61|coding-nonsynonymous|G|S|61	GGACCATGCAGAGGAGGGCAGGGCTAGCATTTACAAATCAGTCTTTTCCA[A/G]CTCTTCCAAAGAGATGATGTGTTTCCCAGACTTCCCATTTCCCGATGACT
822	AM_11868	FMO3_c.198G>T(M66I)	rs72549323	snp	N	1	171072991	A // B	G // T	N/A	+	+	FMO3	PA166	NM_001002294.2|NP_001002294.1|G|M|66|coding-nonsynonymous|T|I|66	GGCAGGGCTAGCATTTACAAATCAGTCTTTTCCAACTCTTCCAAAGAGAT[G/T]ATGTGTTTCCCAGACTTCCCATTTCCCGATGACTTCCCCAACTTTATGCA
823	AM_11869	FMO3_c.245T>C(M82T)	rs72549324	snp	N	1	171073038	A // B	C // T	N/A	+	+	FMO3	PA166	NM_001002294.2|NP_001002294.1|T|M|82|coding-nonsynonymous|C|T|82	GATGATGTGTTTCCCAGACTTCCCATTTCCCGATGACTTCCCCAACTTTA[C/T]GCACAACAGCAAGATCCAGGAATATATCATTGCATTTGCCAAAGAAAAGA
824	AM_11871	FMO3_c.394G>C(D132H)	rs12072582	snp	N	1	171076888	A // B	C // G	N/A	+	+	FMO3	PA166	NM_001002294.2|NP_001002294.1|G|D|132|coding-nonsynonymous|C|H|132	AACATCCTGATTTTGCAACTACTGGCCAGTGGGATGTTACCACTGAAAGG[C/G]ATGGTAAAAAAGAATCGGCTGTCTTTGATGCTGTAATGGTTTGTTCCGGA
825	AM_11872	FMO3_c.441C>T(S147S)	rs1800822	snp	N	1	171076935	A // B	C // T	N/A	+	+	FMO3	PA166	NM_001002294.2|NP_001002294.1|C|S|147|coding-synonymous|T|S|147	AGGGATGGTAAAAAAGAATCGGCTGTCTTTGATGCTGTAATGGTTTGTTC[C/T]GGACATCATGTGTATCCCAACCTACCAAAAGAGTCCTTTCCAGGTAAGGC
826	AM_11873	FMO3_c.442G>T(G148X)	rs72549325	snp	N	1	171076936	A // B	T // G	N/A	+	+	FMO3	PA166	NM_001002294.2|NP_001002294.1|G|G|148|coding-nonsynonymous|T|X|148	GGCCTTACCTGGAAAGGACTCTTTTGGTAGGTTGGGATACACATGATGTC[A/C]GGAACAAACCATTACAGCATCAAAGACAGCCGATTCTTTTTTACCATCCC
827	AM_11874	FMO3_c.458C>T(P153L)	rs72549326	snp	N	1	171076952	A // B	C // T	N/A	+	+	FMO3	PA166	NM_001002294.2|NP_001002294.1|C|P|153|coding-nonsynonymous|T|L|153	ATCGGCTGTCTTTGATGCTGTAATGGTTTGTTCCGGACATCATGTGTATC[C/T]CAACCTACCAAAAGAGTCCTTTCCAGGTAAGGCCAAAATTTAAGCTGCTA
828	AM_11875	FMO3_c.472G>A(E158K)	rs2266782	snp	N	1	171076966	A // B	A // G	N/A	+	+	FMO3	PA166	NM_001002294.2|NP_001002294.1|G|E|158|coding-nonsynonymous|A|K|158	ATGCTGTAATGGTTTGTTCCGGACATCATGTGTATCCCAACCTACCAAAA[A/G]AGTCCTTTCCAGGTAAGGCCAAAATTTAAGCTGCTAGCCACATAACTGAC
829	AM_11877	FMO3_c.596T>A(I199N)	rs72549327	snp	N	1	171077331	A // B	A // T	N/A	+	+	FMO3	PA166	NM_001002294.2|NP_001002294.1|T|I|199|coding-nonsynonymous|A|N|199	CAATGGAAAGCGTGTCCTGGTGGTTGGCCTGGGGAATTCGGGCTGTGATA[A/T]TGCCACAGAACTCAGCCGCACAGCAGAACAGGTACTACTCCCCGGGTACT
830	AM_11878	FMO3_c.604_605insT(E202X)	rs72549328	in-del	N	1	171077339	A // B	- // T	N/A	+	+	FMO3	PA166	NM_001002294.2|NP_001002294.1|-|-|202|coding-nonsynonymous|GA|E|202	AGTCACCCGAGTACCCGGGGAGTAGTACCTGTTCTGCTGTGCGGCTGAGTT[-/A]CTGTGGCAATATCACAGCCCGAATTCCCCAGGCCAACCACCAGGACACGC
831	AM_11880	FMO3_c.627+10C>G	rs2066534	snp	N	1	171077372	A // B	C // G	N/A	+	+	FMO3	PA166	NM_001002294.2|NP_001002294.1||||intron|||	GCTGTGATATTGCCACAGAACTCAGCCGCACAGCAGAACAGGTACTACTC[C/G]CCGGGTACTCGGGTGACTCTCGTTACTGACAGAAGAGTTATTATCGTTTG
832	AM_11884	FMO3_c.717T>C(F239F)	rs1050902	snp	N	1	171080028	A // B	C // T	N/A	+	+	FMO3	PA166	NM_001002294.2|NP_001002294.1|T|F|239|coding-synonymous|C|F|239	CGGGTCTGGGACAATGGTTATCCTTGGGACATGCTGCTCGTCACTCGATT[C/T]GGAACCTTCCTCAAGAACAATTTACCGACAGCCATCTCTGACTGGTTGTA
833	AM_11885	FMO3_c.769G>A(V257M)	rs1736557	snp	N	1	171080080	A // B	A // G	N/A	+	+	FMO3	PA166	NM_001002294.2|NP_001002294.1|G|V|257|coding-nonsynonymous|A|M|257	GAACCTTCCTCAAGAACAATTTACCGACAGCCATCTCTGACTGGTTGTAC[A/G]TGAAGCAGATGAATGCAAGATTCAAGCATGAAAACTATGGCTTGATGCCT
834	AM_11887	FMO3_c.830T>C(V277A)	rs2066530	snp	N	1	171083149	A // B	T // C	N/A	+	+	FMO3	PA166	NM_001002294.2|NP_001002294.1|T|V|277|coding-nonsynonymous|C|A|277	ACAGAATGCTTGCTGGGAGCTCATCGTTAAATACAGGCTCTTTCCTCAGG[A/G]CTCTGTATGGAAAACAGAGACAATTATTGGAAGTGTAATATTTCCCTCTT
835	AM_11888	FMO3_c.855C>T(N285N)	rs909530	snp	N	1	171083174	A // B	C // T	N/A	+	+	FMO3	PA166	NM_001002294.2|NP_001002294.1|C|N|285|coding-synonymous|T|N|285	AATTGTCTCTGTTTTCCATACAGAGTCCTGAGGAAAGAGCCTGTATTTAA[C/T]GATGAGCTCCCAGCAAGCATTCTGTGTGGCATTGTGTCCGTAAAGCCTAA
836	AM_11889	FMO3_c.906C>T(N302N)	rs2066536	snp	N	1	171083225	A // B	C // T	N/A	+	+	FMO3	PA166	NM_001002294.2|NP_001002294.1|C|N|302|coding-synonymous|T|N|302	GATGAGCTCCCAGCAAGCATTCTGTGTGGCATTGTGTCCGTAAAGCCTAA[C/T]GTGAAGGAATTCACAGAGACCTCGGCCATTTTTGAGGATGGGACCATATT
837	AM_11890	FMO3_c.913G>T(E305X)	rs61753344	snp	N	1	171083232	A // B	G // T	N/A	+	+	FMO3	PA166	NM_001002294.2|NP_001002294.1|G|E|305|coding-nonsynonymous|T|X|305	TCCCAGCAAGCATTCTGTGTGGCATTGTGTCCGTAAAGCCTAACGTGAAG[G/T]AATTCACAGAGACCTCGGCCATTTTTGAGGATGGGACCATATTTGAGGGC
838	AM_11891	FMO3_c.923A>G(E308G)	rs2266780	snp	N	1	171083242	A // B	A // G	N/A	+	+	FMO3	PA166	NM_001002294.2|NP_001002294.1|A|E|308|coding-nonsynonymous|G|G|308	CATTCTGTGTGGCATTGTGTCCGTAAAGCCTAACGTGAAGGAATTCACAG[A/G]GACCTCGGCCATTTTTGAGGATGGGACCATATTTGAGGGCATTGACTGTG
839	AM_11892	FMO3_c.940G>T(E314X)	rs72549330	snp	N	1	171083259	A // B	G // T	N/A	+	+	FMO3	PA166	NM_001002294.2|NP_001002294.1|G|E|314|coding-nonsynonymous|T|X|314	TGTCCGTAAAGCCTAACGTGAAGGAATTCACAGAGACCTCGGCCATTTTT[G/T]AGGATGGGACCATATTTGAGGGCATTGACTGTGTAATCTTTGCAACAGGG
840	AM_11893	FMO3_c.1079T>C(L360P)	rs28363581	snp	N	1	171083398	A // B	C // T	N/A	+	+	FMO3	PA166	NM_001002294.2|NP_001002294.1|T|L|360|coding-nonsynonymous|C|P|360	CAAAAGCAGAAACAATGAGATCATTTTATTTAAAGGAGTATTTCCTCCTC[C/T]ACTTGAGAAGTCAACCATAGCAGTGATTGGCTTTGTCCAGTCCCTTGGGG
841	AM_11894	FMO3_c.1084G>C(E362Q)	rs2066532	snp	N	1	171083403	A // B	C // G	N/A	+	+	FMO3	PA166	NM_001002294.2|NP_001002294.1|G|E|362|coding-nonsynonymous|C|Q|362	GCAGAAACAATGAGATCATTTTATTTAAAGGAGTATTTCCTCCTCTACTT[C/G]AGAAGTCAACCATAGCAGTGATTGGCTTTGTCCAGTCCCTTGGGGCTGCC
842	AM_11895	FMO3_c.1160G>T(R387L)	rs72549331	snp	N	1	171083479	A // B	G // T	N/A	+	+	FMO3	PA166	NM_001002294.2|NP_001002294.1|G|R|387|coding-nonsynonymous|T|L|387	CTTTGTCCAGTCCCTTGGGGCTGCCATTCCCACAGTTGACCTCCAGTCCC[G/T]CTGGGCAGCACAAGTAATAAAGGGTAAGTCAATAAAGAGGCTCATGGATT
843	AM_11902	FMO3_c.1458A>G(I486M)	rs1050906	snp	N	1	171086441	A // B	A // G	N/A	+	+	FMO3	PA166	NM_001002294.2|NP_001002294.1|A|I|486|coding-nonsynonymous|G|M|486	CAGTTTAGGCTGGTGGGCCCAGGGCAGTGGCCAGGAGCCAGAAATGCCAT[A/G]CTGACCCAGTGGGACCGGTCGTTGAAACCCATGCAGACACGAGTGGTCGG
844	AM_11903	FMO3_c.1474C>T(R492W)	rs72549334	snp	N	1	171086457	A // B	C // T	N/A	+	+	FMO3	PA166	NM_001002294.2|NP_001002294.1|C|R|492|coding-nonsynonymous|T|W|492	GCCCAGGGCAGTGGCCAGGAGCCAGAAATGCCATACTGACCCAGTGGGAC[C/T]GGTCGTTGAAACCCATGCAGACACGAGTGGTCGGGAGACTTCAGAAGCCT
845	AM_11905	FMO3_c.1507G>A(G503R)	rs72549335	snp	N	1	171086490	A // B	G // A	N/A	+	+	FMO3	PA166	NM_001002294.2|NP_001002294.1|G|G|503|coding-nonsynonymous|A|R|503	TGCAAAGAGCTTCAGCCAATGGAAAAAGAAGCAAGGCTTCTGAAGTCTCC[C/T]GACCACTCGTGTCTGCATGGGTTTCAACGACCGGTCCCACTGGGTCAGTA
846	AM_11912	FMO6_906-3127T>C	rs1736565	snp	N	1	171112490	A // B	C // T	N/A	N/A	N/A	FMO6	PA142671753	||||||||	AGGAATATATAAAGACATATGCTCAAAAGAAGGATCTTTTAAGATACATA[C/T]AGTTTGAGGTAGGGGTCTCATAACTTGTACTGTTGAAATTAAGATATGTG
847	AM_11913	FMO6_1232G>A	rs2272797	snp	N	1	171118840	A // B	A // G	N/A	N/A	N/A	FMO6	PA142671753	||||||||	CATCCTTTCTCCGGAATGTCCTTCCTTCATTCATCTCTGACTGGTTATAT[A/G]TCCAGAAGATGAACACGTGGTTTAAGCATGAGAACTATGGCCTGATGCCT
848	AM_11914	FMO6_1415A>G	rs7889839	snp	N	1	171121173	A // B	A // G	N/A	N/A	N/A	FMO6	PA142671753	||||||||	CCAGTGTGAAGGAGTTCACGGAAACCTCAGCTGTGTTTGAGGATGGGACC[A/G]TGTTTGAGGCTATCGACTCTGTCATCTTTGCAACAGGCTATGATTATTCC
849	AM_11915	FMO6_1510G>A	rs7886938	snp	N	1	171121268	A // B	A // G	N/A	N/A	N/A	FMO6	PA142671753	||||||||	TATTCCTACCCCTTCCTTGATGAGACCATCATGAAAAGCAGAAACAATGA[A/G]GTTACCTTGTTTAAAGGCATCTTCCCCCCACTAATGGAGAAGCCAACCTT
850	AM_11925	FMO2_c.107A>G(D36G)	rs2020870	snp	N	1	171154959	A // B	A // G	N/A	+	+	FMO2	PA28187	NM_001460.2|NP_001451.1|A|D|36|coding-nonsynonymous|G|G|36	GTGCTGTGTGGATGAGGGACTTGAGCCCACTTGCTTTGAGAGAACTGAAG[A/G]TATTGGAGGAGTGTGGAGGTTCAAAGTAAGTGAGATTTTCTTGGGTCTTG
851	AM_11927	FMO2_c.175G>A(V59I)	rs55708639	snp	N	1	171162516	A // B	A // G	N/A	+	+	FMO2	PA28187	NM_001460.2|NP_001451.1|G|V|59||||59	TCCTTCAGGAGAATGTGGAAGATGGCCGAGCAAGTATCTATCAATCTGTC[A/G]TTACCAACACCAGCAAAGAAATGTCCTGTTTCAGTGACTTTCCAATGCCT
852	AM_11929	FMO2_c.210_211insGAC(70InsD)	rs2020868	in-del	N	1	171162551	A // B	- // GAC	N/A	+	+	FMO2	PA28187	NM_001460.2|NP_001451.1|-|-|70|coding-nonsynonymous|GAC|RT|70	TCTATCAATCTGTCGTTACCAACACCAGCAAAGAAATGTCCTGTTTCAGT[-/GAC]GACTTTCCAATGCCTGAAGATTTTCCAAACTTCCTGCATAATTCTAAACTT
853	AM_11931	FMO2_c.242T>C(F81S)	rs2020860	snp	N	1	171162583	A // B	C // T	N/A	+	+	FMO2	PA28187	NM_001460.2|NP_001451.1|T|F|81|coding-nonsynonymous|C|S|81	AGAAATGTCCTGTTTCAGTGACTTTCCAATGCCTGAAGATTTTCCAAACT[C/T]CCTGCATAATTCTAAACTTCTGGAATATTTCAGGATTTTTGCTAAAAAAT
854	AM_11933	FMO2_c.337delG(V113X)	rs28369860	in-del	N	1	171165803	A // B	- // G	N/A	+	+	FMO2	PA28187	NM_001460.2|NP_001451.1|G|V|113|coding-nonsynonymous|-|X|113	AATTCTCAATGATGCCTTCTCTGTGTTTCTTCAAGACAACTGTCCTTAGT[-/G]TGAGAAAATGTCCAGATTTCTCATCCTCTGGCCAATGGAAGGTTGTCACT
855	AM_11936	FMO2_c.545T>C(F182S)	rs2307492	snp	N	1	171168545	A // B	C // T	N/A	+	+	FMO2	PA28187	NM_001460.2|NP_001451.1|T|F|182|coding-nonsynonymous|C|S|182	GTTCAAAGGCCAATATTTCCATAGCCGCCAATACAAGCATCCAGATGGAT[C/T]TGAGGGAAAACGCATCCTGGTGATTGGAATGGGAAACTCAGGCTCAGATA
856	AM_11938	FMO2_c.585A>G(S195S)	rs2020861	snp	N	1	171168585	A // B	G // A	N/A	+	+	FMO2	PA28187	NM_001460.2|NP_001451.1|A|S|195|coding-synonymous|G|S|195	CATCACACCTGAGCAGCATTCTTACTCAGCTCAACAGCAATATCTGAGCC[C/T]GAGTTTCCCATTCCAATCACCAGGATGCGTTTTCCCTCAAATCCATCTGG
857	AM_11940	FMO2_c.713G>A(R238Q)	rs28369895	snp	N	1	171173089	A // B	G // A	N/A	+	+	FMO2	PA28187	NM_001460.2|NP_001451.1|G|R|238|coding-nonsynonymous|A|Q|238	TCCATTTTACAGCTGTTCGTGGCAGTACATTGCGGAGCATAGAACGAAAC[C/T]GGGTGTGGAACACTGAGTCCCAAGGATAGCCATCTTCAGAGATACGGCTC
858	AM_11941	FMO2_c.745C>T(R249X)	rs2020866	snp	N	1	171173121	A // B	C // T	N/A	+	+	FMO2	PA28187	NM_001460.2|NP_001451.1|C|R|249|coding-nonsynonymous|T|X|249	ACTCAGTGTTCCACACCCGGTTTCGTTCTATGCTCCGCAATGTACTGCCA[C/T]GAACAGCTGTAAAATGGATGATAGAACAACAGATGAATCGGTGGTTCAAC
859	AM_11942	FMO2_c.941A>G(E314G)	rs2020863	snp	N	1	171174531	A // B	A // G	N/A	+	+	FMO2	PA28187	NM_001460.2|NP_001451.1|A|E|314|coding-nonsynonymous|G|G|314	CAAGGTGAAATCTACAGTGAAAGAGCTCACAGAAACTTCTGCCATCTTTG[A/G]GGATGGAACAGTGGAGGAGAACATTGATGTCATCATTTTTGCAACAGGAT
860	AM_11943	FMO2_c.1101G>A(A367A)	rs7536646	snp	N	1	171174691	A // B	A // G	N/A	+	+	FMO2	PA28187	NM_001460.2|NP_001451.1|G|A|367|coding-synonymous|A|A|367	TCACTGTATAAATACATATTCCCCGCTCACCTGGACAAGTCAACCCTCGC[A/G]TGCATTGGTCTCATCCAGCCCCTAGGTTCCATTTTCCCAACTGCTGAACT
861	AM_11944	FMO2_c.1160_1161ins8(R387X)	rs72549336	in-del	N	1	171174750	A // B	- // TCAAGCTC	N/A	+	+	FMO2	PA28187	NM_001460.2|NP_001451.1|-|-|387|coding-nonsynonymous|GT|R|387	TTAGCCACTCACCTGCCTACACACTTACCTTTGAAAACTCTTGTCACCCAA[-/GAGCTTGA]CGAGCTTGAAGTTCAGCAGTTGGGAAAATGGAACCTAGGGGCTGGATGAG
862	AM_11945	FMO2_c.1172G>C(R391T)	rs28369899	snp	N	1	171174762	A // B	C // G	N/A	+	+	FMO2	PA28187	NM_001460.2|NP_001451.1|G|R|391|coding-nonsynonymous|C|T|391	CCTAGGTTCCATTTTCCCAACTGCTGAACTTCAAGCTCGTTGGGTGACAA[C/G]AGTTTTCAAAGGTAAGTGTGTAGGCAGGTGAGTGGCTAAGCGTTTCAGAT
863	AM_11947	FMO2_c.1206G>A(E402E)	rs6671692	snp	N	1	171176879	A // B	A // G	N/A	+	+	FMO2	PA28187	NM_001460.2|NP_001451.1|G|E|402|coding-synonymous|A|E|402	CTATTCAAACCAACCTTTTATTCCTTAGGCTTGTGTAGCCTGCCCTCAGA[A/G]AGAACTATGATGATGGACATTATCAAAAGGAATGAAAAAAGAATTGACCT
864	AM_11948	FMO2_c.1239T>G(N413K)	rs2020865	snp	N	1	171176912	A // B	T // G	N/A	+	+	FMO2	PA28187	NM_001460.2|NP_001451.1|T|N|413|coding-nonsynonymous|G|K|413	TGCTTCATGTAAAGAATTAAAAAAAATTCTTACAGGTCAATTCTTTTTTC[A/C]TTCCTTTTGATAATGTCCATCATCATAGTTCTCTCTGAGGGCAGGCTACA
865	AM_11958	FMO2_23238T>C(X472Q)	rs6661174	snp	N	1	171178090	A // B	C // T	N/A	+	+	FMO2	PA28187	NM_001460.2|NP_001451.1|T|X|472|coding-nonsynonymous|C|Q|472	AAGATCCTAAACTGGCTGTGAGACTCTATTTCGGACCCTGCAACTCCTAT[C/T]AGTATCGCCTGGTTGGGCCTGGGCAATGGGAAGGAGCCAGAAATGCCATC
866	AM_11959	FMO2_c.*60A>G	rs2020869	snp	N	1	171178152	A // B	A // G	N/A	+	+	FMO2	PA28187	NM_001460.2|||||mrna-utr|||	GTTGGGCCTGGGCAATGGGAAGGAGCCAGAAATGCCATCTTCACCCAGAA[A/G]CAAAGAATACTGAAGCCACTCAAGACTCGGGCCCTGAAGGATTCATCTAA
867	AM_11960	FMO2_c.*113_*114insT	rs72549337	in-del	N	1	171178205	A // B	- // T	N/A	+	+	FMO2	PA28187	NM_001460.2||||||||	AGAATACTGAAGCCACTCAAGACTCGGGCCCTGAAGGATTCATCTAATTT[-/T]CTCAGTTTCTTTTCTGTTGAAAATCCTGGGCCTTCTTGCTGTTGTTGTGGC
868	AM_11966	FMO2_c.*933T>C	rs6664553	snp	N	1	171179025	A // B	T // C	N/A	+	+	FMO2	PA28187	NM_001460.2|||||mrna-utr|||	TAGTTTCATCATCTGTGAAATGACTATAATAGCTGTAACCATTTCACAGA[A/G]TTGTTGTGAGAATTAAATGAAATAATACATATGATATGCACATAGCACAA
869	AM_11968	FMO2_c.*1195C>T	rs7512785	snp	N	1	171179287	A // B	C // T	N/A	+	+	FMO2	PA28187	NM_001460.2|||||mrna-utr|||	CATCTGCTACTTTGGGAGGCCCTTTACATAGAAAACAGCATTCTTTTTGC[C/T]AAATATGACCAAATTACTTTTATTTATAATTTTTGATTTATATTTCAGCT
870	AM_11970	FMO2_c.*1385C>T	rs7515157	snp	N	1	171179477	A // B	T // C	N/A	+	+	FMO2	PA28187	NM_001460.2|||||mrna-utr|||	TAGCTTTTTGCCTTAGTTATCTGTAAGACTGGAGTTAGATACAAGTGTCA[A/G]TCATTATAATGCTTTGCATCTACTTGAAAGATACACTTTTTTTCCTCAAT
871	AM_12009	FMO1_c.291C>G(H97Q)	rs56841822	snp	N	1	171236840	A // B	C // G	N/A	+	+	FMO1	PA165	NM_002021.1|NP_002012.1|C|H|97|coding-nonsynonymous|G|Q|97	TATGTGCCAAATTCTCAATTCCTGGAATATCTCAAAATGTATGCAAACCA[C/G]TTTGACCTTCTGAAACACATTCAATTCAAGGTAAGACACAAAACATCAGT
872	AM_12017	FMO1_c.747C>T(T249T)	rs742350	snp	N	1	171250044	A // B	T // C	N/A	+	+	FMO1	PA165	NM_002021.1|NP_002012.1|C|T|249|coding-synonymous|T|T|249	TGATTGAGCCAGTTGTTTATCTTTCGCTCCATCAACCAAGTCACAATTGG[A/G]GTTGGGAGGGAATTTCTCAACATGTTCTGAAAGCGTGTCATGAACACCAT
873	AM_12018	FMO1_c.907A>G(I303V)	rs16864314	snp	N	1	171251196	A // B	A // G	N/A	+	+	FMO1	PA165	NM_002021.1|NP_002012.1|A|I|303|coding-nonsynonymous|G|V|303	ATGAGCTCCCAGGACGCATCATCACTGGGAAAGTGTTCATCAGGCCAAGC[A/G]TAAAAGAGGTAAAGGAAAACTCTGTCATATTTAACAATACTTCAAAGGAA
874	AM_12023	FMO1_c.1188A>G(V396V)	rs1126692	snp	N	1	171252287	A // B	G // A	N/A	+	+	FMO1	PA165	NM_002021.1|NP_002012.1|A|V|396|coding-synonymous|G|V|396	TTCCTTGCATTAATTTCCTCTATCATGACACTTGGTGGTGGTAACTTATT[C/T]ACACCTGTAGGATTAAAATAAAAACCTCAAATGCAACTTAAGTTTAGGTC
875	AM_12027	FMO1_c.1504C>T(R502X)	rs60639054	snp	N	1	171254588	A // B	C // T	N/A	+	+	FMO1	PA165	NM_002021.1|NP_002012.1|C|R|502|coding-nonsynonymous|T|X|502	GAAATGCCATCATGACCCAGTGGGACCGAACATTCAAGGTCATCAAAGCT[C/T]GAGTTGTACAAGAGTCTCCATCTCCCTTTGAAAGTTTTCTTAAAGTCTTT
876	AM_12028	FMO1_c.*111C>T	rs12954	snp	N	1	171254794	A // B	T // C	N/A	+	+	FMO1	PA165	NM_002021.1|||||mrna-utr|||	TCAGGAATACCAGTGGTAGCCCTGGGGCCAGCCAGGGAAGCGAGAGGGTG[A/G]CCTTTACTATTTGAATACAGTTTATAACTGTGAAGGCAATATTGCTGTAA
877	AM_12031	FMO1_c.*207C>T	rs7877	snp	N	1	171254890	A // B	T // C	N/A	+	+	FMO1	PA165	NM_002021.1|||||mrna-utr|||	TCTTTCTAAAATGAACCTGTAACTTTCCAACAACCTTCAAATGCACAGAA[A/G]TCTTAGTTATCATTCTCTAGCATTAGAAGTGGAGCTGGGAGAGGCTCAGG
878	AM_12051	FMO4_c.843C>T(F281F)	rs3737926	snp	N	1	171303565	A // B	C // T	N/A	+	+	FMO4	PA28188	NM_002022.1|NP_002013.1|C|F|281|coding-synonymous|T|F|281	AACTACAGTGAATAATTTTCTCCTGTGTGTCAAAGGAAAAAAGCAAAATT[C/T]ATTGTGAATGATGAGCTGCCAAACTGTATCCTCTGTGGGGCAATCACTAT
879	AM_12052	FMO4_c.922A>T(T308S)	rs3737925	snp	N	1	171303644	A // B	A // T	N/A	+	+	FMO4	PA28188	NM_002022.1|NP_002013.1|A|T|308|coding-nonsynonymous|T|S|308	TCCTCTGTGGGGCAATCACTATGAAAACCAGCGTGATTGAATTTACAGAA[A/T]CCTCTGCTGTCTTTGAAGATGGGACAGTGGAAGAAAACATTGATGTTGTG
880	AM_12053	FMO4_c.968T>C(V323A)	rs1042767	snp	N	1	171303690	A // B	T // C	N/A	+	+	FMO4	PA28188	NM_002022.1|NP_002013.1|T|V|323|coding-nonsynonymous|C|A|323	GTTCTTCAAAAAATGGAAAAGAAAATGTATATCCTGTAGTGAAGATCACA[A/G]CATCAATGTTTTCTTCCACTGTCCCATCTTCAAAGACAGCAGAGGTTTCT
881	AM_12054	FMO4_c.1015G>C(E339Q)	rs61342270	snp	N	1	171303737	A // B	C // G	N/A	+	+	FMO4	PA28188	NM_002022.1|NP_002013.1|G|E|339|coding-nonsynonymous|C|Q|339	ATGTTGTGATCTTCACTACAGGATATACATTTTCTTTTCCATTTTTTGAA[C/G]AACCTCTTAAAAGCCTCTGTACAAAGAAGATATTTCTATACAAGCAAGTC
882	AM_12057	FMO4_c.1250+591C>T	rs7541966	snp	N	1	171307155	A // B	C // T	N/A	+	+	FMO4	PA28188	NM_002022.1|NP_002013.1||||intron|||	ACTTAGATATTTAATAGGCGTCTCAAATTTAATATGTCTAAAAATGAACT[C/T]TTGACCCCCTCCGCCCCCCATCTGCCCTGTAAATGGGCTGATCTGAAACT
883	AM_12058	FMO4_c.1251-1720A>G	rs2223477	snp	N	1	171308832	A // B	A // G	N/A	+	+	FMO4	PA28188	NM_002022.1|NP_002013.1||||intron|||	GATGCCCGGAGAAACCTGAAAAGTGCTAAGGCTGATGCCAAGGTCATGAA[A/G]GATGCAAAGATGAAGAAGGTAGTAGAGTCAAAGAAGAAGGCTGTTCAGAG
884	AM_12087	EPHX1_c.128G>C(R43T)	rs3738046	snp	N	1	226016558	A // B	G // C	N/A	+	+	EPHX1	PA27829	NM_000120.3|NP_000111.1|G|R|43|coding-nonsynonymous|C|T|43	TCTCCTCATCTGACGTTTCCACCTTGAAAGGGCGGATGCTGTCGTCCTCC[C/G]TGGCTGCGGACCTCGTGCCTGGCCCCCACCACCCATCTTCAAGTGGCAAA
885	AM_12088	EPHX1_c.145C>T(R49C)	rs2234697	snp	N	1	226016575	A // B	C // T	N/A	+	+	EPHX1	PA27829	NM_000120.3|NP_000111.1|C|R|49|coding-nonsynonymous|T|C|49	GGTGGTGGGGGCCAGGCACGAGGTCCGCAGCCAGGGAGGACGACAGCATC[C/T]GCCCTTTCAAGGTGGAAACGTCAGATGAGGAGATCCACGTAAGGCACCTT
886	AM_12089	EPHX1_c.204T>C(D68D)	rs2234698	snp	N	1	226019500	A // B	C // T	N/A	+	+	EPHX1	PA27829	NM_000120.3|NP_000111.1|T|D|68|coding-synonymous|C|D|68	CTCAACTTGGGGTCCTGAATTTTGCTCCAGGACTTACACCAGAGGATCGA[C/T]AAGTTCCGTTTCACCCCACCTTTGGAGGACAGCTGCTTCCACTATGGCTT
887	AM_12090	EPHX1_c.290G>A(W97X)	rs4986931	snp	N	1	226019586	A // B	G // A	N/A	+	+	EPHX1	PA27829	NM_000120.3|NP_000111.1|G|W|97|coding-nonsynonymous|A|X|97	GGTATCTGTTGAGAATCTCCACCTGCTTCTTCCAGTCAAATTCATTCCGC[C/T]AGTAGGAGATGACTTTCTTCAGGTAGTTGGAGTTGAAGCCATAGTGGAAG
888	AM_12091	EPHX1_c.303T>C(F101F)	rs2234699	snp	N	1	226019599	A // B	C // T	N/A	+	+	EPHX1	PA27829	NM_000120.3|NP_000111.1|T|F|101|coding-synonymous|C|F|101	TTCAACTCCAACTACCTGAAGAAAGTCATCTCCTACTGGCGGAATGAATT[C/T]GACTGGAAGAAGCAGGTGGAGATTCTCAACAGATACCCTCACTTCAAGAC
889	AM_12092	EPHX1_c.337T>C(Y113H)	rs1051740	snp	N	1	226019633	A // B	C // T	N/A	+	+	EPHX1	PA27829	NM_000120.3|NP_000111.1|T|Y|113|coding-nonsynonymous|C|H|113	ACTGGCGGAATGAATTTGACTGGAAGAAGCAGGTGGAGATTCTCAACAGA[C/T]ACCCTCACTTCAAGACTAAGATTGAAGGTATGTTTGCAAAACGCCAGCCA
890	AM_12093	EPHX1_c.357G>A(K119K)	rs2292566	snp	N	1	226019653	A // B	A // G	N/A	+	+	EPHX1	PA27829	NM_000120.3|NP_000111.1|G|K|119|coding-synonymous|A|K|119	TGGAAGAAGCAGGTGGAGATTCTCAACAGATACCCTCACTTCAAGACTAA[A/G]ATTGAAGGTATGTTTGCAAAACGCCAGCCAGAGAGGGATGTATGTCATGA
891	AM_12105	EPHX1_c.852C>T(P284P)	rs2292568	snp	N	1	226027659	A // B	C // T	N/A	+	+	EPHX1	PA27829	NM_000120.3|NP_000111.1|C|P|284|coding-synonymous|T|P|284	TTCGGGAGGTTTCTTGGCCTCACTGAGAGGGATGTGGAGCTGCTGTACCC[C/T]GTCAAGGAGAAGGTATTCTACAGCCTGATGAGGGAGAGCGGCTACATGCA
892	AM_12108	EPHX1_c.1071C>T(N357N)	rs1051741	snp	N	1	226032229	A // B	C // T	N/A	+	+	EPHX1	PA27829	NM_000120.3|NP_000111.1|C|N|357|coding-synonymous|T|N|357	TTTGTGTTCTGCGTTCCCAGGAAGTTCTCCCTGGACGACCTGCTGACCAA[C/T]GTCATGCTCTACTGGACAACAGGCACCATCATCTCCTCCCAGCGCTTCTA
893	AM_12112	EPHX1_c.1216T>C(L406L)	rs2234700	snp	N	1	226032896	A // B	T // C	N/A	+	+	EPHX1	PA27829	NM_000120.3|NP_000111.1|T|L|406|coding-synonymous|C|L|406	GGAGATGAGCTTTGGGTACTTGAACCTCACCCACTTTTCAGGCGTGTGCA[A/G]TAGCTCAAAAGGGAAGGCAGAGAAGCCAGTGGGCACATAGACCTTCATCC
894	AM_12113	EPHX1_c.1248G>A(K416K)	rs4149229	snp	N	1	226032928	A // B	A // G	N/A	+	+	EPHX1	PA27829	NM_000120.3|NP_000111.1|G|K|416|coding-synonymous|A|K|416	GCCTTCCCTTTTGAGCTATTGCACACGCCTGAAAAGTGGGTGAGGTTCAA[A/G]TACCCAAAGCTCATCTCCTATTCCTACATGGTTCGTGGGGGCCACTTTGC
895	AM_12114	EPHX1_c.1350G>C(S450S)	rs4149230	snp	N	1	226033030	A // B	C // G	N/A	+	+	EPHX1	PA27829	NM_000120.3|NP_000111.1|G|S|450|coding-synonymous|C|S|450	GCCTTTGAGGAGCCGGAGCTGCTCGCCCAGGACATCCGCAAGTTCCTGTC[C/G]GTGCTGGAGCGGCAATGACCCACCCCTCTCCCCCCGCCTGCCACCTCCCC
896	AM_12123	PTGIS_c.1498C>T(P500S)	rs5584	snp	N	20	48124462	A // B	T // C	N/A	-	-	PTGIS	PA292	NM_000961.3|NP_000952.1|C|P|500|coding-nonsynonymous|T|S|500	GCAGGCTGGGCAGAGGCGAGCACGTGGATCCATCTGCTCCCTGTGTCATG[A/G]GCGGATGCGGTAGCGGACGGGCACGTCGTGTTCCGGCTGCATCAGACCGA
897	AM_12124	PTGIS_c.1239C>T(D413D)	rs5630	snp	N	20	48127684	A // B	C // T	N/A	-	-	PTGIS	PA292	NM_000961.3|NP_000952.1|C|D|413|coding-synonymous|T|D|413	ACCTTCTTCCTATTTCAGGTATTTAAATACAACCGATTCCTGAACCCTGA[C/T]GGATCAGAGAAGAAAGACTTTTACAAGGATGGGAAACGGCTGAAGAATTA
898	AM_12125	PTGIS*4_c.1135C>A(R379S)	rs56195291	snp	N	20	48129688	A // B	A // C	N/A	-	-	PTGIS	PA292	NM_000961.3|NP_000952.1|C|R|379||||379	TGGTGGACCTGGCCATGCCCATGGCAGACGGGCGAGAATTCAACCTGCGA[A/C]GTGGTGACCGCCTCCTCCTCTTCCCCTTCCTGAGCCCCCAGAGAGACCCA
899	AM_12126	PTGIS_c.1117C>A(R373R)	rs5629	snp	N	20	48129706	A // B	C // A	N/A	-	-	PTGIS	PA292	NM_000961.3|NP_000952.1|C|R|373|coding-synonymous|A|R|373	CAGGAAGGGGAAGAGGAGGAGGCGGTCACCACGTCGCAGGTTGAATTCTC[G/T]CCCGTCTGCCATGGGCATGGCCAGGTCCACCACAACCTCGCGGGTGATGA
900	AM_12127	PTGIS_c.723A>G(L241L)	rs5627	snp	N	20	48140727	A // B	A // G	N/A	-	-	PTGIS	PA292	NM_000961.3|NP_000952.1|A|L|241|coding-synonymous|G|L|241	GGGGACAAGGACCACATGTGCAGTGTCAAAAGTCGCCTGTGGAAGCTGCT[A/G]TCCCCAGCCAGGCTGGCCAGGCGGGCCCACCGGAGCAAATGGCTGGAGAG
901	AM_12128	PTGIS_c.706C>T(R236C)	rs5626	snp	N	20	48140744	A // B	C // T	N/A	-	-	PTGIS	PA292	NM_000961.3|NP_000952.1|C|R|236|coding-nonsynonymous|T|C|236	TGTGCTCTGTCCCTGCAGGGGACAAGGACCACATGTGCAGTGTCAAAAGT[C/T]GCCTGTGGAAGCTGCTATCCCCAGCCAGGCTGGCCAGGCGGGCCCACCGG
902	AM_12129	PTGIS_c.591C>T(R197R)	rs5625	snp	N	20	48156189	A // B	T // C	N/A	-	-	PTGIS	PA292	NM_000961.3|NP_000952.1|C|R|197|coding-synonymous|T|R|197	AGCAGCCGGTCGAGCTGGCGAAAGGTGTGGAAGACATCAGCTGAGTGGAC[A/G]CGGTCCTGGGCCTGGCTTTCATGGGTGCGTGGCAGCGCCTCAATTCCGTA
903	AM_12130	PTGIS_c.511T>C(F171L)	rs5624	snp	N	20	48160852	A // B	T // C	N/A	-	-	PTGIS	PA292	NM_000961.3|NP_000952.1|T|F|171|coding-nonsynonymous|C|L|171	GCCGGGCCCCAGCAGGAGGGTGGGGGCTGCACAGCCTCACCTGAGCAGGA[A/G]GCTGTAGGAGAAGTCGAGGAGACCCATCTCGTGCCAGCCACTGCCTGCTT
904	AM_12131	PTGIS_c.461A>C(E154A)	rs5623	snp	N	20	48160902	A // B	C // A	N/A	-	-	PTGIS	PA292	NM_000961.3|NP_000952.1|A|E|154|coding-nonsynonymous|C|A|154	AGCTGTAGGAGAAGTCGAGGAGACCCATCTCGTGCCAGCCACTGCCTGCT[G/T]CTGTAGCATCGCCCAACAGCACTGCATGGAGGTTGGTATACATGGCTTCT
905	AM_12132	PTGIS_c.402G>T(Q134H)	rs6067121	snp	N	20	48160961	A // B	T // G	N/A	-	-	PTGIS	PA292	NM_000961.3|NP_000952.1|G|Q|134|coding-nonsynonymous|T|H|134	TCGCCCAACAGCACTGCATGGAGGTTGGTATACATGGCTTCTGTGAGTGC[A/C]TGGAGCTCTCTGTGGAGAAGAGTCCTGAGGCAGGAAACAAAAGCATGAAA
906	AM_12133	PTGIS*3_c.354T>A(S118R)	rs5622	snp	N	20	48164401	A // B	T // A	N/A	-	-	PTGIS	PA292	NM_000961.3|NP_000952.1|T|S|118|coding-nonsynonymous|A|R|118	CCACAGGTGCCATCTCCAGCCACTCACAGTTTCATCCTGGCCTTTTCATC[A/T]CTGGGGCTGTAATGTGGAAGCTGCACATCAAAAATCCTCTCCATGAGGAA
907	AM_12134	PTGIS_c.258G>T(V86V)	rs5621	snp	N	20	48164497	A // B	T // G	N/A	-	-	PTGIS	PA292	NM_000961.3|NP_000952.1|G|V|86|coding-synonymous|T|V|86	AGGAAGATGGCATAGGCATGGAAGTCGAGCCTGGTGCGAGGCTCCCACAC[A/C]ACCGCGTCGTAGGAGTGTGGGTCCAGGAGAACGGTGACATACCTGCCCCC
908	AM_12136	CYP24A1_19027delA	rs3834669	in-del	N	20	52771092	A // B	- // A	N/A	-	-	CYP24A1	PA27097	NM_000782.4|||||mrna-utr|||	GGAATTAAAGATTCAAACAGTGAATGTGGTAGGCAGGGCCTGAAACGGTT[-/T]GTAACCTCTACCTGACTGACAAGTGCCAGCCTCCCTTTCATGTCATGGAA
909	AM_12137	CYP24A1_18948C>T	rs4809957	snp	N	20	52771171	A // B	T // C	N/A	-	-	CYP24A1	PA27097	NM_000782.4|||||mrna-utr|||	GCCTCCCTTTCATGTCATGGAAGATGCAAGACAGAACAGGCTCCCAGGCC[A/G]TTCTAAGCACCTGAAGATGGTGCTGACACAGGTGAAGTGTAAACCAGCAG
910	AM_12138	CYP24A1_18904G>A	rs3171182	snp	N	20	52771215	A // B	A // G	N/A	-	-	CYP24A1	PA27097	NM_000782.4|||||mrna-utr|||	GAAGCGGACTGAGTGCTGGGATCCAAGGCATTCTACAGGGTTCACTGCTG[A/G]TTTACACTTCACCTGTGTCAGCACCATCTTCAGGTGCTTAGAATGGCCTG
911	AM_12139	CYP24A1_18869C>T	rs6068811	snp	N	20	52771250	A // B	T // C	N/A	-	-	CYP24A1	PA27097	NM_000782.4|||||mrna-utr|||	CAGGTGAAGTGTAAACCAGCAGTGAACCCTGTAGAATGCCTTGGATCCCA[A/G]CACTCAGTCCGCTTCCCTGAGTTGGATATGATGTTAGCAAATACCACCAT
912	AM_12140	CYP24A1_18858C>T	rs2762934	snp	N	20	52771261	A // B	T // C	N/A	-	-	CYP24A1	PA27097	NM_000782.4|||||mrna-utr|||	TAAACCAGCAGTGAACCCTGTAGAATGCCTTGGATCCCAGCACTCAGTCC[A/G]CTTCCCTGAGTTGGATATGATGTTAGCAAATACCACCATCTAGAAAGACA
913	AM_12141	CYP24A1_15484T>C(L409S)	rs6068812	snp	N	20	52774635	A // B	C // T	N/A	-	-	CYP24A1	PA27097	NM_000782.4|NP_000773.2|T|L|409|coding-nonsynonymous|C|S|409	ATTTACAACTCGGACTCTTGACAAGGCAACAGTTCTGGGTGAATATGCTT[C/T]ACCCAAAGGAGTAAGTAGAATTTGTATATTCTATACCTTACAAAACCTTG
914	AM_12145	CYP24A1_9028G>A(T248T)	rs6068816	snp	N	20	52781091	A // B	A // G	N/A	-	-	CYP24A1	PA27097	NM_000782.4|NP_000773.2|G|T|248|coding-synonymous|A|T|248	GGAGAATTCAGAATAAAAAGGCATTTGCATTTCTCTCAGATGATGAGCAC[A/G]TTTGGGAGGATGATGGTCACTCCAGTCGAGCTGCACAAGAGCCTCAACAC
915	AM_12147	CYP24A1_3900C>T(A184A)	rs2296241	snp	N	20	52786219	A // B	C // T	N/A	-	-	CYP24A1	PA27097	NM_000782.4|NP_000773.2|C|A|184|coding-synonymous|T|A|184	AACGGCTTTAAAATGTGTCTTTTGCGGTTGTTTTCTTTGAAGGTCTTGGC[C/T]GATTTTATGGGCAGAATAGATGAGCTCTGTGATGAAAGAGGCCACGTTGA
916	AM_12159	SLCO4A1_c.617G>A(R206K)	rs6090151	snp	N	20	61288423	A // B	A // G	N/A	+	+	SLCO4A1	PA35838	NM_016354.3|NP_057438.3|G|R|206|coding-nonsynonymous|A|K|206	GCCCCACTTCACGGCTGGCCGCTATGAGGTGGAGTTGGACGCGGGTGTCA[A/G]GACGTGCCCTGCCAACCCCGGCGCGGTGTGTGCGGACAGCACCTCGGGCC
917	AM_12160	SLCO4A1_c.797-286T>C	rs2236553	snp	N	20	61289743	A // B	C // T	N/A	+	+	SLCO4A1	PA35838	NM_016354.3|NP_057438.3||||intron|||	GGTCCCTTTCCCCACCCTGGGCCCCTAATTCCTGCCAGTGTCCATCTGTG[C/T]GGCTACTTAGACGCCCTGCAAACGGGGCTTCGAGGGCCTTTGCCCTTTCG
918	AM_12161	SLCO4A1_c.1639-23G>A	rs6090189	snp	N	20	61299341	A // B	G // A	N/A	+	+	SLCO4A1	PA35838	NM_016354.3|NP_057438.3||||intron|||	GAGGGATACAGCTACAGTCTCGGTACACCTGGGAAGCCCAACAATAGCTC[C/T]GATTACAAGGGGAAGGCACGGGGGCCCCTTCCCAGGGTCCAGGGGAGGAC
919	AM_12162	SLCO4A1_c.*45C>T	rs6090200	snp	N	20	61303290	A // B	C // T	N/A	+	+	SLCO4A1	PA35838	NM_016354.3|||||mrna-utr|||	GTCTGACCACCGCCCGCGCCCACCCGGCCACGGCGGGCACTCAGCATTTC[C/T]TGATGACAGAACAGTGCCGTTGGGTGATGCAATCACACGGGAACTTCTAT
920	AM_12165	SLCO4A1_c.*497C>T	rs3787537	snp	N	20	61303742	A // B	T // C	N/A	+	+	SLCO4A1	PA35838	NM_016354.3|NP_057438.3||||locus-region|||	GCCGACTTACGGGGGAGCCTGTGGATAAGGAAGGCCAACTTTTCATATCC[A/G]CGGATTCCACAGGGCTGACTACAGGACGTGGGCCAAGGATGGCGAGACCA
921	AM_12167	SETD4_c.262C>T(V88I)	rs1143663	snp	N	21	37442675	A // B	T // C	N/A	-	-	CBR1	PA25814	NM_001757.2|NP_001748.1|G|V|88|coding-nonsynonymous|A|I|88	GCGCCCTGCGCGACTTCCTGCGCAAGGAGTACGGGGGCCTGGACGTGCTG[A/G]TCAACAACGCGGGCATCGCCTTCAAGGGTATGGGGAGGGGACGTGGCCTC
922	AM_12168	CBR1_c.391G>A(P131S)	rs41557318	snp	N	21	37443349	A // B	A // G	N/A	-	-	CBR1	PA25814	NM_001757.2|NP_001748.1|C|P|131|coding-nonsynonymous|T|S|131	ATCAAGCCCCAAAGAGAAGGTGCGCTGTTTCCCATCAGACTCACCTTGGG[A/G]TTTTATTAGAGGGAGTAATTCTGTGCACACATCTCGGGTACCAAAGAAAT
923	AM_12169	CBR1_c.397+210C>G	rs1005695	snp	N	21	37443565	A // B	G // C	N/A	+	+	CBR1	PA26121	NM_001757.2|NP_001748.1||||intron|||	TGAGCTAAGACCTGAAGGATGAGAGTCAGCCAGGTGTGCAAAGACCAGTG[C/G]GACAGGGAGGACGAATGGCCATGGGAGTGGGAGAAGTGAGGACAAAGTCC
924	AM_12170	CBR1_c.397+538C>T	rs3787728	snp	N	21	37443893	A // B	C // T	N/A	+	+	CBR1	PA26121	NM_001757.2|NP_001748.1||||intron|||	CCACAATCTAAGATATTTCCAGAGGATCCCTATCCTTTTCCCTAAGTCGT[C/T]TGGGACACAGACCCCACCACCCACCCACCAGGATCCTGCAGGTCACCATG
925	AM_12171	CBR1_c.398-48C>T	rs2835265	snp	N	21	37444696	A // B	C // T	N/A	+	+	CBR1	PA26121	NM_001757.2|NP_001748.1||||intron|||	TGAAAATTTTCTGCTCCAAAATCCCTGCAAATTTGGCATTCACCTCTCTA[C/T]GGGATTGTTGCACACCTTTCTACATAATGCTTTGTGGTGTATCTTAGGGA
926	AM_12172	CBR1_c.*559C>G	rs998383	snp	N	21	37445739	A // B	C // G	N/A	+	+	CBR1	PA26121	NM_001757.2||||||||	CTGGCTCTGGCCCTTCCCAGCCTCTAGGAAAACAAATAGTACCACAACGG[C/G]AAAGGCAGCTGACCTGGTCTCTTTAAAAAAGCCAAAGTCATTGGGGAAAA
927	AM_12174	CBR3_c.11G>A(C4Y)	rs8133052	snp	N	21	37507501	A // B	A // G	N/A	+	+	CBR3	PA26122	NM_001236.3|NP_001227.1|G|C|4|coding-nonsynonymous|A|Y|4	TCCGCCCTCCACGCAGGTGCCCCGCGCTCCCCGCTCAGCCATGTCGTCCT[A/G]CAGCCGCGTGGCGCTGGTGACCGGGGCCAACAGGGGCATCGGCTTGGCCA
928	AM_12175	CBR3_c.250C>G(L84V)	rs9282628	snp	N	21	37507740	A // B	C // G	N/A	+	+	CBR3	PA26122	NM_001236.3|NP_001227.1|C|L|84|coding-nonsynonymous|G|V|84	TGCAGAGCATCCGCGCCCTGCGCGACTTCCTGCGCAAGGAGTACGGGGGG[C/G]TCAACGTACTGGTCAACAACGCGGCCGTCGCCTTCAAGAGTAGGTGCAGG
929	AM_12176	CBR3_c.277G>A(V93I)	rs2835285	snp	N	21	37507767	A // B	A // G	N/A	+	+	CBR3	PA26122	NM_001236.3|NP_001227.1|G|V|93|coding-nonsynonymous|A|I|93	TCCTGCGCAAGGAGTACGGGGGGCTCAACGTACTGGTCAACAACGCGGCC[A/G]TCGCCTTCAAGAGTAGGTGCAGGGCTTGGGTTGGGGCCCCCTGGAGCGCT
930	AM_12177	CBR3_c.391C>T(P131S)	rs16993929	snp	N	21	37510224	A // B	T // C	N/A	+	+	CBR3	PA26122	NM_001236.3|NP_001227.1|C|P|131|coding-nonsynonymous|T|S|131	TCTTACTGAGGGATGCAACCCGACTGTCCACACGTTGGGCTTACCATGAG[A/G]TTTCATTATCGGCAGTAACTCGTTGCACATGTTTCTAGTGGCAAAAAAAT
931	AM_12178	CBR3_c.398-12G>A	rs2835286	snp	N	21	37518362	A // B	A // G	N/A	+	+	CBR3	PA26122	NM_001236.3|NP_001227.1||||intron|||	ATTATTCAACCAGTGGTTGTACCTCTGTGATATGCTTTCATATATTTATC[A/G]TTCTGTTTCAGGGAGAGTGGTGAATATCAGTAGTTTGCAGTGTTTAAGGG
932	AM_12181	CBR3_c.730G>A(V244M)	rs1056892	snp	N	21	37518706	A // B	A // G	N/A	+	+	CBR3	PA26122	NM_001236.3|NP_001227.1|G|V|244|coding-nonsynonymous|A|M|244	GCCCAGGACCAGTGAAGACAGACATGGATGGGAAAGACAGCATCAGGACT[A/G]TGGAGGAGGGGGCTGAGACCCCTGTCTACTTGGCCCTCTTGCCTCCAGAT
933	AM_12204	ABCG1_c.589-407A>G	rs492338	snp	N	21	43701977	A // B	G // A	N/A	+	+	ABCG1	PA24408	NM_004915.3|NP_004906.3||||intron|||	ATACGGAGAAGGTGTCCAGTCAATACTTGATGAATGGACACATGAGAGGA[C/T]GCACAATTTCTGGTGGTTTCTGCCCAGAACGAAGGGGAGGGTCGCTGTGA
934	AM_12205	ABCG1_c.973+672G>A	rs3788007	snp	N	21	43706776	A // B	G // A	N/A	+	+	ABCG1	PA24408	NM_004915.3|NP_004906.3||||intron|||	CCTCCATGCAGGCTTCAGACCTCACCTCCCCTGCCCCACTCAGCAGCATC[C/T]GTTAGTGACCCGTTACTGATCTGTTACTCTTCCTTGTGAGCGAGCACGAA
935	AM_12206	ABCG1_c.974-898C>G	rs425215	snp	N	21	43707101	A // B	G // C	N/A	+	+	ABCG1	PA24408	NM_004915.3|NP_004906.3||||intron|||	AGCTACCCGCTTCCTCCCAGCTGGTACGGAGGCCACCACACCTCCTAGAT[C/G]AAGCCACAAACCAGGACACATTGGCCCCACCGGAAAGTCATCCTCAAGGG
936	AM_12207	ABCG1_c.1430-293C>G	rs914189	snp	N	21	43710909	A // B	C // G	N/A	+	+	ABCG1	PA24408	NM_004915.3|NP_004906.3||||intron|||	CAGCCTTGCTCACAGGAAGGCACCACGTTGATGCAGAGTTTCAGAAGAGG[C/G]AGACTCAGGAAGAGTAAGGCCAGGCATGAATCCTTGCCTTCATCACTAAG
937	AM_12208	ABCG1_c.1809-252G>A	rs3788010	snp	N	21	43716022	A // B	A // G	N/A	+	+	ABCG1	PA24408	NM_004915.3|NP_004906.3||||intron|||	CGGAAGTGAACACAAGACTTCTCAGTGCATTTCACCAGTGAATATGTACC[A/G]CTCATTCAACTTGTTTTTTTGCTGGGGGCCCTGGAGGAAACAAAATTGGA
938	AM_12209	ABCG1_c.*399G>A	rs1044317	snp	N	21	43716901	A // B	A // G	N/A	+	+	ABCG1	PA24408	NM_004915.3|||||mrna-utr|||	CCGTGGGTCCTGGATGGGGAACTGCAAGCAGCCTCTCAGCTGATGGCTGC[A/G]CAGTCAGATGTCTGGTGGCAGAGAGTCCGAGCATGGAGCGATTCCATTTT
939	AM_12210	ABCG1_c.*1981G>A	rs1541290	snp	N	21	43718483	A // B	A // G	N/A	+	+	ABCG1	PA24408	NM_004915.3|||||mrna-utr|||	TTGGAAAAAGGCAAAAGTCCTTGCTCATGACTCAGAACTACATCGAGTGA[A/G]GTCAGTGTTGAAAACGCCCATTCCCTCCAGGTGAGCCTTCCCCATTGTGG
940	AM_12213	SLC19A1_c.1242C>A(I414I)	rs57725551	snp	N	21	46945782	A // B	C // A	N/A	-	-	SLC19A1	PA327	NM_194255.1|NP_919231.1|C|I|414|coding-synonymous|A|I|414	TGCTTGCGGACCGGGAGGCCCAGGCCCCGCACGTCCGAGACAATGAAAGT[G/T]ATGATGGTCTTGACGATGGTGGCAAAGAACGTGTTGACCCCGAAGACCAG
941	AM_12214	SLC19A1_c.696T>C(P232P)	rs12659	snp	N	21	46951556	A // B	C // T	N/A	-	-	SLC19A1	PA327	NM_194255.1|NP_919231.1|T|P|232|coding-synonymous|C|P|232	GACCGGGGGCGGTGCGAAACCTCGGCTTCGGAGCTGGAGCGCATGAATCC[C/T]GGCCCAGGCGGGAAGCTGGGACACGCCCTGCGGGTGGCCTGTGGGGACTC
942	AM_12215	SLC19A1_c.246C>G(P82P)	rs1051269	snp	N	21	46952006	A // B	G // C	N/A	-	-	SLC19A1	PA327	NM_194255.1|NP_919231.1|C|P|82|coding-synonymous|G|P|82	TGCAGCAGCAGCACCGGCGTGTAGCGCAGGTAGTCGGTGAGCAGGAACAC[C/G]GGCACCAGCACGGCCAGGTAGGAGTACGACAGCACCGGCGTGATCTCGTT
943	AM_12216	SLC19A1_c.80A>G(H27R)	rs1051266	snp	N	21	46957794	A // B	A // G	N/A	-	-	SLC19A1	PA327	NM_194255.1|NP_919231.1|A|H|27|coding-nonsynonymous|G|R|27	GCAGGTGCCCGTGGAACCTGGGCCTGACCCCGAGCTCCGGTCCTGGCGGC[A/G]CCTCGTGTGCTACCTTTGCTTCTACGGCTTCATGGCGCAGATACGGCCAG
944	AM_12217	SLC19A1_c.-50+786A>G	rs60881836	snp	N	21	46961496	A // B	G // A	N/A	-	-	SLC19A1	PA327	NM_194255.1|NP_919231.1||||intron|||	CAGGACAGGAGTTTCCGATGGACAGGACCCTAGGGGGATGGCTTTCCTGC[C/T]GTAGCGGTGTTGGAAGGACCCACTCGGGAAAGGCTCCAGCGGCTGTCCAG
945	AM_12220	COMT_c.36C>T(H12H)	rs4633	snp	N	22	19950235	A // B	C // T	N/A	+	+	COMT	PA117	NM_007310.2|NP_009294.1|C|H|12|coding-synonymous|T|H|12	ATCCACAACCTGCTCATGGGTGACACCAAGGAGCAGCGCATCCTGAACCA[C/T]GTGCTGCAGCATGCGGAGCCCGGGAACGCACAGAGCGTGCTGGAGGCCAT
946	AM_12225	COMT_c.154G>A(A52T)	rs5031015	snp	N	22	19951103	A // B	A // G	N/A	+	+	COMT	PA117	NM_007310.2|NP_009294.1|G|A|52|coding-nonsynonymous|A|T|52	TGTGCTCACCTCTCCTCCGTCCCCAACCCTGCACAGGCAAGATCGTGGAC[A/G]CCGTGATTCAGGAGCACCAGCCCTCCGTGCTGCTGGAGCTGGGGGCCTAC
947	AM_12228	COMT_c.288C>T(A96A)	rs8192488	snp	N	22	19951237	A // B	C // T	N/A	+	+	COMT	PA117	NM_007310.2|NP_009294.1|C|A|96|coding-synonymous|T|A|96	CTGTCACCAGGGGCGAGGCTCATCACCATCGAGATCAACCCCGACTGTGC[C/T]GCCATCACCCAGCGGATGGTGGATTTCGCTGGCGTGAAGGACAAGGTGTG
948	AM_12229	COMT_c.322G>A(V108M)	rs4680	snp	N	22	19951271	A // B	A // G	N/A	+	+	COMT	PA117	NM_007310.2|NP_009294.1|G|V|108|coding-nonsynonymous|A|M|108	TCAACCCCGACTGTGCCGCCATCACCCAGCGGATGGTGGATTTCGCTGGC[A/G]TGAAGGACAAGGTGTGCATGCCTGACCCGTTGTCAGACCTGGAAAAAGGG
949	AM_12230	COMT_c.447G>A(P149P)	rs769224	snp	N	22	19951804	A // B	G // A	N/A	+	+	COMT	PA117	NM_007310.2|NP_009294.1|G|P|149|coding-synonymous|A|P|149	CTGGCACGGATGCCATCCTGGTTGGGGCTCACCTCCAAGAGAAGCGTGTC[C/T]GGCAGGTACCGGTCCTTCCAGTGGTCGAGGAAGACCATGTCCAGTGTGTC
950	AM_12232	GSTT2_c.195C>T(T65T)	rs364069	snp	N	22	24302486	A // B	C // T	N/A	-	-	GSTT2	PA29030	NM_000854.3|NP_000845.1|C|T|65|coding-synonymous|T|T|65	AACAGCCTGGGGAAACTGCCGACGCTCAAGGATGGTGATTTCATCTTGAC[C/T]GAAAGGTGCCCTCCTTCCCTCACCCCTCACCGCATCCGGAGCCCATGTGA
951	AM_12233	GSTT2_c.195C>T(T65T)_alternate	rs364069	snp	N	22	24323221	A // B	G // A	N/A	-	-	GSTT2	PA29030	NM_000854.3|NP_000845.1|C|T|65|coding-synonymous|T|T|65	AACAGCCTGGGGAAACTGCCGACGCTCAAGGATGGTGATTTCATCTTGAC[C/T]GAAAGGTGCCCTCCTTCCCTCACCCCTCACCGCATCCGGAGCCCATGTGA
952	AM_12235	GSTT2_c.203G>A(S68L)	rs72549344	snp	N	22	24324821	A // B	G // A	N/A	-	-	GSTT2	PA29030	NM_000854.3|NP_000845.1|C|S|68|coding-nonsynonymous|T|L|68	AAATGCCTGGTGCCAGTGTCCTTATAGCCACTGCCCATTTGTTCCCAGCT[C/T]GGCCATCCTGATTTACCTGAGCTGTAAGTACCAGACGCCGGACCACTGGT
953	AM_12237	GSTT2_c.417C>T(M139I)	rs1622002	snp	N	22	24325127	A // B	C // T	N/A	-	-	GSTT2	PA29030	NM_000854.3|NP_000845.1|G|M|139|coding-nonsynonymous|A|I|139	AAGGGCCTGTCCCCCAGGAACTTGTCCTCCAGCCATTGCAGGGCCTGGTC[C/T]ATGGCAGTCCTGTTGCGTTCCACCTTCTCCTTGGGCACCTGGACCCCAAT
954	AM_12238	GSTT1_c.517G>A(E173K)	rs2234953	snp	N	22	24376833	A // B	G // A	N/A	-	-	GSTT1	PA183	NM_000853.2|NP_000844.2|G|E|173|coding-nonsynonymous|A|K|173	GCCCCCTGCCTAGTGGGTTCACCTGCCCACAGCACTCACATGCATCAGCT[C/T]CGTGATGGCTACGAGGTCAGCTAAGGAGATGTGAGGACCAGTAAGGAAGG
955	AM_12239	GSTT1_c.505G>A(V169I)	rs2266637	snp	N	22	24376845	A // B	G // A	N/A	-	-	GSTT1	PA183	NM_000853.2|NP_000844.2|G|V|169|coding-nonsynonymous|A|I|169	GTGGGTTCACCTGCCCACAGCACTCACATGCATCAGCTCCGTGATGGCTA[C/T]GAGGTCAGCTAAGGAGATGTGAGGACCAGTAAGGAAGGCCTTGTTCTGGA
956	AM_12241	GSTT1_c.354G>A(V118V)	rs2266636	snp	N	22	24376996	A // B	G // A	N/A	-	-	GSTT1	PA183	NM_000853.2|NP_000844.2|G|V|118|coding-synonymous|A|V|118	GCTGCCAGTGTCTGGGGAGATACTGGCTCACCCAGGAAAACAGGGAACAT[C/T]ACCTGGGGATTGGGCAGGCAAAGTCGGGAGTTACTGGAGTAGGGAGTTAG
957	AM_12242	GSTT1*B_c.310A>C(T104P)	rs11550605	snp	N	22	24379402	A // B	C // A	N/A	-	-	GSTT1	PA183	NM_000853.2|NP_000844.2|A|T|104|coding-nonsynonymous|C|P|104	CAGCCTCACCTTATGCCACAAGGCCCGGAGGCAGCTTCTCCGCAGAGTCG[G/T]GTGCTGCCATGCCAGGTACTCATCCACACGGGCACGGGCCTGCAGGTCCT
958	AM_12243	GSTT1_c.134T>G(F45C)	rs17856199	snp	N	22	24381766	A // B	T // G	N/A	-	-	GSTT1	PA183	NM_000853.2|NP_000844.2|T|F|45|coding-nonsynonymous|G|C|45	AGTCCCCGTCCTTCAAGGCTGGCACCTTCTTGAGGGGGTTCACCTGGGCA[A/C]AGGCATCGCTTAAGTGCTGACCTGGGAAGAGTCCAGCATGGTGGGTGGTG
959	AM_12245	GSTT1_c.61G>A(A21T)	rs2266635	snp	N	22	24384171	A // B	G // A	N/A	-	-	GSTT1	PA183	NM_000853.2|NP_000844.2|G|A|21|coding-nonsynonymous|A|T|21	TTTAATCAGATCCACGATGCGCAGCTCGAAGGGAATGTCGTTCTTCTTGG[C/T]AAAGATGTAAACAGCGCGGCAGGGCTGGGACAGCAGGTCCAGGTACAGCT
960	AM_12247	CYP2D6_4180G>C(S486T)	rs1135840	snp	N	22	42522613	A // B	G // C	N/A	-	-	CYP2D6	PA128	NM_000106.4|NP_000097.2|G|S|486|coding-nonsynonymous|C|T|486	TAGGTACCCCATTCTAGCGGGGCACAGCACAAAGCTCATAGGGGGATGGG[C/G]TCACCAGGAAAGCAAAGACACCATGGTGGCTGGGCCGGGGCTGTCCAGTG
961	AM_12248	CYP2D6*18_4125dupGTGCCCACT	rs1135836	in-del	Y	22	42522660	A // B	T // TGTGCCCACT	N/A	-	-	CYP2D6	PA128	||||||||	GGGGTCACCAGGAAAGCAAAGACACCATGGTGGCTGGGCCGGGGCTGTCC[A/AGTGGGCACA]GTGGGCACCGAGAAGCTGAAGTGCTGCAGCAGGGAGGTGAAGAAGAGGAA
962	AM_12252	CYP2D6*42_3259insGT	rs72549346	in-del	Y	22	42523533	A // B	- // GT	N/A	-	-	CYP2D6	PA128	||||||||	GATGGGTGACCAGGCTCACATGCCCTACACCACTGCCGTGATTCATGAGGT[-/GT]GCAGCGCTTTGGGGACATCGTCCCCCTGGGTGTGACCCATATGACATCCC
963	AM_12254	CYP2D6*56_3201C>T(R344X)	rs72549347	snp	Y	22	42523592	A // B	C // T	N/A	-	-	CYP2D6	PA128	NM_000106.4|NP_000097.2|C|R|344|coding-nonsynonymous|T|X|344	GTCCAGGCCGTGTCCAACAGGAGATCGACGACGTGATAGGGCAGGTGCGG[C/T]GACCAGAGATGGGTGACCAGGCTCACATGCCCTACACCACTGCCGTGATT
964	AM_12255	CYP2D6*29_3183G>A(V338M)	rs59421388	snp	Y	22	42523610	A // B	G // A	N/A	-	-	CYP2D6	PA128	NM_000106.4|NP_000097.2|G|V|338|coding-nonsynonymous|A|M|338	GGGCATGTGAGCCTGGTCACCCATCTCTGGTCGCCGCACCTGCCCTATCA[C/T]GTCGTCGATCTCCTGTTGGACACGGCCTGGACAGACATGCGTCCCCACAA
965	AM_12257	CYP2D6*41_2988G>A(SpliceDefect)	rs28371725	snp	Y	22	42523805	A // B	G // A	N/A	-	-	CYP2D6	PA128	NM_000106.4|NP_000097.2||||intron|||	TGGAGCCCCGGGTGTCCCAGCAAAGTTCATGGGCCCCCGCCTGTACCCTT[C/T]CTCCCTCGGCCCCTGCACTGTTTCCCAGATGGGCTCACGCTGCACATCCG
966	AM_12258	CYP2D6*44_2950G>C(SpliceDefect)	rs72549349	snp	Y	22	42523843	A // B	C // G	N/A	-	-	CYP2D6	PA128	NM_000106.4||||||||	CACGCTGGCCTGGGGCCTCCTGCTCATGATCCTACATCCGGATGTGCAGC[C/G]TGAGCCCATCTGGGAAACAGTGCAGGGGCCGAGGGAGGAAGGGTACAGGC
967	AM_12259	CYP2D6*7_2935A>C(H324P)	rs5030867	snp	Y	22	42523858	A // B	A // C	N/A	-	-	CYP2D6	PA128	NM_000106.4|NP_000097.2|A|H|324|coding-nonsynonymous|C|P|324	GGTGACCACCTCGACCACGCTGGCCTGGGGCCTCCTGCTCATGATCCTAC[A/C]TCCGGATGTGCAGCGTGAGCCCATCTGGGAAACAGTGCAGGGGCCGAGGG
968	AM_12261	CYP2D6_2850C>T(R296C)	rs16947	snp	Y	22	42523943	A // B	T // C	N/A	-	-	CYP2D6	PA128	NM_000106.4|NP_000097.2|C|R|296|coding-nonsynonymous|T|C|296	GGTCGAGGTGGTCACCATCCCGGCAGAGAACAGGTCAGCCACCACTATGC[A/G]CAGGTTCTCATCATTGAAGCTGCTCTCAGGGTTCCCCTTGGCCTGAGCAG
969	AM_12264	CYP2D6*9_2615delAAG	rs28371720	in-del	Y	22	42524178	A // B	- // AGA	N/A	-	-	CYP2D6	PA128	NM_000106.4|NP_000097.2|AGA|R|281||||281	CCCAGCCCAGCCCCCCCGAGACCTGACTGAGGCCTTCCTGGCAGAGATGG[-/AGA]AGGTGAGAGTGGCTGCCACGGTGGGGGGCAAGGGTGGTGGGTTGAGCGTC
970	AM_12265	CYP2D6*38_2587delGACT	rs72549351	in-del	Y	22	42524203	A // B	- // GACT	N/A	-	-	CYP2D6	PA128	NM_000106.4|NP_000097.2|GACT|LT|271||||271	CCCACCGTGGCAGCCACTCTCACCTTCTCCATCTCTGCCAGGAAGGCCTC[-/AGTC]AGGTCTCGGGGGGGCTGGGCTGGGTCCCAGGTCATCCTGTGCTCAGTTAG
971	AM_12266	CYP2D6*21_2573insC	rs72549352	in-del	Y	22	42524213	A // B	- // C	N/A	-	-	CYP2D6	PA128	||||||||	ATGAGCTGCTAACTGAGCACAGGATGACCTGGGACCCAGCCCAGCCCCCCC[-/C]GAGACCTGACTGAGGCCTTCCTGGCAGAGATGGAGAAGGTGAGAGTGGCT
972	AM_12267	CYP2D6*3_2549delA(R259X)	rs35742686	in-del	Y	22	42524244	A // B	- // A	N/A	-	-	CYP2D6	PA128	NM_000106.4|NP_000097.2|A|R|259|coding-nonsynonymous|-|X|259	GAAGGCCTCAGTCAGGTCTCGGGGGGGCTGGGCTGGGTCCCAGGTCATCC[-/T]GTGCTCAGTTAGCAGCTCATCCAGCTGGGTCAGGAAAGCCTTTTGGAAGC
973	AM_12268	CYP2D6*19_2539delAACT	rs72549353	in-del	Y	22	42524251	A // B	- // AACT	N/A	-	-	CYP2D6	PA128	NM_000106.4|NP_000097.2|AACT|LT|255||||255	TCAGTCAGGTCTCGGGGGGGCTGGGCTGGGTCCCAGGTCATCCTGTGCTC[-/AGTT]AGCAGCTCATCCAGCTGGGTCAGGAAAGCCTTTTGGAAGCGTAGGACCTT
974	AM_12270	CYP2D6*20_1973insG	rs72549354	in-del	Y	22	42524819	A // B	- // G	N/A	-	-	CYP2D6	PA128	||||||||	GTCTCTCGCTCCGCACCTCGCGCAGAAAGCCCGACTCCTCCTTCAGTCCC[-/C]TCCTGAGCTAGGTCCAGCAGCCTGAGGAAGCGAGGGTCGTCGTACTCGAAG
975	AM_12272	CYP2D6*40_1863ins(TTTCGCCCC)2	rs72549356	in-del	Y	22	42524929	A // B	- // TTTCGCCCCTTTCGCCCC	N/A	-	-	CYP2D6	PA128	||||||||	CAGGTGAGGGAGGCGATCACGTTGCTCACGGCTTTGTCCAAGAGACCGTT[-/GGGGCGAAAGGGGCGAAA]GGGGCGAAAGGGGCGTCCTGGGGGTGGGAGATGCGGGTAAGGGGTCGCCTT
976	AM_12274	CYP2D6*4_1846G>A(SpliceDefect)	rs3892097	snp	Y	22	42524947	A // B	G // A	N/A	-	-	CYP2D6	PA128	NM_000106.4||||||||	CACGTTGCTCACGGCTTTGTCCAAGAGACCGTTGGGGCGAAAGGGGCGTC[C/T]TGGGGGTGGGAGATGCGGGTAAGGGGTCGCCTTCCCCGTCCCCCGCCTTC
977	AM_12275	CYP2D6*14or*8_1758G>A>T(G169RorX)	rs5030865	snp	Y	22	42525035	A // B // C	T // G // A	N/A	-	-	CYP2D6	PA128	NM_000106.4|NP_000097.2|G|G|169|coding-nonsynonymous|AorT|RorX|169	GTCCCCCGCCTTCCCAGTTCCCGCTTTGTGCCCTTCTGCCCATCACCCAC[A/C/T]GGAGTGGTTGGCGAAGGCGGCACAAAGGCAGGCGGCCTCCTCGGTCACCC
978	AM_12276	CYP2D6*6_1707delT(W152X)	rs5030655	in-del	Y	22	42525086	A // B	- // T	N/A	-	-	CYP2D6	PA128	NM_000106.4|NP_000097.2|T|W|152|coding-nonsynonymous|-|X|152	GGAGTGGTTGGCGAAGGCGGCACAAAGGCAGGCGGCCTCCTCGGTCACCC[-/A]CTGCTCCAGCGACTTCTTGCCCAGGCCCAAGTTGCGCAAGGTGGAGACGG
979	AM_12277	CYP2D6_1661G>C(V136V)	rs1058164	snp	Y	22	42525132	A // B	C // G	N/A	-	-	CYP2D6	PA128	NM_000106.4|NP_000097.2|G|V|136|coding-synonymous|C|V|136	TTCCTGGCGCGCTATGGGCCCGCGTGGCGCGAGCAGAGGCGCTTCTCCGT[C/G]TCCACCTTGCGCAACTTGGGCCTGGGCAAGAAGTCGCTGGAGCAGTGGGT
980	AM_12278	CYP2D6*29_1659G>A(V136I)	rs61736512	snp	Y	22	42525134	A // B	A // G	N/A	-	-	CYP2D6	PA128	NM_000106.4|NP_000097.2|G|V|136|coding-nonsynonymous|A|I|136	TGTTCCTGGCGCGCTATGGGCCCGCGTGGCGCGAGCAGAGGCGCTTCTCC[A/G]TCTCCACCTTGCGCAACTTGGGCCTGGGCAAGAAGTCGCTGGAGCAGTGG
981	AM_12280	CYP2D6_1023C>T(T107I)	rs28371706	snp	Y	22	42525772	A // B	T // C	N/A	-	-	CYP2D6	PA128	NM_000106.4|NP_000097.2|C|T|107|coding-nonsynonymous|T|I|107	GTCCCCACCGCTGCTTGCCTTGGGAACGCGGCCCGAAACCCAGGATCTGG[A/G]TGATGGGCACAGGCGGGCGGTCGGCGGTGTCCTCGCCGTGGGTCACCAGC
982	AM_12281	CYP2D6*11_883G>C(SpliceDefect)	rs5030863	snp	Y	22	42525912	A // B	G // C	N/A	-	-	CYP2D6	PA128	NM_000106.4||||||||	GGCGTCCAGGCCAGCTGCAGGCTGAACACGTCCCCGAAGCGGCGCCGCAA[C/G]TGCAGAGGGAGGGTCAGGGCCTCTTGTCAAGCCAGGATCCCCCCAGACTA
983	AM_12283	CYP2D6*15_137insT	rs72549357	in-del	Y	22	42526657	A // B	T // TT	N/A	-	-	CYP2D6	PA128	||||||||	GGCTGCACGCTACCCACCAGGCCCCCTGCCACTGCCCGGGCTGGGCAACC[T/TT]GCTGCATGTGGACTTCCAGAACACACCATACTGCTTCGACCAGGTGAGGG
984	AM_12284	CYP2D6*12_124G>A(G42R)	rs5030862	snp	Y	22	42526670	A // B	G // A	N/A	-	-	CYP2D6	PA128	NM_000106.4|NP_000097.2|G|G|42|coding-nonsynonymous|A|R|42	GAAGCAGTATGGTGTGTTCTGGAAGTCCACATGCAGCAGGTTGCCCAGCC[C/T]GGGCAGTGGCAGGGGGCCTGGTGGGTAGCGTGCAGCCCAGCGTTGGCGCC
985	AM_12285	CYP2D6_100C>T(P34S)	rs1065852	snp	Y	22	42526694	A // B	T // C	N/A	-	-	CYP2D6	PA128	NM_000106.4|NP_000097.2|C|P|34|coding-nonsynonymous|T|S|34	GTCCACATGCAGCAGGTTGCCCAGCCCGGGCAGTGGCAGGGGGCCTGGTG[A/G]GTAGCGTGCAGCCCAGCGTTGGCGCCGGTGCATCAGGTCCACCAGGAGCA
986	AM_12291	CYP2D6_-1584C>G	rs1080985	snp	N	22	42528382	A // B	G // C	N/A	-	-	CYP2D6	PA128	NM_000106.4||||||||	ATGAGCCACCGCACCCAATCCCAGCTAATTTTGTATTTTTTGTAGAGACC[C/G]GGTTCTTCCAAGTTGTCCAGGCTGGTCTTGAATTCCTGGGGTGAAGCGAT
987	AM_12303	SULT4A1_c.*1208G>T	rs138056	snp	N	22	44220673	A // B	T // G	N/A	-	-	SULT4A1	PA412	NM_014351.3|||||mrna-utr|||	CCCGTTTCAAATACAGCACCAAGAACGGAGACCCCTTCCACAGCAGCGAC[A/C]CTCCTGACCACCACTTTGGGTGCTTTCCAGCCACATAAATGACAGACAAC
988	AM_12304	SULT4A1_c.*634T>C	rs138057	snp	N	22	44221247	A // B	T // C	N/A	-	-	SULT4A1	PA412	NM_014351.3|||||mrna-utr|||	GCTCCTCTGCATTGGGCCTTTGGAGCCGCCCGCTGGAAGTCTCTGGCAGA[A/G]GGACGTCCATTCTGAAGACCTAGTGAACAATTTCTGCTCATTTCAGGAAG
989	AM_12305	SULT4A1_c.*410G>T	rs3179394	snp	N	22	44221471	A // B	T // G	N/A	-	-	SULT4A1	PA412	NM_014351.3|||||mrna-utr|||	ATAATAAAACTACAAAAATAAAGAGTTAACCCTGAGATCTTTCTACCATT[A/C]GGGTGTGGCTCGCTCCTGATTCCCCTTGGAAATGAACTTTTATTTGGTTT
990	AM_12307	SULT4A1_c.464G>A(R155Q)	rs11542811	snp	N	22	44234791	A // B	G // A	N/A	-	-	SULT4A1	PA412	NM_014351.3|NP_055166.1|G|R|155|coding-nonsynonymous|A|Q|155	ACTCACGCTTATCATTCATAAACCTCCGGCAGAATTCTTGAAAGGTGCCT[C/T]GGTAGCTCATGGTCCGCAGAGAGCGGTGGAACTGATAATAAGACACCACC
991	AM_12308	SULT4A1_c.378C>A(S126S)	rs17852027	snp	N	22	44235828	A // B	C // A	N/A	-	-	SULT4A1	PA412	NM_014351.3|NP_055166.1|C|S|126|coding-synonymous|A|S|126	CTCTTGGTGGGGACTCATCTCGGGAGGCAGAGGAGGTGCCAGCTTACCTT[G/T]GAGTCTCCATTGTGGAGGTCAGAGGGCAGAAAGCGGTAGGGCAGGTGGCT
992	AM_12316	ARSA_c.1172C>G(T391S)	rs743616	snp	N	22	51064039	A // B	G // C	N/A	-	-	ARSA	PA25005	NM_000487.4|NP_000478.2|C|T|391|coding-nonsynonymous|G|S|391	TCCACGGGGAGGGGTTACCCTGGGTGAAGAAGTGAGCCTTGTACTTTCCA[C/G]TCCGCACAGCAAAAACCCCACGGACCTCGTCTGGGTAGGACGGGTAGAAG
993	AM_12317	ARSA_c.1066T>G(F356V)	rs6151422	snp	N	22	51064399	A // B	T // G	N/A	-	-	ARSA	PA25005	NM_000487.4|NP_000478.2|T|F|356|coding-nonsynonymous|G|V|356	GGTCACCGGCCCTACCTTGCCTGTGCCCAGCAGCAGGGGGCTGAGGTCAA[A/C]GCCATCCAAGGTGACATTGGGCAGTGGGGCCCCAGCCAGGGCTGCCAGGG
994	AM_12319	ARSA_c.856A>C(T286P)	rs28940894	snp	N	22	51064699	A // B	C // A	N/A	-	-	ARSA	PA25005	NM_000487.4|NP_000478.2|A|T|286|coding-nonsynonymous|C|P|286	CTTTCCACACCGCAAGAGACCGGAGCAGCCGCCTCGGGACATACGCATGG[G/T]CTCAGGTCTGGGACACAGGAGGCGCTCATGAGCCATGGAGCCACAGCCTC
995	AM_12321	ARSA_c.245C>T(P82L)	rs6151411	snp	N	22	51065808	A // B	C // T	N/A	-	-	ARSA	PA25005	NM_000487.4|NP_000478.2|C|P|82|coding-nonsynonymous|T|L|82	GGGACTCTGTGACTTGTCCCGCAGGGCCGCCCTCCTGACCGGCCGGCTCC[C/T]GGTTCGGATGGGCATGTACCCTGGCGTCCTGGTGCCCAGCTCCCGGGGGG
996	AM_12322	ARSA_c.-1953C>T	rs131713	snp	N	22	51068560	A // B	C // T	N/A	-	-	ARSA	PA25005	NM_000487.4|||||mrna-utr|||	CAGTTTTCAGTTCAGGGACCCACAGCAAAGTCTGTCTAACTAGACGCATC[C/T]GATCAGAGCTGCAAAACTGACTAGCCTGCAGGACGGCCCCAAGACGGGGT
997	AM_12323	SLC5A6_c.*699A>G	rs7081	snp	N	2	27422605	A // B	G // A	N/A	-	-	SLC5A6	PA379	NM_021095.2|||||mrna-utr|||	GCAGCCTGGCTCAGGAGTCAGGTAGATAGATGGCTGCTCCACAGTGGACC[C/T]GGTCATGGCCCTGGTTTCTTGGATCCACATTTGCCCCGTCTCTTAAGTGT
998	AM_12326	SLC5A6_c.1475G>A(S492N)	rs1064845	snp	N	2	27424603	A // B	A // G	N/A	-	-	SLC5A6	PA379	NM_021095.2|NP_066918.2|G|S|492|coding-nonsynonymous|A|N|492	CGTGACCAGCATGGGCTCCAGCATGCCACCCTCTCCCTCTAATGGGTCCA[A/G]CTTCTCCCTGCCCACCAATCTAACCGTTGCCACTGTGACCACACTGATGC
999	AM_12327	SLC5A6_c.1442T>C(F481S)	rs1395	snp	N	2	27424636	A // B	T // C	N/A	-	-	SLC5A6	PA379	NM_021095.2|NP_066918.2|T|F|481|coding-nonsynonymous|C|S|481	TGGTGGGCAGGGAGAAGCTGGACCCATTAGAGGGAGAGGGTGGCATGCTG[A/G]AGCCCATGCTGGTCACGATGCTCCCGATGCCAATCCAGAAGGCCATGACG
1000	AM_12331	SLC5A6_c.1326C>T(F442F)	rs4327199	snp	N	2	27424892	A // B	T // C	N/A	-	-	SLC5A6	PA379	NM_021095.2|NP_066918.2|C|F|442|coding-synonymous|T|F|442	GATGCATCACTCACAGGAGGGTTAGCACATGGAAAGAACATTCCAAGGCA[A/G]AAGAGTCCCAGCAGCGGTCCCCCAACCATGCCAAAGATGCTGATTGCTGC
1001	AM_12335	SLC5A6_c.932T>C(I311T)	rs1275523	snp	N	2	27427402	A // B	T // C	N/A	-	-	SLC5A6	PA379	NM_021095.2|NP_066918.2|T|I|311|coding-nonsynonymous|C|T|311	GCTGAATGCTCATGGGATACTCCTGGTAATACGCGAACATGACCAGGCCA[A/G]TGAGGCAGCCCACGCAGAGGGACACCTGCTGGAAGGGGAACACTGCATAA
1002	AM_12337	SLC5A6_c.657C>T(I219I)	rs1275524	snp	N	2	27428295	A // B	C // T	N/A	-	-	SLC5A6	PA379	NM_021095.2|NP_066918.2|C|I|219|coding-synonymous|T|I|219	GATGTGTTCCAGACACTGGTCATGTTCCTCGGGCAGCTGGCAGTTATCAT[C/T]GTGGGGTCAGCCAAGGTGGGCGGCTTGGGGCGTGTGTGGGCCGTGGCTTC
1003	AM_12342	SLC5A6_c.282A>G(R94R)	rs56970590	snp	N	2	27430237	A // B	A // G	N/A	-	-	SLC5A6	PA379	NM_021095.2|NP_066918.2|A|R|94|coding-synonymous|G|R|94	ACCTTCCAGTCAGCCGTGGCCATCCTGGGTGTGCCGTCAGAGATCTACCG[A/G]TTTGGGACCCAATATTGGTTCCTGGGCTGCTGCTACTTTCTGGGGCTGCT
1004	AM_12358	XDH_c.3953G>A(C1318Y)	rs2295474	snp	N	2	31558873	A // B	G // A	N/A	-	-	XDH	PA37404	NM_000379.3|NP_000370.2|G|C|1318|coding-nonsynonymous|A|Y|1318	TTTAGACCCTCACAGACCAGGGTTTGCAGTTTTCTGGGACACCAGTGACA[C/T]ACTAGGAAGGAATGATAGTGTTCTCATTGCCAGGGTCTGCTGATCATGCT
1005	AM_12361	XDH_c.3717G>A(E1239E)	rs207440	snp	N	2	31562412	A // B	A // G	N/A	-	-	XDH	PA37404	NM_000379.3|NP_000370.2|G|E|1239|coding-synonymous|A|E|1239	CGTGGCCCTAGCACCTACAAGATCCCGGCATTTGGCAGCATCCCCATTGA[A/G]TTCAGGGTGTCCCTGCTCCGCGACTGCCCCAACAAGAAGGCCATCTATGC
1006	AM_12364	XDH_c.3449C>G(P1150R)	rs1042036	snp	N	2	31565119	A // B	C // G	N/A	-	-	XDH	PA37404	NM_000379.3|NP_000370.2|C|P|1150|coding-nonsynonymous|G|R|1150	TCCCAGAACACCCAATCTGGGCTACAGCTTTGAGACTAACTCAGGGAACC[C/G]CTTCCACTACTTCAGCTATGGGGTGGCTTGCTCTGAAGTAGAAATCGACT
1007	AM_12370	XDH_c.3030C>T(F1010F)	rs1884725	snp	N	2	31571786	A // B	C // T	N/A	-	-	XDH	PA37404	NM_000379.3|NP_000370.2|C|F|1010|coding-synonymous|T|F|1010	TGGAAAAAGAGAGGATTGTGCATAATTCCCACCAAGTTTGGAATAAGCTT[C/T]ACAGTTCCTTTTCTGAATCAGGTAATTGCTTTATAGAATTGTGTCCATCT
1008	AM_12372	XDH_c.2729C>A(T910K)	rs669884	snp	N	2	31572992	A // B	A // C	N/A	-	-	XDH	PA37404	NM_000379.3|NP_000370.2|C|T|910|coding-nonsynonymous|A|K|910	CAACATCCGGGGCACTGGGCGGCTGTGCAAAACCAACCTTCCCTCCAACA[A/C]GGCCTTCCGGGGCTTTGGGGGGCCCCAGGGGATGCTCATTGCCGAGTGCT
1009	AM_12373	XDH_c.2727C>A(N909K)	rs566362	snp	N	2	31572994	A // B	C // A	N/A	-	-	XDH	PA37404	NM_000379.3|NP_000370.2|C|N|909|coding-nonsynonymous|A|K|909	CACTCGGCAATGAGCATCCCCTGGGGCCCCCCAAAGCCCCGGAAGGCCGT[G/T]TTGGAGGGAAGGTTGGTTTTGCACAGCCGCCCAGTGCCCCGGATGTTGGG
1010	AM_12385	XDH_c.2211C>T(I737I)	rs2295475	snp	N	2	31589847	A // B	C // T	N/A	-	-	XDH	PA37404	NM_000379.3|NP_000370.2|C|I|737|coding-synonymous|T|I|737	ATTGGGCTCACTGTGAGGGATCTCACTGCTTCCCCAGGGGAGATATACAT[C/T]GGTGGCCAAGAGCACTTCTACCTGGAGACTCACTGCACCATTGCTGTTCC
1011	AM_12414	XDH_c.837C>T(V279V)	rs4407290	snp	N	2	31606670	A // B	T // C	N/A	-	-	XDH	PA37404	NM_000379.3|NP_000370.2|C|V|279|coding-synonymous|T|V|279	CCGTCGGGTCCATGTTCTACCGAATTCAGCTCAGGGATCCAGGCTGGGCA[A/G]ACAATCATAGGAAACAGCATATTCTTGAACTTCATCTCAATGCCTAGAGA
1012	AM_12447	CYP1B1_c.1616A>GorAG(K539RorX)	rs72549371	in-del	N	2	38297881	A // B // C	G // AG // A	N/A	-	-	CYP1B1	PA27094	NM_000104.3|NP_000095.2|A|K|539|coding-nonsynonymous|G|R|539	AATATTTCTAAAATTTCAGCTTGCCTCTTGCTTCTTATTGGCAAGTTTCC[C/CT/T]TGGCTTGTAAATTTTGGACAGCACTATCAAGGAGCTCCATGGACTCTCTG
1013	AM_12451	CYP1B1_4435del25	rs72549374	in-del	N	2	38298070	A // B	- // GGCGGTGCATTGGCGAAGAACTTTC	N/A	-	-	CYP1B1	PA27094	NM_000104.3|NP_000095.2|GGCGGTGCATTGGCGAAGAACTTTC|RRCIGEELS|468|coding-nonsynonymous|-|X|468	CATCAACAAGGACCTGACCAGCAGAGTGATGATTTTTTCAGTGGGCAAAA[-/GGCGGTGCATTGGCGAAGAACTTTC]TAAGATGCAGCTTTTTCTCTTCATCTCCATCCTGGCTCACCAGTGCGATT
1014	AM_12452	CYP1B1*25_4437C>T(R469W)	rs28936701	snp	N	2	38298092	A // B	C // T	N/A	-	-	CYP1B1	PA27094	NM_000104.3|NP_000095.2|C|R|469|coding-nonsynonymous|T|W|469	TCAACAAGGACCTGACCAGCAGAGTGATGATTTTTTCAGTGGGCAAAAGG[C/T]GGTGCATTGGCGAAGAACTTTCTAAGATGCAGCTTTTTCTCTTCATCTCC
1015	AM_12453	CYP1B1_4424A>T(S464S)	rs4986889	snp	N	2	38298105	A // B // C	T // G // A	N/A	-	-	CYP1B1	PA27094	NM_000104.3|NP_000095.2|A|S|464|coding-synonymous|T|S|464	AAAAGCTGCATCTTAGAAAGTTCTTCGCCAATGCACCGCCTTTTGCCCAC[A/C/T]GAAAAAATCATCACTCTGCTGGTCAGGTCCTTGTTGATGAGGCCATCCTT
1016	AM_12454	CYP1B1*4_4390A>G(N453S)	rs1800440	snp	N	2	38298139	A // B	A // G	N/A	-	-	CYP1B1	PA27094	NM_000104.3|NP_000095.2|A|N|453|coding-nonsynonymous|G|S|453	CCCGGAGAACTTTGATCCAGCTCGATTCTTGGACAAGGATGGCCTCATCA[A/G]CAAGGACCTGACCAGCAGAGTGATGATTTTTTCAGTGGGCAAAAGGCGGT
1017	AM_12455	CYP1B1_4379C>TorA(D449DorE)	rs1056837	snp	N	2	38298150	A // B // C	A // C // T	N/A	-	-	CYP1B1	PA27094	NM_000104.3|NP_000095.2|C|D|449|coding-synonymous|T|D|449	AAGTGGCCTAACCCGGAGAACTTTGATCCAGCTCGATTCTTGGACAAGGA[A/C/T]GGCCTCATCAACAAGGACCTGACCAGCAGAGTGATGATTTTTTCAGTGGG
1018	AM_12456	CYP1B1*24_4377delG(D449X)	rs72549375	in-del	N	2	38298152	A // B	- // G	N/A	-	-	CYP1B1	PA27094	NM_000104.3|NP_000095.2|G|D|449|coding-nonsynonymous|-|X|449	TGAAGTGGCCTAACCCGGAGAACTTTGATCCAGCTCGATTCTTGGACAAG[-/G]ATGGCCTCATCAACAAGGACCTGACCAGCAGAGTGATGATTTTTTCAGTG
1019	AM_12458	CYP1B1*7_4360C>G(A443G)	rs4986888	snp	N	2	38298169	A // B	C // G	N/A	-	-	CYP1B1	PA27094	NM_000104.3|NP_000095.2|C|A|443|coding-nonsynonymous|G|G|443	TGTGAATCATGACCCAGTGAAGTGGCCTAACCCGGAGAACTTTGATCCAG[C/G]TCGATTCTTGGACAAGGATGGCCTCATCAACAAGGACCTGACCAGCAGAG
1020	AM_12460	CYP1B1*23_4342C>T(P437L)	rs56175199	snp	N	2	38298187	A // B	T // C	N/A	-	-	CYP1B1	PA27094	NM_000104.3|NP_000095.2|C|P|437|coding-nonsynonymous|T|L|437	TGTTGATGAGGCCATCCTTGTCCAAGAATCGAGCTGGATCAAAGTTCTCC[A/G]GGTTAGGCCACTTCACTGGGTCATGATTCACAGACCACTGGTTGACAAAA
1021	AM_12461	CYP1B1*3_4326C>G(L432V)	rs1056836	snp	N	2	38298203	A // B	C // G	N/A	-	-	CYP1B1	PA27094	NM_000104.3|NP_000095.2|C|L|432|coding-nonsynonymous|G|V|432	CCAAGGACACTGTGGTTTTTGTCAACCAGTGGTCTGTGAATCATGACCCA[C/G]TGAAGTGGCCTAACCCGGAGAACTTTGATCCAGCTCGATTCTTGGACAAG
1022	AM_12462	CYP1B1_4231del10	rs72549377	in-del	N	2	38298288	A // B	- // TCATGCCACC	N/A	-	-	CYP1B1	PA27094	NM_000104.3|NP_000095.2|TCATGCCACC|THAT|403||||403	TTCCTTTATGAAGCCATGCGCTTCTCCAGCTTTGTGCCTGTCACTATTCC[-/TCATGCCACC]ACTGCCAACACCTCTGTCTTGGGCTACCACATTCCCAAGGACACTGTGGT
1023	AM_12465	CYP1B1*21_4201G>A(R390H)	rs56010818	snp	N	2	38298328	A // B	G // A	N/A	-	-	CYP1B1	PA27094	NM_000104.3|NP_000095.2|G|R|390|coding-nonsynonymous|A|H|390	TGTTGGCAGTGGTGGCATGAGGAATAGTGACAGGCACAAAGCTGGAGAAG[C/T]GCATGGCTTCATAAAGGAAGGCCAGGACATAGGGCAGGTTGGGCTGGTCA
1024	AM_12466	CYP1B1*20_4191G>A(E387K)	rs55989760	snp	N	2	38298338	A // B	G // A	N/A	-	-	CYP1B1	PA27094	NM_000104.3|NP_000095.2|G|E|387|coding-nonsynonymous|A|K|387	GGTGGCATGAGGAATAGTGACAGGCACAAAGCTGGAGAAGCGCATGGCTT[C/T]ATAAAGGAAGGCCAGGACATAGGGCAGGTTGGGCTGGTCACCCATACAAG
1025	AM_12467	CYP1B1*19_4168C>T(P379L)	rs56305281	snp	N	2	38298361	A // B	T // C	N/A	-	-	CYP1B1	PA27094	NM_000104.3|NP_000095.2|C|P|379|coding-nonsynonymous|T|L|379	GCACAAAGCTGGAGAAGCGCATGGCTTCATAAAGGAAGGCCAGGACATAG[A/G]GCAGGTTGGGCTGGTCACCCATACAAGGCAGACGGTCCCTCCCCACGACC
1026	AM_12469	CYP1B1_4146A>G(M372V)	rs4398252	snp	N	2	38298383	A // B	G // A	N/A	-	-	CYP1B1	PA27094	NM_000104.3|NP_000095.2|A|M|372|coding-nonsynonymous|G|V|372	GGCTTCATAAAGGAAGGCCAGGACATAGGGCAGGTTGGGCTGGTCACCCA[C/T]ACAAGGCAGACGGTCCCTCCCCACGACCTGATCCAATTCTGCCTGCACTC
1027	AM_12471	CYP1B1*18_4125G>T(G365W)	rs55771538	snp	N	2	38298404	A // B	T // G	N/A	-	-	CYP1B1	PA27094	NM_000104.3|NP_000095.2|G|G|365|coding-nonsynonymous|T|W|365	GACATAGGGCAGGTTGGGCTGGTCACCCATACAAGGCAGACGGTCCCTCC[A/C]CACGACCTGATCCAATTCTGCCTGCACTCGAGTCTGCACATCAGGATACC
1028	AM_12473	CYP1B1*17_4096del13(RVQAE355X)	rs72549380	in-del	N	2	38298421	A // B	- // GAGTGCAGGCAGA	N/A	-	-	CYP1B1	PA27094	NM_000104.3|NP_000095.2|GAGTGCAGGCAGA|RVQAE|355|coding-nonsynonymous|-|X|355	TTTTCTCTCTCCACATTAAACACCAAACAGGTATCCTGATGTGCAGACTC[-/GAGTGCAGGCAGA]ATTGGATCAGGTCGTGGGGAGGGACCGTCTGCCTTGTATGGGTGACCAGC
1029	AM_12474	CYP1B1_4095C>T(R355X)	rs72549381	snp	N	2	38298434	A // B	C // T	N/A	-	-	CYP1B1	PA27094	NM_000104.3|NP_000095.2|C|R|355|coding-nonsynonymous|T|X|355	CTTTTCTCTCTCCACATTAAACACCAAACAGGTATCCTGATGTGCAGACT[C/T]GAGTGCAGGCAGAATTGGATCAGGTCGTGGGGAGGGACCGTCTGCCTTGT
1030	AM_12493	CYP1B1*12_182G>A(G61E)	rs28936700	snp	N	2	38302350	A // B	G // A	N/A	-	-	CYP1B1	PA27094	NM_000104.3|NP_000095.2|G|G|61|coding-nonsynonymous|A|E|61	CCAGGCGAGCGAACGAGAGGTGAGCCGCCTGGCCCACCGCCGCCGCGTTT[C/T]CGATCAGTGGCCACGCAAACGGGCCCGGGGGCGCGGACCGGAGCTGCCGC
1031	AM_12498	CYP1B1_81G>C(L27L)	rs4987135	snp	N	2	38302451	A // B	C // G	N/A	-	-	CYP1B1	PA27094	NM_000104.3|NP_000095.2|G|L|27|coding-synonymous|C|L|27	TGGCCGCTAAACCCGCTGTCCATCCAGCAGACCACGCTCCTGCTACTCCT[C/G]TCGGTGCTGGCCACTGTGCATGTGGGCCAGCGGCTGCTGAGGCAACGGAG
1032	AM_12521	CHST10_c.*758G>A	rs4149522	snp	N	2	101008949	A // B	G // A	N/A	-	-	CHST10	PA134920179	NM_004854.3|||||mrna-utr|||	CCATTCCTGGGCCATGGTCCTTTTAAGGCCCTCAAAGACACTCCCCTTCT[C/T]AGGTAGAAAAAGCCTCCCCTCCCCTCACCTTCTAAAATCGTATGTCTTGT
1033	AM_12522	CHST10_c.*625G>A	rs1057056	snp	N	2	101009082	A // B	A // G	N/A	-	-	CHST10	PA134920179	NM_004854.3|||||mrna-utr|||	TGTTCCTGTAGACAGTCAGCGATGGCCAGAGGGTGGTGTGGTGTCCAGGG[A/G]TCCATCTTTCCAGAATCCATGCCTGTGTAATGCTGGTCCATGCTTCTGAA
1034	AM_12523	CHST10_c.*381G>A	rs1530031	snp	N	2	101009326	A // B	G // A	N/A	-	-	CHST10	PA134920179	NM_004854.3|||||mrna-utr|||	GAGTCCTGGGTGCTGTTCCTGCAACCCACCAGTGATGGGTGAAGCCACCC[C/T]GACTAGCCAGGAGAACCTCAGGGGCATCCCCTTCCTTAACACCTGAAGGA
1035	AM_12524	CHST10_c.*331T>C	rs1057055	snp	N	2	101009376	A // B	C // T	N/A	-	-	CHST10	PA134920179	NM_004854.3|||||mrna-utr|||	AGTTTGACAGCCCAGCAGGGAGGAAGCATCACACAGCGTTAGGAGCCGTT[C/T]CCTTCAGGTGTTAAGGAAGGGGATGCCCCTGAGGTTCTCCTGGCTAGTCA
1036	AM_12526	CHST10_c.*107C>T	rs1530030	snp	N	2	101009600	A // B	C // T	N/A	-	-	CHST10	PA134920179	NM_004854.3|||||mrna-utr|||	GATCTGAGCCCAGAAATGACCCTTCCTCCACCACACCCCTCCTTTGAGGA[C/T]GCCCGGGGTCTCCCACAGGCCTGTGAGTTGCCTCGGCATATGACGCAGAA
1037	AM_12527	CHST10_c.*39T>C	rs4149521	snp	N	2	101009668	A // B	C // T	N/A	-	-	CHST10	PA134920179	NM_004854.3|||||mrna-utr|||	TTGCTAAACTAATGCATAAGACCTATGAATTCAAATATCTTTATTAGACC[C/T]GGGGCTAACCAGGTGAAGATCTGAGCCCAGAAATGACCCTTCCTCCACCA
1038	AM_12528	CHST10_c.870C>T(A290A)	rs3748934	snp	N	2	101009908	A // B	C // T	N/A	-	-	CHST10	PA134920179	NM_004854.3|NP_004845.1|C|A|290|coding-synonymous|T|A|290	GAGATAATGTACAGTGTGATTGGACACCACGAGACCCTGGAGGACGATGC[C/T]CCATACATCTTAAAAGAGGCTGGCATTGACCACCTGGTGTCATACCCGAC
1039	AM_12529	CHST10_c.795G>A(T265T)	rs3748933	snp	N	2	101009983	A // B	A // G	N/A	-	-	CHST10	PA134920179	NM_004854.3|NP_004845.1|G|T|265|coding-synonymous|A|T|265	CACAGATGGCTAGACCTTCAGTTTGGGGACCACATCATTCACTGGGTGAC[A/G]TATGTAGAGCTCTGTGCTCCCTGTGAGATAATGTACAGTGTGATTGGACA
1040	AM_12530	CHST10_c.772G>A(D258N)	rs3748932	snp	N	2	101010006	A // B	A // G	N/A	-	-	CHST10	PA134920179	NM_004854.3|NP_004845.1|G|D|258|coding-nonsynonymous|A|N|258	TGCGCTACCTCGGCGATCCGAACCACAGATGGCTAGACCTTCAGTTTGGG[A/G]ACCACATCATTCACTGGGTGACGTATGTAGAGCTCTGTGCTCCCTGTGAG
1041	AM_12531	CHST10_c.735C>T(G245G)	rs3748931	snp	N	2	101010043	A // B	C // T	N/A	-	-	CHST10	PA134920179	NM_004854.3|NP_004845.1|C|G|245|coding-synonymous|T|G|245	CGGACAGAGACCCGGGGGATCCAGTTTGAAGATTTCGTGCGCTACCTCGG[C/T]GATCCGAACCACAGATGGCTAGACCTTCAGTTTGGGGACCACATCATTCA
1042	AM_12532	CHST10_c.696G>C(T232T)	rs3748930	snp	N	2	101010082	A // B	C // G	N/A	-	-	CHST10	PA134920179	NM_004854.3|NP_004845.1|G|T|232|coding-synonymous|C|T|232	GAGATTGCTCCTGGCATCATCAGAAAATACAGGAGGAACCGGACAGAGAC[C/G]CGGGGGATCCAGTTTGAAGATTTCGTGCGCTACCTCGGCGATCCGAACCA
1043	AM_12533	CHST10_c.444T>C(I148I)	rs4149520	snp	N	2	101012060	A // B	C // T	N/A	-	-	CHST10	PA134920179	NM_004854.3|NP_004845.1|T|I|148|coding-synonymous|C|I|148	AGCCAACCTGCCTTCCTTTCCGTTTACTTCCCAGGAGCATTTTCTTCCAT[C/T]GAGGAGATCCCCGAAAACGTGGTGCACGACCACGAGAAGAACGGCCTTCC
1044	AM_12534	CHST10_c.187C>T(L63L)	rs1465829	snp	N	2	101019031	A // B	T // C	N/A	-	-	CHST10	PA134920179	NM_004854.3|NP_004845.1|C|L|63|coding-synonymous|T|L|63	GTGCCGTGTTCAAGAGGACAAGGACCACGGCCTGGCTGTGCCCACCTTCA[A/G]TTCCTCAGGAATGTGCTTCTCTTCTGGCAACTTCCTCACTTCCGGCATGG
1045	AM_12535	CHST10_c.-91C>A	rs3828193	snp	N	2	101031561	A // B	A // C	N/A	-	-	CHST10	PA134920179	NM_004854.3|||||mrna-utr|||	TTTAATAATGCTTTTTTTTTTTTAATTTTCCTATCCAGTGACAAGAGGAA[A/C]CAAGAACCTCAGTTCAGGGGAAACACAGCAAGGAAATGTGAGCCCCAGGC
1046	AM_12557	SULT1C2_c.179A>C(D60A)	rs72549391	snp	N	2	108910712	A // B	A // C	N/A	+	+	SULT1C2	PA345	NM_001056.3|NP_001047.1|A|D|60|coding-nonsynonymous|C|A|60	CATCCTTCCTTTCTGAGCCTCAGGGACAACGTGGATTCAGGAAATTGTGG[A/C]TATGATTGAACAGAATGGGGACGTGGAGAAGTGCCAGCGAGCCATCATCC
1047	AM_12560	SULT1C2_c.218G>A(R73Q)	rs17036058	snp	N	2	108910751	A // B	G // A	N/A	+	+	SULT1C2	PA345	NM_001056.3|NP_001047.1|G|R|73|coding-nonsynonymous|A|Q|73	GGGGTGGCCGAGCCCACTCAATGAAAGGATGGCGGTGTTGGATGATGGCT[C/T]GCTGGCACTTCTCCACGTCCCCATTCTGTTCAATCATATCCACAATTTCC
1048	AM_12568	SULT1C2_c.332C>T(S111F)	rs72549392	snp	N	2	108917348	A // B	C // T	N/A	+	+	SULT1C2	PA345	NM_001056.3|NP_001047.1|C|S|111|coding-nonsynonymous|T|F|111	GGAAAAAGCCAAAGCAATGCCCTCTCCACGGATACTAAAGACTCACCTTT[C/T]CACTCAGCTGCTGCCACCGTCTTTCTGGGAAAACAACTGCAAGGTAAGAT
1049	AM_12574	SULT1C2_c.763T>G(S255A)	rs17036104	snp	N	2	108922036	A // B	G // T	N/A	+	+	SULT1C2	PA345	NM_001056.3|NP_001047.1|T|S|255|coding-nonsynonymous|G|A|255	TGACAAATCGTTCTACAGTTTCCAAATCTATCTTGGACCAGTCAATTTCC[G/T]CCTTCATGAGAAAAGGTGTGTGGGGCCTCTTTATCATACATTCAGATTGT
1050	AM_12577	SULT1C2_c.*157A>T	rs14700	snp	N	2	108925077	A // B	T // A	N/A	+	+	SULT1C2	PA345	NM_001056.3|||||mrna-utr|||	GGAAAGAATAGTTGGGAAAATGGGCATTAGACGTGATCCTTTTTAAAAAA[A/T]GAAGTGGTGACATACTGTTAATCATCACAGAGATTGTTTGTACTACATTG
1051	AM_12578	SULT1C2_c.*264A>T	rs1047309	snp	N	2	108925184	A // B	A // T	N/A	+	+	SULT1C2	PA345	NM_001056.3|||||mrna-utr|||	AGATATAAGGTAGCTTAATAAACTAAGTAAAACGTATGACTTGAGTACAA[A/T]AGGATTGTTTTAATCCCCATTATTCTGGAAAGTGCATCCTAGTCTCCCAG
1052	AM_12579	SULT1C2_c.*300A>G	rs3731680	snp	N	2	108925220	A // B	G // A	N/A	+	+	SULT1C2	PA345	NM_001056.3|||||mrna-utr|||	TTTGGACTTATACTCAAGGTATTATGATGTTATAGACTGGGAGACTAGGA[C/T]GCACTTTCCAGAATAATGGGGATTAAAACAATCCTTTTGTACTCAAGTCA
1053	AM_12580	SULT1C2_c.*829G>C	rs1047310	snp	N	2	108925749	A // B	C // G	N/A	+	+	SULT1C2	PA345	NM_001056.3|||||mrna-utr|||	GTGAGGTGTTCTTTTCCCTTGCTTCCCATATTTGTCCCAGTTGCAGCCCT[C/G]TTGTTATGTATTTACTCTTCAATTTCTTATTTATACCTCTCACTCAATTG
1054	AM_12581	SULT1C2_c.*832G>C	rs1047311	snp	N	2	108925752	A // B	C // G	N/A	+	+	SULT1C2	PA345	NM_001056.3|||||mrna-utr|||	AGGTGTTCTTTTCCCTTGCTTCCCATATTTGTCCCAGTTGCAGCCCTGTT[C/G]TTATGTATTTACTCTTCAATTTCTTATTTATACCTCTCACTCAATTGTTA
1055	AM_12586	SULT1C4_c.-1075G>A	rs3754926	snp	N	2	108993719	A // B	G // A	N/A	+	+	SULT1C4	PA414	NM_006588.2|NP_006579.2||||locus-region|||	TTGTGTGTCTGGCTGTCTGATTCTCTTTCTTCGTGTCCCAGCTTTGATGC[C/T]CCCTTTCTGGAGAAGCCTTCTTTGACTTTCTATGTCATCTCAAGTAGGTC
1056	AM_12587	SULT1C4_c.-489A>G	rs6739225	snp	N	2	108994305	A // B	G // A	N/A	+	+	SULT1C4	PA414	NM_006588.2|NP_006579.2||||locus-region|||	GGCGGTCACAAACCCTGCTGGCTGGGTCCCGTTCCAGCCCTTCCGTTCTC[C/T]GTGAGTTAACAGGACATAGTATCACATTGTTTATAGCTCTCATGTCTGTG
1057	AM_12588	SULT1C4_c.-483C>T	rs4149430	snp	N	2	108994311	A // B	C // T	N/A	+	+	SULT1C4	PA414	NM_006588.2|NP_006579.2||||locus-region|||	CATGAGAGCTATAAACAATGTGATACTATGTCCTGTTAACTCACAGAGAA[C/T]GGAAGGGCTGGAACGGGACCCAGCCAGCAGGGTTTGTGACCGCCTCTGCT
1058	AM_12589	SULT1C4_c.-62G>A	rs11569697	snp	N	2	108994732	A // B	A // G	N/A	+	+	SULT1C4	PA414	NM_006588.2|||||mrna-utr|||	GCTGGATAGTGTGGTAGTGTGGTGGATAGAGTGCTGCCTCTATCCACAAC[A/G]CAGCCATATGCTGACTGAAGATAACTTTGTGTCTGGAAGAGCCCTCTGAT
1059	AM_12590	SULT1C4_c.15C>G(D5E)	rs1402467	snp	N	2	108994808	A // B	C // G	N/A	+	+	SULT1C4	PA414	NM_006588.2|NP_006579.2|C|D|5|coding-nonsynonymous|G|E|5	TTTGTGTCTGGAAGAGCCCTCTGATTTCTTACACTAATGGCCTTACACGA[C/G]ATGGAGGATTTTACATTTGATGGAACAAAGCGCTTAAGTGTCAACTACGT
1060	AM_12591	SULT1C4_c.394-124A>G	rs13032083	snp	N	2	108999425	A // B	A // G	N/A	+	+	SULT1C4	PA414	NM_006588.2|NP_006579.2||||intron|||	AAAAAAAAAAAAAGTCTCCCATAACCAGGATGACAAGAATGCAGCCTCAG[A/G]AAAAATGAACTGTATGAAATGTATCTACCCTAACATGACTTGCCTGGGCA
1061	AM_12592	SULT1C4_c.615+1329A>C	rs6710340	snp	N	2	109001295	A // B	A // C	N/A	+	+	SULT1C4	PA414	NM_006588.2|NP_006579.2||||intron|||	TCTATACAGAATTACAGTGTCTGTTCTTGAATTGGTCGTTGAAAGCCTTG[A/C]TACTCAACAGGTGCTTCACAGACTAGTTGCATGAGCTACTGGAGCCTGCT
1062	AM_12629	HNMT_c.388delA(K130X)	rs72549393	in-del	N	2	138759723	A // B	- // A	N/A	+	+	HNMT	PA190	NM_006895.2|NP_008826.1|A|K|130|coding-nonsynonymous|-|X|130	ATTTCTTACTTGAATCATATGAATAAAGTCCCACTTTTGAAGCTCCTTTT[-/T]CTCCAACATTCTACTTTGGTATTCAGATGATGTCTCCTTATGCCAAGCAA
1063	AM_12642	HNMT_c.700A>G(N234D)	rs17851810	snp	N	2	138771521	A // B	G // A	N/A	+	+	HNMT	PA190	NM_006895.2|NP_008826.1|A|N|234|coding-nonsynonymous|G|D|234	AAAGTTGCAGGTTTCAGTCAAAAAATCCCAAAGCAGGTCTCCATTTTCAT[C/T]ACCATCAATAAAGCAGTCAGATATATCCATGGTGGACAAAAGGTCATAGC
1064	AM_12643	HNMT_c.*60A>G	rs1050891	snp	N	2	138771760	A // B	G // A	N/A	+	+	HNMT	PA190	NM_006895.2|||||mrna-utr|||	ACAGTGCTTTATCTACATTAATGGATGAGTTTGTGATTTTAATATGGAAA[C/T]AAATGAGTGATTCGAGTTGTTCAAAATATAATTTTTGAATATACTTTTGT
1065	AM_12645	HNMT_c.*635G>C	rs16840132	snp	N	2	138772335	A // B	C // G	N/A	+	+	HNMT	PA190	NM_006895.2|||||mrna-utr|||	CTTTTTGTTTGTCTTTTTGATATACTGAAGTTTTCTATTATATTCAGCCA[C/G]ATTTTTTTTTAAGTCTCGGCTTCTGATACATTTTAAAAGACCTTCTAAAA
1066	AM_12646	HNMT_c.*994C>T	rs4245861	snp	N	2	138772694	A // B	C // T	N/A	+	+	HNMT	PA190	NM_006895.2|||||mrna-utr|||	TTCAATGCATTTTGATACTTTATAGTTTCTTATGTCACTCTCAAGAACTC[C/T]TATAAGACCAAGAGTCATCTTTGGACTGTAGGATTTCAGGGGGGTTTTGA
1067	AM_12647	HNMT_c.*1529G>A	rs4646333	snp	N	2	138773229	A // B	A // G	N/A	+	+	HNMT	PA190	NM_006895.2|||||mrna-utr|||	AAATGAAACGACAGTTATCCAATCAGATTCCTGAAAATGAACACTGAACC[A/G]TTAATCATACTGATATGTACTACTGACAAAGGAAATCTGTGAGGCACACA
1068	AM_12655	ABCB11_c.*420A>G	rs496550	snp	N	2	169779712	A // B	A // G	N/A	-	-	ABCB11	PA374	NM_003742.2|||||mrna-utr|||	AGAGAACTGTCTTTCATTTTTGAACCCTCGGTGTACACAGAGGCGGGTCT[A/G]TAACAGGCAATCAACAAACGTTTCTTGAGCTAGACCAAGGTCAGATTTGA
1069	AM_12656	ABCB11_c.*368G>A	rs495714	snp	N	2	169779764	A // B	A // G	N/A	-	-	ABCB11	PA374	NM_003742.2|||||mrna-utr|||	GGGAATTAGTGAGACATCAGGGAGTAAGTGACACTTTGAACTCCTCAAGG[A/G]CAGAGAACTGTCTTTCATTTTTGAACCCTCGGTGTACACAGAGGCGGGTC
1070	AM_12657	ABCB11_c.*281T>G	rs3732038	snp	N	2	169779851	A // B	T // G	N/A	-	-	ABCB11	PA374	NM_003742.2|||||mrna-utr|||	TCTCACTAATTCCCACATATTAATCAGGACTGGCTCCTGCACAGAGAAGC[A/C]CTGAGTGGTGGCTGAGCTGCCACTTGACATTGGGTTTTCCCTCATATGGA
1071	AM_12658	ABCB11_c.*236G>A	rs473351	snp	N	2	169779896	A // B	A // G	N/A	-	-	ABCB11	PA374	NM_003742.2|||||mrna-utr|||	TAATTCTGCTTTAGATGTGTATACAGAAAATGAAAGAAACTAGGGTCCAT[A/G]TGAGGGAAAACCCAATGTCAAGTGGCAGCTCAGCCACCACTCAGTGCTTC
1072	AM_12660	ABCB11_c.3803G>A(R1268Q)	rs72549394	snp	N	2	169780295	A // B	G // A	N/A	-	-	ABCB11	PA374	NM_003742.2|NP_003733.2|G|R|1268|coding-nonsynonymous|A|Q|1268	TATCCGCGTTCTGGATGGTGGACAAGCGATGGGCAATGACAATGCAGGTC[C/T]GACCCTCTCTGGCTTTGTCTAGAGCAACCTGCACCGTCTGCAAAGAGAAG
1073	AM_12666	ABCB11_c.3556G>A(E1186K)	rs1521808	snp	N	2	169783728	A // B	A // G	N/A	-	-	ABCB11	PA374	NM_003742.2|NP_003733.2|G|E|1186|coding-nonsynonymous|A|K|1186	GCATAATGGACAATATCAAGTATGGAGACAACACCAAAGAAATTCCCATG[A/G]AAAGAGTCATAGCAGCTGCAAAACAGGCTCAGCTGCATGATTTTGTCATG
1074	AM_12667	ABCB11_c.3457C>T(R1153C)	rs72549395	snp	N	2	169783827	A // B	C // T	N/A	-	-	ABCB11	PA374	NM_003742.2|NP_003733.2|C|R|1153|coding-nonsynonymous|T|C|1153	GGCAGATGATAGATGGTCATGACAGCAAAAAAGTAAATGTCCAGTTCCTC[C/T]GCTCAAACATTGGAATTGTTTCCCAGGAACCAGTGTTGTTTGCCTGTAGC
1075	AM_12670	ABCB11_c.3268C>T(R1090X)	rs72549396	snp	N	2	169787318	A // B	C // T	N/A	-	-	ABCB11	PA374	NM_003742.2|NP_003733.2|C|R|1090|coding-nonsynonymous|T|X|1090	ACTTCCAGGGGAAGATTGATTTTGTTGATTGTAAATTTACATATCCTTCT[C/T]GACCTGACTCGCAAGTTCTGAATGGTCTCTCAGTGTCGATTAGTCCAGGG
1076	AM_12672	ABCB11_c.3169C>T(R1057X)	rs72549397	snp	N	2	169788931	A // B	C // T	N/A	-	-	ABCB11	PA374	NM_003742.2|NP_003733.2|C|R|1057|coding-nonsynonymous|T|X|1057	GTTATGCAAAAGCTAAAATATCAGCTGCACGCTTTTTTCAACTGCTGGAC[C/T]GACAACCCCCAATCAGTGTATACAATACTGCAGGTGAAAAATGGGTAAGT
1077	AM_12674	ABCB11_c.3084A>G(A1028A)	rs497692	snp	N	2	169789016	A // B	G // A	N/A	-	-	ABCB11	PA374	NM_003742.2|NP_003733.2|A|A|1028|coding-synonymous|G|A|1028	TTAGCTTTTGCATAACTTGGGGTGTAAGAGAAGGCTCTTCCAAGAGCTGT[C/T]GCACTCAGTACAACTGCAGAGATCACCCTGTAACCAGACAGACACACAGG
1078	AM_12677	ABCB11_c.2944G>A(G982R)	rs72549399	snp	N	2	169791806	A // B	G // A	N/A	-	-	ABCB11	PA374	NM_003742.2|NP_003733.2|G|G|982|coding-nonsynonymous|A|R|982	AGCAGAATTCGCAATAAACATGATGCACTGGGCAAAGGCAAAGCAGAATC[C/T]GTAAATATTGGCTTTCTGAATGGCTGTCTTGAAGGGCTTCTCCAGCTCAG
1079	AM_12688	ABCB11_c.2412A>G(A804A)	rs11568373	snp	N	2	169801403	A // B	G // A	N/A	-	-	ABCB11	PA374	NM_003742.2|NP_003733.2|A|A|804|coding-synonymous|G|A|804	ATAACATTTCTTACCTGTAGAAATTGGGTGAAAAGAGATACACAGCCCAT[C/T]GCTACAAAAAGTAGGCACACACCATTGATCTGTGACCTTTGTTCCTCTTT
1080	AM_12719	ABCB11_c.1723C>T(R575X)	rs72549401	snp	N	2	169826641	A // B	C // T	N/A	-	-	ABCB11	PA374	NM_003742.2|NP_003733.2|C|R|575|coding-nonsynonymous|T|X|575	AGATGAGTGGTGGCCAGAAACAAAGGGTAGCTATCGCCAGAGCCCTCATC[C/T]GAAATCCCAAGATTCTGCTTTTGGACATGGCCACCTCAGCTCTGGACAAT
1081	AM_12722	ABCB11_c.1445A>G(D482G)	rs72549402	snp	N	2	169828550	A // B	A // G	N/A	-	-	ABCB11	PA374	NM_003742.2|NP_003733.2|A|D|482|coding-nonsynonymous|G|G|482	AAGATTCCAAAAGTTGTGATGTTGTGCCCATGCTCTCTAGGTGACCGTGG[A/G]TGGCCATGACATTCGCTCTCTTAACATTCAGTGGCTTAGAGATCAGATTG
1082	AM_12726	ABCB11_c.1331C>T(A444V)	rs2287622	snp	N	2	169830328	A // B	T // C	N/A	-	-	ABCB11	PA374	NM_003742.2|NP_003733.2|C|A|444|coding-nonsynonymous|T|V|444	TTCCAGCTCCACTGGGTCCTACCAGAGCTGTCATTTCCCCTGGTTTAATG[A/G]CCATGTTGAGGTCATTTAGAATCTGGAGAAGAAAGAAAACAGCAAAGTTC
1083	AM_12739	ABCB11_c.957A>G(G319G)	rs7563233	snp	N	2	169842746	A // B	G // A	N/A	-	-	ABCB11	PA374	NM_003742.2|NP_003733.2|A|G|319|coding-synonymous|G|G|319	CACAAAAAGATGAGACACCACACGAATCCAGTAAAGAATCCCATCACTAT[C/T]CCTTTTCTAATTCCCCAACGCTGGGCGAACACAAGATTTTTCTCATACCT
1084	AM_12742	ABCB11_c.896G>A(R299K)	rs2287617	snp	N	2	169847323	A // B	A // G	N/A	-	-	ABCB11	PA374	NM_003742.2|NP_003733.2|G|R|299|coding-nonsynonymous|A|K|299	TGAAGTCATTTCATCAATGAGAACAGTGGCTGCTTTTGGTGGTGAGAAAA[A/G]AGAGGTTGAAAGGTTGGTTAATTGGAATCTGATTCTTTCCTTAATTTCAT
1085	AM_12744	ABCB11_c.807T>C(Y269Y)	rs2287616	snp	N	2	169847412	A // B	C // T	N/A	-	-	ABCB11	PA374	NM_003742.2|NP_003733.2|T|Y|269|coding-synonymous|C|Y|269	TTTTCTTTTCTTCTTTTTGATTTTTAGAGTGTGTCCAAGTTTACGGACTA[C/T]GAGCTGAAGGCCTATGCCAAAGCAGGGGTGGTGGCTGATGAAGTCATTTC
1086	AM_12749	ABCB11_c.713G>T(G238V)	rs72551306	snp	N	2	169850291	A // B	T // G	N/A	-	-	ABCB11	PA374	NM_003742.2|NP_003733.2|G|G|238|coding-nonsynonymous|T|V|238	CAATCCCAATGAGAGGGCTGACAGAAATAATAACCAAGGTCAGTTTCCAA[A/C]CCCTGAAAAATCCCAACAGGAAACCACAGATGGTCGAGGTCATGCGCTGA
1087	AM_12762	ABCB11_c.270T>C(F90F)	rs4148777	snp	N	2	169869901	A // B	C // T	N/A	-	-	ABCB11	PA374	NM_003742.2|NP_003733.2|T|F|90|coding-synonymous|C|F|90	ATAGCCCAGCCAGGCGTGCTACTCATTTTTGGCACAATGACAGATGTTTT[C/T]ATTGACTACGACGTTGAGTTACAAGAACTCCAGATTCCAGGAAAAGCATG
1088	AM_12766	ABCB11_c.108T>C(D36D)	rs3815675	snp	N	2	169870855	A // B	C // T	N/A	-	-	ABCB11	PA374	NM_003742.2|NP_003733.2|T|D|36|coding-synonymous|C|D|36	TGGAAAGGGTGGTCTTTAAATCCTTATGTTTTTCTCATCAGGTTACAAGA[C/T]GAGAAGAAAGGTGATGGCGTTAGAGTTGGCTTCTTTCAATTGGTAATAAA
1089	AM_12767	ABCB11_c.99-18T>C	rs4148776	snp	N	2	169870882	A // B	C // T	N/A	-	-	ABCB11	PA374	NM_003742.2|NP_003733.2||||intron|||	CCACCTAGGGAGAATTTCCCATTGTATTGGAAAGGGTGGTCTTTAAATCC[C/T]TATGTTTTTCTCATCAGGTTACAAGATGAGAAGAAAGGTGATGGCGTTAG
1090	AM_12771	ABCB11_c.-610C>A	rs3755162	snp	N	2	169875245	A // B	C // A	N/A	-	-	ABCB11	PA374	NM_003742.2|NP_003733.2||||intron|||	ACAGAGTCATGATTAGTCTTATTCACAGTGGAAAAATTAGTTTATAGAGG[G/T]TACAGGCTGAGAATTCCAGGATATAGACACTCGATTCAGCATGAAGTTTA
1091	AM_12772	ABCB11_c.-899delCT	rs4148771	in-del	N	2	169875534	A // B	- // CT	N/A	-	-	ABCB11	PA374	NM_003742.2|NP_003733.2||||intron|||	GGCCCACATTAGCTCCTCTGGCTCCAAGCGAAGAGATGGTCTCTAGCCCC[-/CT]GTTTGATTTGGGGCACTTACAGTCCTCTCGCCAGCTAAACTCTCACACTC
1092	AM_12773	ABCB11_c.-899delCT_alternate	rs4148771	in-del	N	2	169875534	A // B // C	T // CCT // C	N/A	-	-	ABCB11	PA374	NM_003742.2|NP_003733.2||||intron|||	GAGTGTGAGAGTTTAGCTGGCGAGAGGACTGTAAGTGCCCCAAATCAAAC[A/AGG/G]GGGCTAGAGACCATCTCTTCGCTTGGAGCCAGAGGAGCTAATGTGGGCCC
1093	AM_12775	ABCB11_c.-904C>A	rs3755163	snp	N	2	169875539	A // B	C // A	N/A	-	-	ABCB11	PA374	NM_003742.2|NP_003733.2||||intron|||	TGAGAGTTTAGCTGGCGAGAGGACTGTAAGTGCCCCAAATCAAACAGGGG[G/T]CTAGAGACCATCTCTTCGCTTGGAGCCAGAGGAGCTAATGTGGGCCCCAT
1094	AM_12776	ABCB11_c.-2450A>G	rs7578587	snp	N	2	169877085	A // B	G // A	N/A	-	-	ABCB11	PA374	NM_003742.2|NP_003733.2||||intron|||	AAACGGTTCAGTAATTACGGTAAATGTATGTAGATTGAAGTACTGATACA[C/T]GCTACACAGATGAACCTCAAAATCATGCTACGTGAAAGAAGACGGTCTCA
1095	AM_12778	ABCB11_c.-5543C>T	rs7602171	snp	N	2	169880178	A // B	T // C	N/A	-	-	ABCB11	PA374	NM_003742.2|NP_003733.2||||intron|||	AACGTAAGTTTAAACAAACAAGACAAAGTTTCAGAATGATACTGTATGAT[A/G]CCATTTATGTAAATTGTGTTACCTGCAAATCACTATTTGTAATGTTCGTA
1096	AM_12780	ABCB11_c.-7056C>T	rs3770602	snp	N	2	169881691	A // B	T // C	N/A	-	-	ABCB11	PA374	NM_003742.2|NP_003733.2||||intron|||	ATTTAGTCTCCATTTATTTTTTCCCTTGGCTTAGCTCTCCATTTAAAAAG[A/G]TTTCTTTCCACTGGTGTGCAAATACCTCGTAGTATTTAGAGGACAGTGGT
1097	AM_12781	ABCB11_c.-7449T>C	rs4148770	snp	N	2	169882084	A // B	T // C	N/A	-	-	ABCB11	PA374	NM_003742.2|NP_003733.2||||intron|||	TTCCAGGGTCATTTGTAGTAATCTGTCCTCCATTAAGCACAGGAATACTA[A/G]TCCACTAACCTATTCTCTTTACTTTCCTTCTGTGTCCCCTTGTCAATTCC
1098	AM_12782	ABCB11_c.-8583G>A	rs3770603	snp	N	2	169883218	A // B	G // A	N/A	-	-	ABCB11	PA374	NM_003742.2|NP_003733.2||||intron|||	TATATATTATTAGACCATGTTTTCTTCCACTGGCAAATTATTTTTTTTAT[C/T]AGATGAGATGTTGGGAAACCCATACATCAGATGCTGGAGGACATGGCTGC
1099	AM_12783	ABCB11_c.-10013G>A	rs4668115	snp	N	2	169884648	A // B	A // G	N/A	-	-	ABCB11	PA374	NM_003742.2|NP_003733.2||||intron|||	GATTTCTTCCTGGGCCTCAGGCTGCCCTGAACTGATCTCACAGTACAGGG[A/G]TTGACATTTTCTGCAAAGAGCTGTATAGTGAATATTTTAGGTATGGGAGA
1100	AM_12785	ABCB11_c.-12519C>T	rs4148768	snp	N	2	169887154	A // B	C // T	N/A	-	-	ABCB11	PA374	NM_003742.2|NP_003733.2||||intron|||	TAGAGGGGAGAAAGTTTGTTTCTAGGATCTAATTTCAGTTTTTAGGTCAC[C/T]CAAGCCAGTGGGAGTCACATATTGCTAATGGCTTGAGCACAGAGATCAAA
1101	AM_12843	AOX1_83558A>G(H1297R)	rs3731722	snp	N	2	201534389	A // B	G // A	N/A	+	+	AOX1	PA24842	NM_001159.3|NP_001150.3|A|H|1297|coding-nonsynonymous|G|R|1297	CCATCCTAATCTTCTCCGGGGTCAGTGGACTATTAAGGGTCAAGGGTCCA[C/T]GCAGGCCTCTCTCCTGTCGTGCTGCACTCACTGCGTCATGGATAGCGAAA
1102	AM_12847	AOX1_T>C(rs7563682)	rs7563682	snp	N	2	201539206	A // B	C // T	N/A	+	+	AOX1	PA24842	NM_001159.3||||||||	GGGGGGTGATATTACAAGACTGGGGACAAGATGGCATATGAATGGGCATA[C/T]GGAAGTGGCATGATATGTGAAGATTTTTGTATCACAGGTTAACACCCAGC
1103	AM_12848	AOX1_A>G(rs11684227)	rs11684227	snp	N	2	201540533	A // B	A // G	N/A	+	+	AOX1	PA24842	NM_001159.3||||||||	CAGGAACTGTTTTAAGCACTTTACTTCACAACAGCCCCAAGGGAGATACT[A/G]TTATTTTGACTATTTTACAGAAAGCAATTGAGGCATGGAGAACCTAAGTA
1104	AM_12849	AOX1_C>T(rs11678615)	rs11678615	snp	N	2	201541621	A // B	C // T	N/A	+	+	AOX1	PA24842	NM_001159.3||||||||	CTGCTTCATCCACTATTCATCCTCTTCCAGGGAGCACATGGCAAGCCTGT[C/T]AGGCGGACACAGGAACAGGTGCTTTTGATACAACTTCACAAGATTCAGCC
1105	AM_12850	AOX1_G>A(rs16834027)	rs16834027	snp	N	2	201541827	A // B	G // A	N/A	+	+	AOX1	PA24842	NM_001159.3||||||||	AGTCACACAGCAAATCAGCAACTCACACACAAGTCACCTGAACCTAGGAT[C/T]GTCTTGGCAAACATTAATAAAAGATTGCTTCTATCATGGTTTCTTTCTTT
1106	AM_12851	AOX1_T>G(rs16834034)	rs16834034	snp	N	2	201542014	A // B	T // G	N/A	+	+	AOX1	PA24842	NM_001159.3||||||||	TGAAGTTATCAACACAATCGCTTTGCATCTGGTAATCCTGACACCTTTAC[A/C]TGCATTACAGAGATTCTGTCTGTCTCTTTCTCCACCTCCCTCTCCTTTCC
1107	AM_12852	AOX1_T>C(rs6729738)	rs6729738	snp	N	2	201543496	A // B	C // T	N/A	+	+	AOX1	PA24842	NM_001159.3||||||||	ATTAAAAAAAAAAAAAAAACCTCTGGATACTGCAATTTCTCTTGCACTTA[C/T]AGAACATTTTCCTTCTGTCATGCATCATTTCAGTTTGTCAGTGTGATGGC
1108	AM_12853	CYP20A1_-19C>T	rs60606072	snp	N	2	204103767	A // B	T // C	N/A	+	+	CYP20A1	PA134911420	NM_177538.2|||||mrna-utr|||	AAGGTAACGGCGAAGATCGCGAAGTCCAACATGGTTCTGCCGCCCAGGGA[A/G]CCACGTCTCGGATCGGCCGCTCCAGCAGCAGCGCCTCAGCCTGGCCCAAT
1109	AM_12854	CYP20A1_7789T>G(F73L)	rs13397243	snp	N	2	204111574	A // B	G // T	N/A	+	+	CYP20A1	PA134911420	NM_177538.2|NP_803882.1|T|F|73|coding-nonsynonymous|G|L|73	TTCCTGGTTAATTTGCATGAGAGATATGGGCCTGTGGTCTCCTTCTGGTT[G/T]GGCAGGCGCCTCGTGGTTAGTTTGGGCACTGTTGATGTACTGAAGCAGCA
1110	AM_12855	CYP20A1_12905T>C(L97S)	rs2043449	snp	N	2	204116690	A // B	T // C	N/A	+	+	CYP20A1	PA134911420	NM_177538.2|NP_803882.1|T|L|97|coding-nonsynonymous|C|S|97	CACCAGATTGATACCTTAATAATGACTTCAGCATGGTTTCAAAAGGGTCC[A/G]CTGAAACAGACAAATTAAATATTTCTGTATCAAAATAATCACTCAAAAAG
1111	AM_12856	CYP20A1_12985A>G(K124E)	rs17851797	snp	N	2	204116770	A // B	A // G	N/A	+	+	CYP20A1	PA134911420	NM_177538.2|NP_803882.1|A|K|124|coding-nonsynonymous|G|E|124	TATTAAGGTATCAATCTGGTGGTGGCAGTGTGAGTGAAAACCACATGAGG[A/G]AAAAATTGTATGAAAATGGTGTGACTGATTCTCTGAAGAGTAACTTTGCC
1112	AM_12857	CYP20A1_50767C>T(L346F)	rs1048013	snp	N	2	204154552	A // B	T // C	N/A	+	+	CYP20A1	PA134911420	NM_177538.2|NP_803882.1|C|L|346|coding-nonsynonymous|T|F|346	TACCTCTCTAGGAATAATAAATCGGTCAATTTTTCCTTCAATATCTTGAA[A/G]CTGGGCAGAAACTGGAGTCAGTTTGGCAGTTCGAACAGTTTCACAAAGCA
1113	AM_12877	CYP27A1_c.475C>T(Q159X)	rs72551314	snp	N	2	219676973	A // B	C // T	N/A	+	+	CYP27A1	PA135	NM_000784.3|NP_000775.1|C|Q|159|coding-nonsynonymous|T|X|159	CTGTTCCTCTGCGTCCCTGCAGGGAAGGACACCACTGGTACCAGCTGCGC[C/T]AGGCTCTGAACCAGCGGTTGCTGAAGCCAGCGGAAGCAGCGCTCTATACG
1114	AM_12878	CYP27A1_c.490C>T(R164W)	rs61733615	snp	N	2	219676988	A // B	C // T	N/A	+	+	CYP27A1	PA135	NM_000784.3|NP_000775.1|C|R|164|coding-nonsynonymous|T|W|164	CCTGCAGGGAAGGACACCACTGGTACCAGCTGCGCCAGGCTCTGAACCAG[C/T]GGTTGCTGAAGCCAGCGGAAGCAGCGCTCTATACGGATGCTTTCAATGAG
1115	AM_12879	CYP27A1_c.506C>T(A169V)	rs59443548	snp	N	2	219677004	A // B	C // T	N/A	+	+	CYP27A1	PA135	NM_000784.3|NP_000775.1|C|A|169|coding-nonsynonymous|T|V|169	CCACTGGTACCAGCTGCGCCAGGCTCTGAACCAGCGGTTGCTGAAGCCAG[C/T]GGAAGCAGCGCTCTATACGGATGCTTTCAATGAGGTGATTGATGACTTTA
1116	AM_12880	CYP27A1_c.524C>T(T175M)	rs2229381	snp	N	2	219677022	A // B	C // T	N/A	+	+	CYP27A1	PA135	NM_000784.3|NP_000775.1|C|T|175|coding-nonsynonymous|T|M|175	CCAGGCTCTGAACCAGCGGTTGCTGAAGCCAGCGGAAGCAGCGCTCTATA[C/T]GGATGCTTTCAATGAGGTGATTGATGACTTTATGACTCGACTGGACCAGC
1117	AM_12881	CYP27A1_c.691C>T(R231X)	rs72551315	snp	N	2	219677319	A // B	C // T	N/A	+	+	CYP27A1	PA135	NM_000784.3|NP_000775.1|C|R|231|coding-nonsynonymous|T|X|231	ACTCAGCTATTTGCTACATCCTGTTCGAGAAACGCATTGGCTGCCTGCAG[C/T]GATCCATCCCCGAGGACACCGTGACCTTCGTCAGATCCATCGGGTTAATG
1118	AM_12894	CYP27A1_c.1374delC(P458X)	rs5838709	in-del	N	2	219679378	A // B	- // C	N/A	+	+	CYP27A1	PA135	NM_000784.3|NP_000775.1|C|P|458|coding-nonsynonymous|-|X|458	GAAAGCTTCCAGCCCCACCGCTGGCTGAGAAACAGCCAGCCTGCTACCCC[-/C]AGGATCCAGCACCCATTTGGCTCTGTGCCCTTTGGCTATGGGGTCCGGGC
1119	AM_12911	UGT1A8_c.313T>A(L105M)	rs1126788	snp	N	2	234526666	A // B	A // T	N/A	+	+	UGT1A8	PA37183	||||||||	GGGAATTCATGGATTTCGCCGATGCTCAATGGAAAGCACAAGTACGAAGT[A/T]TGTTTTCTCTATTTCTGAGTTCATCCAATGGTTTTTTTAACTTATTTTTT
1120	AM_12912	UGT1A8_c.315G>A(L105L)	rs1126790	snp	N	2	234526668	A // B	A // G	N/A	+	+	UGT1A8	PA37183	||||||||	GAATTCATGGATTTCGCCGATGCTCAATGGAAAGCACAAGTACGAAGTTT[A/G]TTTTCTCTATTTCTGAGTTCATCCAATGGTTTTTTTAACTTATTTTTTTC
1121	AM_12913	UGT1A8_c.327T>A(F109L)	rs1126792	snp	N	2	234526680	A // B	A // T	N/A	+	+	UGT1A8	PA37183	||||||||	TTCGCCGATGCTCAATGGAAAGCACAAGTACGAAGTTTGTTTTCTCTATT[A/T]CTGAGTTCATCCAATGGTTTTTTTAACTTATTTTTTTCGCATTGCAGGAG
1122	AM_12914	UGT1A8_c.328C>A(L110M)	rs1126793	snp	N	2	234526681	A // B	A // C	N/A	+	+	UGT1A8	PA37183	||||||||	TCGCCGATGCTCAATGGAAAGCACAAGTACGAAGTTTGTTTTCTCTATTT[A/C]TGAGTTCATCCAATGGTTTTTTTAACTTATTTTTTTCGCATTGCAGGAGT
1123	AM_12915	UGT1A8_c.352A>G(N118D)	rs1126798	snp	N	2	234526705	A // B	G // A	N/A	+	+	UGT1A8	PA37183	||||||||	TACTAATTTTCGGTCATTAAACAAACTCCTGCAATGCGAAAAAAATAAGT[C/T]AAAAAAACCATTGGATGAACTCAGAAATAGAGAAAACAAACTTCGTACTT
1124	AM_12923	UGT1A8_c.622T>C(W208R)	rs1126802	snp	N	2	234526975	A // B	C // T	N/A	+	+	UGT1A8	PA37182	||||||||	CCAGAATTCTCTTAGGGTTCTCAGATGCCATGACTTTCAAGGAGAGAGTA[C/T]GGAACCACATCATGCACTTGGAGGAACATTTATTTTGCCAGTATTTTTCC
1125	AM_12924	UGT1A8_c.634A>G(M212V)	rs1126803	snp	N	2	234526987	A // B	A // G	N/A	+	+	UGT1A8	PA419	||||||||	TAGGGTTCTCAGATGCCATGACTTTCAAGGAGAGAGTACGGAACCACATC[A/G]TGCACTTGGAGGAACATTTATTTTGCCAGTATTTTTCCAAAAATGCCCTA
1126	AM_12925	UGT1A8_c.648A>C(E216D)	rs1126804	snp	N	2	234527001	A // B	A // C	N/A	+	+	UGT1A8	PA37183	||||||||	GCCATGACTTTCAAGGAGAGAGTACGGAACCACATCATGCACTTGGAGGA[A/C]CATTTATTTTGCCAGTATTTTTCCAAAAATGCCCTAGAAATAGCCTCTGA
1127	AM_12932	UGT1A8*3_c.830G>A(C277Y)	rs17863762	snp	N	2	234527183	A // B	A // G	N/A	+	+	UGT1A8	PA37183	||||||||	CTATCCCAAACCCGTGATGCCCAATATGATCTTCATTGGTGGTATCAACT[A/G]CCATCAGGGAAAGCCATTGCCTATGGTAAGTCACCTCTCCTTTAGCACAT
1128	AM_12938	UGT1A10*5_c.177G>A(M59I)	rs56935833	snp	N	2	234545345	A // B	A // G	N/A	+	+	UGT1A10	PA37174	NM_019075.2|NP_061948.1|G|M|59|coding-nonsynonymous|A|I|59	TCGGTGGTGGAGAAACTTATCCTCAGGGGGCATGAGGTGGTTGTAGTCAT[A/G]CCAGAGGTGAGTTGGCAACTGGAAAGATCACTGAATTGCACAGTGAAGAC
1129	AM_12941	UGT1A10_c.597T>C(D199D)	rs45523834	snp	N	2	234545765	A // B	C // T	N/A	+	+	UGT1A10	PA37174	NM_019075.2|NP_061948.1|T|D|199|coding-synonymous|C|D|199	TGCCCTGCTCCTCTTTCCTATGTCCCCAATGATCTCTTAGGGTTCTCAGA[C/T]GCCATGACTTTCAAGGAGAGAGTATGGAACCACATCGTGCACTTGGAGGA
1130	AM_12942	UGT1A10*6_c.605C>T(T202I)	rs58704432	snp	N	2	234545773	A // B	T // C	N/A	+	+	UGT1A10	PA37174	NM_019075.2|NP_061948.1|C|T|202|coding-nonsynonymous|T|I|202	ATAAATGGTCCTCCAAGTGCACGATGTGGTTCCATACTCTCTCCTTGAAA[A/G]TCATGGCATCTGAGAACCCTAAGAGATCATTGGGGACATAGGAAAGAGGA
1131	AM_12947	UGT1A9*1b_c.-118insT	rs3832043	in-del	N	2	234580463	A // B	- // T	N/A	+	+	UGT1A9	PA419	||||||||	TATATTCTTGTTCTTTTGGGTAAATCATTGTCAGTGACTGATTTTTTTTT[-/T]ATGAAAGGATAAAAACACGCCCTCTATTGGGGTCAGGTTTTGTGCTGGTA
1132	AM_12948	UGT1A9_c.9C>G(C3W)	rs72551329	snp	N	2	234580589	A // B	C // G	N/A	+	+	UGT1A9	PA419	||||||||	AGCTTAGATTCCCAGCTGCTTGCTCTCAGCTGCAGTTCTCTGATGGCTTG[C/G]ACAGGGTGGACCAGCCCCCTTCCTCTATGTGTGTGTCTGCTGCTGACCTG
1133	AM_12949	UGT1A9*3_c.98T>C(M33T)	rs72551330	snp	N	2	234580678	A // B	C // T	N/A	+	+	UGT1A9	PA419	||||||||	GCTGCTGACCTGTGGCTTTGCCGAGGCAGGGAAGCTACTGGTAGTGCCCA[C/T]GGATGGGAGCCACTGGTTCACCATGAGGTCGGTGGTGGAGAAACTCATTC
1134	AM_12951	UGT1A9*4_c.726T>G(Y242X)	rs66915469	snp	N	2	234581306	A // B	T // G	N/A	+	+	UGT1A9	PA419	||||||||	AAAACAAAGTCCGTTCGCAACAACCAAATTGATGTGTGGCTGTAGAGATC[A/C]TACTCCGTAACAGGTGTTTGGAGAATTTCAGAGGCTATTTCTAGGGCATT
1135	AM_12953	UGT1A9*5_c.766G>A(D256N)	rs58597806	snp	N	2	234581346	A // B	A // G	N/A	+	+	UGT1A9	PA419	||||||||	TTACGGAGTATGATCTCTACAGCCACACATCAATTTGGTTGTTGCGAACG[A/G]ACTTTGTTTTGGACTATCCCAAACCCGTGATGCCCAACATGATCTTCATT
1136	AM_12955	UGT1A9_c.830G>A(C277Y)	N/A	snp	N	2	234581410	A // B	A // G	N/A	+	+	UGT1A9	PA37183	||||||||	CTATCCCAAACCCGTGATGCCCAACATGATCTTCATTGGTGGTATCAACT[A/G]CCATCAGGGAAAGCCGTTGCCTATGGTAAGTTATCTCTCCTTTAGCACCT
1137	AM_12956	UGT1A7*12_c.-57T>G(5'UTR)	rs7586110	snp	N	2	234590527	A // B	T // G	N/A	+	+	UGT1A7	PA420	||||||||	ACTTCAGCCCAGAGCCAGCAGCTGGGATTCTAAGCTCCTATAATATAGTA[A/C]GTGGAAGAAGTACAGATAGAACCTGCCCTCAAAAGAAGGCGTGTACTTAT
1138	AM_12961	UGT1A7*5_c.343G>A(G115S)	rs61261057	snp	N	2	234590926	A // B	G // A	N/A	+	+	UGT1A7	PA37182	||||||||	TCGGTCATTAAACAAACTCCTGCAATTTGAAAAAAATAAGTCAAAAATAC[C/T]ATTGGATGAACTTGTTAATAGAGAAAATGCACTTCGCAATGGTGCCGTCC
1139	AM_12969	UGT1A6_c.19T>G(S7A)	rs6759892	snp	N	2	234601669	A // B	G // T	N/A	+	+	UGT1A6	PA419	NM_019076.4||||||||	TTATTACCGTTGTTACTTTAACTCTTTCCAGGATGGCCTGCCTCCTTCGC[G/T]CATTTCAGAGAATTTCTGCAGGGGTTTTCTTCTTAGCACTTTGGGGCATG
1140	AM_12971	UGT1A6_c.57A>T(A19A)	rs1042707	snp	N	2	234601707	A // B	A // T	N/A	+	+	UGT1A6	PA419	NM_019076.4||||||||	TGCCTCCTTCGCTCATTTCAGAGAATTTCTGCAGGGGTTTTCTTCTTAGC[A/T]CTTTGGGGCATGGTTGTAGGTGACAAGCTGCTGGTGGTCCCTCAGGACGG
1141	AM_12972	UGT1A6_c.209C>A(S70Y)	rs1042708	snp	N	2	234601859	A // B	C // A	N/A	+	+	UGT1A6	PA419	NM_019076.4||||||||	GCTCTTCTTGGTCATACGGCACTGGATAGATTTTTCTTGTGTAGTATTTG[G/T]ATTCTTTCAAAAGCAAATTAACTTCAGGCACCACCACTACAATCTCATGA
1142	AM_12973	UGT1A6_c.315A>G(L105L)	rs1105880	snp	N	2	234601965	A // B	G // A	N/A	+	+	UGT1A6	PA419	NM_019076.4||||||||	TACAGGCCAATAACAATCATGTTATTCCTGTACTCTGTCTGAGGAGCAGT[C/T]AGGAATGATCGCTCAGCAAAGTGATTGTTTCCAAATGATTGGTAACGGTT
1143	AM_12974	UGT1A6_c.541A>G(T181A)	rs2070959	snp	N	2	234602191	A // B	A // G	N/A	+	+	UGT1A6	PA37181	NM_019076.4||||||||	GCCTACCATCTGTGTACCTCTTCAGGGGTTTTCCGTGTTCCCTGGAGCAT[A/G]CATTCAGCAGAAGCCCAGACCCTGTGTCCTACATTCCCAGGTGCTACACA
1144	AM_12976	UGT1A6_c.627G>T(V209V)	rs17863783	snp	N	2	234602277	A // B	G // T	N/A	+	+	UGT1A6	PA37181	NM_019076.4||||||||	CCCAGGTGCTACACAAAGTTTTCAGACCACATGACTTTTTCCCAACGAGT[G/T]GCCAACTTCCTTGTTAATTTGTTGGAGCCCTATCTATTTTATTGTCTGTT
1145	AM_12980	UGT1A5_c.232A>G(T78A)	rs72551334	snp	N	2	234621869	A // B	A // G	N/A	+	+	UGT1A5	PA37180	NM_019078.1|NP_061951.1|A|T|78|coding-nonsynonymous|G|A|78	TCACCCTGGAGGTGAATATGTACATCAAAGAAGAGAACTTTTTCACCCTG[A/G]CAACGTATGCCATTTCATGGACCCAGGACGAATTTGATCGCCTTTTGCTG
1146	AM_12981	UGT1A5_c.285T>C(G95G)	rs17874942	snp	N	2	234621922	A // B	T // C	N/A	+	+	UGT1A5	PA37181	NM_019078.1|NP_061951.1|T|G|95|coding-synonymous|C|G|95	CTAGAAAATTTCATCAGAAGATGTTCTGTTTCAAAGAACGATTGAGTGTG[A/G]CCCAGCAAAAGGCGATCAAATTCGTCCTGGGTCCATGAAATGGCATACGT
1147	AM_12982	UGT1A5_c.424C>A(H142N)	rs3755320	snp	N	2	234622061	A // B	C // A	N/A	+	+	UGT1A5	PA37181	NM_019078.1|NP_061951.1|C|H|142|coding-nonsynonymous|A|N|142	CGCGCAGAGGTGAAAGGGGTCTGTTAGAACCACATCAAAGGAAGTAGCAT[G/T]CAGGTGCCTGATCAGGGCCTCATTATGCAGTAGCTCCACACAAGACCTAT
1148	AM_12986	UGT1A5_c.621delC(F207X)	rs72551335	in-del	N	2	234622258	A // B	- // C	N/A	+	+	UGT1A5	PA37179	NM_019078.1|NP_061951.1|C|F|207|coding-nonsynonymous|-|X|207	TCCTCCTATATTCCTAGATTACTAACGACCAATTCAGACCACATGACATT[-/C]CTGCAAAGGGTCAAGAACATGCTCTACCCTCTGGCCCTGTCCTACCTTTG
1149	AM_12991	UGT1A4*2_c.70C>A(P24T)	rs6755571	snp	N	2	234627536	A // B	C // A	N/A	+	+	UGT1A4	PA37179	NM_007120.2|NP_009051.1|C|P|24|coding-nonsynonymous|A|T|24	GGGGCTGCCATCAGTGGGCACCACCAACACCTTTCCACTCTCAGCCCAGG[G/T]CTGGACACTGAGGAGGAGCAGCAGTCCTGTGGCCAGCCGCGGCAGGGGAA
1150	AM_12999	UGT1A4_c.621delC(F207X)	rs68014726	in-del	N	2	234628087	A // B	- // C	N/A	+	+	UGT1A4	PA37179	NM_007120.2|NP_009051.1|C|F|207|coding-nonsynonymous|-|X|207	TCCTCCTATATTCCTAAGTTACTAACGACCAATTCAGACCACATGACATT[-/C]CTGCAAAGGGTCAAGAACATGCTCTACCCTCTGGCCCTGTCCTACATTTG
1151	AM_13004	UGT1A3*5_c.17A>G(Q6R)	rs28898617	snp	N	2	234637789	A // B	G // A	N/A	+	+	UGT1A3	PA37178	NM_019093.2|NP_061966.1|A|Q|6|coding-nonsynonymous|G|R|6	GGACACTGAGGAGAAGCAGCAGTCCTGTGGCCAGCCACGGCAGGGGAACC[C/T]GGAGTCCTGTGGCCATCTCAGCAGAAGACACGGACAGCTGACTGTCCACC
1152	AM_13005	UGT1A3_c.31T>C(W11R)	rs3821242	snp	N	2	234637803	A // B	T // C	N/A	+	+	UGT1A3	PA419	NM_019093.2|NP_061966.1|T|W|11|coding-nonsynonymous|C|R|11	CTCAGCCCAGGGCTGGACACTGAGGAGAAGCAGCAGTCCTGTGGCCAGCC[A/G]CGGCAGGGGAACCTGGAGTCCTGTGGCCATCTCAGCAGAAGACACGGACA
1153	AM_13007	UGT1A3_c.81G>A(E27E)	rs6706232	snp	N	2	234637853	A // B	A // G	N/A	+	+	UGT1A3	PA37178	NM_019093.2|NP_061966.1|G|E|27|coding-synonymous|A|E|27	TGGCTGGCCACAGGACTGCTGCTTCTCCTCAGTGTCCAGCCCTGGGCTGA[A/G]AGTGGAAAGGTGTTGGTGGTGCCCATTGATGGCAGCCACTGGCTCAGCAT
1154	AM_13008	UGT1A3*4_c.133C>T(R45W)	rs45625338	snp	N	2	234637905	A // B	C // T	N/A	+	+	UGT1A3	PA37178	NM_019093.2|NP_061966.1|C|R|45|coding-nonsynonymous|T|W|45	GTGGAAAGGTGTTGGTGGTGCCCATTGATGGCAGCCACTGGCTCAGCATG[C/T]GGGAGGTCTTGCGGGAGCTCCATGCCAGAGGCCACCAGGCAGTGGTCCTC
1155	AM_13011	UGT1A3_c.477A>G(A159A)	rs7574296	snp	N	2	234638249	A // B	G // A	N/A	+	+	UGT1A3	PA419	NM_019093.2|NP_061966.1|A|A|159|coding-synonymous|G|A|159	ATGTTCCTCAAAAAAAACACAGTAGGAATCGACAGGTACTTAGCCAGCAC[C/T]GCCGCGCAGAGGTTAACGGGGTCTGTTAAAACCACATCAAAGGAAGTAGC
1156	AM_13012	UGT1A3_c.529delC(P177X)	rs72551338	in-del	N	2	234638301	A // B	- // C	N/A	+	+	UGT1A3	PA37178	NM_019093.2|NP_061966.1|C|P|177|coding-nonsynonymous|-|X|177	TGCTGGCTAAGTACCTGTCGATTCCTACTGTGTTTTTTTTGAGGAACATT[-/C]CATGTGATTTAGACTTTAAGGGCACACAGTGTCCAAACCCTTCCTCCTAT
1157	AM_13017	UGT1A4_c.621delC(F207X)_alternate	rs68014726	in-del	N	2	234656479	A // B	- // C	N/A	+	+	UGT1A4	PA37179	NM_007120.2|NP_009051.1|C|F|207|coding-nonsynonymous|-|X|207	TCCTCCTATATTCCTAAGTTACTAACGACCAATTCAGACCACATGACATT[-/C]CTGCAAAGGGTCAAGAACATGCTCTACCCTCTGGCCCTGTCCTACCTTTG
1158	AM_13018	UGT1A1*60_c.-3279T>G(Promoter)	rs4124874	snp	Y	2	234665659	A // B	G // T	N/A	+	+	UGT1A1	PA420	NM_000463.2||||||||	TAAGCACGCAATGAACAGTCATAGTAAGCTGGCCAAGGGTAGAGTTCAGT[G/T]TGAACAAAGCAATTTGAGAACATCAAAGGAAGTTTGGGGAACAGCAAGGG
1159	AM_13019	UGT1A1*93_c.-3156G>A(Promoter)	rs10929302	snp	Y	2	234665782	A // B	G // A	N/A	+	+	UGT1A1	PA420	NM_000463.2||||||||	GTCCTCTGCCTTGCTCTCAAAACTCTGGGATAGACCCCAGCCCACCTGTC[C/T]AAGCTCATTCCTCCTCTCTAGCCCTTCTGCTTGCCCCCTCCCTCTGCCTC
1160	AM_13020	UGT1A1_c.-2950A>G	rs111741722	snp	N	2	234665983	A // B	A // G	N/A	+	+	UGT1A1	PA420	NM_000463.2||||||||	CAGCTGGGGGTTGGGGGACAGGGGGGCTGGGGCCCTGAAATGGGACCATG[A/G]CAGCTGGGTCTGAGAGACAGTGGTAGAAACATCCAGATTCAGCACTTACT
1161	AM_13021	UGT1A1*112_c.-1353A>C	rs3755319	snp	N	2	234667582	A // B	A // C	N/A	+	+	UGT1A1	PA420	NM_000463.2||||||||	ATAAATACAAATTTGAGTTGTTTTTGCTCATCTTTCCCTTTTGACTTCAA[A/C]TCAGTCATCAGAATTTCCCCAAATGCCTTTCCCCTGGATCTTGGGCCAGT
1162	AM_13022	UGT1A1*80_c.-364C>T	rs887829	snp	N	2	234668570	A // B	T // C	N/A	+	+	UGT1A1	PA420	NM_000463.2||||||||	AGAGAGGAAGAAGGACGACTATGTAGTGAACAAGTTAGGCTTCTTTTCCA[A/G]AAATTAAACAGAAGGCTTTTTAGAAAGCCTTTTAGAAAGAAAAGAACACA
1163	AM_13024	UGT1A1*28_c.TATA-box(Promoter)	rs8175347	in-del	N	2	234668881	A // B	TATATATATATA // TATATATATATATA	(TA)5or6 // (TA)7or8	+	+	UGT1A1	PA420	||||||||	TCACGTGACACAGTCAAACATTAACTTGGTGTATCGATTGGTTTTTGCCA[TATATATATATA/TATATATATATATA]TAAGTAGGAGAGGGCGAACCTCTGGCAGGAGCAAAGGCGCCATGGCTGTGGA
1164	AM_13030	UGT1A1*6_c.211G>A(G71R)	rs4148323	snp	N	2	234669144	A // B	G // A	N/A	+	+	UGT1A1	PA420	NM_000463.2||||||||	ATCCTCCCTTTGGAATGGCACAGGGTACGTCTTCAAGGTGTAAAATGCTC[C/T]GTCTCTGATGTACAACGAGGCGTCAGGTGCTAGGACAACTATTTCATGTC
1165	AM_13031	UGT1A1*45_c.222C>A(Y74X)	rs72551340	snp	N	2	234669155	A // B	A // C	N/A	+	+	UGT1A1	PA420	NM_000463.2|NP_000454.1|C|Y|74|coding-nonsynonymous|A|X|74	GTTGTCCTAGCACCTGACGCCTCGTTGTACATCAGAGACGGAGCATTTTA[A/C]ACCTTGAAGACGTACCCTGTGCCATTCCAAAGGGAGGATGTGAAAGAGTC
1166	AM_13032	UGT1A1*62_c.247T>C(F83L)	rs56059937	snp	N	2	234669180	A // B	T // C	N/A	+	+	UGT1A1	PA420	NM_000463.2|NP_000454.1|T|F|83|coding-nonsynonymous|C|L|83	AACATTATGCCCGAGACTAACAAAAGACTCTTTCACATCCTCCCTTTGGA[A/G]TGGCACAGGGTACGTCTTCAAGGTGTAAAATGCTCCGTCTCTGATGTACA
1167	AM_13033	UGT1A1*12_c.524T>A(L175Q)	rs72551341	snp	N	2	234669457	A // B	A // T	N/A	+	+	UGT1A1	PA420	NM_000463.2||||||||	CATCGTGGCCCAGTACCTGTCTCTGCCCACTGTATTCTTCTTGCATGCAC[A/T]GCCATGCAGCCTGGAATTTGAGGCTACCCAGTGCCCCAACCCATTCTCCT
1168	AM_13034	UGT1A1*15_c.529T>C(C177R)	rs72551342	snp	N	2	234669462	A // B	C // T	N/A	+	+	UGT1A1	PA420	NM_000463.2|NP_000454.1|T|C|177|coding-nonsynonymous|C|R|177	TGGCCCAGTACCTGTCTCTGCCCACTGTATTCTTCTTGCATGCACTGCCA[C/T]GCAGCCTGGAATTTGAGGCTACCCAGTGCCCCAACCCATTCTCCTACGTG
1169	AM_13035	UGT1A1*8_c.625C>T(R209W)	rs72551343	snp	N	2	234669558	A // B	C // T	N/A	+	+	UGT1A1	PA420	NM_000463.2|NP_000454.1|C|R|209|coding-nonsynonymous|T|W|209	ACGTGCCCAGGCCTCTCTCCTCTCATTCAGATCACATGACCTTCCTGCAG[C/T]GGGTGAAGAACATGCTCATTGCCTTTTCACAGAACTTTCTGTGCGACGTG
1170	AM_13037	UGT1A1*27_c.686C>A(P229Q)	rs35350960	snp	N	2	234669619	A // B	A // C	N/A	+	+	UGT1A1	PA420	NM_000463.2||||||||	CATGCTCATTGCCTTTTCACAGAACTTTCTGTGCGACGTGGTTTATTCCC[A/C]GTATGCAACCCTTGCCTCAGAATTCCTTCAGAGAGAGGTGACTGTCCAGG
1171	AM_13038	UGT1A1*43_c.698T>G(L233R)	rs72551344	snp	N	2	234669631	A // B	T // G	N/A	+	+	UGT1A1	PA420	NM_000463.2|NP_000454.1|T|L|233|coding-nonsynonymous|G|R|233	AGCTCAATAGGTCCTGGACAGTCACCTCTCTCTGAAGGAATTCTGAGGCA[A/C]GGGTTGCATACGGGGAATAAACCACGTCGCACAGAAAGTTCTGTGAAAAG
1172	AM_13040	UGT1A1*14_c.826G>C(G276R)	rs72551345	snp	N	2	234669759	A // B	G // C	N/A	+	+	UGT1A1	PA420	NM_000463.2|NP_000454.1|G|G|276|coding-nonsynonymous|C|R|276	TCCAATACACACCTGGGATAGTGGATTTTGGTGAAGGCAGTTGATTCCAC[C/G]AACAAAAACCATATTGGGCATGATGGGCCTAGGGTAATCCTTCACAAAGT
1173	AM_13043	UGT1A1*11_c.923G>A(G308E)	rs62625011	snp	N	2	234675738	A // B	A // G	N/A	+	+	UGT1A1	PA420	NM_000463.2|NP_000454.1|G|G|308|coding-nonsynonymous|A|E|308	AGCCTACATTAATGCTTCTGGAGAACATGGAATTGTGGTTTTCTCTTTGG[A/G]ATCAATGGTCTCAGAAATTCCAGAGAAGAAAGCTATGGCAATTGCTGATG
1174	AM_13044	UGT1A1*9_c.992A>G(Q331R)	rs72551348	snp	N	2	234675807	A // B	G // A	N/A	+	+	UGT1A1	PA420	NM_000463.2|NP_000454.1|A|Q|331|coding-nonsynonymous|G|R|331	GCTCCTGTGAAAATAGATATGAGGCCATGGTATAGAATCTTCTTACTGTC[C/T]GAGGGATTTTGCCCAAAGCATCAGCAATTGCCATAGCTTTCTTCTCTGGA
1175	AM_13045	UGT1A1*10_c.1021C>T(R341X)	rs72551349	snp	N	2	234676519	A // B	C // T	N/A	+	+	UGT1A1	PA420	NM_000463.2|NP_000454.1|C|R|341|coding-nonsynonymous|T|X|341	CGTTCTGCTCTTTTTGCCCCTCCCAGGTCCTGTGGCGGTACACTGGAACC[C/T]GACCATCGAATCTTGCGAACAACACGATACTTGTTAAGTGGCTACCCCAA
1176	AM_13046	UGT1A1*4_c.1069C>T(Q357X)	rs72551350	snp	N	2	234676567	A // B	C // T	N/A	+	+	UGT1A1	PA420	NM_000463.2|NP_000454.1|C|Q|357|coding-nonsynonymous|T|X|357	CCCGACCATCGAATCTTGCGAACAACACGATACTTGTTAAGTGGCTACCC[C/T]AAAACGATCTGCTTGGTATGTTGGGCGGATTGGATGTATAGGTCAAACCA
1177	AM_13047	UGT1A1*16_c.1070A>G(Q357R)	rs72551351	snp	N	2	234676568	A // B	G // A	N/A	+	+	UGT1A1	PA420	NM_000463.2|NP_000454.1|A|Q|357|coding-nonsynonymous|G|R|357	CTGGTTTGACCTATACATCCAATCCGCCCAACATACCAAGCAGATCGTTT[C/T]GGGGTAGCCACTTAACAAGTATCGTGTTGTTCGCAAGATTCGATGGTCGG
1178	AM_13049	UGT1A1*29_c.1099C>G(R367G)	rs55750087	snp	N	2	234676880	A // B	C // G	N/A	+	+	UGT1A1	PA420	NM_000463.2|NP_000454.1|C|R|367|coding-nonsynonymous|G|G|367	TGTAACTGCTGACATCCTCCCTATTTTGCATCTCAGGTCACCCGATGACC[C/G]GTGCCTTTATCACCCATGCTGGTTCCCATGGTGTTTATGAAAGCATATGC
1179	AM_13050	UGT1A1*20_c.1102G>A(A368T)	rs72551352	snp	N	2	234676883	A // B	A // G	N/A	+	+	UGT1A1	PA420	NM_000463.2|NP_000454.1|G|A|368|coding-nonsynonymous|A|T|368	AACTGCTGACATCCTCCCTATTTTGCATCTCAGGTCACCCGATGACCCGT[A/G]CCTTTATCACCCATGCTGGTTCCCATGGTGTTTATGAAAGCATATGCAAT
1180	AM_13051	UGT1A1*3_c.1124C>T(S375F)	rs72551353	snp	N	2	234676905	A // B	C // T	N/A	+	+	UGT1A1	PA420	NM_000463.2|NP_000454.1|C|S|375|coding-nonsynonymous|T|F|375	TTGCATCTCAGGTCACCCGATGACCCGTGCCTTTATCACCCATGCTGGTT[C/T]CCATGGTGTTTATGAAAGCATATGCAATGGCGTTCCCATGGTGATGATGC
1181	AM_13052	UGT1A1*17_c.1143C>G(S381R)	rs72551354	snp	N	2	234676924	A // B	C // G	N/A	+	+	UGT1A1	PA420	NM_000463.2|NP_000454.1|C|S|381|coding-nonsynonymous|G|R|381	ATGACCCGTGCCTTTATCACCCATGCTGGTTCCCATGGTGTTTATGAAAG[C/G]ATATGCAATGGCGTTCCCATGGTGATGATGCCCTTGTTTGGTGATCAGAT
1182	AM_13053	UGT1A1*18_c.1201G>C(A401P)	rs72551355	snp	N	2	234676982	A // B	G // C	N/A	+	+	UGT1A1	PA420	NM_000463.2|NP_000454.1|G|A|401|coding-nonsynonymous|C|P|401	TTCCAGAACATTCAGGGTCACTCCAGCTCCCTTAGTCTCCATGCGCTTTG[C/G]ATTGTCCATCTGATCACCAAACAAGGGCATCATCACCATGGGAACGCCAT
1183	AM_13057	UGT1A1*24_c.1309A>T(K437X)	rs72551357	snp	N	2	234680912	A // B	T // A	N/A	+	+	UGT1A1	PA420	NM_000463.2|NP_000454.1|A|K|437|coding-nonsynonymous|T|X|437	CTCCACCGGGCGGTCCTTGTGAAGGCTGGAGAGGCGCATGATGTTCTCCT[A/T]GTAACTAAACACAAAGACAGTTTCGTTATGCCTGGAACACCTGTGGTATG
1184	AM_13060	UGT1A1_c.1428C>T(P476P)	rs28900406	snp	N	2	234681031	A // B	C // T	N/A	+	+	UGT1A1	PA37180	NM_000463.2|NP_000454.1|C|P|476|coding-synonymous|T|P|476	TTCTGGGTGGAGTTTGTGATGAGGCACAAGGGCGCGCCACACCTGCGCCC[C/T]GCAGCCCACGACCTCACCTGGTACCAGTACCATTCCTTGGACGTGATTGG
1185	AM_13063	UGT1A1*55_c.1487T>A(L496X)	rs72551361	snp	N	2	234681090	A // B	A // T	N/A	+	+	UGT1A1	PA420	NM_000463.2|NP_000454.1|T|L|496|coding-nonsynonymous|A|X|496	CGACCTCACCTGGTACCAGTACCATTCCTTGGACGTGATTGGTTTCCTCT[A/T]GGCCGTCGTGCTGACAGTGGCCTTCATCACCTTTAAATGTTGTGCTTATG
1186	AM_13064	UGT1A1_c.1531G>C(A511P)	rs1042709	snp	N	2	234681134	A // B	G // C	N/A	+	+	UGT1A1	PA37180	NM_000463.2|NP_000454.1|G|A|511|coding-nonsynonymous|C|P|511	GGCTTTCTTAACTCGCCCTTTTTTCCCCAAGCATTTCCGGTAGCCATAAG[C/G]ACAACATTTAAAGGTGATGAAGGCCACTGTCAGCACGACGGCCAAGAGGA
1187	AM_13067	UGT1A1*76_c.*211C>T(3'UTR)	rs10929303	snp	N	2	234681416	A // B	C // T	N/A	+	+	UGT1A1	PA420	NM_000463.2||||||||	AATAGACTCGCTAGTCAGTAAAGATATTTGAATATGTATCGTGCCCCCTC[C/T]GGTGTCTTTGATCAGGATGACATGTGCCATTTTTCAGAGGACGTGCAGAC
1188	AM_13068	UGT1A1*78_c.*339C>G(3'UTR)	rs1042640	snp	N	2	234681544	A // B	C // G	N/A	+	+	UGT1A1	PA420	NM_000463.2||||||||	ACTCTGAAACATGGCCTGTTTGGGAGTGCGGGATTCAAAGGTGGTCCCAC[C/G]GCTGCCCCTACTGCAAATGGCAGTTTTAATCTTATCTTTTGGCTTCTGCA
1189	AM_13070	UGT1A1*79_c.*440C>G(3'UTR)	rs8330	snp	N	2	234681645	A // B	C // G	N/A	+	+	UGT1A1	PA420	NM_000463.2||||||||	GATGGTTGCAATTGATCCTTAACCAATAATGGTCAGTCCTCATCTCTGTC[C/G]TGCTTCATAGGTGCCACCTTGTGTGTTTAAAGAAGGGAAGCTTTGTACCT
1190	AM_13097	PPARG_c.34C>G(P12A)	rs1801282	snp	N	3	12393125	A // B	C // G	N/A	+	+	PPARG	PA281	NM_015869.4|NP_056953.2|C|P|12|coding-nonsynonymous|G|A|12	CCCTATTCCATGCTGTTATGGGTGAAACTCTGGGAGATTCTCCTATTGAC[C/G]CAGAAAGCGATTCCTTCACTGATACACTGTCTGCAAACATATCACAAGGT
1191	AM_13120	PPARG_c.825C>T(F275F)	rs4135352	snp	N	3	12458208	A // B	C // T	N/A	+	+	PPARG	PA281	NM_015869.4|NP_056953.2|C|F|275|coding-synonymous|T|F|275	TTAGAAATCTCCAAGTCATCCACGTTTTCCCTGTTTTATTTGCAGCCATT[C/T]GTTATCTATGACATGAATTCCTTAATGATGGGAGAAGATAAAATCAAGTT
1192	AM_13137	PPARG_c.1273C>T(R425C)	rs72551364	snp	N	3	12475399	A // B	C // T	N/A	+	+	PPARG	PA281	NM_015869.4|NP_056953.2|C|R|425|coding-nonsynonymous|T|C|425	ATTTTTTGACTGAACCCCCTGTTGTGTTTTCCATATGTGCTTCCCCAGAC[C/T]GCCCAGGTTTGCTGAATGTGAAGCCCATTGAAGACATTCAAGACAACCTG
1193	AM_13138	PPARG_c.1431C>T(H477H)	rs3856806	snp	N	3	12475557	A // B	C // T	N/A	+	+	PPARG	PA281	NM_015869.4|NP_056953.2|C|H|477|coding-synonymous|T|H|477	GCCAAGCTGCTCCAGAAAATGACAGACCTCAGACAGATTGTCACGGAACA[C/T]GTGCAGCTACTGCAGGTGATCAAGAAGACGGAGACAGACATGAGTCTTCA
1194	AM_13140	PPARG_c.*1411G>C	rs1152003	snp	N	3	12477055	A // B	C // G	N/A	+	+	PPARG	PA281	NM_015869.4||||||||	CCTGTCCTCCTCCTTGGGACCACTCTGTCCAGAGATCTCTTTTCTGAACT[C/G]AGAGGCTAACTATCCGCATCATTAATGGAATGCTTGCCTCCCAAGCAGAT
1195	AM_13141	PPARG_c.*3173G>A	rs9833097	snp	N	3	12478817	A // B	A // G	N/A	+	+	PPARG	PA281	NM_015869.4||||||||	AGGGGACAGAGGCATCTGTGGCGGGCTTTCTTGGTGGCTTCTGGACTCCA[A/G]TGACTTTTTCTTGGCTCCCTCGAGGCTAAAAAGCAGGTATTTTCCTGGAC
1196	AM_13144	SLC6A6_c.-17711T>C	rs2341968	snp	N	3	14467432	A // B	C // T	N/A	+	+	SLC6A6	PA35912	NM_003043.3|NP_003034.2||||intron|||	TTCTTCCCTAGCCTGCGGGGTCAGTAGTTAGTAATCACGGCAGGTATGCA[C/T]GACTCTCACCAATTATGAGTATAATTAAATGGGAAGATGCCTTGCAAGCA
1197	AM_13148	SLC6A6_c.-10918C>T	rs2341970	snp	N	3	14474225	A // B	C // T	N/A	+	+	SLC6A6	PA35912	NM_003043.3|NP_003034.2||||intron|||	AGCAAGTCCAACAGTGCGCGACTCCCCAGGTCAGGAGAAGCCCCGATGTG[C/T]GCAGAATCTGCAGATGGGGCTGCTCTCGGCCCTGCCTCTGGCTGTGGAAA
1198	AM_13149	SLC6A6_c.28C>T(L10L)	rs9879642	snp	N	3	14485170	A // B	C // T	N/A	+	+	SLC6A6	PA35912	NM_003043.3|NP_003034.2|C|L|10|coding-synonymous|T|L|10	TGTCCCCCATAGAAAGCAAGGAGATGGCCACCAAGGAGAAGCTGCAGTGT[C/T]TGAAAGATTTCCACAAGGACATCCTGAAGCCCTCACCAGGGAAGAGCCCA
1199	AM_13150	SLC6A6_c.51C>G(I17M)	rs1042350	snp	N	3	14485193	A // B	G // C	N/A	+	+	SLC6A6	PA35912	NM_003043.3|NP_003034.2|C|I|17|coding-nonsynonymous|G|M|17	GCCTCGTCCTCAGGCCGCGTGCCTGGGCTCTTCCCTGGTGAGGGCTTCAG[C/G]ATGTCCTTGTGGAAATCTTTCAGACACTGCAGCTTCTCCTTGGTGGCCAT
1200	AM_13151	SLC6A6_c.52C>G(L18V)	rs1042351	snp	N	3	14485194	A // B	C // G	N/A	+	+	SLC6A6	PA35912	NM_003043.3|NP_003034.2|C|L|18|coding-nonsynonymous|G|V|18	TGGCCACCAAGGAGAAGCTGCAGTGTCTGAAAGATTTCCACAAGGACATC[C/G]TGAAGCCCTCACCAGGGAAGAGCCCAGGCACGCGGCCTGAGGACGAGGCT
1201	AM_13152	SLC6A6_708G>C(W236C)	N/A	snp	N	3	14499566	A // B	C // G	N/A	+	+	SLC6A6	PA35912	NM_003043.3|NP_003034.2|G|W|236|coding-nonsynonymous|C|C|236	CTCGCTCTCTGCCTTCTTTTAGTCTGGCTAGTGTGTTTCTTCTGCATCTG[C/G]AAGGGCGTCAGGTCCACTGGGAAGGTAAGTTGGACTTCTGTCCGTCCCCT
1202	AM_13153	SLC6A6_c.*4206A>G	rs9036	snp	N	3	14530721	A // B	G // A	N/A	+	+	SLC6A6	PA35912	NM_003043.3|||||mrna-utr|||	TGATATACATATTTATCTAAAAAGCAAAAGAGAAAAAAACCCCTGCAAAA[C/T]ACAGGGAATCATATCATAAAACATTTATACACAAAAGCTTGTATACTGCA
1203	AM_13154	SLC22A13_c.159T>C(A53A)	rs9842091	snp	N	3	38307510	A // B	C // T	N/A	+	+	SLC22A13	PA32814	NM_004256.3|NP_004247.2|T|A|53|coding-synonymous|C|A|53	TTTGCCCATGTCTTCATGGTCCTAGATGAGCCCCACCACTGTGCAGTGGC[C/T]TGGGTGAAGAACCACACTTTCAACCTGAGTGCTGCTGAACAGCTGGTACT
1204	AM_13160	SLC22A13_c.437C>G(A146G)	rs149836	snp	N	3	38315821	A // B	C // G	N/A	+	+	SLC22A13	PA32814	NM_004256.3|NP_004247.2|C|A|146|coding-nonsynonymous|G|G|146	GGTTTGTGATCGGAAGCACCTGAAGGACACCACACAGTCAGTGTTCATGG[C/G]TGGGCTCCTTGTTGGCACCCTCATGTTTGGGCCCCTCTGCGACCGGTAAG
1205	AM_13161	SLC22A13_c.879G>A(K293K)	rs72551365	snp	N	3	38316933	A // B	A // G	N/A	+	+	SLC22A13	PA32814	NM_004256.3|NP_004247.2|G|K|293|coding-synonymous|A|K|293	TGGCTCCTGACCCGTGGGAGGATGGACGAGGCGATACAACTGATCCAGAA[A/G]GCGGCCTCGGTCAATAGGCGGAAACTCTCCCCGGAGCTCATGAACCAGGT
1206	AM_13162	SLC22A13_c.1443C>G(P481P)	rs72551366	snp	N	3	38318499	A // B	C // G	N/A	+	+	SLC22A13	PA32814	NM_004256.3|NP_004247.2|C|P|481|coding-synonymous|G|P|481	ATCCTCACACCACTTGTGATCCTGCTGGGAGAGTACCACGCTGCCCTCCC[C/G]ATGCTCATCTACGGCAGCCTCCCCATCGTGGCCGGCCTGCTGTGCACCCT
1207	AM_13163	SLC22A13_c.*3670C>T	rs2298419	snp	N	3	38322626	A // B	C // T	N/A	+	+	SLC22A13	PA32814	NM_004256.3||||||||	GGGGGGATGAGGGGCCTAGGACCAACCACTGAGGTGACCTGCAGACACCC[C/T]GAGGGAGGTCTGGTGAAAGAGGAAGGATCTGATGCCCCAGATACCAATAA
1208	AM_13165	SLC22A13_c.*5064C>T	rs1444241	snp	N	3	38324020	A // B	T // C	N/A	+	+	SLC22A13	PA32814	NM_004256.3||||||||	GCACTCCACCTGCCGCAGGAGATGGCCAGACGCCACACCTGAGAACTCAC[A/G]CTTTCTGGGAGGGCAGCCCGCTCCTTCCACAGATTCCCCACAGCCAAACA
1209	AM_13166	SLC22A13_c.*8336G>A	rs4679028	snp	N	3	38327292	A // B	A // G	N/A	+	+	SLC22A13	PA32814	NM_004256.3||||||||	TTATTTCCTGGATCATATGTACAAATGGCTCCCTAGAGTATATACCTGGG[A/G]GTAGCATTGCTGGGTCATAAGGTATACAGGTATTCAACTTTATAAGACAA
1210	AM_13175	SLC22A14_T>C(rs171248)	rs171248	snp	N	3	38363393	A // B	T // C	N/A	+	+	SLC22A14	PA32815	||||||||	GCAGTGTCTCATTCTGATTTTACTTCTCTATTGTGTTCTTTAATTCAGCC[A/G]CTATAGTGTTCATTTCTAGGATTTATGGGTGTCATTTTCCAAGTTTGTGT
1211	AM_13176	SLC22A14_A>C(rs183574)	rs183574	snp	N	3	38363837	A // B	C // A	N/A	+	+	SLC22A14	PA32815	||||||||	GGGAGGTGGTGACTGAGAGAGGAAGGAGGGAGCTTTGGGATGCTGATAAT[G/T]TTCTGTTTCTTCATAAGGGCAATGGATACCCGGTATGTGCTTTGTGATAT
1212	AM_13177	SLC22A14_5030T>G	rs6799737	snp	N	3	38365550	A // B	T // G	N/A	+	+	SLC22A14	PA32815	XM_928664.2|XP_933757.2||||locus-region|||	AAAATGAAGATGAAAGCCTTCTTCACATCATACATGCACACAAAAAAAAC[A/C]GTCTCAGGAAGATTAGATATGTAAATATGAAAGGCAAAAAAAAATTTAGG
1213	AM_13178	SLC22A14_4739C>T	rs6792261	snp	N	3	38365841	A // B	C // T	N/A	+	+	SLC22A14	PA32815	XM_928664.2|XP_933757.2||||locus-region|||	CTCTTGGTATCTAGTAAAGCAAGTTCTCTCATATTGTTTTTTCTTTAAGA[C/T]GGTCTTGGCTTTTCTTGGCTCTTTGCATTTCCATTTAAATCTTAGAATCA
1214	AM_13179	SLC22A14_3709G>T	rs704930	snp	N	3	38366871	A // B	G // T	N/A	+	+	SLC22A14	PA32815	XM_928664.2|XP_933757.2||||intron|||	CAACGTGGCCTTGTATAGCTTACTGCTCCTATAGGTAGCAGGTTAGGAAT[G/T]GCCCTGGGCAGGATGTCCAGGCTCTGTGGGCAGTGCAGGGGACTCTGGGA
1215	AM_13180	SLC22A14_2596A>G	rs149738	snp	N	3	38367984	A // B	G // A	N/A	+	+	SLC22A14	PA32815	XM_928664.2|XP_933757.2||||intron|||	GCCCTGGCCTTTAAAGGTAGCACCAGCCCCCTGCCACCTGTTGGGCACTT[C/T]CCCTGTTCTCTTGAAGAGCATCAGCACTTGGGGTCAGCAGGGTTCCCTGT
1216	AM_13182	CYP8B1_c.1431G>A(P477P)	rs735320	snp	N	3	42915878	A // B	A // G	N/A	-	-	CYP8B1	PA27125	NM_004391.2|NP_004382.2|G|P|477|coding-synonymous|A|P|477	TTTGACTTAGAGTTGGTGGACCCTGACACACCACTACCCCATGTTGACCC[A/G]CAGCGCTGGGGTTTTGGCACCATGCAGCCCAGCCACGATGTGCGCTTCCG
1217	AM_13185	CYP8B1_c.798G>T(G266G)	rs741817	snp	N	3	42916511	A // B	G // T	N/A	-	-	CYP8B1	PA27125	NM_004391.2|NP_004382.2|G|G|266|coding-synonymous|T|G|266	GGCATCAGCAACTGGCTGGGCAACATGCTTCAGTTTCTGAGGGAGCAGGG[G/T]GTACCCTCAGCTATGCAGGACAAGTTCAACTTCATGATGCTCTGGGCCTC
1218	AM_13188	CYP8B1_c.-4519G>A	rs7623741	snp	N	3	42921827	A // B	G // A	N/A	-	-	CYP8B1	PA27125	NM_004391.2||||||||	GGTGTATAGTCTAAACATAATTTTTATATTCCCCGGAAACAAAATTCGTG[C/T]GACTCATTTTACTATGGAGGTTTGAAACCCAACCCGCAATATCTTCGCGG
1219	AM_13189	CYP8B1_c.-4607T>C	rs9816821	snp	N	3	42921915	A // B	C // T	N/A	-	-	CYP8B1	PA27125	NM_004391.2||||||||	GTGTGGCCCAATCAGTGTGGCCTTCCTGACTGCCACCTCCCTTCATGCTC[C/T]GCTCTTCTTTGCAGCATTTGTCACAATTACAGCCATACCGCGAAGATATT
1220	AM_13190	CYP8B1_c.-5165C>T	rs9859496	snp	N	3	42922473	A // B	T // C	N/A	-	-	CYP8B1	PA27125	NM_004391.2||||||||	CGTCCCCTCCTCGCCCCTTCGGTCCGGGAACTGTCAGGGGCCGGGGCGGG[A/G]TTACGATGGTGGGCTAGGGGGCCAGGTAGGACCAAAGACACACGGAGGCG
1221	AM_13191	CYP8B1_c.-5389A>C	rs6771233	snp	N	3	42922697	A // B	A // C	N/A	-	-	CYP8B1	PA27125	NM_004391.2||||||||	GCCCGGAACCACGCCCTTACTGGGGGCTCAGCCGCCGAACTGACACTCAC[A/C]GCTCCTGAGCACAAAGAAGGTGCGAAGTGCCGCAGAGCGACCGCCAGAGG
1222	AM_13192	CYP8B1_c.-6468A>C	rs6774801	snp	N	3	42923776	A // B	C // A	N/A	-	-	CYP8B1	PA27125	NM_004391.2||||||||	TGGAGGGATAGGGTGGGAATTGGAATGATTGGCATTGAGCTTCTAGCCAG[G/T]GGATGGCTCTATGCTGATCATTTCCATCGCCACCAACACCATCACCATTC
1223	AM_13207	NR1I2_c.-1335C>T	rs3814055	snp	N	3	119500035	A // B	C // T	N/A	+	+	NR1I2	PA378	NM_003889.3|||||mrna-utr|||	CAAATGTTCACCTGAAGACAACTGTGGTCATTTTTTGGCAATCCCAGGTT[C/T]TCTTTTCTACCTGTTTGCTCAATCGTGGTCTCCCTCTCCCTCTCTTGTTG
1224	AM_13235	NR1I2_c.34G>A(A12T)	rs1063955	snp	N	3	119526131	A // B	A // G	N/A	+	+	NR1I2	PA378	NM_003889.3|NP_003880.3|G|A|12|coding-nonsynonymous|A|T|12	GAGGCCCAGAAGCAAACCTGGAGGTGAGACCCAAAGAAAGCTGGAACCAT[A/G]CTGACTTTGTACACTGTGAGGACACAGAGTCTGTTCCTGGAAAGCCCAGT
1225	AM_13237	NR1I2_c.79C>T(P27S)	rs12721613	snp	N	3	119526176	A // B	T // C	N/A	+	+	NR1I2	PA378	NM_003889.3|NP_003880.3|C|P|27|coding-nonsynonymous|T|S|27	TACACGGCAGATTTGGGGACCTCCGACTTCCTCATCTGCGTTGACACTGG[A/G]CTTTCCAGGAACAGACTCTGTGTCCTCACAGTGTACAAAGTCAGCATGGT
1226	AM_13238	NR1I2_c.106G>A(G36R)	rs12721607	snp	N	3	119526203	A // B	G // A	N/A	+	+	NR1I2	PA378	NM_003889.3|NP_003880.3|G|G|36|coding-nonsynonymous|A|R|36	GTGATAGCCAGTGGCCTTGTCCCCACATACACGGCAGATTTGGGGACCTC[C/T]GACTTCCTCATCTGCGTTGACACTGGGCTTTCCAGGAACAGACTCTGTGT
1227	AM_13240	NR1I2_c.292C>T(R98C)	rs72551371	snp	N	3	119529002	A // B	C // T	N/A	+	+	NR1I2	PA378	NM_003889.3|NP_003880.3|C|R|98|coding-nonsynonymous|T|C|98	AGGGCGCCTGCGAGATCACCCGGAAGACCCGGCGACAGTGCCAGGCCTGC[C/T]GCCTGCGCAAGTGCCTGGAGAGCGGCATGAAGAAGGAGAGTGAGCAGTGG
1228	AM_13242	NR1I2_c.365G>A(R122Q)	rs12721608	snp	N	3	119530419	A // B	G // A	N/A	+	+	NR1I2	PA378	NM_003889.3|NP_003880.3|G|R|122|coding-nonsynonymous|A|Q|122	CCAGTGGCTGAGTCCCTGTCCGTTCACTTTTCTTCCGCTTGATCAAGGCC[C/T]GCCTCTCCTCCACGGCCTCGTCGGACATGATCACTGCAGGGACAGTGAGG
1229	AM_13243	NR1I2_c.418G>A(V140M)	rs72551372	snp	N	3	119530472	A // B	A // G	N/A	+	+	NR1I2	PA378	NM_003889.3|NP_003880.3|G|V|140|coding-nonsynonymous|A|M|140	CCTTGATCAAGCGGAAGAAAAGTGAACGGACAGGGACTCAGCCACTGGGA[A/G]TGCAGGGGCTGACAGAGGAGCAGCGGATGATGATCAGGGAGCTGATGGAC
1230	AM_13244	NR1I2_c.443G>A(R148Q)	rs72551373	snp	N	3	119530497	A // B	G // A	N/A	+	+	NR1I2	PA378	NM_003889.3|NP_003880.3|G|R|148|coding-nonsynonymous|A|Q|148	TAGTGTCAAAGGTTTTCATCTGAGCGTCCATCAGCTCCCTGATCATCATC[C/T]GCTGCTCCTCTGTCAGCCCCTGCACTCCCAGTGGCTGAGTCCCTGTCCGT
1231	AM_13245	NR1I2_c.488A>G(D163G)	rs72551374	snp	N	3	119530542	A // B	A // G	N/A	+	+	NR1I2	PA378	NM_003889.3|NP_003880.3|A|D|163|coding-nonsynonymous|G|G|163	GCAGCGGATGATGATCAGGGAGCTGATGGACGCTCAGATGAAAACCTTTG[A/G]CACTACCTTCTCCCATTTCAAGAATTTCCGGGTAGGAGGAACTGCACAGT
1232	AM_13253	NR1I2_c.795-93G>A	rs6785049	snp	N	3	119533733	A // B	A // G	N/A	+	+	NR1I2	PA378	NM_003889.3|NP_003880.3||||intron|||	AGCAGCCACAGTCATCCTCAGGGAAAGGAGCCATCCTCCCTCTTCCTCTC[A/G]CCCCCAACTTCTGGATTATGGGATGGCTGCTGGTGCCGGTCTGTGGGCTG
1233	AM_13255	NR1I2_c.879C>T(N293N)	rs4058490	snp	N	3	119533910	A // B	C // T	N/A	+	+	NR1I2	PA378	NM_003889.3|NP_003880.3|C|N|293|coding-synonymous|T|N|293	AAGGGGGCCGCTTTCGAGCTGTGTCAACTGAGATTCAACACAGTGTTCAA[C/T]GCGGAGACTGGAACCTGGGAGTGTGGCCGGCTGTCCTACTGCTTGGAAGA
1234	AM_13256	NR1I2_c.938-17C>T	rs2276707	snp	N	3	119534153	A // B	C // T	N/A	+	+	NR1I2	PA378	NM_003889.3|NP_003880.3||||intron|||	GTGAGGGATGATTAGATCTTGGTCAGCTTGCTGAGAAGCTGCCCCTCCAT[C/T]CTGTTACCATCCACAGGTGGCTTCCAGCAACTTCTACTGGAGCCCATGCT
1235	AM_13258	NR1I2_c.1108G>A(A370T)	rs35761343	snp	N	3	119534626	A // B	A // G	N/A	+	+	NR1I2	PA378	NM_003889.3|NP_003880.3|G|A|370|coding-nonsynonymous|A|T|370	GCCCAGGTGTGCTGCAGCACCGCGTGGTGGACCAGCTGCAGGAGCAATTC[A/G]CCATTACTCTGAAGTCCTACATTGAATGCAATCGGCCCCAGCCTGCTCAT
1236	AM_13259	NR1I2_c.1141C>T(R381W)	rs72551375	snp	N	3	119534659	A // B	C // T	N/A	+	+	NR1I2	PA378	NM_003889.3|NP_003880.3|C|R|381|coding-nonsynonymous|T|W|381	AGCTGCAGGAGCAATTCGCCATTACTCTGAAGTCCTACATTGAATGCAAT[C/T]GGCCCCAGCCTGCTCATAGGTGAGCACAGCAGGGGGTGAGGACCCGTGAG
1237	AM_13260	NR1I2_c.1207A>G(I403V)	rs72551376	snp	N	3	119535961	A // B	A // G	N/A	+	+	NR1I2	PA378	NM_003889.3|NP_003880.3|A|I|403|coding-nonsynonymous|G|V|403	GCAGGTTCTTGTTCCTGAAGATCATGGCTATGCTCACCGAGCTCCGCAGC[A/G]TCAATGCTCAGCACACCCAGCGGCTGCTGCGCATCCAGGACATACACCCC
1238	AM_13282	SLC15A2_c.141C>T(A47A)	rs1143669	snp	N	3	121615288	A // B	C // T	N/A	+	+	SLC15A2	PA35812	NM_021082.2|NP_066568.2|C|A|47|coding-synonymous|T|A|47	CTTCTTGTTGAATAGACAATCTGTGGCTCCAACTATCCACTGAGCATTGC[C/T]TTCATTGTGGTGAATGAATTCTGCGAGCGCTTTTCCTATTATGGAATGAA
1239	AM_13283	SLC15A2_c.170G>A(R57H)	rs1920305	snp	N	3	121615317	A // B	G // A	N/A	+	+	SLC15A2	PA35812	NM_021082.2|NP_066568.2|G|R|57|coding-nonsynonymous|A|H|57	AGGTAGGACTCTTGGACACAAAATTACCTTTCATTCCATAATAGGAAAAG[C/T]GCTCGCAGAATTCATTCACCACAATGAAGGCAATGCTCAGTGGATAGTTG
1240	AM_13298	SLC15A2_c.852G>A(A284A)	rs2293616	snp	N	3	121641693	A // B	G // A	N/A	+	+	SLC15A2	PA35812	NM_021082.2|NP_066568.2|G|A|284|coding-synonymous|A|A|284	TCAAGCCATAAGATGTTTCTGCATTTCCAACTTACTGGATATTTCTCAGC[C/T]GCCCAGTCTAGCCAGTGCTGTCGCTTTGGAATGTCTCCAGAACGGTTCTT
1241	AM_13300	SLC15A2_c.1048C>T(L350F)	rs2257212	snp	N	3	121643804	A // B	T // C	N/A	+	+	SLC15A2	PA35812	NM_021082.2|NP_066568.2|C|L|350|coding-nonsynonymous|T|F|350	CAGACGATAAATGACAAAGTCAAACAACGGGATGAAGATAAGAACCAGAA[A/G]GGGATTTAGAACCTGTAACACCATGATAAAAAGGATTAGCTACAAATATT
1242	AM_13301	SLC15A2_c.1161A>G(A387A)	rs1143670	snp	N	3	121646641	A // B	A // G	N/A	+	+	SLC15A2	PA35812	NM_021082.2|NP_066568.2|A|A|387|coding-synonymous|G|A|387	CCTTTCCACCACAGATCACTTAGGAAAATGGCTGTTGGTATGATCCTAGC[A/G]TGCCTGGCATTTGCAGTTGCGGCAGCTGTAGAGATAAAAATAAATGTGAG
1243	AM_13306	SLC15A2_c.1225C>T(P409S)	rs1143671	snp	Y	3	121647286	A // B	T // C	N/A	+	+	SLC15A2	PA35812	NM_021082.2|NP_066568.2|C|P|409|coding-nonsynonymous|T|S|409	CTCATCATCTGCCAGATTCAAGACTTGTAGGAAAACCTCCTGGGGACCTG[A/G]CTGGGCTGGGGCCATTTCCTTAGAGCAAAGAACACATGTCAGAATCACCA
1244	AM_13307	SLC15A2_c.1526G>A(R509K)	rs1143672	snp	N	3	121648168	A // B	A // G	N/A	+	+	SLC15A2	PA35812	NM_021082.2|NP_066568.2|G|R|509|coding-nonsynonymous|A|K|509	TGTTACTGATTTTTACTTTCCTCTGTTGTAGGTAAAGGATACAGAAAGCA[A/G]AACAACCAATGGGATGACAACCGTGAGGTTTGAATGTCAATGAGATTCCA
1245	AM_13315	SLC15A2_c.2110A>C(M704L)	rs1920314	snp	N	3	121659774	A // B	C // A	N/A	+	+	SLC15A2	PA35812	NM_021082.2|NP_066568.2|A|M|704|coding-nonsynonymous|C|L|704	GATCATGTTCCCCTGGATGTGAGGAATGTGCTTATCTGCTGGACCCCGCA[G/T]ATCCTCTGTCTTTACAGGAACATAGTAGTAGCCCATGATGGAGAAGATCA
1246	AM_13316	SLC15A2_c.*6C>T(3'UTR)	rs1920313	snp	N	3	121659860	A // B	T // C	N/A	+	+	SLC15A2	PA35812	NM_021082.2|||||mrna-utr|||	AAAAATGCTTCAAGACAGGGCCAGGAATTGGGGTCAGGACAGAATCTAGG[A/G]AGTCATCAGAGTTTTGTCTTCTTGGTCTCTAGTTTGATCATGTTCCCCTG
1247	AM_13318	SLC15A2_c.*146T>G(3'UTR)	rs4388019	snp	N	3	121660000	A // B	G // T	N/A	+	+	SLC15A2	PA35812	NM_021082.2|||||mrna-utr|||	CAGAGCTGATCTCCTCCACCTTTCTCCAATGACAGAAGTTCCAGGACTGG[G/T]TTTCCAGTACATCTTTAAACAAGGCCCCAGAGACTCTATGTCTGCCCGTC
1248	AM_13323	CHST13_c.97+3926A>T	rs3856650	snp	N	3	126247198	A // B	A // T	N/A	+	+	CHST13	PA134976803	NM_152889.1|NP_690849.1||||intron|||	GGCAAGGTTGCAGGGGTTACAGAAAAGCAAAAAGTCCCCTTCCATGTAGA[A/T]CTGACCTTCCAGAGTGATCAACCTACACAGAACTCAAAAGATTTCAGCAA
1249	AM_13324	CHST13_c.98-5237A>C	rs4305381	snp	N	3	126249877	A // B	A // C	N/A	+	+	CHST13	PA134976803	NM_152889.1|NP_690849.1||||intron|||	CACGCAGCAGGGTTCTGGACAATGGGCTTTAGGGTTCTGGAGGCCAGTGC[A/C]AGGCCCGTCCAGCTGCCATCTATTCCTTCCACGAACCTCTGTTTATTCAG
1250	AM_13325	CHST13_c.180+1473T>G	rs6783962	snp	N	3	126256669	A // B	G // T	N/A	+	+	CHST13	PA134976803	NM_152889.1|NP_690849.1||||intron|||	AACAAGTGCTGATCACGTGCCAGGCCCTTTAGTTCTGTGGACTAATTACG[G/T]CAACCCATAAGGTGGGGCCGTTGTCCCTGTTTACAGACAAGGACACAGGC
1251	AM_13326	CHST13_c.180+2676G>C	rs1873397	snp	N	3	126257872	A // B	C // G	N/A	+	+	CHST13	PA134976803	NM_152889.1|NP_690849.1||||intron|||	CCCTGGGTGTCCTTCCAGACATGCTCTAGGCGTGTAAGTAGTATCCACTG[C/G]TTTGCCGTGTGCTTACAGTAACTTCTTGAGAATCTCACCTACAGGCATGT
1252	AM_13333	CHST13_c.950G>A(R317Q)	rs1056522	snp	N	3	126261345	A // B	G // A	N/A	+	+	CHST13	PA134976803	NM_152889.1|NP_690849.1|G|R|317|coding-nonsynonymous|A|Q|317	CGGAGTAGTTGAAAAGCAGGAAGTCCATCTTGTAGAGGTCGAAGAGGCGC[C/T]GCTGGTAGAAGGGGCTGATGTCCCGGAAGAGGCGCGCTGCCAGGTCGCGG
1253	AM_13334	CHST13_c.*671G>C	rs1054097	snp	N	3	126262092	A // B	C // G	N/A	+	+	CHST13	PA134976803	NM_152889.1|||||mrna-utr|||	GAGCCCCTGGTGCAATGCGGTCACAGGTTTTATGGGACTTTGGTGAGCTG[C/G]GCGGTCATGGTTTTGAAATAAATGTATTTTGTTACTTTCTGATTTTTTGG
1254	AM_13337	CHST2_-2693G>A	rs3755740	snp	N	3	142836966	A // B	G // A	N/A	+	+	CHST2	PA26502	NM_004267.3|NP_004258.2||||locus-region|||	AATTGAGCGACTCCCCATCTTTTCCTTTTCTGGAATCCCCAGCCTCCCTT[C/T]GCCTACTCTCTCAAATGCCCCTGCCCCTTTTTCACCACCTCTTTTACCAC
1255	AM_13338	CHST2_-2387G>A	rs3755739	snp	N	3	142837272	A // B	G // A	N/A	+	+	CHST2	PA26502	NM_004267.3|NP_004258.2||||locus-region|||	CAGAATCCCCTGAGTACAAAGACTTGAAAAGTGACTTAACTCGCTTTCCA[C/T]GGGTTTTTAACTCTCTTACGGATTTAGTTTCAGGGGAGAAAAATGTTCAA
1256	AM_13339	CHST2_-2298T>A	rs4683739	snp	N	3	142837361	A // B	A // T	N/A	+	+	CHST2	PA26502	NM_004267.3|NP_004258.2||||locus-region|||	CAGGGGATTCTGTAAGACTCATGGAAGAATAATGGCGCAAACAGCAATAT[A/T]TTAATGTTAGAACGGTCCTCTGAAAAGTCTGCCCGAAACGCTACAAAGAT
1257	AM_13342	CHST2_-346G>C	rs1473870	snp	N	3	142839313	A // B	C // G	N/A	+	+	CHST2	PA26502	NM_004267.3|||||mrna-utr|||	CCTCGAAGGTGCGGGGACCCCCAGCGGAAGCGAGAGGGAGCGAAATCGAG[C/G]AACGAGTGACAGCCGGACAGTCCGCCGGGCGGTGATCCGGGGCCGCTCCC
1258	AM_13346	CHST2_2082C>T	rs6664	snp	N	3	142841740	A // B	C // T	N/A	+	+	CHST2	PA26502	NM_004267.3|||||mrna-utr|||	AACAAAAAGCCCCATTGGGCATGATAAGCCGAGGAGGCATTCTTCTAAAG[C/T]AGACTTTTGTGTAAAAAGCAAAGGTTACATGTGAGTATTAATAAAGAAGA
1259	AM_13364	ABCC5_c.*1366A>C	rs3805114	snp	N	3	183637722	A // B	A // C	N/A	-	-	ABCC5	PA395	NM_005688.2|||||mrna-utr|||	TGGAAGCAAAAATCTGAAAATGTGAATAAAATTATTTTGGATTTTGTAAA[A/C]CTCTTCGTGTATCAAACAATTCTCTGGGAAGGGAGTGAGATATCCCTGAA
1260	AM_13365	ABCC5_c.*1243G>A	rs562	snp	N	3	183637845	A // B	A // G	N/A	-	-	ABCC5	PA395	NM_005688.2|||||mrna-utr|||	TTGTGCTGTGGGGCTGGTAGCTCAGGTGGGCGTGGTCACTGCTGTCATCA[A/G]TTGAATGGTCAGCGTTGCATGTCGTGACCAACTAGACATTCTGTCGCCTT
1261	AM_13370	ABCC5_c.4148C>A(T1383N)	rs1053387	snp	N	3	183643407	A // B	A // C	N/A	-	-	ABCC5	PA395	NM_005688.2|NP_005679.2|C|T|1383|coding-nonsynonymous|A|N|1383	ATTGATTCAAGAGACCATCCGAGAAGCATTTGCAGACTGTACCATGCTGA[A/C]CATTGCCCATCGCCTGCACACGGTTCTAGGCTCCGATAGGATTATGGTGC
1262	AM_13377	ABCC5_c.3624C>T(L1208L)	rs3749442	snp	N	3	183660585	A // B	C // T	N/A	-	-	ABCC5	PA395	NM_005688.2|NP_005679.2|C|L|1208|coding-synonymous|T|L|1208	GAGGTGACCTTTGAGAACGCAGAGATGAGGTACCGAGAAAACCTCCCTCT[C/T]GTCCTAAAGAAAGTATCCTTCACGATCAAACCTAAAGAGAAGATTGGCAT
1263	AM_13378	ABCC5_c.3606C>A(Y1202X)	rs1053351	snp	N	3	183660603	A // B	A // C	N/A	-	-	ABCC5	PA395	NM_005688.2|NP_005679.2|C|Y|1202|coding-nonsynonymous|A|X|1202	GACTGGCCCCAGGAGGGAGAGGTGACCTTTGAGAACGCAGAGATGAGGTA[A/C]CGAGAAAACCTCCCTCTCGTCCTAAAGAAAGTATCCTTCACGATCAAACC
1264	AM_13381	ABCC5_c.3441_3442insC(V1147X)	rs72551384	in-del	N	3	183663700	A // B	C // CC	N/A	-	-	ABCC5	PA395	NM_005688.2|NP_005679.2|C|V|1147|coding-nonsynonymous|CC|X|1147	TTGATCCTCTCCACCGAGGTGAATCGAGCTTCTGTCTCAGATGCCAGTCT[G/GG]ACCGTAAACTGGAACAGCCCCGTTAACTGATAATGGAAAACAACAATCAA
1265	AM_13393	ABCC5_c.1782C>T(C594C)	rs939336	snp	N	3	183685534	A // B	T // C	N/A	-	-	ABCC5	PA395	NM_005688.2|NP_005679.2|C|C|594|coding-synonymous|T|C|594	TGGCCTAAAATGGCTGAAATGAGAGAGGTTTTTCCACTTCCCACACTGCC[A/G]CAGATTCCAACCAGTTTACCCTGGACAAGGCACACAGAGAGGAGGGTCAT
1266	AM_13397	ABCC5_c.1200C>T(S400S)	rs1053386	snp	N	3	183696387	A // B	C // T	N/A	-	-	ABCC5	PA395	NM_005688.2|NP_005679.2|C|S|400|coding-synonymous|T|S|400	ATCCGCGAGGAGGAGCGTCGGATATTGGAAAAAGCTGGGTACTTCCAGAG[C/T]ATCACTGTGGGTGTGGCTCCCATTGTGGTGGTGATTGCCAGCGTGGTGAC
1267	AM_13400	ABCC5_c.1146A>G(Q382Q)	rs7636910	snp	N	3	183699516	A // B	G // A	N/A	-	-	ABCC5	PA395	NM_005688.2|NP_005679.2|A|Q|382|coding-synonymous|G|Q|382	GAATCCAAGGTCCTTCTACCACATGCACATACAAAATCTTTAAACTCACT[C/T]TGAACACTCTGAGAAAATGCTTTGACCCAGGCATACATTTTGATAAATTT
1268	AM_13423	UGT2B17_c.1348C>T(H450Y)	rs72551385	snp	N	4	69403588	A // B	C // T	N/A	-	-	UGT2B17	PA37189	NM_001077.3|NP_001068.1|C|H|450|coding-nonsynonymous|T|Y|450	TATATTTATCCTTCAGCTATAAAGAGAATATCATGAAATTATCAAGAATT[C/T]ATCATGATCAACCGGTGAAGCCCCTGGATCGAGCAGTCTTCTGGATTGAG
1269	AM_13425	UGT2B17_c.1313+840A>G	rs7436962	snp	N	4	69415555	A // B	G // A	N/A	-	-	UGT2B17	PA37189	NM_001077.3|NP_001068.1||||intron|||	TCCTAGCCTCTCCTCAAAAGAAGTAAAAACATATTTTTACACAGAAAATA[C/T]GTATAACAATATTCGTAAGTGCCAAAATTGGAAAGACCTAAAATGTCCAT
1270	AM_13427	UGT2B17_c.1065T>C(Y355Y)	rs28374627	snp	N	4	69417570	A // B	T // C	N/A	-	-	UGT2B17	PA37189	NM_001077.3|NP_001068.1|T|Y|355|coding-synonymous|C|Y|355	TATTTGTTCTCCAGAGTCTTACCAAGAAGGTCATTCTGGGGTAACCACTT[A/G]TACAGTCGAGTATTGGAACCTAAAGTATTTGGCTTCTTGCCATCAAATCT
1271	AM_13428	UGT2B17_c.1006-2603T>C	rs4860305	snp	N	4	69420232	A // B	C // T	N/A	-	-	UGT2B17	PA37189	NM_001077.3|NP_001068.1||||intron|||	GAAATTTAGCTATGAGATAAAAAAAAATCACCAGCTTGCAGACAAAAACC[C/T]GTTGAATCAAAACAGTGGTTTTTAACTTAATAGAAAAATAAAAGCAAATT
1272	AM_13437	UGT2B15_c.1568A>C(K523T)	rs4148269	snp	N	4	69512847	A // B	A // C	N/A	-	-	UGT2B15	PA37188	NM_001076.2|NP_001067.2|A|K|523|coding-nonsynonymous|C|T|523	ATTTATCATCACAAAATTTTGCCTGTTTTGTTTCCGAAAGCTTGCCAAAA[A/C]AGGAAAGAAGAAGAAAAGAGATTAGTTATATCAAAAGCCTGAAGTGGAAT
1273	AM_13439	UGT2B15_c.253G>T(D85Y)	rs1902023	snp	N	4	69536084	A // B	G // T	N/A	-	-	UGT2B15	PA37188	NM_001076.2|NP_001067.2|G|D|85|coding-nonsynonymous|T|Y|85	AATCATCTGCTATTAAATTAGAAGTTTATCCTACATCTTTAACTAAAAAT[G/T]ATTTGGAAGATTCTCTTCTGAAAATTCTCGATAGATGGATATATGGTGTT
1274	AM_13441	UGT2B15_c.*185A>T(3'UTR)	rs4148271	snp	N	4	69512637	A // B	T // A	N/A	-	-	UGT2B15	PA37188	NM_001076.2|||||mrna-utr|||	TCCAAATGCTATCCTTCCCCCCATTGTATTTTTCATAGCTTAAAAATCAT[A/T]GACATAGAATAATTCCAGCTAAAGTACGTATTAAATCCCTGGAAAATAAA
1275	AM_13442	UGT2B15_c.*168C>T(3'UTR)	rs3100	snp	N	4	69512655	A // B	T // C	N/A	-	-	UGT2B15	PA37188	NM_001076.2|||||mrna-utr|||	CCCCATTGTATTTTTCATAGCTTAAAAATCATTGACATAGAATAATTCCA[A/G]CTAAAGTACGTATTAAATCCCTGGAAAATAAATTTTGTCTTAACAAGGTA
1276	AM_13443	UGT2B15_c.*131C>G(3'UTR)	rs72551389	snp	N	4	69512692	A // B	C // G	N/A	-	-	UGT2B15	PA37188	NM_001076.2||||||||	TTTCCTTTTTCCTGTGACAAAACATCTTTTCACAACTTACCTTGTTAAGA[C/G]AAAATTTATTTTCCAGGGATTTAATACGTACTTTAGCTGGAATTATTCTA
1277	AM_13444	UGT2B15_c.1568A>C(K523T)	rs4148269	snp	N	4	69512847	A // B	A // C	N/A	-	-	UGT2B15	PA37188	NM_001076.2|NP_001067.2|A|K|523|coding-nonsynonymous|C|T|523	ATTTATCATCACAAAATTTTGCCTGTTTTGTTTCCGAAAGCTTGCCAAAA[A/C]AGGAAAGAAGAAGAAAAGAGATTAGTTATATCAAAAGCCTGAAGTGGAAT
1278	AM_13445	UGT2B15_c.1498G>A(A500T)	rs72551390	snp	N	4	69512917	A // B	A // G	N/A	-	-	UGT2B15	PA37188	NM_001076.2|NP_001067.2|G|A|500|coding-nonsynonymous|A|T|500	ACCTCACCTGGATCCAGTACCACTCTTTGGATGTGATAGCATTCCTGCTG[A/G]CCTGCGTGGCAACTGTGATATTTATCATCACAAAATTTTGCCTGTTTTGT
1279	AM_13458	UGT2B7*2_c.-327G>A(Promoter)	rs7662029	snp	N	4	69961912	A // B	A // G	N/A	+	+	UGT2B7	PA361	NM_001074.2|NP_001065.2||||locus-region|||	ATGTTTAGTCATTTAATCTTTAGTTTTGTGTCAAATGGACTGCAGAAACA[A/G]GATCTGTCACTGCTACTGTTCTGGACACTCTTCTAAAATATATTGCATAA
1280	AM_13459	UGT2B7*2_c.-161C>T(Promoter)	rs7668258	snp	N	4	69962078	A // B	C // T	N/A	+	+	UGT2B7	PA361	NM_001074.2|NP_001065.2||||locus-region|||	GGGAAATTAATCACATCTGTGTGAACAGATCATTTACCTTCATTTGTCTC[C/T]TTGCCATCCACATGCTCAGACTGTTGATTTAATGATATTGTATGTACTTT
1281	AM_13460	UGT2B7*3_c.211G>T(A71S)	rs12233719	snp	N	4	69962449	A // B	G // T	N/A	+	+	UGT2B7	PA361	NM_001074.2|NP_001065.2|G|A|71|coding-nonsynonymous|T|S|71	CTGTACTGGCATCTTCAGCTTCCATTCTTTTTGATCCCAACAACTCATCC[G/T]CTCTTAAAATTGAAATTTATCCCACATCTTTAACTAAAACTGAGTTGGAG
1282	AM_13463	UGT2B7_c.735A>G(T245T)	rs28365062	snp	N	4	69964271	A // B	A // G	N/A	+	+	UGT2B7	PA361	NM_001074.2|NP_001065.2|A|T|245|coding-synonymous|G|T|245	TTGTGTCATCCACCTTTTTTTTTTCTATTCCTGTCAGGAAGACCCACTAC[A/G]TTATCTGAGACAATGGGGAAAGCTGACGTATGGCTTATTCGAAACTCCTG
1283	AM_13464	UGT2B7*2_c.801T>A(P267P)	rs7438284	snp	N	4	69964337	A // B	T // A	N/A	+	+	UGT2B7	PA361	NM_001074.2|NP_001065.2|T|P|267|coding-synonymous|A|P|267	GGTTTGCAGTGGAGTCCTCCAACAAAATCAACATTTGGTAAGAGTGGATA[A/T]GGAAACTGAAAATTCCAGGAGTTTCGAATAAGCCATACGTCAGCTTTCCC
1284	AM_13465	UGT2B7*2_c.802C>T(H268Y)	rs7439366	snp	N	4	69964338	A // B	C // T	N/A	+	+	UGT2B7	PA361	NM_001074.2|NP_001065.2|C|H|268|coding-nonsynonymous|T|Y|268	GGAAAGCTGACGTATGGCTTATTCGAAACTCCTGGAATTTTCAGTTTCCA[C/T]ATCCACTCTTACCAAATGTTGATTTTGTTGGAGGACTCCACTGCAAACCT
1285	AM_13468	UGT2B7_c.1062C>T(Y354Y)	rs4348159	snp	N	4	69972952	A // B	C // T	N/A	+	+	UGT2B7	PA361	NM_001074.2|NP_001065.2|C|Y|354|coding-synonymous|T|Y|354	AGATTTGATGGGAATAAACCAGATACCTTAGGTCTCAATACTCGGCTCTA[C/T]AAGTGGATACCCCAGAATGACCTTCTAGGTAAGACTCTGGTGAACAAATA
1286	AM_13471	UGT2B11_c.1429C>A(R477R)	rs72551394	snp	N	4	70066319	A // B	A // C	N/A	-	-	UGT2B11	PA37187	NM_001073.1|NP_001064.1|C|R|477|coding-synonymous|A|R|477	CAGTCTTCTGGATTGAATTTGTCATGCCCCACAAAGGAGCCAAACACCTT[A/C]GAGTTGCAGCCCATGACCTCACCTGGTTCCAGTACCACTCTTTGGATGTG
1287	AM_13472	UGT2B11_c.T>A(G364G)	rs72551395	snp	N	4	70070366	A // B	A // T	N/A	-	-	UGT2B11	PA37187	NM_001073.1|NP_001064.1|T|G|364|coding-synonymous|A|G|364	TCTCATTTTATTCCTATGAATAATTTTGCTAAAATTCATCCAATCCTAGG[A/T]CATCCAAAAACCAGAGCTTTTATAACTCATGGTGGAGCCAATGGCATCTA
1288	AM_13473	UGT2B11_c.G>A(G364D)	rs72551396	snp	N	4	70070367	A // B	A // G	N/A	-	-	UGT2B11	PA37187	NM_001073.1|NP_001064.1|G|G|364|coding-nonsynonymous|A|D|364	ATCTCATTTTATTCCTATGAATAATTTTGCTAAAATTCATCCAATCCTAG[A/G]TCATCCAAAAACCAGAGCTTTTATAACTCATGGTGGAGCCAATGGCATCT
1289	AM_13475	UGT2B11_c.866C>T(P289L)	rs3890590	snp	N	4	70078295	A // B	T // C	N/A	-	-	UGT2B11	PA37187	NM_001073.1|NP_001064.1|C|P|289|coding-nonsynonymous|T|L|289	TGAAACTTCGAAGCCAACAAAATAAAACCAACAAAAGTATGTTTACCTTA[A/G]GTAGGGGTTTGGCAGGTTTGCAGTGGAATCCTCCAACAAAATCAACGTTT
1290	AM_13478	UGT2B11_c.466T>C(C156R)	rs7697037	snp	N	4	70079975	A // B	C // T	N/A	-	-	UGT2B11	PA37187	NM_001073.1|NP_001064.1|T|C|156|coding-nonsynonymous|C|R|156	AACTACAAGAGTCAAGATTTGACATCGTTTTTGCAGATGCTGTTTTTCCC[C/T]GTGGTGAGCTGCTGGCTGCGCTACTTAACATACGGTTTGTGTACAGTCTC
1291	AM_13496	UGT2B28_c.1322A>G(N441S)	rs41292949	snp	N	4	70160259	A // B	A // G	N/A	+	+	UGT2B28	PA37779	NM_053039.1|NP_444267.1|A|N|441|coding-nonsynonymous|G|S|441	CTTACTTTCAGTGTTGGTATCTTTATTTTTATCCTTCAGATATAAAGAGA[A/G]TGTTATGAAATTATCAATAATTCAACATGATCAACCAGTAAAGCCCCTGC
1292	AM_13498	UGT2B28_c.1362G>A(V454V)	rs41292951	snp	N	4	70160299	A // B	G // A	N/A	+	+	UGT2B28	PA37779	NM_053039.1|NP_444267.1|G|V|454|coding-synonymous|A|V|454	TTGTGGCACATCACAAATTCAATCCAGAAGACTGCTCGATGCAGGGGCTT[C/T]ACTGGTTGATCATGTTGAATTATTGATAATTTCATAACATTCTCTTTATA
1293	AM_13499	UGT2B28_c.1372C>G(H458D)	rs6828191	snp	N	4	70160309	A // B	C // G	N/A	+	+	UGT2B28	PA37779	NM_053039.1|NP_444267.1|C|H|458|coding-nonsynonymous|G|D|458	ATGTTATGAAATTATCAATAATTCAACATGATCAACCAGTAAAGCCCCTG[C/G]ATCGAGCAGTCTTCTGGATTGAATTTGTGATGTGCCACAAAGGAGCCAAA
1294	AM_13507	UGT2B4_c.*448A>G	rs1131878	snp	N	4	70345904	A // B	A // G	N/A	-	-	UGT2B4	PA360	NM_021139.2|||||mrna-utr|||	TTTGGATCCATTTCATGCAGGATTGTGTTGTTTTAACTGTTGTTGAGGAA[A/G]CTAATAAATAATTAAATTGTATAGAAAGTCTCTTCCTCTTGATATTTTGA
1295	AM_13508	UGT2B4_c.*295A>C	rs1051752	snp	N	4	70346057	A // B	A // C	N/A	-	-	UGT2B4	PA360	NM_021139.2|||||mrna-utr|||	TTGAGCTTATATTGAAATTTATTGTTCCAATTCACAGGTTACATGAAAAA[A/C]AATTTACTAAGCTTAACTACATGTCACACATTGTACATGGAAACAAGAAC
1296	AM_13509	UGT2B4_c.*225T>C	rs1966151	snp	N	4	70346127	A // B	T // C	N/A	-	-	UGT2B4	PA360	NM_021139.2|||||mrna-utr|||	ATTGGAACAATAAATTTCAATATAAGCTCAATACATTTCAATATAACCTC[A/G]TATGGCTTTATATCATTTTTGTTTTCCCTAATGTTTTCCTCCTTGACATG
1297	AM_13511	UGT2B4_c.1375C>A(R459R)	rs13142440	snp	N	4	70346564	A // B	A // C	N/A	-	-	UGT2B4	PA360	NM_021139.2|NP_066962.2|C|R|459|coding-synonymous|A|R|459	CTATGAAATTATCAAGAATTCATCATGATCAACCAGTGAAGCCCCTTGAT[A/C]GAGCAGTCTTCTGGATTGAATTTGTCATGCGCCATAAAGGAGCCAAGCAC
1298	AM_13513	UGT2B4_c.1374T>A(D458E)	rs13119049	snp	N	4	70346565	A // B	A // T	N/A	-	-	UGT2B4	PA360	NM_021139.2|NP_066962.2|T|D|458|coding-nonsynonymous|A|E|458	GCTATGAAATTATCAAGAATTCATCATGATCAACCAGTGAAGCCCCTTGA[A/T]CGAGCAGTCTTCTGGATTGAATTTGTCATGCGCCATAAAGGAGCCAAGCA
1299	AM_13517	UGT2B4_c.1186T>C(F396L)	rs72552707	snp	N	4	70351050	A // B	T // C	N/A	-	-	UGT2B4	PA360	NM_021139.2|NP_066962.2|T|F|396|coding-nonsynonymous|C|L|396	AGCTGCTCCCTTGGCCTTCATGTGTGCAATGTTATCAGGTTGATCTGCAA[A/G]CAATGGAACGCCCACCATAGGGATTCCATGGTAGATTGCCTCATAGATGC
1300	AM_13518	UGT2B4_c.948G>A(T316T)	rs1845555	snp	N	4	70355211	A // B	A // G	N/A	-	-	UGT2B4	PA360	NM_021139.2|NP_066962.2|G|T|316|coding-synonymous|A|T|316	GGAGAAAATGGTGTTGTGGTGTTTTCTCTGGGGTCGATGGTCAGTAACAC[A/G]TCAGAAGAAAGGGCCAATGTAATTGCATCAGCCCTTGCCAAGATCCCACA
1301	AM_13530	UGT2A1_c.*99G>A	rs4148311	snp	N	4	70454991	A // B	A // G	N/A	-	-	UGT2A1	PA37184	NM_006798.2|||||mrna-utr|||	GAGTAGTGTAGTCCTATTAATTCCAGACAAAAGGAGTTTAACAAAAACAC[A/G]TCTCCCATCCTGTTTCCAAATTTTCTATTTCTCTACCTGCGATAAGCCTA
1302	AM_13531	UGT2A1_c.1524A>G(Q508Q)	rs4148310	snp	N	4	70455150	A // B	A // G	N/A	-	-	UGT2A1	PA37184	NM_006798.2|NP_006789.2|A|Q|508|coding-synonymous|G|Q|508	ATTGGGTTCTTGCTGGTCTGTGTGACAACGGCTATATTTTTGGTCATACA[A/G]TGTTGTTTGTTTTCCTGTCAAAAATTTGGTAAGATAGGAAAGAAGAAAAA
1303	AM_13534	UGT2A1_c.1305-109A>C	rs2288741	snp	N	4	70455478	A // B	A // C	N/A	-	-	UGT2A1	PA37184	NM_006798.2|NP_006789.2||||intron|||	CTTAAAATCCTATACAACTAACAAAGTTCATGCAAGAATTATATTTTCTC[A/C]ACGTAACTATGGCCTTAAACTTGTAGAGCAAAAGTGTATCACATATTTAT
1304	AM_13535	UGT2A1_c.1171G>A(V391I)	rs4148304	snp	N	4	70460328	A // B	A // G	N/A	-	-	UGT2A1	PA37184	NM_006798.2|NP_006789.2|G|V|391|coding-nonsynonymous|A|I|391	GAACTAATGGGATCTACGAAGCTATTTACCACGGAGTCCCTATGGTGGGA[A/G]TTCCCATGTTTGCTGATCAGCCTGATAACATTGCTCACATGAAGGCCAAA
1305	AM_13536	UGT2A1_c.922G>A(G308R)	rs4148301	snp	N	4	70462042	A // B	A // G	N/A	-	-	UGT2A1	PA37184	NM_006798.2|NP_006789.2|G|G|308|coding-nonsynonymous|A|R|308	AAGAATTTATCCAGAGCTCAGGTAAAAATGGTGTTGTGGTGTTTTCTCTG[A/G]GATCAATGGTCAAAAACCTTACAGAAGAAAAGGCCAATCTTATTGCCTCA
1306	AM_13558	UGT2A1_c.715+13414A>G	rs11249454	snp	N	4	70499234	A // B	A // G	N/A	-	-	UGT2A1	PA37184	NM_006798.2|NP_006789.2||||intron|||	CATTCTACTGCTGATGGAAATTTAGGCTATTTTGGTTTTGCCACCTTATG[A/G]TGAACACTGCTTTGAACATTCTTGTACCTAATATTGGTGAATACATGTAT
1307	AM_13572	UGT2A1_c.224G>A(R75K)	rs1347046	snp	N	4	70513139	A // B	A // G	N/A	-	-	UGT2A1	PA37184	NM_006798.2|NP_006789.2|G|R|75|coding-nonsynonymous|A|K|75	ACTTTTCATCACACCAACCTCTAACCCATCTCTGACATTTGAAATATATA[A/G]GGTGCCCTTTGGCAAAGAAAGAATAGAAGGAGTAATTAAGGACTTCGTTT
1308	AM_13591	SULT1B1_c.612A>C(E204D)	rs4149416	snp	N	4	70596385	A // B	A // C	N/A	-	-	SULT1B1	PA415	NM_014465.3|NP_055280.2|A|E|204|coding-nonsynonymous|C|D|204	TACTTGTTTATTGTCTTGGGTTTTACCCACTAATAGAATCCAAAGGAGGA[A/C]ATCAAGAAGATCATTAGATTTCTAGAGAAGAACCTGAATGATGAGATCTT
1309	AM_13600	SULT1B1_c.376-2858G>A	rs11731028	snp	N	4	70602840	A // B	G // A	N/A	-	-	SULT1B1	PA415	NM_014465.3|NP_055280.2||||intron|||	TAAAGATGAATAAAACTCTTAGAAAAAAAAGCCAGATATACAGCACATTG[C/T]ATAATAAAAATCACCAATTCAAATGACAAGTTTCTCATCTAAAACCATGA
1310	AM_13602	SULT1B1_c.376-6044C>T	rs11249460	snp	N	4	70606026	A // B	C // T	N/A	-	-	SULT1B1	PA415	NM_014465.3|NP_055280.2||||intron|||	TACCTGCTTCTCCTTTGCCTTCCACCATGATTGTAAGTTTCCTGGGGCCT[C/T]GCAAGCAATAGGAAACTGTGAGTCAACTAAACTTCTTTCCTTTATAAATA
1311	AM_13603	SULT1B1_c.375+4320T>C	rs1604741	snp	N	4	70611119	A // B	C // T	N/A	-	-	SULT1B1	PA415	NM_014465.3|NP_055280.2||||intron|||	CAATGATAAAAGATTCAATTCAACAAGAAGGTGTAACTGTTCTAAATACA[C/T]ATGCATCCAACTTTAGAGCATCTAAATTCATAAAACTGGTTCTTATAGAC
1312	AM_13604	SULT1B1_c.326A>G(H109R)	rs57806190	snp	N	4	70615488	A // B	A // G	N/A	-	-	SULT1B1	PA415	NM_014465.3|NP_055280.2|A|H|109|coding-nonsynonymous|G|R|109	AGGTATAGAACAATTGGAGAAGAATCCATCACCCCGGATTGTGAAAACAC[A/G]TCTACCGACTGATCTTCTTCCTAAATCTTTCTGGGAAAACAATTGCAAGG
1313	AM_13605	SULT1B1_c.-44-95T>C	rs11569731	snp	N	4	70621074	A // B	C // T	N/A	-	-	SULT1B1	PA415	NM_014465.3|NP_055280.2||||intron|||	TAATGCCCACAAAATATGCCCTTTGTACTTAGATCTCCATGTGCGCAGAA[C/T]GTTAAAGGCCAATTTTACTTTGTGACAAATTGCAGTGTCTTAAGACCAAC
1314	AM_13632	SULT1E1_c.-9-469A>G	rs3822172	snp	N	4	70723840	A // B	A // G	N/A	-	-	SULT1E1	PA340	NM_005420.2|NP_005411.1||||intron|||	ACATTCACCAAGCATTTGGTTTATTTAAAAAAATGATACATATTCAGGAA[A/G]TCAAAAATCTCTGACTTAGATACCCGGCAATAATAATCAAATGTAATGAT
1315	AM_13633	SULT1E1_c.-9-682A>G	rs4149528	snp	N	4	70724053	A // B	A // G	N/A	-	-	SULT1E1	PA340	NM_005420.2|NP_005411.1||||intron|||	CATGGGATCAGGAGATGAATTAGGAAATGATAACCATCTTGCTTAACCTT[A/G]TCATTTTTAGCCAAGTCATTCAATGGGAGTATCCACTACCTTATTGATCG
1316	AM_13634	SULT1E1_c.-9-899G>A	rs3775770	snp	N	4	70724270	A // B	A // G	N/A	-	-	SULT1E1	PA340	NM_005420.2|NP_005411.1||||intron|||	TTATCAGGCAGGTTTTTGGGCAAATGTGAACAGGAGGAAGATCTAGAAAG[A/G]CTAATGTCAGGAAAGACAAAATGTGTTGGGAAGCTATGTCAGAAACTTGA
1317	AM_13635	SULT1E1_c.-10+311G>C	rs1881668	snp	N	4	70725456	A // B	C // G	N/A	-	-	SULT1E1	PA340	NM_005420.2|NP_005411.1||||intron|||	GCTGAATGCTGGACGTGTTCTCCATTTTACCAATGAGAAAATAAAGCAAG[C/G]AGGGTAGAAGGAGGTAGAATAGAGATTGACTTTTAGTTTTGTGTTCCTGT
1318	AM_13637	SULT1E1_c.-64G>A	rs3736599	snp	N	4	70725821	A // B	G // A	N/A	-	-	SULT1E1	PA340	NM_005420.2|||||mrna-utr|||	TTAGTTGATCCTGTGAAAGAAATTGATCTAGTTTATATCTCTTCAAATAC[C/T]AAGGCAGATCTTAAGCTGCAAAAAAAGATGAGAACCACTTCTGCATTTGG
1319	AM_13643	DCK_c.70A>G(I24V)	rs66878317	snp	Y	4	71859622	A // B	A // G	N/A	+	+	DCK	PA137	NM_000788.2|NP_000779.1|A|I|24|coding-nonsynonymous|G|V|24	GAAGCTGCCCGTCTTTCTCAGCCAGCTCTGAGGGGACCCGCATCAAGAAA[A/G]TCTCCATCGAAGGGAACATCGGTAAGGAGCCTCCGGAAATGTGGGACGCA
1320	AM_13644	DCK_c.356C>G(A119G)	rs66472932	snp	N	4	71888232	A // B	C // G	N/A	+	+	DCK	PA137	NM_000788.2|NP_000779.1|C|A|119|coding-nonsynonymous|G|G|119	CAGTCGAATAAGAGCTCAGCTTGCCTCTCTGAATGGCAAGCTCAAAGATG[C/G]AGAGAAACCTGTATTATTTTTTGAACGATCTGTGTATAGTGACAGGTATG
1321	AM_13645	DCK_c.364C>T(P122S)	rs67437265	snp	N	4	71888240	A // B	T // C	N/A	+	+	DCK	PA137	NM_000788.2|NP_000779.1|C|P|122|coding-nonsynonymous|T|S|122	CATTTATACATACCTGTCACTATACACAGATCGTTCAAAAAATAATACAG[A/G]TTTCTCTGCATCTTTGAGCTTGCCATTCAGAGAGGCAAGCTGAGCTCTTA
1322	AM_13646	DCK_c.*165C>T(3'UTR)	rs4643786	snp	N	4	71895260	A // B	T // C	N/A	+	+	DCK	PA137	NM_000788.2|||||mrna-utr|||	CTTTGTCTTTAAATGTCTTTTTTAAAAAAAAAACAAAAGAAAAGAAACTG[A/G]TCAAAAAGTTTTGCATAAGATTCATTTTAAAAATCTTTTTTCCTTAAAAC
1323	AM_13647	ALB_c.-400G>A	rs3756067	snp	N	4	74269645	A // B	A // G	N/A	+	+	ALB	PA24690	NM_000477.5|NP_000468.1||||locus-region|||	ATTTGGGACTTAACTCTTTCAGTATGTCTTATTTCTAAGCAAAGTATTTA[A/G]TTTGGTTAGTAATTACTAAACACTGAGAACTAAATTGCAAACACCAAGAA
1324	AM_13664	ALB_c.1033G>A(E345K)	rs72552711	snp	N	4	74279326	A // B	G // A	N/A	+	+	ALB	PA24690	NM_000477.5|NP_000468.1|G|E|345|coding-nonsynonymous|A|K|345	AAAGAATAATTTCTTATCTACTTACATGCCCAGGAAGACATCCTTTGCCT[C/T]AGCATAGTTTTTGCAAACATCCTTACTTTCAACAAAATCAGCAGCTAATG
1325	AM_13665	ALB_c.1164A>G(A388A)	rs17854155	snp	N	4	74280857	A // B	G // A	N/A	+	+	ALB	PA24690	NM_000477.5|NP_000468.1|A|A|388|coding-synonymous|G|A|388	TTTTTTTCCAACAATAAACCTACCACTTTGGCATAGCATTCATGAGGATC[C/T]GCAGCGGCACAGCACTTCTCTAGAGTGGTTTCATATGTCTTGGCAAGTCT
1326	AM_13666	ALB_c.1217A>T(E406V)	rs11538214	snp	N	4	74281998	A // B	T // A	N/A	+	+	ALB	PA24690	NM_000477.5|NP_000468.1|A|E|406|coding-nonsynonymous|T|V|406	CAAGCTGCTCAAAAAGCTCACAATTTTGTTTGATTAAATTCTGAGGCTCT[A/T]CCACAAGAGGTTTAAATTCATCGAACTGAAACATAAAAGAATTGTGTTAA
1327	AM_13667	ALB_c.1423G>T(D475Y)	rs1140449	snp	N	4	74283381	A // B	G // T	N/A	+	+	ALB	PA24690	NM_000477.5|NP_000468.1|G|D|475|coding-nonsynonymous|T|Y|475	GCAGCAAATGTTGTAAACATCCTGAAGCAAAAAGAATGCCCTGTGCAGAA[G/T]ACTATGTGAGTCTTTAAAAAAATATAATAAATTAATAATGAAAAAATTTT
1328	AM_13668	ALB_c.1468A>G(K490E)	rs1063469	snp	N	4	74283844	A // B	A // G	N/A	+	+	ALB	PA24690	NM_000477.5|NP_000468.1|A|K|490|coding-nonsynonymous|G|E|490	CTGTTCTTTAGCTATCCGTGGTCCTGAACCAGTTATGTGTGTTGCATGAG[A/G]AAACGCCAGTAAGTGACAGAGTCACCAAATGCTGCACAGAATCCTTGGTG
1329	AM_13669	ALB_c.1482T>C(S494S)	rs11538231	snp	N	4	74283858	A // B	C // T	N/A	+	+	ALB	PA24690	NM_000477.5|NP_000468.1|T|S|494|coding-synonymous|C|S|494	TCCGTGGTCCTGAACCAGTTATGTGTGTTGCATGAGAAAACGCCAGTAAG[C/T]GACAGAGTCACCAAATGCTGCACAGAATCCTTGGTGAACAGGCGACCATG
1330	AM_13681	ABCG2_c.1000G>T(E334X)	rs3201997	snp	N	4	89034649	A // B	G // T	N/A	-	-	ABCG2	PA390	NM_004827.2|NP_004818.2|G|E|334|coding-nonsynonymous|T|X|334	AGATCATAGAGCCTTCCAAGCAGGATAAGCCACTCATAGAAAAATTAGCG[G/T]AGATTTATGTCAACTCCTCCTTCTACAAAGAGACAAAAGCTGAATTACAT
1331	AM_13682	ABCG2_c.742T>C(S248P)	rs3116448	snp	N	4	89039360	A // B	C // T	N/A	-	-	ABCG2	PA390	NM_004827.2|NP_004818.2|T|S|248|coding-nonsynonymous|C|P|248	TGTCTAAGCAGGGACGAACAATCATCTTCTCCATTCATCAGCCTCGATAT[C/T]CCATCTTCAAGTTGTTTGATAGCCTCACCTTATTGGCCTCAGGAAGACTT
1332	AM_13683	ABCG2_c.623T>C(F208S)	rs1061018	snp	N	4	89042853	A // B	C // T	N/A	-	-	ABCG2	PA390	NM_004827.2|NP_004818.2|T|F|208|coding-nonsynonymous|C|S|208	AAAAAGGACTAGTATAGGAATGGAGCTTATCACTGATCCTTCCATCTTGT[C/T]CTTGGATGAGCCTACAACTGGCTTAGACTCAAGCACAGCAAATGCTGTCC
1333	AM_13686	ABCG2_c.564A>G(G188G)	rs3116439	snp	N	4	89042912	A // B	A // G	N/A	-	-	ABCG2	PA390	NM_004827.2|NP_004818.2|A|G|188|coding-synonymous|G|G|188	ATAATATTTGTGATTTAGGTTGGAACTCAGTTTATCCGTGGTGTGTCTGG[A/G]GGAGAAAGAAAAAGGACTAGTATAGGAATGGAGCTTATCACTGATCCTTC
1334	AM_13687	ABCG2_c.496C>G(Q166E)	rs1061017	snp	N	4	89052248	A // B	C // G	N/A	-	-	ABCG2	PA390	NM_004827.2|NP_004818.2|C|Q|166|coding-nonsynonymous|G|E|166	CAACAACTATGACGAATCATGAAAAAAACGAACGGATTAACAGGGTCATT[C/G]AAGAGTTAGGTCTGGATAAAGTGGCAGACTCCAAGGTAATGTGGAAAAAC
1335	AM_13688	ABCG2_c.421C>A(Q141K)	rs2231142	snp	N	4	89052323	A // B	C // A	N/A	-	-	ABCG2	PA390	NM_004827.2|NP_004818.2|C|Q|141|coding-nonsynonymous|A|K|141	TTTTTCATGATTCGTCATAGTTGTTGCAAGCCGAAGAGCTGCTGAGAACT[G/T]TAAGTTTTCTCTCACCGTCAGAGTGCCCATCACAACATCATCCTTAAGGC
1336	AM_13689	ABCG2_c.376C>T(Q126X)	rs72552713	snp	N	4	89052957	A // B	T // C	N/A	-	-	ABCG2	PA390	NM_004827.2|NP_004818.2|C|Q|126|coding-nonsynonymous|T|X|126	CCATATAGAAACAGAGGAAACAGAAAATGCAAACCCACTAATACTTACTT[A/G]TACCACGTAACCTGAATTACATTTGAAATTGGCAGGTCGCGGTGCTCCAT
1337	AM_13690	ABCG2_c.369C>T(Y123Y)	rs2231139	snp	N	4	89052964	A // B	C // T	N/A	-	-	ABCG2	PA390	NM_004827.2|NP_004818.2|C|Y|123|coding-synonymous|T|Y|123	CTGATAAATGGAGCACCGCGACCTGCCAATTTCAAATGTAATTCAGGTTA[C/T]GTGGTACAAGTAAGTATTAGTGGGTTTGCATTTTCTGTTTCCTCTGTTTC
1338	AM_13706	ADH5_c.738T>A(F246L)	rs1050637	snp	N	4	99997530	A // B	A // T	N/A	-	-	ADH5	PA24574	NM_000671.3|NP_000662.3|T|F|246|coding-nonsynonymous|A|L|246	GCAAGGGCCAAAGAGTTTGGAGCCACTGAATGTATTAACCCTCAGGATTT[A/T]AGTAAACCCATCCAGGAAGTGCTCATTGAGATGACCGATGGAGGAGTGGA
1339	AM_13717	ADH5_c.-159A>G	rs1154400	snp	N	4	100010010	A // B	G // A	N/A	-	-	ADH5	PA24574	NM_000671.3|NP_000662.3||||locus-region|||	GCTTGCAATGGCTCCAACCGGAAGGGCGGTGCTCGAGCTGTGGTGCGTGC[C/T]GCTAAGTTGTGCGTTCCAGGGTGCACTCGCCGGCGAGGCTGCACGGCGCC
1340	AM_13718	ADH5_c.-422G>C	rs17216887	snp	N	4	100010273	A // B	G // C	N/A	-	-	ADH5	PA24574	NM_000671.3|NP_000662.3||||locus-region|||	AGTAAGAGACCTGCAACAGCTTTGTGCTCCACTGGCGAATGCTTCCTCCC[C/G]TAATACACATTATGTGTGCTTGGAGACACAAGGAGTAAGATACAGCCCCT
1341	AM_13719	ADH5_C>T(rs7687322)	rs7687322	snp	N	4	100014342	A // B	T // C	N/A	-	-	ADH5	PA24574	NM_000671.3||||||||	ATAAAGAACATCTACAAAAAGCCTGCAGCTAACATCATACTTAATGGTGA[A/G]AAGCTAGAAGACTTCCTGCTAAGACTAGGAACAAGAAAAAGGTGTCCCAT
1342	AM_13720	ADH5_C>T(rs2602836)	rs2602836	snp	N	4	100014805	A // B	T // C	N/A	-	-	ADH5	PA24574	NM_000671.3||||||||	AAAACTCTGATGAAAAAAAATAAATGGAGAAATGTCTCATGTACATGGAT[A/G]TTCTGAAACAACATTGTCAAAATATCATTTATTCCCATTTGCTCTATAGA
1343	AM_13727	ADH4_c.1051C>T(L351L)	rs1126672	snp	N	4	100047812	A // B	T // C	N/A	-	-	ADH4	PA24573	NM_000670.3|NP_000661.2|C|L|351|coding-synonymous|T|L|351	TAGGTCAAATGCCTCACTGATTTTGTCAAAAGGCAGGGTATGGGTCACCA[A/G]TGCATCCAGATTGAATTTCTTATTCTTATAGTCAGTGACCAGCTTTGGGA
1344	AM_13729	ADH4_c.925G>A(V309I)	rs1126671	snp	N	4	100048414	A // B	A // G	N/A	-	-	ADH4	PA24573	NM_000670.3|NP_000661.2|G|V|309|coding-nonsynonymous|A|I|309	GGGGATCATGTACTTTCATTGGAGTAGCTGCTGGTAGCAAAGGATTGACT[A/G]TTTTTCCAGAGGAGCTAATAATCGGCCGTACTATAAATGGAACATTCTTT
1345	AM_13730	ADH4_c.765T>G(P255P)	rs1126670	snp	N	4	100052733	A // B	G // T	N/A	-	-	ADH4	PA24573	NM_000670.3|NP_000661.2|T|P|255|coding-synonymous|G|P|255	AAAGCCCTGGGAGCCACTGACTGCCTCAATCCTAGAGACTTACATAAACC[G/T]ATCCAGGAAGTTATCATTGAATTGACCAAGGGAGGTGTGGATTTTGCCCT
1346	AM_13737	ADH4_c.135C>T(S45S)	rs2032349	snp	N	4	100062819	A // B	C // T	N/A	-	-	ADH4	PA24573	NM_000670.3|NP_000661.2|C|S|45|coding-synonymous|T|S|45	GCAGAAACACAATTAAAGTCTGTGATTGCCTTGTAGATCATTGCTACCTC[C/T]CTGTGCCATACTGATGCCACTGTTATCGATTCTAAATTTGAGGGCCTAGC
1347	AM_13740	ADH4_c.-480G>A	rs28987087	snp	N	4	100065853	A // B	A // G	N/A	-	-	ADH4	PA24573	NM_000670.3|NP_000661.2||||locus-region|||	AGAAAAAAGACATGAAACAATACATACACTATGATTCCATTCATAAAAAG[A/G]CTTTGCTAGATTAAACTATTGGATAGAGAAGCTTAAATAGGTAGTAAACC
1348	AM_13741	ADH4_c.-711A>G	rs3762894	snp	N	4	100066084	A // B	G // A	N/A	-	-	ADH4	PA24573	NM_000670.3|||||mrna-utr|||	TCTTTGCTTATGATGAATTAGTGGTTACATACAAATTCTTTTCATGTACT[C/T]GGTTGCACATATGCTTGAGTTGCCTTAAAGAAAATTCAGAGCTGATATTC
1349	AM_13747	ADH6_c.885G>A(V295V)	rs4147546	snp	N	4	100128682	A // B	A // G	N/A	-	-	ADH6	PA24576	NM_000672.3|NP_000663.1|G|V|295|coding-synonymous|A|V|295	GCCCTCGCCTCCTGCAATGAGAGCTATGGGGTCTGTGTGGTTGTTGGGGT[A/G]TTGCCTGCCAGTGTTCAACTCAAAATCAGTGGCCAGTTGTTCTTCTCAGG
1350	AM_13755	ADH6_c.45C>T(L15L)	rs6843298	snp	N	4	100137393	A // B	T // C	N/A	-	-	ADH6	PA24576	NM_000672.3|NP_000663.1|C|L|15|coding-synonymous|T|L|15	GGTGGGGCCACTTCTACCTCTTCAATAGAAAATGGTGCACCAGGCTTCCA[A/G]AGTATGGCTGCTTTGCATCTGATGACCTGGGAAATAGAATACAGGGGCAG
1351	AM_13758	ADH6_c.4A>T(S2C)	rs4699735	snp	N	4	100140306	A // B	T // A	N/A	-	-	ADH6	PA24576	NM_000672.3|NP_000663.1|A|S|2|coding-nonsynonymous|T|C|2	GATATGACACAACATAAAGAATAAGACTGCACCTACTTGGCCTGTAGTAC[A/T]CATGCTGATTTTCTCCACCGCAGATGAATTTATTGAGAAAGGGAGATCCT
1352	AM_13759	ADH6_c.-930T>C	rs10002894	snp	N	4	100141240	A // B	C // T	N/A	-	-	ADH6	PA24576	NM_000672.3|||||mrna-utr|||	AAAACCAAAGATGGTGCCAAAAAAAGAAGAAAACTAACATTAATAACTCT[C/T]ATGAATATAGACACAAAAATCTTTAACAGAATGTTAGCAAAGTGAATCCA
1353	AM_13760	ADH6_c.-1992G>T	rs10008281	snp	N	4	100142302	A // B	T // G	N/A	-	-	ADH6	PA24576	NM_000672.3|||||mrna-utr|||	ATTTGTGTCTTCTTTTTTTCTTAGTTTATTAATTTTGTTGAACTTTTCAG[A/C]GCTCTTGTTTCTTCCATTTTTCTCTTCTGTTTCATTAATTTCTGTTCTTA
1354	AM_13761	ADH6_c.-2874T>C	rs6830685	snp	N	4	100143184	A // B	T // C	N/A	-	-	ADH6	PA24576	NM_000672.3||||||||	AATGAAAGAGACAGTCAAGTGATGTCAGAGCTTACATCAGCTCATATCCT[A/G]TAAATGCTAAGTTCAAGAGGTTCCTCTAACAAATGGCTTCTGTTTGTGGG
1355	AM_13763	ADH1A_c.*2804C>T	rs6811453	snp	N	4	100194977	A // B	T // C	N/A	-	-	ADH1A	PA24570	NM_000667.2||||||||	GTGTGCTGAGGGAGCCATGCTGAGATTGTTCCCAGGTTGACGGTCAGCAA[A/G]AAACCAGAAGCCTCAGTCCCACAGCTACTGGGAACTGAATTCTGGCAACA
1356	AM_13764	ADH1A_c.*1966C>A	rs12512110	snp	N	4	100195815	A // B	C // A	N/A	-	-	ADH1A	PA24570	NM_000667.2|NP_000658.1||||locus-region|||	AATTGGCATCACATATCTTTGTTCCACAAAGATGACTAAGCATTGGTCCT[G/T]CAACAATTGTACCTCCCATTTTTAGCTCCAGACTGTATAAACAACTGCAT
1357	AM_13765	ADH1A_c.*422T>G	rs7684674	snp	N	4	100197359	A // B	T // G	N/A	-	-	ADH1A	PA24570	NM_000667.2|NP_000658.1||||locus-region|||	TATATTTTATTAAAAAAAAAAAAAGGCGAAAATGCCGACAGTGAAAATTG[A/C]GATAGATGCAGGAGACTACAAGCACAATAGCCCAGCATGTGTATATTCAG
1358	AM_13766	ADH1A_c.*143G>C	rs28364341	snp	N	4	100197638	A // B	C // G	N/A	-	-	ADH1A	PA24570	NM_000667.2|||||mrna-utr|||	CATCACAGATTTTATCAATAAATTACATTTGGGGGCTTTCCAAAGAAATG[C/G]AAATTGATGTAAAATTATTTTTCAAGCAAATGTTTAAAATCCAAATGAGA
1359	AM_13768	ADH1A_c.568-811C>T	rs3805324	snp	N	4	100204574	A // B	T // C	N/A	-	-	ADH1A	PA24570	NM_000667.2|NP_000658.1||||intron|||	CCAGGGGATATTTATTAAACCTAGTCTCCCATAGTCCGCCTTCATTTTGC[A/G]TAACATGCTCTTCCTGTTCCAAATAATCTCATTCTTATATTCCCTTAAGG
1360	AM_13769	ADH1A_c.333C>T(Y111Y)	rs6828526	snp	N	4	100205887	A // B	T // C	N/A	-	-	ADH1A	PA24570	NM_000667.2|NP_000658.1|C|Y|111|coding-synonymous|T|Y|111	CTCAATGTCTGCGCAGGGAGAGCATCAGAAACCTACTCGTTTTTCAAGCA[A/G]TAGTTGCTCTCCGGGTTTTTACAAATTCTGCATTTTCCACACTGAGGAAT
1361	AM_13775	ADH1A_c.-5671G>A	rs1826909	snp	N	4	100217743	A // B	G // A	N/A	-	-	ADH1A	PA24570	NM_000667.2||||||||	TGAAAAATAATATTGATAGACCATTGACAAGATTAACCATGAAAAGAAGA[C/T]GGACGATCCAAATAAGCTCAATTAGAAATGAAATGGGAAGAATTACAACC
1362	AM_13790	ADH1B_c.497C>A(P166H)	rs1126441	snp	N	4	100237125	A // B	A // C	N/A	-	-	ADH1B	PA24571	NM_000668.4|NP_000659.2|C|P|166|coding-nonsynonymous|A|H|166	GTACACGGTGGTGGATGAGAATGCAGTGGCCAAAATTGATGCAGCCTCGC[A/C]CCTGGAGAAAGTCTGCCTCATTGGCTGTGGATTCTCGACTGGTTATGGGT
1363	AM_13798	ADH1B_c.178A>T(T60S)	rs6413413	snp	N	4	100239284	A // B	A // T	N/A	-	-	ADH1B	PA24571	NM_000668.4|NP_000659.2|A|T|60|coding-nonsynonymous|T|S|60	CTGTAGGAATCTGTCACACAGATGACCACGTGGTTAGTGGCAACCTGGTG[A/T]CCCCCCTTCCTGTGATTTTAGGCCATGAGGCAGCCGGCATCGTGGAGAGT
1364	AM_13799	ADH1B_c.171C>A(N57K)	rs1041969	snp	N	4	100239291	A // B	A // C	N/A	-	-	ADH1B	PA24571	NM_000668.4|NP_000659.2|C|N|57|coding-nonsynonymous|A|K|57	ATGGTGGCTGTAGGAATCTGTCACACAGATGACCACGTGGTTAGTGGCAA[A/C]CTGGTGACCCCCCTTCCTGTGATTTTAGGCCATGAGGCAGCCGGCATCGT
1365	AM_13800	ADH1B_c.143G>A(R48H)	rs1229984	snp	N	4	100239319	A // B	A // G	N/A	-	-	ADH1B	PA24571	NM_000668.4|NP_000659.2|G|R|48|coding-nonsynonymous|A|H|48	ATCTGAACAGCTTCTCTTTATTCTGTAGATGGTGGCTGTAGGAATCTGTC[A/G]CACAGATGACCACGTGGTTAGTGGCAACCTGGTGACCCCCCTTCCTGTGA
1366	AM_13801	ADH1B_c.60A>G(K20K)	rs1229983	snp	N	4	100240002	A // B	A // G	N/A	-	-	ADH1B	PA24571	NM_000668.4|NP_000659.2|A|K|20|coding-synonymous|G|K|20	ATTTTCTAGGTAATCAAATGCAAAGCAGCTGTGCTATGGGAGGTAAAGAA[A/G]CCCTTTTCCATTGAGGATGTGGAGGTTGCACCTCCTAAGGCTTATGAAGT
1367	AM_13802	ADH1B_c.49_50insG(G17X)	rs72552716	in-del	N	4	100240012	A // B	G // GG	N/A	-	-	ADH1B	PA24571	NM_000668.4|NP_000659.2|-|-|17|coding-nonsynonymous|G|G|17	CTTAGGAGGTGCAACCTCCACATCCTCAATGGAAAAGGGTTTCTTTACCT[C/CC]CCATAGCACAGCTGCTTTGCATTTGATTACCTAGAAAATCAAACAGAGAG
1368	AM_13810	ADH1C_c.1054C>A(P352T)	rs35719513	snp	N	4	100260783	A // B	A // C	N/A	-	-	ADH1C	PA24572	NM_000669.3|NP_000660.1|C|P|352|coding-nonsynonymous|A|T|352	ACTTTATGGCTAAGAAGTTTTCACTGGATGCATTAATAACAAATATTTTA[A/C]CTTTTGAAAAAATAAATGAAGGATTTGACCTGCTTCGCTCTGGAAAGAGG
1369	AM_13817	ADH1C_c.312T>C(C104C)	rs1789915	snp	N	4	100266371	A // B	T // C	N/A	-	-	ADH1C	PA24572	NM_000669.3|NP_000660.1|T|C|104|coding-synonymous|C|C|104	GCATCAGAAACTTACTCATTTTTCAAGCAGTAGTTGCTTTCTGGGTTTTT[A/G]CAAATTCTGCATTTTCCACACTGAGGAGTAAAGAGCGGGATGACTTTATC
1370	AM_13818	ADH1C_c.232G>T(G78X)	rs283413	snp	N	4	100268190	A // B	G // T	N/A	-	-	ADH1C	PA24572	NM_000669.3|NP_000660.1|G|G|78|coding-nonsynonymous|T|X|78	CCCTTCCTGTGATTTTAGGCCATGAGGCAGCCGGCATCGTGGAAAGTGTT[G/T]GAGAAGGGGTGACTACAGTCAAACCAGGTACAGGATTCACACTCAGGGAA
1371	AM_13819	ADH1C_c.143G>A(R48H)	rs35385902	snp	N	4	100268279	A // B	A // G	N/A	-	-	ADH1C	PA24572	NM_000669.3|NP_000660.1|G|R|48|coding-nonsynonymous|A|H|48	ATCTAAACATCTTCTCTTTATTCTGTAGATGGTGGCTGCAGGAATCTGTC[A/G]TTCAGATGAGCATGTGGTTAGTGGCAACCTGGTGACCCCCCTTCCTGTGA
1372	AM_13822	ADH1C_c.-32G>A	rs72552717	snp	N	4	100273864	A // B	A // G	N/A	-	-	ADH1C	PA24572	NM_000669.3|||||mrna-utr|||	ATACCTGCTTTATGCACTCAAGCAGAGAAGAAATCCACAAGTACTCACCA[A/G]CCTCCTGGTCTGCAGAGAAGACAGAATCAATATGAGCACAGCAGGAAAAG
1373	AM_13841	ADH7_c.690G>A(R230R)	rs971074	snp	N	4	100341861	A // B	A // G	N/A	-	-	ADH7	PA24577	NM_000673.4|NP_000664.2|G|R|230|coding-synonymous|A|R|230	GGAGTTGGCCTGTCAGTCATCATGGGCTGTAAGTCAGCTGGTGCATCTAG[A/G]ATCATTGGGATTGACCTCAACAAAGACAAATTTGAGAAGGCCATGGCTGT
1374	AM_13844	ADH7_c.447C>A(V149V)	rs1042111	snp	N	4	100349083	A // B	C // A	N/A	-	-	ADH7	PA24577	NM_000673.4|NP_000664.2|C|V|149|coding-synonymous|A|V|149	TCATCCACCACTGTGTACTCGGTAAATGTACTGGTGTTCATGAAGTGGTG[G/T]ACTGGTTTGCCCTTGCATGTAAATCTGGTGGTGCCATCAGCCAGTACTCC
1375	AM_13846	ADH7_c.395G>A(R132H)	rs284797	snp	N	4	100349135	A // B	A // G	N/A	-	-	ADH7	PA24577	NM_000673.4|NP_000664.2|G|R|132|coding-nonsynonymous|A|H|132	ATTGAATTAATTAATACGTGTATTTGATGTATCAAACAGTATTACTGGTC[A/G]TGGAGTACTGGCTGATGGCACCACCAGATTTACATGCAAGGGCAAACCAG
1376	AM_13848	ADH7_c.275G>C(G92A)	rs1573496	snp	N	4	100349669	A // B	C // G	N/A	-	-	ADH7	PA24577	NM_000673.4|NP_000664.2|G|G|92|coding-nonsynonymous|C|A|92	AGTGATTGTGGGACATGAGGCAACTGGGATTGTAGAGAGCATTGGAGAAG[C/G]AGTGACTACAGTGAAACCAGGTATATGCAGGTGTCAAACCACAAGTTTGA
1377	AM_13854	ADH7_-5360G>A(rs1442477)	rs1442477	snp	N	4	100361787	A // B	G // A	N/A	-	-	ADH7	PA24577	NM_000673.4||||||||	CGGATAGATGTCAGCCCTGGGAATGAGTGAGGGTTAATATTTGAGTAATC[C/T]GACTACCTGCCAGACACTAATATATAATCAATTTTTGTGGGTTATTTTAT
1378	AM_13859	UGT8_c.573G>T(L191L)	rs61733374	snp	N	4	115544609	A // B	G // T	N/A	+	+	UGT8	PA37195	NM_003360.3|NP_003351.2|G|L|191|coding-synonymous|T|L|191	GCATACGTCCCAGAGTTTAACTCACTCCTCACAGACCGCATGAACTTGCT[G/T]CAAAGGATGAAAAATACCGGTGTTTACCTCATTTCCAGATTAGGGGTCAG
1379	AM_13860	UGT8_c.677C>T(P226L)	rs4148254	snp	N	4	115544713	A // B	C // T	N/A	+	+	UGT8	PA37195	NM_003360.3|NP_003351.2|C|P|226|coding-nonsynonymous|T|L|226	TCTGGTTCTTCCCAAATATGAAAGGATAATGCAGAAGTACAACCTGCTGC[C/T]AGAGAAGTCCATGTATGATTTGGTTCATGGGTCCAGCCTGTGGATGCTGT
1380	AM_13861	UGT8_c.678G>A(P226P)	rs6851610	snp	N	4	115544714	A // B	G // A	N/A	+	+	UGT8	PA37195	NM_003360.3|NP_003351.2|G|P|226|coding-synonymous|A|P|226	CACAGCATCCACAGGCTGGACCCATGAACCAAATCATACATGGACTTCTC[C/T]GGCAGCAGGTTGTACTTCTGCATTATCCTTTCATATTTGGGAAGAACCAG
1381	AM_13862	UGT8_c.741A>G(A247A)	rs4148255	snp	N	4	115544777	A // B	A // G	N/A	+	+	UGT8	PA37195	NM_003360.3|NP_003351.2|A|A|247|coding-synonymous|G|A|247	TATGATTTGGTTCATGGGTCCAGCCTGTGGATGCTGTGTACTGACGTAGC[A/G]CTGGAATTCCCAAGACCCACTCTGCCTAATGTTGTTTATGTAGGAGGAAT
1382	AM_13863	UGT8_c.1104G>A(M368I)	rs11098261	snp	N	4	115589302	A // B	A // G	N/A	N/A	N/A	UGT8	PA37195	NM_003360.3|NP_003351.2|G|M|368|coding-nonsynonymous|A|I|368	ATTAAAGCCTTCCTGAGCCATGGTGGTTTGAACAGTATTTTTGAAACTAT[A/G]TATCATGGTGTGCCTGTAGTGGGAATTCCACTCTTTGGAGACCATTATGA
1383	AM_13864	HMGCR_c.-68T>C	rs17244722	snp	N	5	74633081	A // B	C // T	N/A	+	+	HMGCR	PA189	NM_000859.2|||||mrna-utr|||	GTAAGGTGAGGGCTCCTTCCGCTCCGCGACTGCGTTAACTGGAGCCAGGC[C/T]GAGCGTCGGCGCCGGGGTTCGGTGGCCTCTAGTGAGATCTGGAGGTGAGG
1384	AM_13867	HMGCR_c.-24+591G>A	rs17238351	snp	N	5	74633716	A // B	A // G	N/A	+	+	HMGCR	PA189	NM_000859.2|||||mrna-utr|||	CATTCACGCCCAGGAACTGCTGTTCGTTAGCACCTTTCTTTTAGGTGACG[A/G]GAAAGATCTCTGTAAATACTGCTGACTAACTTAGAACCATGAAAGAACCG
1385	AM_13869	HMGCR_c.166-419G>T	rs3843482	snp	N	5	74639259	A // B	T // G	N/A	+	+	HMGCR	PA189	NM_000859.2|NP_000850.1||||intron|||	CACCCAGCTAATTTTTTAATTTTTTTTGAGATGGAATCTCGCTCTGTCAC[A/C]CAGGCTGGAGTGCAGTGGCGCGATCTCGGCTCGCTGCAAGCTCTGCCTCC
1386	AM_13870	HMGCR_c.1912A>G(I638V)	rs5908	snp	N	5	74652199	A // B	A // G	N/A	+	+	HMGCR	PA189	NM_000859.2|NP_000850.1|A|I|638|coding-nonsynonymous|G|V|638	TTGCATCTTTTATTTATAGATTTGCACGTCTACAGAAACTTCATACAAGT[A/G]TAGCTGGACGCAACCTTTATATCCGTTTCCAGTCCAGGTCAGGGGATGCC
1387	AM_13871	HMGCR_c.*8G>A	rs5909	snp	N	5	74656175	A // B	G // A	N/A	+	+	HMGCR	PA189	NM_000859.2|||||mrna-utr|||	TTTATGTTAGTCCTTTAGAACCCAATGCCCATGTTCCAGTTCAGAACTGT[C/T]GGGCTATTCAGGCTGTCTTCTTGGTGCAAGCTCCTTGGAGGTCTTGTAAA
1388	AM_13872	HMGCR_c.*107G>A	rs1044453	snp	N	5	74656274	A // B	A // G	N/A	+	+	HMGCR	PA189	NM_000859.2|||||mrna-utr|||	AAATCTGTGAATTAAAAAAGCTCAATGCATTGTCTTGTGGAGGATGAATA[A/G]ATGTGATCACTGAGACAGCCACTTGGTTTTTGGCTCTTTCAGAGAGGTCT
1389	AM_13890	SLC22A4_c.555C>T(F185F)	rs460415	snp	N	5	131649364	A // B	C // T	N/A	+	+	SLC22A4	PA332	NM_003059.2|NP_003050.2|C|F|185|coding-synonymous|T|F|185	AGGAAGAACGTTCTCTTCGCAACCATGGCTGTACAGACTGGCTTCAGCTT[C/T]CTGCAGATTTTCTCCATCAGCTGGGAGATGTTCACTGTGTTATTTGTCAT
1390	AM_13894	SLC22A4_c.917C>T(T306I)	rs272893	snp	N	5	131663062	A // B	T // C	N/A	+	+	SLC22A4	PA332	NM_003059.2|NP_003050.2|C|T|306|coding-nonsynonymous|T|I|306	ATCTGCAAATGCTTACCTCCACAGAATCAAATATCACTGCTGGTACAGCT[A/G]TGTTGTTCATTTTTGCAGCTTTTTGGATGATATCTTCAGCCTCTCTAAAT
1391	AM_13895	SLC22A4_c.965T>CorCT(L322PorX)	rs72552719	in-del	N	5	131667462	A // B // C	C // CT // T	N/A	+	+	SLC22A4	PA332	NM_003059.2|NP_003050.2|T|L|322|coding-nonsynonymous|C|P|322	CTTAATCTCATGGTTATTTGCATTATTTTGGTTACAGGAGCTAAATCCCC[C/CT/T]GAAGCAGCAGAAAGCTTTCATTCTGGACCTGTTCAGGACTCGGAATATTG
1392	AM_13896	SLC22A4_c.1182C>G(T394T)	rs272879	snp	N	5	131670546	A // B	G // C	N/A	+	+	SLC22A4	PA332	NM_003059.2|NP_003050.2|C|T|394|coding-synonymous|G|T|394	ACACCTCCTCCCCAGAACAGTACTGCAGCTATGATATAACGCCTGGGCAG[C/G]GTTCGCAATAGCAGCCAGGCTGTAATGTAAGCTGGAATTTCAATCAAGGC
1393	AM_13900	SLC22A4_c.1385G>A(G462E)	rs4646201	snp	N	5	131671634	A // B	A // G	N/A	+	+	SLC22A4	PA332	NM_003059.2|NP_003050.2|G|G|462|coding-nonsynonymous|A|E|462	TGTCTTCACTGCTGAGCTCTACCCAACCCTGGTCAGGAACATGGCGGTGG[A/G]GGTCACATCCACGGCCTCCAGAGTGGGCAGCATCATTGCCCCCTACTTTG
1394	AM_13903	SLC22A4_c.1507C>T(L503F)	rs1050152	snp	N	5	131676320	A // B	C // T	N/A	+	+	SLC22A4	PA332	NM_003059.2|NP_003050.2|C|L|503|coding-nonsynonymous|T|F|503	GAATGCTGCCCTACATCGTCATGGGTAGTCTGACTGTCCTGATTGGAATC[C/T]TCACCCTTTTTTTCCCTGAAAGTTTGGGAATGACTCTTCCAGAAACCTTA
1395	AM_13904	SLC22A4_c.1520delT(F507X)	rs72552721	in-del	N	5	131676333	A // B	- // T	N/A	+	+	SLC22A4	PA332	NM_003059.2|NP_003050.2|T|F|507|coding-nonsynonymous|-|X|507	CATCGTCATGGGTAGTCTGACTGTCCTGATTGGAATCCTCACCCTTTTTT[-/T]CCCTGAAAGTTTGGGAATGACTCTTCCAGAAACCTTAGAGCAGATGCAGA
1396	AM_13921	SLC22A5_c.12C>G(Y4X)	rs72552722	snp	N	5	131705676	A // B	G // C	N/A	+	+	SLC22A5	PA333	NM_003060.3|NP_003051.1|C|Y|4|coding-nonsynonymous|G|X|4	ATGAGGCGCTGGAAGGGCCCCCACTCGCCCAGGAAGGCGGTCACCTCGTC[C/G]TAGTCCCGCATGCCGCCCTCAGAGGCCCACAGAGCGCGGCCTGGGGTCGG
1397	AM_13929	SLC22A5_c.396G>A(W132X)	rs72552727	snp	N	5	131714072	A // B	A // G	N/A	+	+	SLC22A5	PA333	NM_003060.3|NP_003051.1|G|W|132|coding-nonsynonymous|A|X|132	ACCTTTTAAAAAGAAGTGAATGATACACCCCCTTTGCTCATCTTGCAGTG[A/G]AACCTGGTGTGTGAGGACGACTGGAAGGCCCCACTCACAATCTCCTTGTT
1398	AM_13931	SLC22A5_c.565T>C(F189L)	rs2405518	snp	N	5	131719906	A // B	C // T	N/A	+	+	SLC22A5	PA333	NM_003060.3|NP_003051.1|T|F|189|coding-nonsynonymous|C|L|189	TGCTGTTCGTGACCATGGGCATGCAGACAGGCTTCAGCTTCCTGCAGATC[C/T]TCTCGAAGAATTTTGAGATGTTTGTCGTGCTGTTTGTCCTTGTAGGCATG
1399	AM_13934	SLC22A5_c.807A>G(L269L)	rs274558	snp	N	5	131721174	A // B	G // A	N/A	+	+	SLC22A5	PA333	NM_003060.3|NP_003051.1|A|L|269|coding-synonymous|G|L|269	CAGTGGGCACATGGGGCACAAGGTCACACTCACCACCAGAGTGCCACGCA[C/T]AGCACCCCCGGCATCGTCAGCGCCACCAGCAGCATCCGCCAGTCTCGGAT
1400	AM_13941	SLC22A5_c.978G>A(Q326Q)	rs1045019	snp	N	5	131724639	A // B	A // G	N/A	+	+	SLC22A5	PA333	NM_003060.3|NP_003051.1|G|Q|326|coding-synonymous|A|Q|326	ACACTTATGATGTTGTTCCTGCAGTTACAAGACCTAAGTTCCAAGAAGCA[A/G]CAGTCCCACAACATTCTGGATCTGCTTCGAACCTGGAATATCCGGATGGT
1401	AM_13944	SLC22A5_c.1161T>G(Y387X)	rs72552731	snp	N	5	131726490	A // B	T // G	N/A	+	+	SLC22A5	PA333	NM_003060.3|NP_003051.1|T|Y|387|coding-nonsynonymous|G|X|387	GCCATGGAATAGCGCCGGGGCAAATATTGCAGCAGCAGCCAGGCCAACAC[A/C]TATGCTGGGACTTCAACCATCGCTGAAAGGAAGCAGTTCACAAAGATGTC
1402	AM_13958	SLC22A5_c.*47C>T	rs1045020	snp	N	5	131730011	A // B	C // T	N/A	+	+	SLC22A5	PA333	NM_003060.3|||||mrna-utr|||	CTAACATCGCTTCCAGTAAGGGAGAAACTGAAGAGGAAAGACTGTCTTGC[C/T]AGAAATGGCCAGCTTGTGCAGACTCCGAGTCCTTCAGTGACAAAAGGCCT
1403	AM_13959	SLC22A5_c.*842C>T	rs274548	snp	N	5	131730807	A // B	T // C	N/A	+	+	SLC22A5	PA333	NM_003060.3|||||mrna-utr|||	TGAAGGGCAAATAACAAGGAGAAAAGGATACAACAACAAACAAATAAACA[A/G]TAAAACAAAACCCACATTACAGCTTTGAGAGAAAAGACAACGTTGCTCAT
1404	AM_13960	NR3C1_c.*2188A>G	rs6193	snp	N	5	142659266	A // B	A // G	N/A	-	-	NR3C1	PA181	NM_001018074.1|||||mrna-utr|||	TAAATAGTGCAGAATCTCATAGGTTGCCAATAATACACTAATTCCTTTCT[A/G]TCCTACAACAAGAGTTTATTTCCAAATAAAATGAGGACATGTTTTTGTTT
1405	AM_13961	NR3C1_c.*1706G>T	rs6187	snp	N	5	142659748	A // B	G // T	N/A	-	-	NR3C1	PA181	NM_001018074.1|||||mrna-utr|||	ATTTTTAGATGAGATTGTTTTATCATGACATGTTATATATTTTTTGTAGG[G/T]GTCAAAGAAATGCTGATGGATAACCTATATGATTTATAGTTTGTACATGC
1406	AM_13962	NR3C1_c.*1225T>C	rs6197	snp	N	5	142660229	A // B	T // C	N/A	-	-	NR3C1	PA181	NM_001018074.1|||||mrna-utr|||	GTGTAGTTTTACAAACATGGATGTCTGACATACAGTTCTAAATCACAAAA[A/G]TCAGTAGCTGAGCTTTCCTGTACCATCAGGAAAGATTAACCAATTGGTGA
1407	AM_13963	NR3C1_c.2298T>C(N766N)	rs6196	snp	N	5	142661490	A // B	T // C	N/A	-	-	NR3C1	PA181	NM_001018074.1|NP_001018084.1|T|N|766|coding-synonymous|C|N|766	TCTTATTAAGGCAGTCACTTTTGATGAAACAGAAGTTTTTTGATATTTCC[A/G]TTTGAATATTTTGGTATCTGATTGGTGATGATTTCAGCTAACATCTCGGG
1408	AM_13964	NR3C1_c.2034C>T(D678D)	rs258751	snp	N	5	142662280	A // B	C // T	N/A	-	-	NR3C1	PA181	NM_001018074.1|NP_001018084.1|C|D|678|coding-synonymous|T|D|678	AAAAGAAAATCCTTTAACTGACTTCATCTTAACCTTTTAGTTCCTAAGGA[C/T]GGTCTGAAGAGCCAAGAGCTATTTGATGAAATTAGAATGACCTACATCAA
1409	AM_13965	NR3C1_c.1764C>T(H588H)	rs6194	snp	N	5	142678361	A // B	T // C	N/A	-	-	NR3C1	PA181	NM_001018074.1|NP_001018084.1|C|H|588|coding-synonymous|T|H|588	GCCATAAGAAACATCCAGGAGTACTGCAGTAGGGTCATTTGGTCATCCAG[A/G]TGTAAGTTCCTGAAACCTGAATTAAGAGAAATAAAGGTATGAGGCAACAC
1410	AM_13966	NR3C1_c.1551C>G(N517K)	rs33391	snp	N	5	142680246	A // B	G // C	N/A	-	-	NR3C1	PA181	NM_001018074.1|NP_001018084.1|C|N|517|coding-nonsynonymous|G|K|517	GACACCAGGGTAGGGGTGAGTTGTGGTAACGTTGCAGGAACTATTGTTTT[C/G]TTACCAGGATTTTCAGAGGTTTCTTGTGAGACTCCTGTAGTGGCCTGCTG
1411	AM_13967	NR3C1_c.1088A>G(N363S)	rs56149945	snp	N	5	142779317	A // B	A // G	N/A	-	-	NR3C1	PA181	NM_001018074.1|NP_001018084.1|A|N|363|coding-nonsynonymous|G|S|363	TCAGAAGCCTATTTTTAATGTCATTCCACCAATTCCCGTTGGTTCCGAAA[A/G]TTGGAATAGGTGCCAAGGATCTGGAGATGACAACTTGACTTCTCTGGGGA
1412	AM_13968	NR3C1_c.804C>T(P268P)	rs6199	snp	N	5	142779601	A // B	C // T	N/A	-	-	NR3C1	PA181	NM_001018074.1|NP_001018084.1|C|P|268|coding-synonymous|T|P|268	GACACTAAACCCAAAATTAAGGATAATGGAGATCTGGTTTTGTCAAGCCC[C/T]AGTAATGTAACACTGCCCCAAGTGAAAACAGAAAAAGAAGATTTCATCGA
1413	AM_13969	NR3C1_c.193T>G(F65V)	rs6192	snp	N	5	142780212	A // B	G // T	N/A	-	-	NR3C1	PA181	NM_001018074.1|NP_001018084.1|T|F|65|coding-nonsynonymous|G|V|65	TGGCTGTCGCTTCTCAATCAGACTCCAAGCAGCGAAGACTTTTGGTTGAT[G/T]TTCCAAAAGGCTCAGTAAGCAATGCGCAGCAGCCAGATCTGTCCAAAGCA
1414	AM_13970	NR3C1_c.68G>A(R23K)	rs6190	snp	N	5	142780337	A // B	A // G	N/A	-	-	NR3C1	PA181	NM_001018074.1|NP_001018084.1|G|R|23|coding-nonsynonymous|A|K|23	ATTAACTCCTGGTAGAGAAGAAAACCCCAGCAGTGTGCTTGCTCAGGAGA[A/G]GGGAGATGTGATGGACTTCTATAAAACCCTAAGAGGAGGAGCTACTGTGA
1415	AM_13971	NR3C1_c.66G>A(E22E)	rs6189	snp	N	5	142780339	A // B	A // G	N/A	-	-	NR3C1	PA181	NM_001018074.1|NP_001018084.1|G|E|22|coding-synonymous|A|E|22	TCATTAACTCCTGGTAGAGAAGAAAACCCCAGCAGTGTGCTTGCTCAGGA[A/G]AGGGGAGATGTGATGGACTTCTATAAAACCCTAAGAGGAGGAGCTACTGT
1416	AM_13973	TPMT*3C_c.719A>G(Y240C)	rs1142345	snp	Y	6	18130918	A // B	A // G	N/A	-	-	TPMT	PA356	NM_000367.2|NP_000358.1|A|Y|240|coding-nonsynonymous|G|C|240	TGAAGAACGACATAAAAGTTGGGGAATTGACTGTCTTTTTGAAAAGTTAT[A/G]TCTACTTACAGAAAAGTAAATGAGACATAGATAAAATAAAATCACACTGA
1417	AM_13976	TPMT*8_c.644G>A(R215H)	rs56161402	snp	Y	6	18130993	A // B	G // A	N/A	-	-	TPMT	PA356	NM_000367.2|NP_000358.1|G|R|215|coding-nonsynonymous|A|H|215	TTCCCCAACTTTTATGTCGTTCTTCAAAAGCATCAACCTTCTCAAGACAA[C/T]GTATATTGCATATTTTACCTGAAACAAGAAAGAGTAACATGTTAAAATAC
1418	AM_13977	TPMT*4_c.626-1G>A(SpliceDefect)	rs1800584	snp	Y	6	18131012	A // B	A // G	N/A	-	-	TPMT	PA356	NM_000367.2|NP_000358.1||||splice-site|||	CCTGATGTCATTCTTCATAGTATTTTAACATGTTACTCTTTCTTGTTTCA[A/G]GTAAAATATGCAATATACGTTGTCTTGAGAAGGTTGATGCTTTTGAAGAA
1419	AM_13978	TPMT*24_c.537G>T(Q179H)	rs6921269	snp	N	6	18134078	A // B	T // G	N/A	-	-	TPMT	PA356	NM_000367.2|NP_000358.1|G|Q|179|coding-nonsynonymous|T|H|179	ACTTTACCTGGATGTTTAGTTGGATCATAAGAAAGAACACACAGGAGATA[A/C]TGAAACTTCTTTCCCAGGAGGGAAAACATTGTATCTGCATAGCTACAAAG
1420	AM_13979	TPMT_c.474C>T(I158I)	rs2842934	snp	Y	6	18139214	A // B	C // T	N/A	-	-	TPMT	PA356	NM_000367.2|NP_000358.1|C|I|158|coding-synonymous|T|I|158	AATATTGGCAAATTTGACATGATTTGGGATAGAGGAGCATTAGTTGCCAT[C/T]AATCCAGGTGATCGCAAATGGTAAGTAATTTTTCTTTTTTTGTTTAGCTG
1421	AM_13980	TPMT*3B_c.460G>A(A154T)	rs1800460	snp	Y	6	18139228	A // B	A // G	N/A	-	-	TPMT	PA356	NM_000367.2|NP_000358.1|G|A|154|coding-nonsynonymous|A|T|154	TTTCTGGTAGGACAAATATTGGCAAATTTGACATGATTTGGGATAGAGGA[A/G]CATTAGTTGCCATCAATCCAGGTGATCGCAAATGGTAAGTAATTTTTCTT
1422	AM_13985	TPMT_c.292G>T(E98X)	rs72552739	snp	N	6	18143901	A // B	T // G	N/A	-	-	TPMT	PA356	NM_000367.2|NP_000358.1|G|E|98|coding-nonsynonymous|T|X|98	TTCGGTGATTGGTTCTTCTGAGTAAGAAAGATTCTGCTCTGTAAAAAATT[A/C]TTGTATCCCAAGTTCACTGATTTCCACACCAACTACACTGTGTCCCCGGT
1423	AM_13986	TPMT*2_c.238G>C(A80P)	rs1800462	snp	N	6	18143955	A // B	G // C	N/A	-	-	TPMT	PA356	NM_000367.2|NP_000358.1|G|A|80|coding-nonsynonymous|C|P|80	TATCCCAAGTTCACTGATTTCCACACCAACTACACTGTGTCCCCGGTCTG[C/G]AAACCTGCATAAAATCATACATTTACACTTAAATTATGTTTTCAAATGAC
1424	AM_14021	CYP21A2_G>C(E351D)	rs72552756	snp	N	6	32008469	A // B	G // C	N/A	+	+	CYP21A2	PA27096	NM_001128590.1|NP_001122062.1|G|E|351|coding-nonsynonymous|C|D|351	ACCGTCTCATCCAGGTGGGCGCCTTGGAGGTTCGGAATGATGACTGTGCC[C/G]TCAGGGATGTCGTAGCCGGAGATGCTGAAGGGGGCTGGAGTTAGAGGCTG
1425	AM_14022	CYP21A2_C>T(R379C)	rs72552757	snp	N	6	32008648	A // B	C // T	N/A	+	+	CYP21A2	PA27096	NM_001128590.1|NP_001122062.1|C|R|379|coding-nonsynonymous|T|C|379	CCCGCTGCCGCTGAACGCCTCCCCACCCACCTGTCCACCCGCCCGCAGAT[C/T]GCTTCCTGGAGCCAGGCAAGAACTCCAGAGCTCTGGCCTTCGGCTGCGGT
1426	AM_14023	CYP21A2_G>A(G395S)	rs72552758	snp	N	6	32008696	A // B	G // A	N/A	+	+	CYP21A2	PA27096	NM_001128590.1|NP_001122062.1|G|G|395|coding-nonsynonymous|A|S|395	CACGAAGAGCTCCAGGCGCGCCAGCGGCTCGCCCAGGCACACGCGGGCAC[C/T]GCAGCCGAAGGCCAGAGCTCTGGAGTTCTTGCCTGGCTCCAGGAAGCGAT
1427	AM_14098	PPARD_c.-186+1530G>A	rs6919734	snp	N	6	35311988	A // B	A // G	N/A	+	+	PPARD	PA33557	NM_006238.3|NP_006229.1||||intron|||	CTCTTGGAGTCTCTTCTCCCTCTTTTTTCTTTGTTCTTTTCTGAATCTAG[A/G]GAATCCAAATTGTCCCTCTTTTTCCCTGGGAGCTTAATTTCCTCTGTATC
1428	AM_14099	PPARD_c.-186+1796G>A	rs2267664	snp	N	6	35312254	A // B	A // G	N/A	+	+	PPARD	PA33557	NM_006238.3|NP_006229.1||||intron|||	CTTGAGAGCCCACCACCTTCCATGTGTGTCTGGATGTTTAACCTTACCAA[A/G]CAGAAGATTCTCGTCATATCCTTCAGTTTGAGCTCCTTTATTTGGCGTTG
1429	AM_14101	PPARD_c.-102+2374C>T	rs6457813	snp	N	6	35317301	A // B	C // T	N/A	+	+	PPARD	PA33557	NM_006238.3|NP_006229.1||||intron|||	AAATAAAAATGGCAAAAGAATCTCATGTTTTAATAAAGTTTACGTATTTG[C/T]GTTGGGATGCATTCAGAGCTCTCCTGGGCTGCATGCAGTCATGGGCCATG
1430	AM_14103	PPARD_c.-102+3857G>A	rs4713851	snp	N	6	35318784	A // B	A // G	N/A	+	+	PPARD	PA33557	NM_006238.3|NP_006229.1||||intron|||	GAATATTATAAAACAGCATTCTCAAACTTTTTGGCCTCAAGATCCCTTTA[A/G]ATTCTTTTTTTGTTTGTTTGTTTGTTTTTGTTTTTTGAGACGGAGTCTCT
1431	AM_14104	PPARD_c.-102+5520C>T	rs7771474	snp	N	6	35320447	A // B	C // T	N/A	+	+	PPARD	PA33557	NM_006238.3|NP_006229.1||||intron|||	TGGTTCTTGCTTGGGATATGTCATGTTGCTATAGTCAAATGAAGACGGGG[C/T]AGGTGTCATCTGAAGGCTCAGCTGGGCTGGGTGTCCACGCTGGCTTAGGC
1432	AM_14106	PPARD_c.-102+7836A>G	rs7744392	snp	N	6	35322763	A // B	A // G	N/A	+	+	PPARD	PA33557	NM_006238.3|NP_006229.1||||intron|||	CATGGGCTTGTGACTGAATGTCCTGAGCCTTCATTTTCTTCCCTGTGAGG[A/G]TTAAAATGAACCTCAGGAAATGCTGGCTTGTCCTCTTTCTGTCAAGCTGG
1433	AM_14107	PPARD_c.-102+8048A>G	rs7758272	snp	N	6	35322975	A // B	A // G	N/A	+	+	PPARD	PA33557	NM_006238.3|NP_006229.1||||intron|||	CTCCTGGCATTCAGGGGAGTGCGTTGCAGCACCCCATTTTTTTTTCATTG[A/G]AGTCCTGTCTTCCAGCCAGGCACAGTGAATCACTTGAGGCCACGAGTTTG
1434	AM_14108	PPARD_c.-102+9814T>C	rs7746988	snp	N	6	35324741	A // B	C // T	N/A	+	+	PPARD	PA33557	NM_006238.3|NP_006229.1||||intron|||	CTTTGGGGAGGAGTGATGGGAAATGGTTTACAATTAACAGCATATTCCAA[C/T]GAAGAAAGAAAGCATATGATGTCTGCACAACAGAGGAGAGTGTCCACAAT
1435	AM_14109	PPARD_c.-102+10791C>T	rs4278009	snp	N	6	35325718	A // B	C // T	N/A	+	+	PPARD	PA33557	NM_006238.3|NP_006229.1||||intron|||	GACGCTGCCAAGGCTCCTAATCTGACACTTCTTTCATGTGGACCAGGGAT[C/T]TGAACTGTGTTTCTTCCAAACTTTTGGAGCTTGCTTCCTTGGTGGTAAGC
1436	AM_14111	PPARD_c.-102+15103T>C	rs6901410	snp	N	6	35330030	A // B	C // T	N/A	+	+	PPARD	PA33557	NM_006238.3|NP_006229.1||||intron|||	TTTCCCATTTTTCAGGTGGTTTTGTGGTGTCTGCTTGTCCTCCGACCTCC[C/T]CTCCCATTTGTGGGAAAGGCATTTGGCCTGGAGGGAGGCACTTGGGAAGA
1437	AM_14112	PPARD_c.-102+15971T>C	rs6457815	snp	N	6	35330898	A // B	C // T	N/A	+	+	PPARD	PA33557	NM_006238.3|NP_006229.1||||intron|||	TTCCAGAAACGCATCTCAAAGCAAGGGAGAAAATTGAAGATGGGGTATTT[C/T]GTGGGGAACAAGCTATGCCTTCCTGTCACTTCTTACAGAATAAAATGGGG
1438	AM_14113	PPARD_c.-102+20363G>A	rs7757196	snp	N	6	35335290	A // B	A // G	N/A	+	+	PPARD	PA33557	NM_006238.3|NP_006229.1||||intron|||	ATTCAGGTTATCATCATTCCCTATCTGATTGATGAGGAAACTAAGGCTCA[A/G]AAAAATCCATTTGCTCAAGGAGAAACAGTGTTTCAGTTACCTACTGCTGT
1439	AM_14114	PPARD_c.-102+23031T>G	rs7754530	snp	N	6	35337958	A // B	T // G	N/A	+	+	PPARD	PA33557	NM_006238.3|NP_006229.1||||intron|||	ACCACCATCTTTCCCAACAGCCAGACCCTTCCTGGCCCACAGACAGGGTC[A/C]GGACACAGACAGCATCAATTCCCAAACTAACTGGTTGACAGGTCAGAGAA
1440	AM_14115	PPARD_c.-102+23179C>G	rs7772754	snp	N	6	35338106	A // B	C // G	N/A	+	+	PPARD	PA33557	NM_006238.3|NP_006229.1||||intron|||	TGTATCGTTTCCTGTTGCCCTTAGAAAGGCTGCATCGTGTTGTCTGGCCA[C/G]TTCCTCTATTGTGTGCAGGCATGTTGGGGAGTGAGTAGAGTTGGGTGGAT
1441	AM_14116	PPARD_c.-102+24108C>T	rs7739752	snp	N	6	35339035	A // B	T // C	N/A	+	+	PPARD	PA33557	NM_006238.3|NP_006229.1||||intron|||	AAGAGGAACCAGGGCAGCAAAGGCGCAGTCAGAGAGGAAGGGAAACAGAG[A/G]CCATGGGAGAACAGACATTTACCCTCCTAGGGGGCAGGGTCCAGTCTCTT
1442	AM_14117	PPARD_c.-102+25967C>G	rs6913026	snp	N	6	35340894	A // B	C // G	N/A	+	+	PPARD	PA33557	NM_006238.3|NP_006229.1||||intron|||	AATGCTGTGTCCTTACATGGCAGAAGGGTGAAAGTGGCCCAGCTAGTTCC[C/G]TGGAGCCCTTTTATAAGAGCACTAATCCGTTCCTGAGGGCAGAGCCTTCA
1443	AM_14118	PPARD_c.-101-28722C>T	rs7770619	snp	N	6	35350042	A // B	C // T	N/A	+	+	PPARD	PA33557	NM_006238.3|NP_006229.1||||intron|||	ATTAGGCAATTAGAGGCCTGTGGCAGGAGAGCATTCGTTCCTGGACATGC[C/T]GTGGCACTGCCAGGAGACTTTACTCCAGGAATGGGGTCGTTGTCAGGAGG
1444	AM_14119	PPARD_c.-101-28005G>A	rs6937483	snp	N	6	35350759	A // B	A // G	N/A	+	+	PPARD	PA33557	NM_006238.3|NP_006229.1||||intron|||	GTGCTACTGGTAGTGCTAGCCCACTAGCCCACTGGGCAGCGACTGCACCC[A/G]TATCAGAGTGTGGAAAGCCTTGGATGCCACATTAAGGAGTTGGATTTTGT
1445	AM_14120	PPARD_c.-101-25241A>G	rs6922548	snp	N	6	35353523	A // B	G // A	N/A	+	+	PPARD	PA33557	NM_006238.3|NP_006229.1||||intron|||	CTCTCTCCTGCTGACTGTCTAAATACCACACGGAGGCCTCGCAGGGGCCT[C/T]ATAATGCGTTCAAAACACAGTCAATTATCTTCATGCCAGGCCACAGGAGT
1446	AM_14122	PPARD_c.-101-22603G>C	rs6940722	snp	N	6	35356161	A // B	C // G	N/A	+	+	PPARD	PA33557	NM_006238.3|NP_006229.1||||intron|||	GGAGCCTGGTGGGCAGCACGTGCCGCGGGGGCAGGAAGGGGAGAGCTTCC[C/G]GGAAGGGGATGGAACTTGAGCCAAACCTTTTTCTCAAAAAGAGGGGAGGC
1447	AM_14123	PPARD_c.-101-21071C>G	rs3798343	snp	N	6	35357693	A // B	C // G	N/A	+	+	PPARD	PA33557	NM_006238.3|NP_006229.1||||intron|||	CACCCTCTCTCACTGTGTCATTTCTGAAGGGCCCTGGTGACTTTCTTTGC[C/G]CCTCTCCACTCTTACAGTCATTGGAACCAGAGGGCAGAACCCCGGGCCTC
1448	AM_14124	PPARD_c.-101-19819C>T	rs6915115	snp	N	6	35358945	A // B	C // T	N/A	+	+	PPARD	PA33557	NM_006238.3|NP_006229.1||||intron|||	GCATGTAAAAATGATCTCTATCTGATATAGACATCTGATAATAGAAAATG[C/T]GGAAGAGAGCATTAACACAAAATGAATACCAAATAAAAATCACTTAATGA
1449	AM_14125	PPARD_c.-101-18890G>A	rs2299867	snp	N	6	35359874	A // B	G // A	N/A	+	+	PPARD	PA33557	NM_006238.3|NP_006229.1||||intron|||	GCTGGCACTGGCCCATGTTAGGGTTGGTGCCAGGGTTCCCCAAATTGGCC[C/T]AGGAATTCCAAGGGCAGTCCAGATGGATGAAGGAAGGCACCTCTCTCTTC
1450	AM_14126	PPARD_c.-101-16239G>A	rs7769719	snp	N	6	35362525	A // B	A // G	N/A	+	+	PPARD	PA33557	NM_006238.3|NP_006229.1||||intron|||	GAGGTGGAGGTTCCAGTGAGCCGAGATCATGCCACTGTACTCCAACCTAC[A/G]TGACAGAGTGAGACCCTGTCTCCCCGCCCCCCCCACCAAAAAAAAAAAAA
1451	AM_14127	PPARD_c.-101-15916T>C	rs6457816	snp	N	6	35362848	A // B	C // T	N/A	+	+	PPARD	PA33557	NM_006238.3|NP_006229.1||||intron|||	TGTACCTGTCATATAACTCAGCACTAATGCTCTCTCCACTGTAGCCCACT[C/T]GCTGTCTTCGCACCTTGGGACAGAGAGGGGGGTGCCAGGCATTGGATTTC
1452	AM_14128	PPARD_c.-101-15034G>A	rs4632889	snp	N	6	35363730	A // B	A // G	N/A	+	+	PPARD	PA33557	NM_006238.3|NP_006229.1||||intron|||	CCTAAGGGAGTTACTCCATGAAAGCAGCTTAGAATAATGCCTGGCACACA[A/G]AGGTGCTGTGCACTGTTTGATTCACACGGAAGCTGGGTAGGCTCCATGGA
1453	AM_14129	PPARD_c.-101-13418A>G	rs1883323	snp	N	6	35365346	A // B	A // G	N/A	+	+	PPARD	PA33557	NM_006238.3|NP_006229.1||||intron|||	GTCTGGAAAGCAGGGTCAGATACCCCTGGAAAACTGAAGCCCGTGGAGCA[A/G]TGATCTCTACAGGACTGCTTCAAGGTGCGTGGTGAACAGACGTCTTTTTG
1454	AM_14130	PPARD_c.-101-13307A>G	rs2284197	snp	N	6	35365457	A // B	A // G	N/A	+	+	PPARD	PA33557	NM_006238.3|NP_006229.1||||intron|||	AGTTGCTCCTCTGATACTTGAGGGTTATGTGAATCTAACAACAGACAAAA[A/G]TCTCTGCCTCCTGGGGCTTATATTCTTTGGGAAGAGACAAGCACTAAACA
1455	AM_14131	PPARD_c.-101-9273G>A	rs2267665	snp	N	6	35369491	A // B	A // G	N/A	+	+	PPARD	PA33557	NM_006238.3|NP_006229.1||||intron|||	AGGAAAGCGTCTCCTGGCCACTCGCACCTGACTCATGTGCTCTGAGTGCC[A/G]CACCTTGCTTGGCATTTGTCCTTCATAGCCCTGGTCATTGCTGGCTAATG
1456	AM_14132	PPARD_c.-101-8958T>C	rs1883322	snp	N	6	35369806	A // B	T // C	N/A	+	+	PPARD	PA33557	NM_006238.3|NP_006229.1||||intron|||	AAATGCTGAGAGATGCCAACGAGGTAAAGGAAAGGCCTGCTCAGGTCCCA[A/G]AAGAGACCCAGATCTCTCCTACTGAAGCCTGAATGGGCCTGAGACCCCTC
1457	AM_14133	PPARD_c.-101-8930C>T	rs1883321	snp	N	6	35369834	A // B	T // C	N/A	+	+	PPARD	PA33557	NM_006238.3|NP_006229.1||||intron|||	AAGGGGGAGACATTTTTAAAACCAAATAAAATGCTGAGAGATGCCAACGA[A/G]GTAAAGGAAAGGCCTGCTCAGGTCCCAGAAGAGACCCAGATCTCTCCTAC
1458	AM_14134	PPARD_c.-101-7011G>A	rs7751481	snp	N	6	35371753	A // B	G // A	N/A	+	+	PPARD	PA33557	NM_006238.3|NP_006229.1||||intron|||	GAACACCTTGGTCAAAGCCCTTCTGGACATTACTGCCAGAAAATGACTCC[C/T]GTGTGCTGAAGACAGCCACAGGCTCTCGTCCCTGCCTCCCTCTCCAGGCC
1459	AM_14135	PPARD_c.-101-6240C>G	rs2267667	snp	N	6	35372524	A // B	G // C	N/A	+	+	PPARD	PA33557	NM_006238.3|NP_006229.1||||intron|||	AGAAGCTTAACCCAAATGGCCCAGAGCTCTAGAGAGACCTGGTCTGGGGC[C/G]AGAGCAACTAAGCCACCTGGGGCCCAGTCCTTCCCACCAAGTCCAGTTGT
1460	AM_14136	PPARD_c.-101-4298A>G	rs2038067	snp	N	6	35374466	A // B	G // A	N/A	+	+	PPARD	PA33557	NM_006238.3|NP_006229.1||||intron|||	AAGTGGTTGCCTCTTAGACTCAGATGCAGTTCTGGACTCTGGCTAGAGTT[C/T]TGAATTTGGGACCAGGGTCTCTAGTTCCCACGCTGACATCTCTCCCTAGC
1461	AM_14137	PPARD_c.-101-3238C>A	rs6906237	snp	N	6	35375526	A // B	A // C	N/A	+	+	PPARD	PA33557	NM_006238.3|NP_006229.1||||intron|||	ATAAACTTTGAAAAAAAAGATTTCAGCTAAAATTAGTTTCCTCTCCATGC[A/C]GAGTCTGAATATATTATAAAAATAAAAGAATAATTGTCTTTCACACAATT
1462	AM_14138	PPARD_c.-101-2477C>T	rs6911817	snp	N	6	35376287	A // B	C // T	N/A	+	+	PPARD	PA33557	NM_006238.3|NP_006229.1||||intron|||	GCACCTGTGAACATTTCCTGTGCTCTGGGTCTGGTGCTTCTCAAGTTTAA[C/T]ACCCAGGGGCGAGTGGTCAGGGACTGATCCTTGAGGAACTGATGTACATT
1463	AM_14139	PPARD_c.-101-2414A>C	rs4388282	snp	N	6	35376350	A // B	A // C	N/A	+	+	PPARD	PA33557	NM_006238.3|NP_006229.1||||intron|||	GTGGTCAGGGACTGATCCTTGAGGAACTGATGTACATTAAACAAACTATC[A/C]AGTCCCTGCAATGCAGTGTAAATGAGTAAAGAGCCTGCAGGGGAGAAACT
1464	AM_14140	PPARD_c.-101-2361C>A	rs4555908	snp	N	6	35376403	A // B	A // C	N/A	+	+	PPARD	PA33557	NM_006238.3|NP_006229.1||||intron|||	TCCCTGCAATGCAGTGTAAATGAGTAAAGAGCCTGCAGGGGAGAAACTGC[A/C]ACTAGTGGAGACCATGCGAGTGGGCAGCCGATTGCTTGGCTCTGGGGGTG
1465	AM_14141	PPARD_c.-101-2350A>C	rs4292520	snp	N	6	35376414	A // B	C // A	N/A	+	+	PPARD	PA33557	NM_006238.3|NP_006229.1||||intron|||	CCTCTGGCACCCACCCCCAGAGCCAAGCAATCGGCTGCCCACTCGCATGG[G/T]CTCCACTAGTGGCAGTTTCTCCCCTGCAGGCTCTTTACTCATTTACACTG
1466	AM_14142	PPARD_c.-101-2342A>C	rs4323304	snp	N	6	35376422	A // B	A // C	N/A	+	+	PPARD	PA33557	NM_006238.3|NP_006229.1||||intron|||	ATGAGTAAAGAGCCTGCAGGGGAGAAACTGCCACTAGTGGAGACCATGCG[A/C]GTGGGCAGCCGATTGCTTGGCTCTGGGGGTGGGTGCCAGAGGCATGCAGG
1467	AM_14143	PPARD_c.-101-2085A>C	rs4587165	snp	N	6	35376679	A // B	A // C	N/A	+	+	PPARD	PA33557	NM_006238.3|NP_006229.1||||intron|||	CATTAAATCTTACATAAAGGAACACTGGTACAATACTATTAACCAAAGTC[A/C]GTGTGTTGTTCAGACCTTACCAGTTTTTCTGCCACTGCCCCCTTTCTGCT
1468	AM_14144	PPARD_c.-101-2051A>C	rs4360132	snp	N	6	35376713	A // B	A // C	N/A	+	+	PPARD	PA33557	NM_006238.3|NP_006229.1||||intron|||	ACTATTAACCAAAGTCAGTGTGTTGTTCAGACCTTACCAGTTTTTCTGCC[A/C]CTGCCCCCTTTCTGCTTCGGGGATCTGGTCCAGGATCCCACATTCATTTA
1469	AM_14145	PPARD_c.-101-1463A>C	rs1003973	snp	N	6	35377301	A // B	A // C	N/A	+	+	PPARD	PA33557	NM_006238.3|NP_006229.1||||intron|||	CAGCCTAGGCGACAGAGTGAGACTGTCTCAAAAAACAATAACAACAACAA[A/C]AAAAAAACCCATCAGAAAACAGCTAAGAGTTTTGTGGTGGTGTTTTATTT
1470	AM_14146	PPARD_c.-101-842A>G	rs2267668	snp	N	6	35377922	A // B	G // A	N/A	+	+	PPARD	PA33557	NM_006238.3|NP_006229.1||||intron|||	GAAGAAAAGATCTGCTTTAAGATGTTAAGCATCTGTGGGACCCCAACTCT[C/T]AGATATTTTACCGACAGCTCAAACTCAATCTATCCAAACAGAACCCATCA
1471	AM_14147	PPARD_c.-101-640A>G	rs2267669	snp	N	6	35378124	A // B	A // G	N/A	+	+	PPARD	PA33557	NM_006238.3|NP_006229.1||||intron|||	ATGTTTTACTTGCTAAGGGTTGGAACTGTCTCCTCCTGGGTGATGTGGAC[A/G]TGGCATCACCACCCAGTAAGTTGTCACCTTGGAAAGACTCCAGGATGGAG
1472	AM_14149	PPARD_c.489T>C(N163N)	rs2076167	snp	N	6	35391787	A // B	T // C	N/A	+	+	PPARD	PA33557	NM_006238.3|NP_006229.1|T|N|163|coding-synonymous|C|N|163	TTGGAGAAGGCCTTCAGGTCGGCCACCTGTGGGTTGTACTGGCTCCCCTC[A/G]TTTGCAGTCAGCCCTGCCACCAGCTTCCTCTTCTCAGCCTCCGGCATCCG
1473	AM_14151	PPARD_c.*1722G>A	rs1053046	snp	N	6	35395578	A // B	A // G	N/A	+	+	PPARD	PA33557	NM_006238.3|||||mrna-utr|||	GCCCAGGCTTCCTGGGTCCTGCCTGGTCCTCCCTCCCAAGGAGCCATTCT[A/G]TGTGTGACTCTGGGTGGAAGTGCCCAGCCCCTGCCCCTACGGGCGCTGCA
1474	AM_14154	SLC22A7_c.-1310T>C	rs2651185	snp	N	6	43264787	A // B	C // T	N/A	+	+	SLC22A7	PA35848	NM_153320.2|NP_696961.2||||locus-region|||	TGTACCCTCTAGAATGGCGAGGATGCACTAGAGACTCAAACATTTCTTCT[C/T]ATTGTCACCCCCTGTCACTGCCACCACCATTAGCTGCCTCTTGCTTCACT
1475	AM_14160	SLC22A7_c.979C>T(R327W)	rs36040909	snp	N	6	43269348	A // B	C // T	N/A	+	+	SLC22A7	PA35848	NM_153320.2|NP_696961.2|C|R|327|coding-nonsynonymous|T|W|327	AACCTCACCTCCTTCCCTACCAGGCTGTGAGCAAAGTGGCCGCCGGGGAA[C/T]GGGTGGTCCGAAGACCTTCATACCTAGACCTGTTCCGCACACCACGGCTC
1476	AM_14161	SLC22A7_c.1017C>A(R339R)	rs35385682	snp	N	6	43269386	A // B	C // A	N/A	+	+	SLC22A7	PA35848	NM_153320.2|NP_696961.2|C|R|339|coding-synonymous|A|R|339	CCTCACCACACCACCACGCAGCACAGTGAGATGTGTCGGAGCCGTGGTGT[G/T]CGGAACAGGTCTAGGTATGAAGGTCTTCGGACCACCCGTTCCCCGGCGGC
1477	AM_14162	SLC22A7_c.1221C>T(A407A)	rs2651184	snp	N	6	43270097	A // B	C // T	N/A	+	+	SLC22A7	PA35848	NM_153320.2|NP_696961.2|C|A|407|coding-synonymous|T|A|407	CTGCTGGTCTACTTGTCGGTGCGCTACGCAGGACGCCGCCTCACGCAAGC[C/T]GGGACACTGCTGGGCACGGCCCTGGCGTTCGGCACTAGACTGCTAGTGTC
1478	AM_14163	SLC22A7_c.1275C>T(S425S)	rs2270860	snp	N	6	43270151	A // B	C // T	N/A	+	+	SLC22A7	PA35848	NM_153320.2|NP_696961.2|C|S|425|coding-synonymous|T|S|425	ACACTGCTGGGCACGGCCCTGGCGTTCGGCACTAGACTGCTAGTGTCCTC[C/T]GGTGAGCCCAGTCCCATAGGTTCTGCCCACCCCAGAAGCCGGGCCAGGAA
1479	AM_14164	SLC22A7_c.1277-67G>A	rs2841646	snp	N	6	43270326	A // B	G // A	N/A	+	+	SLC22A7	PA35848	NM_153320.2|NP_696961.2||||intron|||	TCAGGTAGTGAGAGGGCCTTGGAGGAGAGCCAGGGGTGTTCTGGATAGGG[C/T]GCGGAGTCTCCAGAGTGGGCCAAACTTAAGTGGTGGAGAGTCTGAGCTCA
1480	AM_14166	SLC22A7_c.563A>G(I188T)	rs2242416	snp	N	6	43273604	A // B	A // G	N/A	+	+	SLC22A7	PA35848	NM_206922.2|NP_996805.2|T|I|188|coding-nonsynonymous|C|T|188	ATTTGAATTTTATCTTCACTGGGTCATAGATGTAGCAGCCCACATCGCCA[A/G]TGTTCACACCTGAGAGAGAGAGCCCTATCACCAAAGGCCCTGGGTCTGTG
1481	AM_14169	SLC29A1_c.84G>A(P28P)	rs8187630	snp	N	6	44197181	A // B	A // G	N/A	+	+	SLC29A1	PA154	NM_004955.2|NP_004946.1|G|P|28|coding-synonymous|A|P|28	AAAGCTGTCTGGCTTATCTTCTTCATGCTGGGTCTGGGAACGCTGCTCCC[A/G]TGGAATTTTTTCATGACGGCCACTCAGGTGAGGCTGGAGGGACTGGGCTC
1482	AM_14170	SLC29A1_c.597G>A(S199S)	rs8187640	snp	N	6	44198312	A // B	G // A	N/A	+	+	SLC29A1	PA154	NM_004955.2|NP_004946.1|G|S|199|coding-synonymous|A|S|199	ATAACAGCACAGGCTGTGATAAAGTAGCCGAAGGCACTTTCTGATAGCTC[C/T]GAGCCACCTGGGGTGGTGTCAGTGATCAGAGACAGGCCCCATCCCCTCTC
1483	AM_14171	SLC29A1_c.647T>C(I216T)	rs45573936	snp	N	6	44198362	A // B	T // C	N/A	+	+	SLC29A1	PA154	NM_004955.2|NP_004946.1|T|I|216|coding-nonsynonymous|C|T|216	ATTTACTCACCAGGCGGGGCAGGCCCAGGTAACAGATGATGGTCAAAATG[A/G]TAACAGCACAGGCTGTGATAAAGTAGCCGAAGGCACTTTCTGATAGCTCC
1484	AM_14172	SLC29A1_c.687G>A(L229L)	rs8187642	snp	N	6	44198402	A // B	G // A	N/A	+	+	SLC29A1	PA154	NM_004955.2|NP_004946.1|G|L|229|coding-synonymous|A|L|229	GGAACCCCAGACCCCTATACCCCAAACCCCAGCTCCCTCCATTTACTCAC[C/T]AGGCGGGGCAGGCCCAGGTAACAGATGATGGTCAAAATGATAACAGCACA
1485	AM_14173	SLC29A1_c.864+4C>T	rs186556	snp	N	6	44199202	A // B	C // T	N/A	+	+	SLC29A1	PA154	NM_004955.2|NP_004946.1||||intron|||	CTCAGCCCACCAATGAAAGCCACTCTATCAAAGCCATCCTGAAAAATGTA[C/T]GTAGGGGAGGTTATCCTATCTTCTACCCCTTGTCCTCTTTCTCTCCTCCT
1486	AM_14174	SLC29A1_c.999T>C(C333C)	rs8187633	snp	N	6	44200105	A // B	T // C	N/A	+	+	SLC29A1	PA154	NM_004955.2|NP_004946.1|T|C|333|coding-synonymous|C|C|333	ACAGCTGTGAGGCTCCGGCCCAACCAGTCAAAGATATTGAAAGTCAAGAA[A/G]CAGGACACAGGAATGAAGTAACGTTCTGGAAGAGGAGATGAACGGGTGGT
1487	AM_14176	SLC29A1_c.1171G>A(E391K)	rs45458701	snp	N	6	44200655	A // B	G // A	N/A	+	+	SLC29A1	PA154	NM_004955.2|NP_004946.1|G|E|391|coding-nonsynonymous|A|K|391	GTTGGAGAAGGCAAAGGCAGCCATGAAGAAGATGAACCAGGCATCGTGCT[C/T]GAAGACCACAGTCAGGTAGCGGCGGGGCTTAATGTTGCACAGCAGCAGCA
1488	AM_14177	SLC29A1_c.*46C>A	rs8187637	snp	N	6	44201311	A // B	C // A	N/A	+	+	SLC29A1	PA154	NM_004955.2|||||mrna-utr|||	AAAAAACCGCCAGACCACTCAGGATCACCCCTGGCAGAAGGAAGGGGCAG[G/T]AGGCAGACAGGGAGGGAGGCAGGCAGTCCTTCTGTCCATCCTTTGTCACA
1489	AM_14178	SLC29A1_c.*442G>A	rs14623	snp	N	6	44201707	A // B	A // G	N/A	+	+	SLC29A1	PA154	NM_004955.2|||||mrna-utr|||	TGGGTCTGACCGTTGTATGGTTTGACCTGATATACTCCATTCTCCCCTGC[A/G]CCTCCTCCTCTGTGTTCTCTCCATGTCCCCCTCCCAACTCCCCATGCCCA
1490	AM_14196	CYP39A1_c.972T>A(N324K)	rs7761731	snp	N	6	46563817	A // B	A // T	N/A	-	-	CYP39A1	PA38452	NM_016593.3|NP_057677.2|T|N|324|coding-nonsynonymous|A|K|324	TTTTTTACAGGCAAAGATAAGATTAAAGTGTCTGAGGATGACCTGGAGAA[A/T]CTCCTTCTAATTAAATGGTGTGTTTTGGAAACCATTCGTTTAAAAGCTCC
1491	AM_14216	CYP39A1_c.308G>A(R103H)	rs2277119	snp	N	6	46609905	A // B	A // G	N/A	-	-	CYP39A1	PA38452	NM_016593.3|NP_057677.2|G|R|103|coding-nonsynonymous|A|H|103	AAAATCCAAAAAAGTAGATTTTGAACTAGCAGTGCAAAATATCGTTTATC[A/G]TACAGGTAAAGAATATTTTCAGATAGTCCATTCGAAATCCAACATTGGAA
1492	AM_14223	CYP39A1_c.49C>G(L17V)	rs59926524	snp	N	6	46620271	A // B	G // C	N/A	-	-	CYP39A1	PA38452	NM_016593.3|NP_057677.2|C|L|17|coding-nonsynonymous|G|V|17	CTTGATGCACGGGGGTCTACGCAAATTCTTCCGCTGAAGGAGTAAGAACA[C/G]AGCAAGGCAACCCAGGATTATAATCACTGTTGGGGAAATTAGTTCCATGT
1493	AM_14224	CYP39A1_c.-118C>G	rs66992975	snp	N	6	46620437	A // B	C // G	N/A	-	-	CYP39A1	PA38452	NM_016593.3|||||mrna-utr|||	ACCTGAAAACTGGGACAGAGGAAGGAAGCTACAGTTACGAAGGAGAGCTG[C/G]AAAAGTTGCAGCAGAAAGGTTGGGAGTCCCGACAGGTTCCGTAGCCCACA
1494	AM_14225	SLC25A27_c.298+766C>G	rs9369629	snp	N	6	46624537	A // B	G // C	N/A	-	-	SLC25A27	PA38452	NM_004277.3|NP_004268.3||||intron|||	ATTAACTACTGATTATTATTAAGAAGTTACTGTCCTAAATTTTTAGAAAC[C/G]CATACTCACGTATTTAGGGATGAACTGTCATGAAATCTGTAAACCACTTT
1495	AM_14226	SLC25A27_c.299-1425C>T	rs9381468	snp	N	6	46625274	A // B	C // T	N/A	-	-	SLC25A27	PA38452	NM_004277.3|NP_004268.3||||intron|||	TGAAAAGTAAATAATATGTAACTCCCTCTATCTCTACCATTGAGATTTAT[C/T]AACTGCTAACATTTTTGCCATATTTCCTTAATTTTCTAACTTTTTAAATT
1496	AM_14227	SLC25A27_c.299-346T>C	rs953062	snp	N	6	46626353	A // B	T // C	N/A	-	-	SLC25A27	PA38452	NM_004277.3|NP_004268.3||||intron|||	ACATAGAGCCTGCCTGGAGAAGCTCATGGTCTGATGGAAAGATAAGCAAG[A/G]AGAGTTAATTTCTAATCAATATGATAAAAAGGTCAGAGAGCAGTTTCTGA
1497	AM_14231	GSTA2_c.*149T>A	rs2234952	snp	N	6	52615226	A // B	A // T	N/A	-	-	GSTA2	PA29017	NM_000846.4|||||mrna-utr|||	GCTAATGAACTCTTTCAAATTATATGCTAATTAAATAATACAACTCCTAT[A/T]CACCCACTTAGTTAAAATTGATTTCTTCTCATTAGGATCTGATGTGAATT
1498	AM_14233	GSTA2_c.*22G>A	rs2266632	snp	N	6	52615353	A // B	A // G	N/A	-	-	GSTA2	PA29017	NM_000846.4|||||mrna-utr|||	AAGAATCAAGGAAGATTTTCAGGTTTTAATAAACCAGCCATAGAGGTCAA[A/G]AACATGCAAGACCAGTATTCTAAAGTTTTGCAACAATTAAGTGCTTTACC
1499	AM_14234	GSTA2_c.629A>C(E210A)	rs6577	snp	N	6	52615415	A // B	A // C	N/A	-	-	GSTA2	PA29017	NM_000846.4|NP_000837.3|A|E|210|coding-nonsynonymous|C|A|210	AGTGAAGAAGTTTCTACAGCCTGGCAGCCCAAGGAAGCCTCCCATGGATG[A/C]GAAATCTTTAGAAGAATCAAGGAAGATTTTCAGGTTTTAATAAACCAGCC
1500	AM_14238	GSTA2_c.402T>C(P134P)	rs13212306	snp	N	6	52617664	A // B	C // T	N/A	-	-	GSTA2	PA29017	NM_000846.4|NP_000837.3|T|P|134|coding-synonymous|C|P|134	GATGCCAAGCTTGCCTTGATCCAAGAGAAAACAAAAAATCGCTACTTCCC[C/T]GCCTTTGAAAAAGTAAGTGAAGCTGTTCAGTGTTTTGGGGAACTGAGTTT
1501	AM_14240	GSTA2_c.335G>C(S112T)	rs2180314	snp	N	6	52617731	A // B	G // C	N/A	-	-	GSTA2	PA29017	NM_000846.4|NP_000837.3|G|S|112|coding-nonsynonymous|C|T|112	TTGTTTTCTCTTGGATCAAGGCAAGCTTGGCATCTTGTTCCTCAGGTTGA[C/G]TAAAGGGCAGAAGAAGGATCATTTCACCCAAATCTGCTATACCTTCTATA
1502	AM_14241	GSTA2_c.328C>T(P110S)	rs2234951	snp	N	6	52617738	A // B	T // C	N/A	-	-	GSTA2	PA29017	NM_000846.4|NP_000837.3|C|P|110|coding-nonsynonymous|T|S|110	CTCTTGGATCAAGGCAAGCTTGGCATCTTGTTCCTCAGGTTGACTAAAGG[A/G]CAGAAGAAGGATCATTTCACCCAAATCTGCTATACCTTCTATATACATAT
1503	AM_14244	GSTA2_c.-10G>C	rs1803684	snp	N	6	52622755	A // B	C // G	N/A	-	-	GSTA2	PA29017	NM_000846.4|||||mrna-utr|||	ATTCATTCATTCATTCATTCATTCACTCAGGCTTAGAGAAACCTCCAGGA[C/G]ACTGCTACCATGGCAGAGAAGCCCAAGCTCCACTACTCCAATATACGGGG
1504	AM_14251	GSTA1_c.519T>C(S173S)	rs1051874	snp	N	6	52657681	A // B	T // C	N/A	-	-	GSTA1	PA29016	NM_145740.3|NP_665683.1|T|S|173|coding-synonymous|C|S|173	CTCTGGGCTGTGAAATGGGTCACCTTCAGCAGAGGGAAGCTGGAGATAAG[A/G]CTGGAGTCAAGCTCCTCGACGTAGTAGAGAAGTTCCACCAGATGAATGTC
1505	AM_14252	GSTA1_c.516C>T(S172S)	rs1051873	snp	N	6	52657684	A // B	C // T	N/A	-	-	GSTA1	PA29016	NM_145740.3|NP_665683.1|C|S|172|coding-synonymous|T|S|172	GCTGACATTCATCTGGTGGAACTTCTCTACTACGTCGAGGAGCTTGACTC[C/T]AGTCTTATCTCCAGCTTCCCTCTGCTGAAGGTGACCCATTTCACAGCCCA
1506	AM_14253	GSTA1_c.504G>A(E168E)	rs3209670	snp	N	6	52657696	A // B	A // G	N/A	-	-	GSTA1	PA29016	NM_145740.3|NP_665683.1|G|E|168|coding-synonymous|A|E|168	AAGCTGAGCCGGGCTGACATTCATCTGGTGGAACTTCTCTACTACGTCGA[A/G]GAGCTTGACTCCAGTCTTATCTCCAGCTTCCCTCTGCTGAAGGTGACCCA
1507	AM_14254	GSTA1_c.501C>G(V167V)	rs1051866	snp	N	6	52657699	A // B	G // C	N/A	-	-	GSTA1	PA29016	NM_145740.3|NP_665683.1|C|V|167|coding-synonymous|G|V|167	GTCACCTTCAGCAGAGGGAAGCTGGAGATAAGACTGGAGTCAAGCTCCTC[C/G]ACGTAGTAGAGAAGTTCCACCAGATGAATGTCAGCCCGGCTCAGCTTGTT
1508	AM_14258	GSTA1_c.382A>C(I128L)	rs1051777	snp	N	6	52658955	A // B	A // C	N/A	-	-	GSTA1	PA29016	NM_145740.3|NP_665683.1|A|I|128|coding-nonsynonymous|C|L|128	TATGTCCACCTGAGGAAAAAGATGCCAAGCTTGCCTTGATCAAAGAGAAA[A/C]TAAAAAATCGCTACTTCCCTGCCTTTGAAAAAGTAAGTGAAGCAGTTCAG
1509	AM_14261	GSTA1_c.349A>C(K117Q)	rs1051757	snp	N	6	52658988	A // B	A // C	N/A	-	-	GSTA1	PA29016	NM_145740.3|NP_665683.1|A|K|117|coding-nonsynonymous|C|Q|117	CAGATTTGGGTGAAATGATCCTCCTTCTGCCCGTATGTCCACCTGAGGAA[A/C]AAGATGCCAAGCTTGCCTTGATCAAAGAGAAAATAAAAAATCGCTACTTC
1510	AM_14262	GSTA1_c.338C>A(P113Q)	rs1051745	snp	N	6	52658999	A // B	A // C	N/A	-	-	GSTA1	PA29016	NM_145740.3|NP_665683.1|C|P|113|coding-nonsynonymous|A|Q|113	AGAAGGTATAGCAGATTTGGGTGAAATGATCCTCCTTCTGCCCGTATGTC[A/C]ACCTGAGGAAAAAGATGCCAAGCTTGCCTTGATCAAAGAGAAAATAAAAA
1511	AM_14263	GSTA1_c.335G>C(C112S)	rs1051739	snp	N	6	52659002	A // B	C // G	N/A	-	-	GSTA1	PA29016	NM_145740.3|NP_665683.1|G|C|112|coding-nonsynonymous|C|S|112	TATAGAAGGTATAGCAGATTTGGGTGAAATGATCCTCCTTCTGCCCGTAT[C/G]TCCACCTGAGGAAAAAGATGCCAAGCTTGCCTTGATCAAAGAGAAAATAA
1512	AM_14270	GSTA1_c.35C>T(A12V)	rs1051573	snp	N	6	52664031	A // B	C // T	N/A	-	-	GSTA1	PA29016	NM_145740.3|NP_665683.1|C|A|12|coding-nonsynonymous|T|V|12	CCAGGAGACTGCTATCATGGCAGAGAAGCCCAAGCTCCACTACTTCAATG[C/T]ACGGGGCAGAATGGAGTCCACCCGGTGGCTCCTGGCTGCAGCTGGAGTAG
1513	AM_14271	GSTA1_c.34G>A(A12T)	rs1051566	snp	N	6	52664032	A // B	A // G	N/A	-	-	GSTA1	PA29016	NM_145740.3|NP_665683.1|G|A|12|coding-nonsynonymous|A|T|12	TCCAGGAGACTGCTATCATGGCAGAGAAGCCCAAGCTCCACTACTTCAAT[A/G]CACGGGGCAGAATGGAGTCCACCCGGTGGCTCCTGGCTGCAGCTGGAGTA
1514	AM_14286	GSTA1_c.-5120T>G	rs4715332	snp	N	6	52669185	A // B	T // G	N/A	-	-	GSTA1	PA29016	NM_145740.3|||||mrna-utr|||	TATCTGAAATTCACATTTAGGTGGGTATCCTGTATTTTATCTGACAAATC[A/C]AGAGACCCTATTTGCATATGCTATCCTCTTTGCGTCACTCAAATTGCCCA
1515	AM_14287	GSTA1_c.-5184G>T	rs4715333	snp	N	6	52669249	A // B	T // G	N/A	-	-	GSTA1	PA29016	NM_145740.3|||||mrna-utr|||	GCATATGCTATCCTCTTTGCGTCACTCAAATTGCCCATAATATAACAAAT[A/C]TGAAAGTATTCATCACCTGGATTCATCAATTGCAAATAATCTTATTTCAC
1516	AM_14291	GSTA5_c.389A>G(N130S)	rs61734384	snp	N	6	52698964	A // B	A // G	N/A	-	-	GSTA5	PA134962856	NM_153699.1|NP_714543.1|A|N|130|coding-nonsynonymous|G|S|130	ACCAGAGGAAAGAGATGCCAAGACTGCCTTGGTCAAAGAGAAAATAAAAA[A/G]TCGCTACTTCCCTGCCTTTGAAAAAGTAAGTGAAGCTGTTCAATGTTTAG
1517	AM_14292	GSTA5_c.273-1G>A	rs4515385	snp	N	6	52699081	A // B	G // A	N/A	-	-	GSTA5	PA134962856	NM_153699.1|NP_714543.1||||splice-site|||	GAAGGATCATTTCAGTCAAATCTACTATACCTTCTGTGTACATATCAATC[C/T]TGAAAGACAAAAACAACCAAACCATCAAATGCCTTTTGCCTTAGATTTTA
1518	AM_14293	GSTA5_c.163A>G(I55V)	rs2397118	snp	N	6	52701143	A // B	A // G	N/A	-	-	GSTA5	PA134962856	NM_153699.1|NP_714543.1|A|I|55|coding-nonsynonymous|G|V|55	TACTCCTTTTTTTTTCTTCTTTCTAAGATGGGAGTTTGCTGTTCCAGCAA[A/G]TACCAATGGTTGAGATTGACGGGATGAAGCTGGTGCAGACCAGAGCCATT
1519	AM_14296	GSTA5_c.-31+2057C>T	rs4715354	snp	N	6	52708797	A // B	C // T	N/A	-	-	GSTA5	PA134962856	NM_153699.1|NP_714543.1||||intron|||	GAGGAGCATGTGTGTGTGACCCATGGCAAATCCTTGAGCTCTCAGGTTCT[C/T]ATTTTGTGTTGACTGAACAAAGCTCAACGGTAACCTCTGCCCCAGTCTTA
1520	AM_14297	GSTA5_c.-31+1737C>T	rs7748890	snp	N	6	52709117	A // B	C // T	N/A	-	-	GSTA5	PA134962856	NM_153699.1|NP_714543.1||||intron|||	CTAAGAGTAAGAACTCATGAATTAGATGTTCCCCTCTCACCCTCTCCTTC[C/T]AACATTTAGTTGGCTAATATACTATGAATAGAAAAATATAAAACAACATA
1521	AM_14298	GSTA5_-8526G>T	rs7746993	snp	N	6	52714137	A // B	G // T	N/A	-	-	GSTA5	PA134962856	NM_153699.1||||||||	ATGTGGCAGCAGGTGCTAAGCCCCTGGCCCATGTGGAAGAAGCAAGCTGG[G/T]CGGGTGGTGTAGATGCCACAGTGATGTGGATGAGAAGAGAAAATGAGAGC
1522	AM_14299	GSTA5_-8962C>T	rs7747555	snp	N	6	52714573	A // B	T // C	N/A	-	-	GSTA5	PA134962856	NM_153699.1||||||||	AAATACAAAATCTTCCTCTGCATCCCACAGTCACTCTCCTTTTAATAAAT[A/G]CCCATCCCTGAAACACTACAATATTCTCTGGTTGGGCAATTGGTCTTGTG
1523	AM_14303	GSTA3_c.401_402insC(P134X)	rs72552760	in-del	N	6	52764744	A // B	C // CC	N/A	-	-	GSTA3	PA29018	NM_000847.4|NP_000838.3|-|-|134|coding-nonsynonymous|C|P|134	AGATGCCAAGATTGCCTTGATCAAAGAGAAAACAAAAAGTCGCTATTTCC[C/CC]TGCCTTCGAAAAAGTAGGTGAAGCTGTTCAGCATTTTGGGGCACTGAGTT
1524	AM_14306	GSTA3_c.272+161A>G	rs512795	snp	N	6	52766983	A // B	G // A	N/A	-	-	GSTA3	PA29018	NM_000847.4|NP_000838.3||||intron|||	CATCCTCTTCTAGAATCACACTCACCTGAACCCTCCTCACGTTCACTGTT[C/T]CCTCATCCCCATGGGACTCTGCAATACTGGACCTCAGTATACACGCCCAA
1525	AM_14307	GSTA3_c.272+116C>T	rs2281593	snp	N	6	52767028	A // B	T // C	N/A	-	-	GSTA3	PA29018	NM_000847.4|NP_000838.3||||intron|||	CTGTTTCCTCATCCCCATGGGACTCTGCAATACTGGACCTCAGTATACAC[A/G]CCCAAGGCCCAGCCTGCTCCTGGTCATGATGCCCTGTCATGGTCTCACCC
1526	AM_14309	GSTA3_c.211A>C(I71L)	rs1052661	snp	N	6	52767205	A // B	A // C	N/A	-	-	GSTA3	PA29018	NM_000847.4|NP_000838.3|A|I|71|coding-nonsynonymous|C|L|71	AAGTACCAATGGTTGAGATTGATGGGATGAAGTTGGTACAGACCAGAGCC[A/C]TTCTCAACTACATTGCCAGCAAATACAACCTCTACGGGAAAGACATAAAG
1527	AM_14310	GSTA3_c.189G>T(M63I)	rs17851798	snp	N	6	52767227	A // B	G // T	N/A	-	-	GSTA3	PA29018	NM_000847.4|NP_000838.3|G|M|63|coding-nonsynonymous|T|I|63	GATGGGAGTTTGATGTTCCAGCAAGTACCAATGGTTGAGATTGATGGGAT[G/T]AAGTTGGTACAGACCAGAGCCATTCTCAACTACATTGCCAGCAAATACAA
1528	AM_14314	GSTA3_c.37C>T(R13W)	rs59410661	snp	N	6	52770596	A // B	T // C	N/A	-	-	GSTA3	PA29018	NM_000847.4|NP_000838.3|C|R|13|coding-nonsynonymous|T|W|13	CTCCACTCCAGCTGCAGCCAAGAGCCACCGGATGGGCTCCATTCTGCCCC[A/G]TCCATTGAAGTAGTGAAGCTTGGGCTTCCCTGCCATGGTAACAGTCTCTT
1529	AM_14315	GSTA3_c.-45G>A	rs9474342	snp	N	6	52774462	A // B	G // A	N/A	-	-	GSTA3	PA29018	NM_000847.4|||||mrna-utr|||	ATGAAGATGTTTAAGGTCAATACTAACTTGAGTAAAGTCTAGCCGGTCTC[C/T]GCTCAGCTTCTCAAGGCCACCTCCTGATGTGTATGTTAGCTGTTTTAATA
1530	AM_14321	GSTA4_c.*487G>A	rs405729	snp	N	6	52842781	A // B	A // G	N/A	-	-	GSTA4	PA29019	NM_001512.3|||||mrna-utr|||	CTCTCCTCTGAGCTGTAATAAATAAAATGGTAGTAATGAATGCAATCAGT[A/G]TTAGCCAAAATAAAGAATTTATGAGTCATTGCTCATTGTCTTGTTGTGAG
1531	AM_14322	GSTA4_c.*429G>A	rs7496	snp	N	6	52842839	A // B	A // G	N/A	-	-	GSTA4	PA29019	NM_001512.3|||||mrna-utr|||	CCCTCCAGTCTCTGCCTAATTTTTAGTGTTTAATAACAACCGAATGTCTA[A/G]TAAATGACTCTCCTCTGAGCTGTAATAAATAAAATGGTAGTAATGAATGC
1532	AM_14324	GSTA4_c.*137A>C	rs367836	snp	N	6	52843131	A // B	A // C	N/A	-	-	GSTA4	PA29019	NM_001512.3|||||mrna-utr|||	GGTGCTATCTATGTATTAAGTTGGGTCCTAAGTTGGGTCTTTTGTGTCAA[A/C]GAGATCATCTCTTCTAGAAATATCAACCTTTTTTGTCCAGTAAATAATTG
1533	AM_14328	GSTA4_c.487A>G(T163A)	rs4147617	snp	N	6	52847431	A // B	A // G	N/A	-	-	GSTA4	PA29019	NM_001512.3|NP_001503.1|A|T|163|coding-nonsynonymous|G|A|163	GCTTTCTTGTTGGTAATCAGCTGAGCCTTGCAGATGTGATTTTACTCCAA[A/G]CCATTTTAGCTCTAGAAGAGAAAATTCCTAATATCCTGTCTGCATTTCCT
1534	AM_14329	GSTA4_c.351G>A(Q117Q)	rs1802061	snp	N	6	52849325	A // B	A // G	N/A	-	-	GSTA4	PA29019	NM_001512.3|NP_001503.1|G|Q|117|coding-synonymous|A|Q|117	GATCTGCTGGAACTGCTTATCATGCATCCTTTCTTAAAACCAGATGATCA[A/G]CAAAAGGAAGTGGTTAACATGGCCCAGAAGGCTATAATTAGATACTTTCC
1535	AM_14336	GSTA4_c.-1366A>G	rs13197674	snp	N	6	52860407	A // B	G // A	N/A	-	-	GSTA4	PA29019	NM_001512.3|NP_001503.1||||locus-region|||	CTAAGTGTAAAGTTGAGACTTCCTTCAGGTTTATATAGCTTGTGCGCCGC[C/T]TGGGTACCTCGGATGTGAGGGCGATCTGGCTGCGACATCTGTCACCCCAT
1536	AM_14337	GSTA4_c.-1367A>G	rs6909523	snp	N	6	52860408	A // B	G // A	N/A	-	-	GSTA4	PA29019	NM_001512.3|NP_001503.1||||locus-region|||	TAAGTGTAAAGTTGAGACTTCCTTCAGGTTTATATAGCTTGTGCGCCGCT[C/T]GGGTACCTCGGATGTGAGGGCGATCTGGCTGCGACATCTGTCACCCCATT
1537	AM_14340	GSTM2_389G>T	rs1056795	snp	N	6	111368336	A // B	G // T	N/A			GSTM2	PA29023	NM_000848.3|NP_000839.1||||locus-region|||	ATAGCTGCTTCCCCAGAAACTGTGAGTAGAGCTTCAGCATTGCAGGGAGT[G/T]CCTCCAGGTATTCTGGCTTCAGTTTCTTAAAATCTGGGTTGTAGCAGAGT
1538	AM_14342	SLC22A1_c.41C>T(S14F)	rs34447885	snp	Y	6	160543008	A // B	C // T	N/A	+	+	SLC22A1	PA329	NM_003057.2|NP_003048.1|C|S|14|coding-nonsynonymous|T|F|14	CTGAGCCATCATGCCCACCGTGGATGACATTCTGGAGCAGGTTGGGGAGT[C/T]TGGCTGGTTCCAGAAGCAAGCCTTCCTCATCTTATGCCTGCTGTCGGCTG
1539	AM_14343	SLC22A1_c.54insC	rs72552761	in-del	Y	6	160543021	A // B	- // C	N/A	+	+	SLC22A1	PA329	||||||||	GATGGGCGCAAAGGCAGCCGACAGCAGGCATAAGATGAGGAAGGCTTGCTT[-/G]CTGGAACCAGCCAGACTCCCCAACCTGCTCCAGAATGTCATCCACGGTGG
1540	AM_14344	SLC22A1_c.67C>G(L23V)	rs34570655	snp	Y	6	160543034	A // B	C // G	N/A	+	+	SLC22A1	PA329	NM_003057.2|NP_003048.1|C|L|23|coding-nonsynonymous|G|V|23	ACATTCTGGAGCAGGTTGGGGAGTCTGGCTGGTTCCAGAAGCAAGCCTTC[C/G]TCATCTTATGCCTGCTGTCGGCTGCCTTTGCGCCCATCTGTGTGGGCATC
1541	AM_14345	SLC22A1_c.113G>A(G38D)	rs35888596	snp	Y	6	160543080	A // B	A // G	N/A	+	+	SLC22A1	PA329	NM_003057.2|NP_003048.1|G|G|38|coding-nonsynonymous|A|D|38	CTTCCTCATCTTATGCCTGCTGTCGGCTGCCTTTGCGCCCATCTGTGTGG[A/G]CATCGTCTTCCTGGGTTTCACACCTGACCACCACTGCCAGAGTCCTGGGG
1542	AM_14347	SLC22A1_c.156T>C(S52S)	rs1867351	snp	Y	6	160543123	A // B	T // C	N/A	+	+	SLC22A1	PA329	NM_003057.2|NP_003048.1|T|S|52|coding-synonymous|C|S|52	TCCTCCGCAGGGCTCCAGCCACAGCGCTGGCTCAGCTCAGCCACCCCAGG[A/G]CTCTGGCAGTGGTGGTCAGGTGTGAAACCCAGGAAGACGATGCCCACACA
1543	AM_14348	SLC22A1_c.181C>T(R61C)	rs12208357	snp	Y	6	160543148	A // B	C // T	N/A	+	+	SLC22A1	PA329	NM_003057.2|NP_003048.1|C|R|61|coding-nonsynonymous|T|C|61	TCACACCTGACCACCACTGCCAGAGTCCTGGGGTGGCTGAGCTGAGCCAG[C/T]GCTGTGGCTGGAGCCCTGCGGAGGAGCTGAACTATACAGTGCCAGGCCTG
1544	AM_14349	SLC22A1_c.253C>T(L85F)	rs35546288	snp	Y	6	160543220	A // B	C // T	N/A	+	+	SLC22A1	PA329	NM_003057.2|NP_003048.1|C|L|85|coding-nonsynonymous|T|F|85	AGGAGCTGAACTATACAGTGCCAGGCCTGGGGCCCGCGGGCGAGGCCTTC[C/T]TTGGCCAGTGCAGGCGCTATGAAGTGGACTGGAACCAGAGCGCCCTCAGC
1545	AM_14350	SLC22A1_c.262T>C(C88R)	rs55918055	snp	Y	6	160543229	A // B	C // T	N/A	+	+	SLC22A1	PA329	NM_003057.2|NP_003048.1|T|C|88|coding-nonsynonymous|C|R|88	ACTATACAGTGCCAGGCCTGGGGCCCGCGGGCGAGGCCTTCCTTGGCCAG[C/T]GCAGGCGCTATGAAGTGGACTGGAACCAGAGCGCCCTCAGCTGTGTAGAC
1546	AM_14351	SLC22A1_c.480C>G(F160L)	rs683369	snp	N	6	160551204	A // B	C // G	N/A	+	+	SLC22A1	PA329	NM_003057.2|NP_003048.1|C|F|160|coding-nonsynonymous|G|L|160	GACTCCTGGAAGCTGGACCTCTTTCAGTCCTGTTTGAATGCGGGCTTCTT[C/G]TTTGGCTCTCTCGGTGTTGGCTACTTTGCAGACAGGTATGTAAAGGCCAG
1547	AM_14353	SLC22A1_c.566C>T(S189L)	rs34104736	snp	N	6	160553314	A // B	C // T	N/A	+	+	SLC22A1	PA329	NM_003057.2|NP_003048.1|C|S|189|coding-nonsynonymous|T|L|189	GTTTGGCCGTAAGCTGTGTCTCCTGGGAACTGTGCTGGTCAACGCGGTGT[C/T]GGGCGTGCTCATGGCCTTCTCGCCCAACTACATGTCCATGCTGCTCTTCC
1548	AM_14354	SLC22A1_c.659G>T(G220V)	rs36103319	snp	N	6	160553407	A // B	G // T	N/A	+	+	SLC22A1	PA329	NM_003057.2|NP_003048.1|G|G|220|coding-nonsynonymous|T|V|220	GCTCTTCCGCCTGCTGCAGGGCCTGGTCAGCAAGGGCAACTGGATGGCTG[G/T]CTACACCCTAAGTAATTATCATGGGGATGAGGCCAGGTCTCAGGGTAGAA
1549	AM_14357	SLC22A1_c.848C>T(P283L)	rs4646277	snp	N	6	160557260	A // B	C // T	N/A	+	+	SLC22A1	PA329	NM_003057.2|NP_003048.1|C|P|283|coding-nonsynonymous|T|L|283	AGACCGAGGAAAATGCCAGATAGTGATGAGTGGTGTTCGCAGGTGTGTGC[C/T]GGAGTCCCCTCGGTGGCTGTTATCACAAAAAAGAAACACTGAAGCAATAA
1550	AM_14358	SLC22A1_c.859C>G(R287G)	rs4646278	snp	N	6	160557271	A // B	G // C	N/A	+	+	SLC22A1	PA329	NM_003057.2|NP_003048.1|C|R|287|coding-nonsynonymous|G|G|287	GTCCATTATCTTTATTGCTTCAGTGTTTCTTTTTTGTGATAACAGCCACC[C/G]AGGGGACTCCGGCACACACCTGCGAACACCACTCATCACTATCTGGCATT
1551	AM_14359	SLC22A1_c.1022C>T(P341L)	rs2282143	snp	N	6	160557643	A // B	C // T	N/A	+	+	SLC22A1	PA329	NM_003057.2|NP_003048.1|C|P|341|coding-nonsynonymous|T|L|341	GGATGTCACCGAAAAGCTGAGCCCTTCATTTGCAGACCTGTTCCGCACGC[C/T]GCGCCTGAGGAAGCGCACCTTCATCCTGATGTACCTGTGGTGAGGGGCGT
1552	AM_14361	SLC22A1_c.1201G>A(G401S)	rs34130495	snp	N	6	160560824	A // B	A // G	N/A	+	+	SLC22A1	PA329	NM_003057.2|NP_003048.1|G|G|401|coding-nonsynonymous|A|S|401	TGGTCGAAATCCCGGGGGCCTTCATAGCCCTCATCACCATTGACCGCGTG[A/G]GCCGCATCTACCCCATGGCCATGTCAAATTTGTTGGCGGGGGCAGCCTGC
1553	AM_14362	SLC22A1_c.1209C>T(I403I)	rs35373824	snp	N	6	160560832	A // B	C // T	N/A	+	+	SLC22A1	PA329	NM_003057.2|NP_003048.1|C|I|403|coding-synonymous|T|I|403	ATCCCGGGGGCCTTCATAGCCCTCATCACCATTGACCGCGTGGGCCGCAT[C/T]TACCCCATGGCCATGTCAAATTTGTTGGCGGGGGCAGCCTGCCTCGTCAT
1554	AM_14363	SLC22A1_c.1222G>A(V408M)	rs628031	snp	N	6	160560845	A // B	A // G	N/A	+	+	SLC22A1	PA329	NM_003057.2|NP_003048.1|G|V|408|coding-nonsynonymous|A|M|408	TCATAGCCCTCATCACCATTGACCGCGTGGGCCGCATCTACCCCATGGCC[A/G]TGTCAAATTTGTTGGCGGGGGCAGCCTGCCTCGTCATGATTTTTATCTCA
[truncated: 382 more rows]
