# Supplementary material for: Effect of donor GSTM3 rs7483 genetic variant on tacrolimus elimination in the early period after liver transplantation
Source: PeerJ. 2024 Oct 23;12:e18360. doi: 10.7717/peerj.18360 (PMC11512548; doi:10.7717/peerj.18360)
Supplement: Supplemental Information 3 — In Cohort A (n=110), the raw data includes genetic variants and clinical characteristics. [file peerj-12-18360-s003.xls]

## Sheet: 110
Patient No	Donor rs7483 genotype	Recipient rs7483 genotype	Donor rs776746 genotype	Recipient rs776746 genotype	Tac C/D(week1)	LOG1	Tac C/D (week2)	LOG2	Tac C/D (week3)	LOG3	Tac C/D (week4)	LOG4	age	gender（Male：0；Female：1）	Child-Pugh	Hb(Week1)	Hb(Week2)	Hb(Week3)	Hb(Week4)	Hct(Week1)	Hct(Week2)	Hct(Week3)	Hct(Week4)	ALT(Week1)	ALT(Week2)	ALT(Week3)	ALT(Week4)	AST(Week1)	AST(Week2)	AST(Week3)	AST(Week4)	DB(Week1)	DB(Week2)	DB(Week3)	DB(Week4)	TB(Week1)	TB(Week2)	TB(Week3)	TB(Week4)	Alb(Week1)	Alb(Week2)	Alb(Week3)	Alb(Week4)	Cr(Week1)	Cr(Week2)	Cr(Week3)	Cr(Week4)	Urea(Week1)	Urea(Week2)
1	A A	A G	G G	G G	141.66	2.15125	249.772	2.39754	92.4124	1.96573	145.162	2.16185	55	0	11	81.4886	92.6667	82.8571	98.6667	0.231714	0.264167	0.239857	0.283333	106.714	41.8333	27.4286	34.6667	169	34.1667	23.1429	26	19.4714	14	13.1571	11.3333	46.6286	38.6	25.4714	29.0667	32.7814	36.1433	32.8486	34.5633	82.1429	53.3333	61.1429	60.6667	10.6857	6.25
2	A A	A G	G G	G G	123.088	2.09022	76.1163	1.88148	94.7042	1.97637	91.3671	1.96079	31	0	8	103.714	106.143	98.5714	107	0.31	0.323286	0.298429	0.32575	186.714	31.1429	17.7143	16.75	225	20.2857	16	20.5	71.6286	30.2143	19.6286	15.425	168.643	64.0429	43.9714	36.175	40.8543	45.2371	42.8914	44.845	80.2857	78.1429	69.5714	68.75	9.88571	7.17143
4	A A	G G	G G	A G	36.42	1.56134	26.5562	1.42417					59	0	6	115.167	119.5	127.4	133.5	0.325667	0.34075	0.3658	0.377333	240	40	13	13.6667	1401	35	19	28.6667	12	22	9	6	52	45	24	20	47.8	38.5	42.5	43.0333	111	55	56	50	5.7	3.6
5	G G	G G	A A	A A	575.433	2.75999	274.5	2.43854	171.369	2.23393	143.96	2.15824	42	0	11	77	80.3333	79	80.5	0.227167	0.234833	0.229167	0.232	41.5	6	5	4.5	53.5	15	21	9.75	20.5	5	5	4.5	35.5	14	14	15	35.85	35.6	38	38.125	199	67	70	69	32.25	11.9
6	A A	A G	A G	G G	462.438	2.66505	161.373	2.20783	78.4	1.89432	93.9167	1.97274	43	0	9	115.286	89.8571	93.2	109	0.318571	0.242143	0.2662	0.305	113.143	27	26	32	127.857	25.1429	30.5	35.3333	74.6	65.9714	24.85	20.8667	107.886	92.4857	40.725	37.2667	34.7414	36.0729	39.9225	43.9	40.7143	39.2857	40.25	46	5.8	3.05714
8	A A	A G	G G	A G	276.972	2.44244	110.232	2.04231	110.428	2.04308	288.117	2.45957	57	1	5	105.6	104.6	92.2	114	0.305	0.2958	0.2574	0.314	384	47.8	56	38.5	734.6	26.8	48.4	24	21.12	4	2.72	3.15	43.46	9.58	7.66	8.775	44.284	43.398	46.95	47.5275	42.8	32.8	42	69.25	6.6	3.7
9	A A	A A	G G	A G	109.547	2.0396	90.25	1.95545	71.6458	1.85519	68.875	1.83806	28	0	7	121.286	116	113.333	116.75	0.352571	0.3435	0.331667	0.3475	394	123.333	58.6667	49.75	452.571	61	33	31.75	40.5143	14.7667	10.3667	8.8	87.6429	33.4667	22.1667	22.575	42.5843	43.0267	42.9033	41.99	54.4286	49.5	57	51.25	6.47143	5.15
10	A G	A A	G G	G G	513.433	2.71048	729.189	2.86284	835.12	2.92175	369.867	2.56805	61	0	6	84.5	88.4	80.6667	84	0.239667	0.2548	0.2375	0.24775	512	31.2	13.6	6.75	975.8	50.6	24.4	24.25	43.2	93	43	22.75	104.8	154.8	68.6	34.75	40.44	39.44	38.16	39.4	114.6	58.6	77	58.25	16.44	5.8
12	A G	A G	G G	G G	592.5	2.77269	341.675	2.53361	348.653	2.54239	211.654	2.32563	27	1	5	130.945	106	98	109	0.417	0.319833	0.295	0.3305	198.333	56.8	64.25	55	163.667	51	53.5	45.3333	56.6667	59	19	11	146	133.4	35.75	22.6667	38.3	38.64	37.925	37.2667	42	27.4	23.75	26.6667	4.36667	5.48
13	A G	A G	A G	A G	536.13	2.72927	219.24	2.34092	124.32	2.09454	103.425	2.01463	44	0	8	79.0714	85.8	88	99.5	0.240714	0.2572	0.250857	0.309	161.5	35.8571	40	56.6667	320.357	73.4286	78.8571	82	109.96	168.82	114.86	68.04	185.514	248.243	193.671	113.85	32.5857	32.4857	31.6	32.7667	90	53.6	42.1667	48.4	16.3	7.36
14	A A	A G	A G	A G	211.431	2.32517	62.949	1.79899	76.5771	1.8841	79.9517	1.90283	40	0	6	103	116.667	126.429	141.333	0.279	0.324667	0.360143	0.398333	147	36.5	47.2857	32	199.714	50.5	39.4286	29.3333	34.8714	25.4167	14.4286	11.2	49.2286	36.7167	25.0143	21.6333	36.5314	39.0333	41.9943	44.8	50.5714	56.6667	54.5714	59.3333	4.54286	2.48333
15	A A	A G	G G	G G			138.863	2.14258	84.985	1.92934	77.8195	1.89109	48	0	12	78.1667	73	74.3333	76.1667	0.218667	0.196167	0.200333	0.212	80.25	11.2	9	20.25	613	31.2	33	63	143.575	50.28	26.22	22.65	250.6	76.04	50.42	45.775	26.735	36.256	38.744	38.885	148	70.8	71	70	9.9	4.48
16	A G	A G	A G	G G	153.6	2.18639	83.6	1.92221	380.8	2.5807	350.4	2.54456	45	0	9	88	81.1667	92.25	103	0.25075	0.238667	0.27625	0.309	37	11	10	13	36	21.5	20	35	23	15	7	4.33333	69	34	15	14	36.3	34.9	42.1	41.8667	64	42	40	42.3333	5.7	2.3
17	A A	A A	A G	G G	260.775	2.41627	85.5	1.93197	90.63	1.95727	72.5553	1.86067	35	1	5	102.857	97.1667	90.6	101	0.316571	0.2985	0.2778	0.3158	214.857	130.167	116	109.2	315.571	98.5	108	90.2	17.2571	11.8667	20.8	24.84	21.5857	18.0667	25.42	31.3	41.6643	40.4033	33.742	36.104	39.4286	41.8333	45.2	45.8	4.48571	3.28333
18	A A	A A	G G	A G	119.793	2.07843	63.7544	1.80451	51.9169	1.71531	57.7251	1.76137	44	1	8	96.8571	92	86.6	88.6	0.277143	0.262857	0.242	0.2598	478.857	37.8571	33.1667	60	553.857	16.7143	30.8333	40.4	74.86	71.62	45.22	26.96	119.471	109.029	75.6833	55.32	38.2714	37.9143	40.1333	43.64	61.1429	50.8571	42.4	44.4	9.27143	6.48571
20	A G	A A	G G	G G	947.25	2.97646	206.9	2.31576	210	2.32222	272.5	2.43537	48	0	5	75	81.4	92.5	124	0.227286	0.248	0.2855		201.286	45.2	18	12	158.143	31.6	11	13	4.75714	5.44	4.5	3.1	11.3714	14.92	13.95	8.5	39.2486	39.066	41.715	46.9	76	58.4	62.5	72	9.77143	5.84
21	A A	A G	A G	A G	50.5192	1.70346			39.3381	1.59481			42	0	8	96.7143	99.5714	93	93.1429	0.269	0.283714	0.269429	0.266571	253.571	68	64.5714	48.1429	223.857	39.4286	36	25.5714	182.686	83.5857	41.2286	25.6714	197.8	91.7714	50.2429	33	35.6786	35.1086	35.2743	37.43	106.857	109	73.1429	81	13.7	13.3
22	A G	A G	A G	A G	198.501	2.29776	123.605	2.09204	158.696	2.20057	186.455	2.27057	38	0	6	123.167	122.4	124.2	129.5	0.342	0.343	0.3536	0.3625	211.333	40.8	24	39.5	246.333	29.6	21.2	48.5	33.15	9	7.2	10.15	65.2667	22.68	19.04	29.35	36.62	35.528	38.27	40.67	59.8333	50.2	55.4	59	5.71667	2.66
23	A A	A G	A G	A G	90.6487	1.95736	56.2247	1.74993	67.9575	1.83224	65.0533	1.81327	50	0	6	128.571	127.167	129.333	135.5	0.360429	0.348833	0.356	0.3755	167	28	15.3333	9.5	258.5	23.5	20.6667	12	18.7	6.425	5.66667	5.25	39.425	13.7	14.3333	13.5	36.6625	38.08	41.7967	44.965	54	47	50.6667	65.5	4.575	3.5
24	A G	A A	G G	A A	119.056	2.07575	116.721	2.06715	118.078	2.07217	215.745	2.33394	56	0	9	121.8	120	132.5	134	0.3535	0.35275	0.395	0.387	318	116.25	56	29.5	512	39.25	18	14.5	73	14.5	8	7.15	205	28.5	19	18.8	38.8	39.325	43	44.3	67	51.25	64	57.5	5	4.45
25	A G	G G	A G	G G	142.583	2.15407	112.756	2.05214	68.8333	1.8378	85.55	1.93222	58	0	11	92.4286	100	101	110	0.259571	0.2755	0.273333	0.315	62.4286	16	13.3333	15	129.429	21.25	28.6667	21	33.1571	10.525	7.06667	6	54.6286	20.4	14.8333	14.1	32.1629	37.835	43.2967	43.42	83.4286	57.25	60.6667	67	7.6	4.45
26	A G	A G	G G	A G	55.3	1.74273	159.319	2.20227	92.3577	1.96547	123.53	2.09177	38	0	10	76.5714	81.5714	85.2	93.6667	0.765714	0.815714	0.852	0.936667	43.3333	19	25.5		113.667	39	38.5		99.3333	134	64		129.667	209.9	93		38.1	40.18	36.55		593.5	187.8	67		39.8525	31.87
27	A G	A A	A A	A G			297.16	2.47299	250.47	2.39876	364.32	2.56148	55	0	8	69.6429	72.5714	82.7143	86.8571	0.199857	0.215286	0.251429	0.262857	446.857	28.1429	24.4286	27.5714	594.571	50	44.1429	39	38.5286	72.9571	30.8	11.1429	52.0571	97.8857	50.4429	18.3	27.6529	30.5329	31.9843	34.0243	277.429	143.857	94.2857	78	23.5286	21.4
28	A G	A A	G G	A A	926.683	2.96693	85.0258	1.92955	85.7574	1.93327	113.547	2.05518	48	0	11	108.167	94	109.167	115.25	0.299333	0.259	0.308333	0.3165	135	116.2	242.6	117.5	208	100.4	138.4	59.75	49.0333	21.18	14.78	14.575	93.1333	43.3	32.92	29.85	34.3617	36.63	39.85	38.6575	132.333	79.6	73.4	73.75	21.0667	7.72
29	A A	A G	G G	A G	266.8	2.42619	128.8	2.10992	155.94	2.19296	147.2	2.16791	63	0	9	109.571	93.5714	79.4	80	0.312429	0.268429	0.231	0.151333	96.1429	37.1429	35.6	58.6667	118	82	36.6	55.3333	30.1714	14	6.44	4.7	57.1857	29.2429	14.88	11.7667	33.4543	33.5943	31.448	32.36	170.143	87.4286	67	66	19.1857	11.7
31	A A	A A	A G	A G	124.564	2.09539	50.3684	1.70216	53.2685	1.72647	36.1929	1.55862	48	0	6	78.8333	90.3333	104.5		0.224833	0.269667	0.3065		89	21	18		23	29	30		10	6	5		23	14	12.5		36	37.3	39.875		49	42	46.75		4.3	2.4
32	A G	A A	A G	A G	116.875	2.06772			72.9167	1.86283	36.875	1.56673	59	1	6	78.1429	79	86.1429	101.25	0.219857	0.227571	0.258	0.30825	215.857	19.2857	19.1429	27.5	85.5714	22.5714	26	31.25	27.6	3.31429	3.17143	4.125	47.0429	10.8	11.1571	16	36.0786	38.2729	38.5786	45.7125	73.2857	35.8571	34	43.25	5.6	4.72857
33	A A	A G	G G	G G	742.837	2.87089	145.541	2.16298	480.345	2.68155	180.536	2.25656	34	0	12	99.7143	86.5714	76.5714	76.4	0.267286	0.241429	0.213571	0.217	250.429	28.4286	22.2857	14	322.857	22.7143	29.1429	17.4	174.6	49.0857	30.6143	30.28	196.157	59.2714	42.5857	48.02	36.7114	35.6586	37.5229	46.388	95.1429	61.1429	71.7143	93.4	17.1	7.7
34	A G	A G	A G	G G	275.147	2.43956	116.116	2.06489	87.78	1.9434	130.387	2.11523	44	0	5	102	107.4	119.667	120.333	0.285286	0.3012	0.337	0.341333	187.875	24	20	8.5	314.5	20.8	21.6667	15.5	16.0125	4.68	4.3	3.35	39.45	10.58	10.3333	7.4	41.71	40.878	43.9267	36.215	61.5	53.4	55.3333	51.5	6.6375	3.18
35	A G	A A	A G	G G	124.523	2.09525	100.894	2.00387	41.3456	1.61643	82.9733	1.91894	50	0	9	95.1429	113.429	114	115	0.265571	0.312286	0.312	0.3215	268.143	52.7143	24.6667	30.5	316.429	26.8571	24	24	19.6857	8.2	7.23333	5.35	46.4	24.1429	21.7333	16.75	39.54	39.5914	39.3233	40.93	55.1429	52.5714	58	63.5	8.32857	4.71429
36	G G	A G	G G	G G	218.4	2.33925	646.1	2.8103	338.596	2.52968	1060.15	3.02537	24	1	8	79.7	76.3333	49	59	0.2282	0.220333	0.137333	0.167833		264.1	75.5	32.2		359.4	100.833	70		107.3	132.333	146.6		174.7	199.167	213		32.32	36.45	31.32		49.5	30.5	26		6.68
37	A A	A G	G G	G G					101.625	2.007	123.083	2.0902	52	0	5	105.429	93.4286	92.3333	102	0.303286	0.273143	0.273167	0.301	204.143	23	40.1429	24.4	222.429	28.4286	56.7143	19.6	32.3	20.8286	34.3	14.26	74.7714	42.5143	57.2714	30.12	39.2029	38.29	40.8543	33.362	66.4286	46.5714	44.1429	48.6	10.7143	4
38	A A	A A	A G	G G	319.605	2.50461	85.1899	1.93039	81.0333	1.90866	72.4778	1.8602	58	0	5	93.4286	94	96.75	103.667	0.27	0.2722	0.2795	0.302667	153.714	23.8	22	27.5	268.143	31.2	31.5	44.75	28.6857	8.18	6.775	6.5	50.3714	14.28	14.1	14.15	35.2029	37.264	40.2	42.0175	64.5714	55.8	54.75	71.75	7.38571	5.42
40	G G	A G	A G	A G	283.078	2.45191	138.7	2.14208	74.825	1.87405			44	0	9	70	89	89.6		0.233	0.256667	0.2548		145.2	25.75	13.75		104.8	14	14		23.06	7.25	6.75		48.88	16.075	18.8		28.938	35.045	46.8025		39.8	45	56		4.52	2.75
41	G G	A A	A G	G G	123.289	2.09092	375.429	2.57453	171.428	2.23408	122.843	2.08935	46	0	11	76.1429	85.8333	101.667	106.5	0.218571	0.252833	0.304833	0.316833	278.429	89.1429	164.857	90.1667	309.714	58.2857	70.8571	39.8333	33.3571	29.1143	12.2429	8.46667	54.3571	44.1429	22.7857	17.0833	43.1757	38.4871	41.2429	41.2017	97.1429	53.5714	55.5714	51	16.3886	11.2429
42	A A	A G	A A	G G	210.32	2.32288	193.6	2.28691	242	2.38382	165	2.21748	45	0	5	71.1667	72	98.5	130	0.2025	0.212	0.29	0	289.5	58	31	22	172	46.6667	80.5	26	54.1	13.3333	7	8.1	85.25	29	33.5	20.7	38.85	36.1667	39.85	47.2	73	59.6667	55.5	82	6.635	1.83333
43	A A	A A	A G	A G	149.915	2.17584	261.538	2.41753	187.274	2.27248	233.208	2.36774	40	0	7	89.5	98.4286	98.4	102.4	0.25	0.276	0.2748	0.2894	150.4	43.5	24.25	27.25	419.2	84	35.5	25.75	20.64	11.55	8.975	6.775	45.86	25.625	19.55	16.725	35.712	41.7875	37.7925	40.835	65.4	50.25	49.75	49.25	8.64	5.475
44	A A	A A	A G	A G	227.687	2.35734	193.706	2.28714	253.371	2.40376	87.776	1.94338	42	0	8	107.833	109	97.3333	103.8	0.314	0.320167	0.29	0.3104	150	152	164	318.4	114	78	81	152	36	55	88	64	72.3333	89	118	87.8	39.3333	41.1	38.9	40.72	54.6667	46	46	43.25	7.3	5.3
45	G G	A A	A G	A G	177.5	2.2492	71.8	1.85612	46.05	1.66323	71.6518	1.85523	49	0	7	85	75.1667	94.5	95.5	0.246	0.219167	0.277	0.28125	213.8	31.4	18.6	21	340	95.8	48.4	32	63.4	25.4	19.4	16.275	133.4	45	38.8	27.825	43.4	40.36	46.08	44.7125	52.4	41.4	57.2	68	5.72	3.46
48	A A	A A	A G	G G			123.975	2.09333	90.8438	1.9583	58.2667	1.76542	45	0	5	74.4286	88.3333	69.8	66	0.21	0.259	0.2044	0.192	118.714	43	10.2	7	204.286	76.1667	10.6	9.33333	8.97143	8.05	4.38	3.36667	18.1429	15.3	9.72	8.43333	31.3929	36.165	32.916	35.1667	235.571	134.667	112.8	112	27.4743	11.3167
50	A A	A A	G G	G G	193.162	2.28592	107	2.02938	148.31	2.17117	155.364	2.19135	36	0	5	105.286	102.286	109.667	111	0.290571	0.288571	0.313	0.3195	308.714	56.1429	20	23	387	30.5714	19.3333	22	9.38571	5.35714	4.03333	3.5	20.5286	12.0143	10.65	10.3	39.6586	41.3471	45.0683	44.685	55.7143	49	52.3333	54	5.14286	4.71429
51	A A	A G	G G	A G	172.48	2.23674	64.68	1.81077	47.6933	1.67846	60.4333	1.78128	54	0	5	95	110.4	102.5		0.265286	0.3018	0.28275		130.286	20.4	42.25		52.2857	38.6	45.25		16.9286	5.34	5.825		32.6571	13.54	13.85		37.6314	40.998	40.03		55	48.4	50		7.25714	4.76
52	A A	A G	A A	A G	345.53	2.53849	167.587	2.22424	145.82	2.16382	97.0812	1.98714	55	0	11	98.5	81.8571	71.3333	68.5	0.287	0.237429	0.203	0.19375	41.1429	9.14286	5.33333	3	267	75.2857	43.6667	16.6667	85.5571	29.1714	13.9	9.33333	122.929	41.9071	21.8667	16.6667	32.9114	34.6071	34.07	34.0833	232.429	104.214	98	97.6667	29.9714	14.5857
54	A G	A A	A G	A G	343.333	2.53572	295.895	2.47114	150.239	2.17678	140.563	2.14787	49	1	5	78.3571	83.2857	101.5	118.667	0.216571	0.238286	0.29	0.335667	559.214	126.143	27.25	17	666.143	58.7143	17.25	17.5	35.0929	23.6286	10.225	7.25	67.8714	45.8143	21.95	17.825	39.5329	36.3486	37.485	39.89	46.1429	37	41	53.25	6.79857	2.54286
55	A G	A G	G G	A G	462.381	2.665	127.152	2.10432	179.626	2.25437	231.42	2.3644	42	0	6	79.1667	79.8	83.5	92	0.240667	0.2438	0.25425	0.278	56	39		20	86	34.5		129	13	9		4	29	20.5		13	36.5	39.25		46.8	54	52		60	3	3.05
56	A G	A A	G G	G G	111.689	2.04801	117.81	2.07118	631.785	2.80057	998.844	2.9995	40	0	7	133.5	130.8	117.875	127.8	0.383833	0.3724	0.3385	0.3572	157.25	144	106.5	79	85.25	72.5	56.25	33.2	48.7	21.0833	10.65	9.96	105.325	47.4667	24.45	23.7	35.705	37.815	35.1275	40.322	58.75	60	50.5	50.8	7	3.68333
57	A A	A G	G G	A G			94.9679	1.97758	91.296	1.96045	98.7983	1.99475	48	0	5	113.286	103.5	96.6667	94	0.334	0.309333	0.285167	0.2758	335.476	38.6667	19.6667	14.8	386.904	30.8333	19	19.2	32.9857	14.2667	8.33333	5.58	80.7	34.9667	19.6	13.84	37.0229	38.4933	39.6517	36.71	65.7857	50	55.1667	48.2	12.4786	10.8417
58	A G	G G	A G	G G	270.219	2.43172	120.859	2.08228	84.6384	1.92757	59.4028	1.77381	49	1	8	101.5	87	93.25	97	0.2935	0.258667	0.275	0.261	42.5	125	74.5	30.5	26.5	216.333	87	41.5	10	10.6667	9.25	6	57	23.3333	22.5	15.5	39.35	37.5333	42	44.05	64.5	53.3333	47.5	44	8.1	3.76667
59	G G	A G	A G	A G	124.32	2.09454			60.125	1.77906	59.2	1.77232	43	0	5	91.5			124.25	0.2595			0.35875	190			13.3333	260.5			19.3333	23.15			6.96667	85.1375			17.5333	39.2625			45.9567	86.25			89.3333	5.7375
60	A A	A A	A G	G G	170.4	2.23147	219.153	2.34075	154.78	2.18972	156.2	2.19368	50	0	12	104.357	111.143	93.4286	81.6429	0.286571	0.294429	0.263	0.234571	104.143	34.7143	54.7143	22.1429	239.429	50.4286	52.4286	24.8571	142.529	92.4143	43.6	24.6	278.986	169.871	86.7	49.6714	43.8757	41.22	38.9729	35.3843	162.286	89.5714	54	60.7143	29.4286	19
61	A A	A A	A G	A G	34.2896	1.53516	51.5414	1.71216	60.4291	1.78125	38.5692	1.58624	43	1	9	95.1429	88.4286	87.25	93.5	0.269714	0.252714	0.25025	0.269	226.857	42.4286	10.5	9.5	569.571	77.7143	10	12	60.3714	17.5429	6.925	5.1	85.9714	27.3143	13.25	11.95	35.7243	32.4457	32.86	32.655	121.429	59.5714	66.5	50	14.9143	7.95714
62	A G	A A	G G	A G	206.067	2.31401	275.971	2.44086	698	2.84386	1560	3.19312	59	0	6	93.5714	83	78.6667	88	0.269429	0.244	0.231667	0.2695	90.1429	25.5714	17	14.5	124.571	32.5714	19.6667	16	6.57143	2.75714	2	2.225	17.2857	9.68572	7.36667	8.225	37.1429	36.7557	37.7433	39.325	96.1429	79.8571	85.6667	84.25	9.74286	5.14286
63	A G	A A	G G	G G	553.5	2.74312	93.9095	1.97271	135.04	2.13046	216.372	2.3352	54	0	5	133.429	108.5	77	91.3333	0.384857	0.304667	0.217	0.271	260.571	27.3333	15.6667	11.3333	287.714	21.5	16.1667	14.8333	30.5857	10.7667	10.8	11.3833	60.1	28.85	30.5833	31.3167	40.6129	37.73	38.1867	40.7883	65.2857	49.5	53	57.8333	5.87143	4.28333
64	A A	A G	G G	A G	111.673	2.04795	124.7	2.09587	169.192	2.22838	191.7	2.28262	55	0	7	97	88.5714	103.667	113.75	0.263286	0.250429	0.2975	0.31975	325.429	38.8571	40.6667	34.25	303.857	28.8571	28.3333	26.5	91.0143	40.4143	25.0167	16.3	98.9143	46.1571	26.6667	19.925	38.7714	36.9214	38.9533	37.3175	140.429	70.7143	55.1667	51.5	21.3286	5.44286
65	A G	A A	G G	G G	256.786	2.40957	165.186	2.21797	177.044	2.24808	227.437	2.35686	61	1	9	68.2857	76.1429	92.25	100.75	0.194857	0.224286	0.265	0.294	152.571	16.1429	21.5	185.4	104.143	14.7143	35.5	241.8	41.8571	12.7857	9.725	12.94	74	25.0571	19.9	24.18	36.3729	36.6029	38.6275	39.842	112.714	85.2857	52.75	78.8	16.6429	17.8429
66	A G	A A	A G	G G	517.24	2.71369	146.469	2.16575	125.793	2.09965	120.6	2.08135	55	0	5	121.857	113.571	104.833	100.25	0.355286	0.336	0.307667	0.29875	245.714	44.5714	47.5	37.25	249.286	46.2857	52	29	14.3143	3.8	2.41667	1.625	27.7286	10.6857	8.01667	5.525	40.21	37.4986	38.21	38.215	54.4286	53.7143	45.8333	50	5.98571	4.57143
67	A G	A G	A G	A G	76.6125	1.8843	58.2991	1.76566	56.7422	1.75391	55.2656	1.74246	55	0	5	90.8571	90.5714	97.5	111	0.256571	0.258429	0.284333	0.3245	249.571	53.1429	28.3333	17.5	395	90.2857	47.5	22.5	12.5714	4.8	3.95	5.15	23.4857	10.1	9.36667	12.8	35.7429	36.6	40.6433	43.305	62	52.7143	49	60.5	8.14286	4.18571
69	A G	A A	A A	G G	126.16	2.10092	90.2171	1.95529	154.538	2.18904	75.115	1.87573	61	1	9	119.143	126	101.583	101	0.317143	0.333429	0.274333	0.2685	218.857	82.1429	47.8571	53.25	167	31.8571	21.1429	36.25	84.9429	50.8286	34.8857	28.575	94.6143	58.3143	38.3286	29.925	36.8729	41.4157	36.3943	38.59	50.7143	45.5714	43.8571	38.75	6.7	5
70	A A	A A	G G	G G	215.587	2.33362	133.101	2.12418	126.428	2.10184	134.637	2.12916	46	1	5	94.1429	83.6667	94.5	88.25	0.259857	0.230333	0.265	0.239	358.286	42.5	20	24.25	393.429	25.8333	20	36.5	30.4571	6.03333	3.8	3.3	40.3429	10.9333	8.76667	8.25	41.7957	39.11	40.57	39.425	85.2857	63	70.3333	67	11	4.03333
71	A A	A A	G G	G G	359.181	2.55531	136.981	2.13666	113.625	2.05547	90.3108	1.95574	49	1	9	115	100.4	82.25	85	0.3184	0.2722	0.228	0.23225	126.2	10.4	11.2	15.5	340.2	24.4	30.2	37.5	83.44	51.14	25.44	25.55	145.2	88.18	45.1	38.875	34.318	34.688	35.622	42.5775	75	49	38.6	59	11.02	3.56
72	A G	A A	G G	G G	460.02	2.66278	456.535	2.65947	734.948	2.86626			50	0	9	105.5	76.4	73.3333	88	0.286833	0.2078	0.204333	0.248	118.667	27	88.3333	109.2	101.667	35.5	91	116.4	85.4	107.225	91.6333	54.18	138.433	179.025	157.867	97.34	36.8667	30.6525	33.19	30.136	153.333	84.75	61.3333	45.6	23.7867	12.6
73	A G	A G	A G	G G	82.8733	1.91841	67.9933	1.83247	74.1417	1.87006	135.78	2.13284	51	0	5	119.714	115.857	117	117.571	0.327	0.311143	0.318	0.327143	388.643	51.1429	36	68.2857	490.357	24.8571	26.3333	48	48.4143	11.9286	12.7333	58.3857	74.7929	23.4143	23.8	84.9714	35.6129	37.0271	40.3067	41.0786	62.7143	56.2857	59.3333	54	9	4.97143
74	A A	A A	G G	G G	449.008	2.65225	104.581	2.01945	157.986	2.19862	368.723	2.5667	33	0	6	94.1667	88.8	76.6667	82.6667	0.2755	0.2536	0.219333	0.238333	411.667	96.2	34	17.6667	569.333	49.8	29.3333	24.6667	18.6	8.64	3.86667	4.73333	36.15	22.92	13.0667	13.7333	44.9167	39.886	37.28	35.18	80.1667	59.2	57.6667	62	10.3333	6.44
75	A A	A A	G G	A G	623.142	2.79459	146.705	2.16644	104.657	2.01977	117.475	2.06995	45	0	8	112.714	99.3333	100.8	102.5	0.331286	0.2985	0.2965	0.304	357.5	17	14	10.5	364	44	32	20.5	51	17	6	6	136.5	26	15.3333	14.5	37.35	37.4	34.2667	33.8	59	39	41	47.5	6.2	5
76	A A	A A	G G	G G	324.692	2.51147	185.827	2.26911	112.927	2.0528	110.918	2.045	48	0	8	88.8333	80.3333	82.2	92	0.245167	0.224833	0.2288	0.2785	152.5	19	5.83333	5	174.25	13	11.1667	8	13.275	6.225	4.18333	3.25	26.1	12.5	8.95	8.75	35.9475	39.595	40.2917	39.72	62.75	44	45.6667	42	10.9175	5.175
77	A A	A A	G G	A G	79.9779	1.90297	60.9	1.78462	66.3778	1.82202	68.3111	1.83449	48	0	5	123.286	125.75	125	121	0.337143	0.34275	0.3355	0.331	108.286	49.25	49	55	112	42.25	26.3333	36	15.9286	6.675	8.43333	8	25.1214	14.1	15.9667	16.6	40.7686	40.9325	43.6367	42.55	47.5	49.75	61.3333	50	6.36143	5.8
79	A A	A G	G G	G G	516.562	2.71312	245.7	2.39041	132.911	2.12356	151.875	2.18149	45	0	5	96.5714	87.7143	103.857	120.667	0.276	0.253286	0.302	0.351667	281.857	214.429	94.2857	42.6667	398.857	98.8571	36.1429	25.6667	26.9857	7.85714	5.71429	3.76667	42.0857	15.1143	12.9429	11.2667	36.7757	37.9414	41.7486	43.0767	75.2857	56.8571	60.4286	62.6667	6.35714	4.35714
80	G G	A A	G G	A G	227.186	2.35638	73.3833	1.8656	99.456	1.99763			50	1	9	110.429	96.5	89	88.5	0.323	0.283667	0.2618	0.26	144.571	27.5	11.2	11	151.429	29.1667	12.4	13	14.6714	4.56667	5.72	5.35	35.7143	13.8333	16.74	15.8	35.1771	38.585	39.126	39.8	60	48.1667	47.2	54.5	6.32857	3.43333
82	A A	A A	A G	G G	221.301	2.34498	140.951	2.14907	298.887	2.47551	262.305	2.41881	35	0	5	98	83	79.2	118	0.268714	0.230667	0.2248	0.332	199.857	31.3333	13	10	138	18	21	15.5	47.1286	13.1667	9.96	9.05	56.3	19.6333	16.58	15.05	43.4329	41.56	41.812	44.015	54.4286	41.1667	52.8	57	6.75714	5.06667
83	A A	A A	G G	A G	225.903	2.35392	284.336	2.45383	387.35	2.5881	89.975	1.95412	50	0	5	128	110	108.333	111	0.361333	0.3134	0.313667	0.323	233	86	59.3333	57	292.667	48.4	43.6667	32.5	8.31667	11.6	6.5	4.8	22.125	24.7	16.8	14.3	40.87	36.546	37.8433	41.7	44.9167	40.6	40.6667	49	6.35833	3.28
86	G G	A A	G G	G G	436.76	2.64024	204.963	2.31167	196.024	2.29231	355.371	2.55068	49	0	6	127.857	103.667	96	109	0.366286	0.294	0.271333	0.205333	165.571	16	17	113	216.286	18.1429	24.3333	86.3333	36.2429	7.68571	7.53333	9.2	69.3714	17.3286	18.2333	23.2333	35.8929	38.85	38.61	43.49	62.2857	51.1429	43	51.6667	11	7.61429
87	A A	A G	A G	G G	308.75	2.48961	122.85	2.08938	104.542	2.01929	136.5	2.13513	49	0	5	106.286	110.4	106.5	117	0.320286	0.3324	0.316833	0.346	168.143	53	34.8333	25.6	243.286	24.6	29	18.8	17.9571	7.16	4.95	2.42	49.2143	21.12	14.6333	9.66	40.7271	40.952	37.2067	38.348	56.8571	61.4	56.3333	55.2	7.01429	4.42
88	G G	A A	A G	G G	387.8	2.58861	151.2	2.17955	91.464	1.96125			55	0	6	75.5714	67.2857	72	84.4286	0.207	0.189571	0.203143	0.238714	194.714	39	28.5714	49.7143	340.143	34.4286	41.4286	46.8571	48.6286	18.4286	8.41429	11.3857	68.3143	30.2	15.4286	21.1286	31.7786	33.9286	32.4686	35.9771	362.857	132.286	87	69.4286	30.1571	23.4571
90	A A	A A	G G	G G	175.333	2.24386	74.1263	1.86997	57.835	1.76219	210.888	2.32405	46	0	6	115.4	116	111.6	109	0.315	0.3128	0.3028	0.3	112.143	84.6	58	50.5	139.143	42.8	34	38	66.7	58.76	37.84	21.975	98.4429	92.44	59.72	35.75	39.6629	46.12	44.686	41.8725	52.5714	49.8	48.8	53.25	7.84286	5.04
91	A G	A G	A G	G G	194.596	2.28913	86.1816	1.93541	52.9467	1.72384			54	0	5	80	88.4	100.8	102.5	0.228667	0.2576	0.2992	0.305	46	19	21		63	30.5	26		99	104.75	40		145.5	162	61		36.2	40.025	42.3		63.5	54.75	56		6.4	2.25
92	A G	A A	A G	G G	454.155	2.6572	260.622	2.41601	200.964	2.30312	172.255	2.23617	53	0	5	111.167	90.1667	106.5	102.667	0.318667	0.259	0.3045	0.281	253.8	17.4	17.5	16.3333	527.6	18	21	19	43.3	24	11.5	7.33333	76.22	43	24	17.3333	42.6	42.88	48.05	44.5	57.4	46.6	48	58.6667	7.52	3.42
93	A G	A G	A G	G G	461.799	2.66445	168.062	2.22547	109.119	2.0379	60.7001	1.78319	59	0	5	97.7143	97.3333	101.833	106.571	0.274286	0.277667	0.295167	0.311286	189	42.6667	47	65.7143	233.286	42.8333	63.8333	82	35.8286	9.88333	5.15	3.8	57.0714	18.9833	11.3167	9.24286	38.6457	34.78	33.5067	36.59	94.1429	73.5	67.8333	65.7143	9.25714	5.78333
94	A A	A A	G G	A G	90.9267	1.95869	99.9452	1.99976	82.5258	1.91659	81.834	1.91293	39	0	8	89	93	99.3333	111.333	0.260143	0.278	0.3015	0.341333	166.857	36.2	27.6667	28.3333	158	21.4	36.6667	29.3333	12.2714	5.28	3.66667	2.93333	31.2429	16.38	11.6667	10.4667	38.1843	39.97	38.2567	37.9733	49.5714	54.4	59.1667	65.6667	6.87143	3.7
95	A A	G G	G G	G G	676.752	2.83043	328.568	2.51663	126.687	2.10273	315.695	2.49927	56	0	5	101.571	100.143	88.6	81	0.287143	0.285714	0.2544	0.2304	532.571	71.2857	46.8	90.6	985.286	44.7143	45	73	30.4286	9.42857	5.82	3.86	66.1	22.8429	14.12	11.7	38.7786	38.7014	38.194	37.418	79.7143	58	56.4	50.8	8.28571	3.31429
96	A A	A A	G G	A G	502.75	2.70135	236.8	2.37438	132	2.12057	114	2.0569	61	0	6	98.2857	103.429	106.5	118	0.287857	0.302571	0.31925	0.351	363.286	45	14.25	13	143.286	25.1429	14	14	29.8286	11.2143	5.625	4.5	69.9714	29.9143	15.775	15.3	41.1643	39.6271	39.7575	40.87	62.1429	53.7143	53.75	63	6	4.11429
97	A G	A A	A G	G G	121.6	2.08493	67.4649	1.82908	52	1.716	101.183	2.00511	48	0	10	89.1429	100.667	101.667	123.5	0.257143	0.29	0.300667	0.3745	241.429	129.333	96.6667	373.667	204.429	64.6667	92	324	45.275	22.88	17.6	50.1667	116.057	48.05	37.8333	83.2	34.7286	37.85	40.1333	40	84.2857	62.1667	57.6667	56.3333	12.8714	7.36667
99	A G	A A	G G	A A	378.568	2.57814	104.377	2.0186	158.395	2.19974	138.513	2.14149	52	0	5	133.857	121.286	119.833	130	0.358571	0.341857	0.341333	0.3725	264.571	270	135.333	51	253.286	172.857	63.6667	31.5	26.4857	10.8429	7.3	7.1	42.6857	17.1857	13.8833	14.35	44.7957	41.4429	42.0267	44.84	67.1429	52.2857	51.6667	60.5	10.0857	4.04286
100	A A	A G	G G	A A	211.393	2.32509	144.224	2.15904	98.7836	1.99468	73.3512	1.86541	40	0	5	79.7143	97.2857	112.333	124	0.214714	0.265	0.309	0.345	243.571	85.4286	31.6667	55	206.714	58.8571	26.6667	38.5	51.6857	16.3143	8.13333	7.2	77.3286	29.4571	15.5667	15.85	38.4386	42.6329	44.4633	45.835	59.1429	39.4286	35.3333	39.5	6.08571	4.87143
101	A A	A A	A G	G G	211.313	2.32493	109.363	2.03887	57.7075	1.76123	64.8388	1.81184	55	0	8	113.429	66.4	79.75	98.3333	0.311571	0.182	0.218	0.272667	273.429	187.2	63.25	30.3333	268	122.8	32.5	50.3333	64.6	26.68	19.95	16.3667	103.643	44.7	38.275	31.2333	38.1214	36.116	41.2375	40.6233	72.5714	57	63.25	58	9.92857	4.98
104	A G	G G	A G	G G	296.752	2.47239	288.486	2.46012	615.038	2.7889	297	2.47276	55	0	8	71.6667	78.6667	81.5	99	0.209667	0.236	0.249	0.3055		85		22		43		25		10.5		3		23		9		38.45		42.7		85		58		9.05
105	A A	A A	A G	A G	269.517	2.43059	99.7812	1.99905	210.292	2.32282	80.5689	1.90617	40	0	7	104.6	90.8333	84.3333	94	0.329	0.2892	0.277333	0.303		27	39	16		108	123	24.3333		109.5	46.3333	28.6667		168	68.6667	40.3333		34.35	39.2	40.9		39	44.3333	38.6667		5.3
106	A A	A G	G G	G G	360.736	2.55719	283.608	2.45272	184.803	2.26671	130.51	2.11564	43	0	9	86.8571	85.1429	90.8571	92	0.246286	0.246857	0.267286	0.277714	89.7143	14.4286	9	12	153.571	32.2857	23	25.5714	35.8	11.2	6.71429	8.37143	52.9714	21.0286	16	18.5	36.3329	38.1257	41.1957	36.7943	45.2857	49.1429	48.4286	37.5714	5.24286	4.75714
107	A A	A A	A G	A G	108.875	2.03693	105.413	2.0229	71.4667	1.8541	78.1667	1.89302	56	0	8	89	88.1667	99.5	113.4	0.25275	0.257167	0.2935	0.3308	693	29.5	34.5	21.4	1331	56.5	43.3333	27	160	29	22	18.6	305	45.6667	36	31.2	33.5	37.7333	38.15	39.66	63	37.1667	41	51.2	5.1	2.4
108	A G	A G	G G	A G	645.6	2.80996	236.6	2.37401	133.92	2.12685	151	2.17898	61	1	11	76.8883	86	92.8333	103.333	0.217667	0.2445	0.272833	0.304333	387.833	51.5	12.5	8.66667	575.5	27	18	16.6667	77.15	28.0833	15.3833	11.6667	90.1333	35.1	19.7167	16.1667	36.5017	36.28	38.5633	39.6033	127.167	92	54.6667	50.3333	16.8333	9.36667
109	A A	A A	A G	A G	83.125	1.91973	80.6531	1.90662	63.525	1.80294	67.2	1.82737	21	0	5	126.2	126.667	126	126.8	0.3614	0.368833	0.370667	0.3744	100	37.25	28.5	52.5	54	28.5	48.5	61.25	16	8	5	6.25	35	20	17.5	20.5	43.3	44.325	43.1	45.5	65	65.5	59	66.25	2.8	3.8
111	A A	G G	G G	A G	325.2	2.51215	102.333	2.01002	115.607	2.06298	135	2.13033	52	0	8	94.5	95.05	92.25	90	0.272143	0.2765	0.2695	0.266	83.1667	34.6667	70.6667	43	99.5	54	65	35	21.85	9.26667	5.33333	4.2	53.6333	23.8667	18.8	12.9	33.2167	36.4667	37.3333	37.8	41.3333	41.6667	48.3333	51	2.8	1.96667
114	A G	A G	A A	A G	146.016	2.1644	103.3	2.0141	32.3224	1.5095	45.92	1.662	41	0	7	114.429	113.143	119.429	117.167	0.332571	0.334429	0.356857	0.336333	132.286	131.714	87	46	211.429	162.286	43.4286	19.8333	195.643	103.943	52.6429	33.0167	233.743	113.229	62.3714	42.65	36.7271	35.0971	42.2457	41.975	67.4286	68.8571	55.1429	61.5	8.18572	8.77143
116	A A	A A	A G	G G	118	2.07188	184.829	2.26677	163.924	2.21464	95.2889	1.97904	41	0	5	98.6571	105.34			0.288571	0.3124			317	43.3333	14.6667	9.66667	401.857	25.8333	16.3333	20.6667	17.48	8.25	6.25	5	34.4571	16.7833	17.6667	16	34.2	32.0667	39.0667	41.9333	50	59.6667	61.3333	53.3333	3.61429	3.25
117	A A	A A	A G	G G	157.188	2.19642	59.9528	1.77781	82.7028	1.91752	53.0665	1.72482	20	1	5	107	119.667	125.667	109.4	0.3232	0.358333	0.365667	0.3126	95	28	24	30.75	167.667	33	27.5	27.25	12.1167	8.6	4.45	2.825	30.2667	22.55	13.05	8.8	40.62	38.2725	40.5625	37.0475	53.6667	42.5	44.5	35.25	8.31667	3.875
119	A G	A A	A G	G G	131.555	2.11911	58.2112	1.76501	79.8875	1.90248	66.4	1.82217	47	0	5	121.429	116.25	120.8	131.85	0.339	0.32025	0.3438	0.352	437.857	52.5	18.6	26.5	547.286	29.75	17	24	21.1143	11.8	7.06	6.35	29.0286	16.55	11.36	11.9	38.4143	37.9125	42.272	46.49	93.7143	63.75	78	95	7.28571	3.575
120	A G	G G	G G	A G	243.078	2.38575	173.565	2.23946			99.75	1.99891	62	0	5	103.429	89.8571	91.1429	98	0.295714	0.251286	0.261714	0.300571	291.786	42.2857	37.2857	46.1429	345.571	73.5	46	52.5714	23.7714	8.94286	4.77143	3.45714	33.5643	14.4286	9.14286	8.2	37.3486	40.4143	39.47	42.2143	67.5714	77.5	121.429	88.7143	9.82143	11.3
121	A G	A A	G G	G G	1178.85	3.07146	240.178	2.38053	835.2	2.92179	291.45	2.46456	45	0	5	106.857	95.8714	96.0143	112.32	0.307143	0.285429	0.301857	0.3484	109.857	72.4286	17.5714	20	119.571	63.1429	24	29.2	9.45714	9.07143	6.98571	4.74	16.6714	15.2714	12.8429	8.98	38.4171	35.4886	42.8371	39.55	53.1429	60.0714	54.1429	49	4.21429	6.07286
122	A A	A G	A G	G G	351.05	2.54537	74.6551	1.87306	66.8667	1.82521	73.6715	1.8673	49	0	9	90.5714	98.7143	97.2	102	0.265714	0.283714	0.2844	0.302167	519.286	71.5714	19.4	13.1667	933.571	46.8571	17	19.8333	70.8286	34.9571	21.88	14.5333	83.7286	40.9	26.08	16.8	35.33	38.0371	36.896	35.5417	69.5714	57.5714	54.2	51.6667	8.72857	4.75714
123	A G	A G	G G	G G	174.2	2.24105	94.2907	1.97447	131.089	2.11757	335.983	2.52632	54	0	6	93.0714	90.8		105.1	0.271429	0.270333		0.315	147.571	92.3333	406	230.9	241.286	106.333	154.714	76.3	11.98	8.9	13.1	25.4167	38.9071	26.8333	48.9857	66.83	32.2929	34.8667	32.4714	34.96	81.6429	57.6667	61.5714	59.5	7.24286	4.16667
124	A A	A G	G G	G G	176	2.24551			84.0714	1.92465	95.9478	1.98203	32	0	5	98.1729	119.767	108.933	108.667	0.306286	0.375833	0.330833	0.325667	235.071	455.167	107.2	90	231.571	262.833	103.2	51.6667	58.725	39.775	15.76	12.2333	118.286	76.525	43.58	48.2667	31.2286	33.0417	32.6833	35.5333	82.8571	59.5	66.1667	68.3333	8.52857	5.45833
125	A A	A A	A G	A G	92.0208	1.96389	34.1542	1.53344	37.8	1.57749	46.0833	1.66354	65	1	11	97.4	87.85	84.5	85	0.289857	0.266	0.2565	0.258	145.429	19.75	16	13	205.714	22.75	24.3333	20	16.65	4.575	3.63333	2.8	31.6667	13.125	9.7	5.6	29.4	30.45	29.8667	37.3	135	69.5	58.6667	62	14.2571	1.8
126	A G	A G	G G	A G			162.492	2.21083	77.1469	1.88732	124.372	2.09472	62	1	6	114.7	97.1		80	0.331667	0.2825		0.241	323.167	31.1429	38.6667	58.6667	424.167	42	50.3333	60.3333	26.2	70.3	49.8333	37.6667	94.8	122.186	93.0667	75	32.8333	37.4714	41	41.7	68.3333	42.8571	48	59	7.5	5.3
127	A A	A A	A G	G G	348.387	2.54206	244.212	2.38777	145.23	2.16206	122.952	2.08974	41	0	5	118.929	113.286	103.429	107.143	0.357143	0.341429	0.312857	0.321429	110.857	30.8571	25.2857	112.857	78.7143	30.4286	72.2857	190.429	19.4714	7.77143	5.08571	6.45714	41.9714	12.3429	9.24286	11.7571	38.8171	39.4014	34.6071	40.2129	47.7143	40.2857	40.5714	44.8571	5.05714	4.01429
128	A G	A A	A G	A G	79.3	1.89927	99.1309	1.99621	75.2214	1.87634	120	2.07918	39	0	8	116.671	95.9	74.3429	78.3286	0.332857	0.271429	0.203	0.216429	720.417	676.286	157.714	63.3333	711.25	439.143	94.5714	71.5	130.575	97.74	25.775	20.4	232.117	218.271	66.3714	49.4167	34.5333	30.8429	35.0571	34.2	59	53.4286	52.8571	54	6.63333	6.68571
139	T T	C T	C T	T T	43.7185	1.64067	31.8933	1.5037					55	0	10	86.9667	96.04			0.210667	0.2875			103.5	27.8			168.333	20.6			55.5333	21.6			90.2333	30.48			32.6233	37.202			68.8333	64.2			8.6	3.26
145	T T	T T	T T	T T	79.75	1.90173	67.3905	1.8286	56.55	1.75243			45	0	6	96.6	118.5			0.281429	0.35			158	85	99.25	37.8	233.429	84.8	36.75	19.8	22.5333	7.86	3.925	4	33.5429	15.4	7.675	10	33.1857	39.2	37.4	40.06	42.8	56.2	37.9	45.6	7.25714	5.04
150	T T	T T	C T	T C	18.725	1.27242	51.4937	1.71175	73.0721	1.86375	52.9879	1.72418	49	1	7	118.486	85.9167	81.6667	81.9857	0.335857	0.245	0.232167	0.233571	178.229	10.6	8.7	12.0429	1039.86	17.4167	27.0333	31.2429	66.3857	11.8833	5.53333	4.41429	76.1714	14.4	7.68333	7.12857	37.4614	36.6167	34.1667	40.2	88	68.6667	90.5	104.571	16.5429	11.8833
158	T T	T C	T C	T T	29.4236	1.4687	20.2315	1.30603	24.3438	1.38639	19.2639	1.28474	57	0	8	69.3857	80.76	96.56	111.5	0.198571	0.2372	0.272	0.336333	128.386	49.38	38.7	24.0333	79.5	33.74	33.64	25.4	8.95714	8.6	6.34	5.5	11.8714	11.9	8.06	6.86667	38.2429	40.18	37.54	37.7	121.714	66.4	51.6	58	11.8286	3.84
171	C T	T C	C C	C C	433.778	2.63727	240.747	2.38156	146.4	2.16554	168.767	2.22729	42	0	8	90.0714	94.5	93.78	101	0.268714	0.2944	0.2954	0.316	189.829	34.36	32.46	19.4	195.086	24.4	34.76	20.7	98.5143	33.58	14.66	11.4	117.471	40.74	17.5	14.6	30.9857	34.98	31.86	33.7	57.4286	50.6	45.8	57	6.91429	3.12
176	T C	C T	C T	C C	418.266	2.62145	531.737	2.7257	646.325	2.81045	364.62	2.56184	39	0	11	92.5714	101	81.5	91.2857	0.271429	0.293857	0.242333	0.266571	2936.86	143.243	79.3	49.6	3389.89	77.9714	149.367	88.6429	194.529	299.4	209.45	151.471	215.8	332.371	217.583	163.6	36.1429	33.0143	34.2833	33.2571	71.5714	37.8571	29.3333	31	23.6714	17.1571
[truncated: 2 more columns]
