# Supplementary material for: Effect of donor GSTM3 rs7483 genetic variant on tacrolimus elimination in the early period after liver transplantation
Source: PeerJ. 2024 Oct 23;12:e18360. doi: 10.7717/peerj.18360 (PMC11512548; doi:10.7717/peerj.18360)
Supplement: Supplemental Information 4 — In Cohort B (n=93), the raw data includes genetic variants and clinical characteristics. [file peerj-12-18360-s004.xls]

## Sheet: 93
Patient No	Donor rs7483 genotype	Recipient rs7483 genotype	Donor rs776746 genotype	Recipient rs776746 genotype	gender（Male：0；Female：1）	age	child-pugh	Tac C/D (Week1)	LOGW1	Tac C/D (Week2)	LOGW2	Tac C/D (Week3)	LOGW3	Tac C/D (Week4)	LOGW4	Tac C/D (Month 1)	LOGM1	TB(Week1)	TB(Week2)	TB(Week3)	TB(Week4)	TB(Month 1)
1	T/T	T/T	C/C	T/T	1	64	12	117.975	2.07179	127.873	2.10678	76.3588	1.88286	42.0179	1.62343	97.1669	1.98752	65	36	27	25	38
2	C/T	C/T	C/T	C/C	0	39	12	173.85	2.24017	253.333	2.40369	158.69	2.20055	124.608	2.09555	166.27	2.22081	110	35	40	30	46
3	T/T	T/T	C/C	T/T	0	51				389.815	2.59086	259.7	2.41447			324.757	2.51156	20	18	13	12	20
4	T/T	T/T	C/T	C/C	0	52	12	218.3	2.33905	289.587	2.46178	327.08	2.51465	172.42	2.23659	253.943	2.40474	180	47	29	71	83
5	T/T	T/T	C/C	C/C	0	36	13											339	270	200	155	243
6	T/T	T/T	C/C	C/T	0	45	13	260.13	2.41519	398.775	2.60073	103.102	2.01327	78.4136	1.89439	181.616	2.25915	149	34.5	23	19	34.5
7	C/T	C/T	C/T	C/T	0	48	9											229				229
8	T/T	C/C	C/T	C/C	0	48	11	71.2867	1.85301	111.37	2.04677	51.7119	1.71359	103.071	2.01314	87.1791	1.94041	35.5	13	13.5	11	24.5
9	C/T	T/T	C/T	C/C	0	57	11	186	2.26951	72.9	1.86273	168.4	2.22634	116.64	2.06685	142.52	2.15388	120	62	33	25.4	66
10	C/T	T/T	T/T	C/T	0	34	11	59.4533	1.77418	73.6	1.86688	57.3	1.75815	65.3333	1.81513	62.3933	1.79514	109	226	102	49.5	118
11	C/T	C/T	C/C	C/T	0	71	9	129.5	2.11227	152.425	2.18306	175.7	2.24477			152.425	2.18306	211	87	58		142
12	C/T	T/T	C/T	C/T	1	45	6			64.3125	1.8083	47.285	1.67472	45.7333	1.66023	47.285	1.67472	48	26	25.5	23	30
13	C/T	T/T	C/T	C/C	0	44	10	119.681	2.07803	173.956	2.24044	132.708	2.1229	94.0333	1.97328	126.195	2.10104	21	15	126	33	21
14	T/T	T/T	C/C	C/C	0	28	13			175.275	2.24372	127.395	2.10515	111.435	2.04702	127.395	2.10515	200	96	446	141	200
15	T/T	T/T	C/C	C/T	0	31	13	38.775	1.58855	71.0417	1.85151	78.4667	1.89469	50.9929	1.70751	61.0173	1.78545	60	135	80.5	27	62
16	C/T	C/T	C/C	C/C	0	30	7	159.25	2.20208	69.875	1.84432	478.725	2.68009	391.3	2.59251	275.275	2.43977	157	28	14	16	62.5
17	C/T	T/T	C/T	T/T	1	53	13											260	81			149
19	C/T	C/T	C/T	C/T	0	45	6	86.075	1.93488	60.9813	1.7852	60.2708	1.78011	38.0417	1.58026	60.626	1.78266	51	16	15	18	21
20	T/T	T/T	T/T	C/C	0	64	6	238.395	2.3773	139.725	2.14527	140.674	2.14821			140.674	2.14821	90	30	23	20	38
21	C/T	C/T	C/C	C/T	0	30	13
22	T/T	C/T	C/C	C/T	0	69	7	148	2.17026	338.333	2.52934	214.88	2.3322	98.5	1.99344	181.44	2.25873	95	64	39	35.5	78
23	C/T	C/T	C/C	C/C	0	56	5	215.511	2.33347	190.102	2.27899					202.807	2.30708	212	8.5	10	12	10.5
24	T/T	T/T	C/T	C/C	1	46	12	98.175	1.992	123.585	2.09197	128.333	2.10834	187.623	2.27329	125.959	2.10023	54	39	28.5	23	30
25	C/T	T/T	C/T	C/C	0	40	10	296.67	2.47227	187.24	2.2724	126.17	2.10096	172.716	2.23733	179.978	2.25522	29	20.5	23	22.5	27
27	C/C	C/T	C/C	T/T	0	57	12											275	339	7	4	274.5
28	T/T	C/T	C/T	C/C	0	52	6	103.437	2.01467	94.8083	1.97685	69.2953	1.8407	93.2067	1.96945	94.0075	1.97316	28	18.5	15	14	20
29	C/T	C/T	C/C	C/C	0	41	9	322.41	2.50841	544.665	2.73613	381.48	2.58147	396.33	2.59806	388.905	2.58984	44	25	14	14	32
30	C/T	C/T	T/T	T/T	0	62	5											130	30.5	24	19	30.5
31	C/T	T/T	C/C	C/C	0	52	10	464.8	2.66727	352	2.54654	198.6	2.29798	206.4	2.31471	279.2	2.44592	26	16	18	17	18.5
32	T/T	C/C	T/T	C/T	0	26	12
33	C/T	T/T	C/C	C/T	0	51	6	117.15	2.06874	330	2.51851	431.062	2.63454	238.425	2.37735	284.212	2.45364	25	15.5	13.5	13	19.5
34	C/T	T/T	C/C	C/C	0	62	10	147.55	2.16894	266.5	2.4257	200.2	2.30146	233.35	2.36801	216.775	2.33601	137	59	25	27	71
35	C/T	T/T	C/T	C/T	1	59		258.368	2.41224	208.69	2.3195	198.44	2.29763	343.785	2.53629	233.529	2.36834	157	41.5	23	11	58
36	C/C	T/T	C/C	C/C	0	60	14	376.71	2.57601	653.66	2.81535	442.25	2.64567	330.31	2.51892	409.48	2.61223	115	44	23.5	17	56
37	T/T	T/T	C/T	C/C	0	40	10	80.08	1.90352	82.53	1.91661	109.62	2.03989	77.1225	1.88718	81.305	1.91012	21	12.5	8.5	12	13
38	T/T	C/T	C/T	C/C	0	41	10	107.1	2.02979	72.437	1.85996	133.365	2.12504	128.18	2.10782	117.64	2.07056	39	23	16	20	25
39	T/T	T/T	T/T	T/T	1	53	10	49.265	1.69254	69.8413	1.84411	81.9444	1.91352	67.673	1.83042	68.7571	1.83732	25	44.5	26	24	25
40	T/T	T/T	C/C	C/C	0	47		201.977	2.3053	473.605	2.67542	319.95	2.50508	346.02	2.5391	332.985	2.52242	127	72	40	28	90
41	C/T	T/T	C/C	C/C	0	56	5	154.86	2.18994	336.762	2.52732	168.587	2.22682	210.25	2.32274	189.418	2.27742	114	24	14.5	12.5	41
42	T/T	T/T	T/T	C/C	0	60	14	458.85	2.66167	478.975	2.68031	193.2	2.28601	106.95	2.02918	326.025	2.51325	131.5	15	9	9.5	77
43	C/C	C/T	C/C	C/C	0	66	8	312.84	2.49532	238.5	2.37749	279.36	2.44616	311.4	2.49332	295.38	2.47038	37	14	12	11.5	14
44	T/T	C/T	C/C	C/T	0	49	7	134.85	2.12985	221.65	2.34567	199.795	2.30058	209.973	2.32216	204.884	2.31151	20	10.5	8.5	5.5	14
45	C/T	C/T	C/T	C/T	0	40	10			202.15	2.30567	158.113	2.19897	68.25	1.8341	158.113	2.19897	70	21	17	110	58
47	T/T	C/C	T/T	C/C	0	49	8	134.127	2.12751	104.935	2.02092	79.205	1.89875	66.805	1.82481	92.07	1.96412	24	14.5	12	14	17
49	T/T	T/T	C/C	C/T	0	58	6			389.88	2.59093	198.248	2.29721	137.903	2.13957	198.248	2.29721	19	14	12	9.5	14
50	C/T	C/T	C/T	C/T	1	57	12											190	297			193
51	T/T	C/T	C/T	C/C	0	62	8	138.556	2.14163	230.033	2.36179	129.31	2.11163	91.3713	1.96081	133.933	2.12689	20	9	9	8	10
52	T/T	C/T	C/T	C/C	0	52	5	147.479	2.16873	163.354	2.21313	153.511	2.18614			153.511	2.18614	24	13	14.5		17.5
53	C/T	C/T	T/T	C/C	1	30	13											215				215
54	C/T	T/T	C/C	C/C	0	34		145.8	2.16376	384.3	2.58467	218.25	2.33895	77.475	1.88916	182.025	2.26013	54	40	42	61	49
55	T/T	T/T	C/T	C/C	0	32	9	186.455	2.27057	224.725	2.35165	260.993	2.41663	294.664	2.46933	242.859	2.38535	28	64.5	77.5	41	46
56	C/T	T/T	C/T	C/C	0	47	11	402.47	2.60473	442.926	2.64633	484.439	2.68524	471.775	2.67374	457.35	2.66025	170	127	77.5	31	141
57	C/T	C/T	C/T	C/C	0	56	12			609.6	2.78505	724.32	2.85993			666.96	2.8241	142	46	24	13	33
58	T/T	C/C	C/T	T/T	0	46	8			637.91	2.80476					637.91	2.80476	57	74	65	78	63
59	C/C	C/T	C/C	C/C	0	45	11	123.55	2.09184	230.16	2.36203	151.2	2.17955	91.2333	1.96015	137.375	2.13791	33.5	22	31	30.5	30.5
61	C/T	T/T	C/T	C/C	1	48	11			44.4	1.64738	41.7536	1.62069	34.9071	1.54291	41.7536	1.62069	72	153.5	342.5	193	165
62	C/T	T/T	C/C	C/C	0	49	8	97.7067	1.98992	82.3467	1.91565	118.309	2.07302			97.7067	1.98992	93	51	36.5	33.5	57.5
63	T/T	T/T	C/T	C/C	0	58	11	115.05	2.06089	101.4	2.00604	89.5597	1.95211	110.89	2.04489	106.145	2.0259	45	36	24	21	35
65	C/T	C/T	C/C	C/C	0	62
66	T/T	C/T	T/T	C/T	0	54	8			52.65	1.7214	96.75	1.98565			74.7	1.87332	187	93	65	34	86.5
67	T/T	C/T	C/T	C/T	1	56	11											283				283
68	C/T	T/T	C/T	C/T	0	68	9	166.25	2.22076	57.6562	1.76085	117.969	2.07177	107.656	2.03204	112.812	2.05236	157	73	21.5	19.5	77.5
69	T/T	T/T	C/C	T/T	1	52	8	32.4	1.51055	51.25	1.70969	138.45	2.14129	121.4	2.08422	86.325	1.93614	107	53.5	50	39.5	60
70	C/T	T/T	C/C	C/C	0	46	8	93.195	1.96939	137.142	2.13717	268.47	2.4289			137.142	2.13717	28	20	23	25	24
71	C/T	T/T	T/T	C/C	0	51	9	178.325	2.25121	176.68	2.24719	324.45	2.51115	127.808	2.10656	177.502	2.2492	28	15	12	8	17
72	T/T	C/T	T/T	C/T	1	54	8	53.4	1.72754	85.55	1.93222	30.9125	1.49013	39.1125	1.59232	46.2563	1.66517	19	9.5	6	6	12
73	T/T	T/T	C/T	C/C	0	34	11	125.558	2.09885	167.992	2.22529	267.188	2.42682	200.07	2.30118	184.031	2.26489	316	147	50	52.5	94
74	T/T	T/T	C/T	C/T	0	36	10	106.625	2.02786	125.188	2.09756	86.1	1.935	112	2.04922	109.312	2.03867	47	32	20	14	35
76	C/T	C/C	C/C	T/T	0	35	10	139.533	2.14468	357.283	2.55301	259.35	2.41389	409.825	2.6126	308.317	2.489	122	77	27.5	7	100
77	C/T	T/T	C/C	C/C	0	51	8	98.1225	1.99177	203.068	2.30764	325.443	2.51248	160.793	2.20627	181.931	2.25991	59	33.5	24.5	19	35
78	T/T	T/T	C/C	C/C	0	34	7	88.6167	1.94752	114.611	2.05923	126.452	2.10193	74.5333	1.87235	101.614	2.00695	17	23.5	21	21	20
79	T/T	C/T	C/C	C/C	0	46	9	99.365	1.99723	162.945	2.21204	118.717	2.07451	112.767	2.05218	115.742	2.06349	55	44	28.5	19.5	45
80	T/T	T/T	T/T	C/T	0	50	10	207.725	2.31749	209	2.32015	177.123	2.24828	178.85	2.25249	193.287	2.2862	34	30	28	23	30
81	T/T	C/T	C/T	C/C	0	50	5	124.83	2.09632	182.4	2.26103	314.569	2.49772	187.245	2.27241	184.822	2.26675	86	31	24	19.5	37
82	C/T	T/T	C/C	C/T	0	37	9	73.225	1.86466	159.21	2.20197	264.625	2.42263	190.312	2.27947	174.761	2.24245	167	224	134	62.5	157
83	T/T	T/T	C/T	C/T	1	54	10	46.9625	1.67175	110.159	2.04202	86.0167	1.93458	109.57	2.03969	97.7933	1.99031	79	40	26.5	19	43
84	T/T	C/T	C/T	C/C	1	56	9	113.513	2.05504	103.35	2.01431	74.1375	1.87004	50.5125	1.7034	88.7438	1.94814	22	17	12	10	17
85	C/T	T/T	C/T	C/T	0	47	10
86	T/T	C/T	C/T	C/C	1	60	8	94.55	1.97566	109.393	2.03899	150.365	2.17715			109.393	2.03899	78	26	25.5	19.5	26
87	T/T	C/T	C/C	C/C	0	67	12	128.71	2.10961	106.174	2.02602	93.7367	1.97191	74.42	1.87169	99.9553	1.99981	129	68	42	40	75
88	C/T	C/C	C/T	C/C	1	42	9	136.407	2.13484	138.88	2.14264	60.2933	1.78027	102.032	2.00874	119.219	2.07635	45	25	28	22.5	29
89	T/T	C/T	C/T	C/C	0	58	6	23.69	1.37457	33.2925	1.52235	164.19	2.21535			33.2925	1.52235	64	24	22.5	15	28.5
90	C/T	C/T	T/T	T/T	0	30	12	86.025	1.93462	97.495	1.98898	166.47	2.22134	145.894	2.16404	121.694	2.08527	76	33	29	30	33
91	T/T	T/T	C/C	C/C	0	49	8	256.5	2.40909	669	2.82543	375	2.57403	169.5	2.22917	315.75	2.49934	68	27	18	24	29
92	T/T	T/T	C/T	C/C	1	34	5	30.9733	1.49099	37.26	1.57124	43.9683	1.64314	45.1183	1.65435	40.6142	1.60868	19	17	18	13.5	17
93	C/T	C/T	C/T	C/T	1	49	8	68.365	1.83483	65.3988	1.81557	79.7215	1.90158	38.2788	1.58296	66.8819	1.82531	62	26.5	19	22	44.5
94	T/T	T/T	C/C	C/T	0	56	5	27.44	1.43838	50.7267	1.70524	55.68	1.7457	54.64	1.73751	52.6833	1.72167	47	21	13.5	18	24
95	T/T	C/T	C/C	C/T	0	26	11	52.2667	1.71822	57.1073	1.75669	42.287	1.62621			52.2667	1.71822	57	24	18	16.5	36
96	C/T	C/T	C/C	C/C	0	41	9	34.65	1.5397	139.125	2.14341	205.625	2.31308	223.65	2.34957	172.375	2.23647	27	19	31	22.5	25
97	T/T	T/T	C/C	T/T	0	53	6	61.5	1.78888	231.25	2.36408	143.656	2.15732	47.0625	1.67267	102.578	2.01105	60	23	16	16	32
98	C/T	T/T	C/T	C/C	0	61	11	64.935	1.81248	88.1833	1.94539	80.845	1.90765	76.405	1.88312	78.625	1.89556	95	43	36	35	72.5
99	C/T	T/T	C/C	C/T	1	61	9	69.4375	1.84159	80.025	1.90323	78.925	1.89721	71.0875	1.85179	75.0062	1.8751	133	47	38.5	30	51
100	C/T	T/T	C/C	C/T	0	60	12	445.738	2.64908	1311.7	3.11783	486.941	2.68748	837.525	2.923	662.233	2.82101	134	108.5	56	49	84
