# Supplementary material for: Effect of donor GSTM3 rs7483 genetic variant on tacrolimus elimination in the early period after liver transplantation
Source: PeerJ. 2024 Oct 23;12:e18360. doi: 10.7717/peerj.18360 (PMC11512548; doi:10.7717/peerj.18360)
Supplement: Supplemental Information 5 [file peerj-12-18360-s005.xls]

## Sheet: 110
Number（Donor）	age（Donor）	gender（M：0；F：1）	DCD/DBD	Cause of death(trauma:1/Cerebrovascular accident:2)
1	43	1	DBD	2
2	29	0	DBD	1
3	61	0	DBD	2
4	40	0	DBD	2
5	39	0	DBD	1
6	46	0	DBD	2
7	23	0	DCD	1
8	54	0	DBD	2
9	33	0	DBD	1
10	49	1	DBD	2
11	51	0	DBD	2
12	43	0	DBD	2
13	52	0	DBD	2
14	38	1	DBD	2
15	41	1	DBD	2
16	47	0	DBD	2
17	40	0	DBD	2
18	39	0	DBD	2
19	47	0	DBD	2
20	48	0	DBD	2
21	55	0	DBD	2
22	40	0	DBD	2
23	53	0	DBD	2
24	45	0	DBD	2
25	60	1	DBD	2
26	45	0	DBD	2
27	57	0	DBD	2
28	37	0	DBD	2
29	41	0	DBD	2
30	49	0	DCD	2
31	27	0	DBD	1
32	51	0	DBD	2
33	50	0	DBD	2
34	42	0	DBD	2
35	41	0	DBD	2
36	49	0	DBD	2
37	37	0	DBD	1
38	39	0	DBD	2
39	53	0	DBD	2
40	52	1	DBD	2
41	38	0	DBD	2
42	57	0	DBD	2
43	59	0	DBD	2
44	43	1	DBD	2
45	46	0	DBD	2
46	31	0	DBD	1
47	43	0	DBD	2
48	51	1	DBD	2
49	39	1	DBD	1
50	53	0	DCD	2
51	45	1	DBD	2
52	57	0	DBD	2
53	51	0	DBD	2
54	54	0	DBD	2
55	55	1	DBD	2
56	53	0	DBD	2
57	57	0	DBD	2
58	56	1	DBD	2
59	45	0	DBD	2
60	47	0	DBD	2
61	54	1	DBD	2
62	49	0	DBD	2
63	34	0	DBD	1
64	44	0	DBD	2
65	51	0	DBD	2
66	53	1	DBD	2
67	48	0	DBD	2
68	45	0	DCD	2
69	43	0	DCD	2
70	46	0	DBD	2
71	47	0	DBD	2
72	46	0	DBD	2
73	57	0	DBD	2
74	41	0	DBD	2
75	57	0	DBD	2
76	54	0	DBD	2
77	56	0	DBD	2
78	41	0	DBD	2
79	54	0	DBD	2
80	63	0	DBD	2
81	51	0	DBD	2
82	55	0	DBD	2
83	43	1	DBD	2
84	57	0	DBD	2
85	59	0	DBD	2
86	43	1	DBD	1
87	45	0	DBD	2
88	60	0	DBD	2
89	57	0	DBD	2
90	23	0	DBD	1
91	48	0	DBD	2
92	45	0	DBD	2
93	38	0	DBD	2
94	32	1	DBD	1
95	50	1	DBD	2
96	57	0	DCD	2
97	48	0	DBD	2
98	51	0	DBD	2
99	55	0	DBD	2
100	36	1	DBD	1
101	63	0	DBD	2
102	61	0	DBD	2
103	43	0	DBD	1
104	33	0	DBD	2
105	56	0	DBD	1
106	47	0	DBD	2
107	51	1	DCD	2
108	60	0	DBD	2
109	45	0	DBD	2
110	46	0	DBD	2
