# Supplementary material for: Effect of donor GSTM3 rs7483 genetic variant on tacrolimus elimination in the early period after liver transplantation
Source: PeerJ. 2024 Oct 23;12:e18360. doi: 10.7717/peerj.18360 (PMC11512548; doi:10.7717/peerj.18360)
Supplement: Supplemental Information 6 [file peerj-12-18360-s006.xls]

## Sheet: 93
Number（Donor）	age（Donor）	gender（M：0；F：1）	DCD/DBD	Cause of death(trauma:1/Cerebrovascular accident:2)
1	59	1	DBD	2
2	33	0	DBD	1
3	48	0	DBD	2
4	60	0	DBD	2
5	33	0	DBD	1
6	51	1	DBD	2
7	51	0	DBD	2
8	55	0	DBD	2
9	57	0	DBD	2
10	33	0	DBD	2
11	69	0	DBD	2
12	42	0	DBD	2
13	45	0	DCD	2
14	23	0	DBD	1
15	29	0	DBD	1
16	35	0	DBD	2
17	49	1	DBD	2
18	48	0	DBD	2
19	65	0	DBD	2
20	29	1	DBD	1
21	67	0	DCD	2
22	55	0	DBD	2
23	39	0	DBD	2
24	51	0	DBD	2
25	49	0	DBD	2
26	55	0	DBD	2
27	46	0	DBD	2
28	59	0	DBD	2
29	55	1	DBD	2
30	23	0	DBD	1
31	55	0	DBD	2
32	65	0	DBD	2
33	61	0	DBD	2
34	55	1	DBD	1
35	36	0	DBD	1
36	47	0	DBD	2
37	49	1	DBD	2
38	55	0	DCD	2
39	50	0	DBD	2
40	65	0	DBD	2
41	57	0	DBD	2
42	55	0	DBD	2
43	35	0	DBD	1
44	51	0	DBD	2
45	61	0	DBD	2
46	57	0	DBD	2
47	63	0	DBD	2
48	55	0	DBD	2
49	26	1	DBD	1
50	39	0	DBD	2
51	29	0	DBD	1
52	55	0	DBD	2
53	59	0	DBD	2
54	44	0	DBD	2
55	48	0	DBD	2
56	58	0	DBD	2
57	51	0	DCD	2
58	61	0	DBD	2
59	65	0	DBD	2
60	49	0	DBD	2
61	60	1	DBD	2
62	67	0	DBD	2
63	55	1	DBD	2
64	50	0	DBD	2
65	54	0	DBD	2
66	59	0	DBD	2
67	33	0	DBD	1
68	39	0	DBD	2
69	40	0	DBD	2
70	55	0	DBD	2
71	32	0	DBD	2
72	57	0	DBD	2
73	54	0	DBD	2
74	49	1	DBD	2
75	39	0	DBD	2
76	56	1	DBD	2
77	55	1	DBD	2
78	49	0	DBD	2
79	61	0	DBD	2
80	68	0	DBD	2
81	45	1	DBD	2
82	61	0	DBD	2
83	23	0	DBD	1
84	51	0	DBD	2
85	31	1	DBD	1
86	55	1	DCD	2
87	57	0	DBD	2
88	21	0	DBD	1
89	42	0	DBD	2
90	56	0	DBD	2
91	65	0	DBD	2
92	65	0	DBD	2
93	57	0	DBD	2
